# Supplementary material
Source: MDPI journal article supplement (https://www.mdpi.com/2226-4310/5/1/1)
Supplement: s1 [file s1]

# Tabulated potential for E2-E2

E2-E2

N 600 R 0.0000001 11.9800001

|    |           |             |             |
|----|-----------|-------------|-------------|
| 1  | 0.0000001 | 0.46896E+05 | 0.39200E+05 |
| 2  | 0.0200001 | 0.46118E+05 | 0.38900E+05 |
| 3  | 0.0400001 | 0.45346E+05 | 0.38600E+05 |
| 4  | 0.0600001 | 0.44580E+05 | 0.38300E+05 |
| 5  | 0.0800001 | 0.43822E+05 | 0.37900E+05 |
| 6  | 0.1000001 | 0.43070E+05 | 0.37600E+05 |
| 7  | 0.1200001 | 0.42324E+05 | 0.37300E+05 |
| 8  | 0.1400001 | 0.41584E+05 | 0.37000E+05 |
| 9  | 0.1600001 | 0.40852E+05 | 0.36600E+05 |
| 10 | 0.1800001 | 0.40126E+05 | 0.36300E+05 |
| 11 | 0.2000001 | 0.39406E+05 | 0.36000E+05 |
| 12 | 0.2200001 | 0.38694E+05 | 0.35600E+05 |
| 13 | 0.2400001 | 0.37988E+05 | 0.35300E+05 |
| 14 | 0.2600001 | 0.37288E+05 | 0.35000E+05 |
| 15 | 0.2800001 | 0.36594E+05 | 0.34700E+05 |
| 16 | 0.3000001 | 0.35908E+05 | 0.34300E+05 |
| 17 | 0.3200001 | 0.35228E+05 | 0.34000E+05 |
| 18 | 0.3400001 | 0.34554E+05 | 0.33700E+05 |
| 19 | 0.3600001 | 0.33886E+05 | 0.33400E+05 |
| 20 | 0.3800001 | 0.33226E+05 | 0.33000E+05 |
| 21 | 0.4000001 | 0.32572E+05 | 0.32700E+05 |
| 22 | 0.4200001 | 0.31924E+05 | 0.32400E+05 |
| 23 | 0.4400001 | 0.31282E+05 | 0.32100E+05 |
| 24 | 0.4600001 | 0.30648E+05 | 0.31700E+05 |
| 25 | 0.4800001 | 0.30020E+05 | 0.31400E+05 |
| 26 | 0.5000001 | 0.29398E+05 | 0.31100E+05 |
| 27 | 0.5200001 | 0.28782E+05 | 0.30800E+05 |
| 28 | 0.5400001 | 0.28174E+05 | 0.30400E+05 |
| 29 | 0.5600001 | 0.27572E+05 | 0.30100E+05 |
| 30 | 0.5800001 | 0.26976E+05 | 0.29800E+05 |
| 31 | 0.6000001 | 0.26386E+05 | 0.29500E+05 |
| 32 | 0.6200001 | 0.25804E+05 | 0.29100E+05 |
| 33 | 0.6400001 | 0.25228E+05 | 0.28800E+05 |
| 34 | 0.6600001 | 0.24658E+05 | 0.28500E+05 |
| 35 | 0.6800001 | 0.24094E+05 | 0.28200E+05 |
| 36 | 0.7000001 | 0.23538E+05 | 0.27800E+05 |
| 37 | 0.7200001 | 0.22988E+05 | 0.27500E+05 |
| 38 | 0.7400001 | 0.22444E+05 | 0.27200E+05 |
| 39 | 0.7600001 | 0.21908E+05 | 0.26800E+05 |
| 40 | 0.7800001 | 0.21378E+05 | 0.26500E+05 |
| 41 | 0.8000001 | 0.20854E+05 | 0.26200E+05 |
| 42 | 0.8200001 | 0.20336E+05 | 0.25900E+05 |
| 43 | 0.8400001 | 0.19826E+05 | 0.25500E+05 |
| 44 | 0.8600001 | 0.19322E+05 | 0.25200E+05 |
| 45 | 0.8800001 | 0.18824E+05 | 0.24900E+05 |
| 46 | 0.9000001 | 0.18332E+05 | 0.24600E+05 |
| 47 | 0.9200001 | 0.17848E+05 | 0.24200E+05 |
| 48 | 0.9400001 | 0.17370E+05 | 0.23900E+05 |
| 49 | 0.9600001 | 0.16898E+05 | 0.23600E+05 |
| 50 | 0.9800001 | 0.16432E+05 | 0.23300E+05 |
| 51 | 1.0000001 | 0.15974E+05 | 0.22900E+05 |
| 52 | 1.0200001 | 0.15522E+05 | 0.22600E+05 |
| 53 | 1.0400001 | 0.15076E+05 | 0.22300E+05 |
| 54 | 1.0600001 | 0.14636E+05 | 0.22000E+05 |
| 55 | 1.0800001 | 0.14204E+05 | 0.21600E+05 |
| 56 | 1.1000001 | 0.13778E+05 | 0.21300E+05 |
| 57 | 1.1200001 | 0.13358E+05 | 0.21000E+05 |
| 58 | 1.1400001 | 0.12944E+05 | 0.20700E+05 |
| 59 | 1.1600001 | 0.12538E+05 | 0.20300E+05 |
| 60 | 1.1800001 | 0.12138E+05 | 0.20000E+05 |
| 61 | 1.2000001 | 0.11744E+05 | 0.19700E+05 |

|     |           |             |             |
|-----|-----------|-------------|-------------|
| 62  | 1.2200001 | 0.11356E+05 | 0.19400E+05 |
| 63  | 1.2400001 | 0.10976E+05 | 0.19000E+05 |
| 64  | 1.2600001 | 0.10602E+05 | 0.18700E+05 |
| 65  | 1.2800001 | 0.10234E+05 | 0.18400E+05 |
| 66  | 1.3000001 | 0.98735E+04 | 0.18000E+05 |
| 67  | 1.3200001 | 0.95195E+04 | 0.17700E+05 |
| 68  | 1.3400001 | 0.91715E+04 | 0.17400E+05 |
| 69  | 1.3600001 | 0.88295E+04 | 0.17100E+05 |
| 70  | 1.3800001 | 0.84955E+04 | 0.16700E+05 |
| 71  | 1.4000001 | 0.81675E+04 | 0.16400E+05 |
| 72  | 1.4200001 | 0.78455E+04 | 0.16100E+05 |
| 73  | 1.4400001 | 0.75295E+04 | 0.15800E+05 |
| 74  | 1.4600001 | 0.72215E+04 | 0.15400E+05 |
| 75  | 1.4800001 | 0.69195E+04 | 0.15100E+05 |
| 76  | 1.5000001 | 0.66235E+04 | 0.14800E+05 |
| 77  | 1.5200001 | 0.63335E+04 | 0.14500E+05 |
| 78  | 1.5400001 | 0.60515E+04 | 0.14100E+05 |
| 79  | 1.5600001 | 0.57755E+04 | 0.13800E+05 |
| 80  | 1.5800001 | 0.55055E+04 | 0.13500E+05 |
| 81  | 1.6000001 | 0.52415E+04 | 0.13200E+05 |
| 82  | 1.6200001 | 0.49855E+04 | 0.12800E+05 |
| 83  | 1.6400001 | 0.47355E+04 | 0.12500E+05 |
| 84  | 1.6600001 | 0.44915E+04 | 0.12200E+05 |
| 85  | 1.6800001 | 0.42535E+04 | 0.11900E+05 |
| 86  | 1.7000001 | 0.40235E+04 | 0.11500E+05 |
| 87  | 1.7200001 | 0.37995E+04 | 0.11200E+05 |
| 88  | 1.7400001 | 0.35815E+04 | 0.10900E+05 |
| 89  | 1.7600001 | 0.33695E+04 | 0.10600E+05 |
| 90  | 1.7800001 | 0.31655E+04 | 0.10200E+05 |
| 91  | 1.8000001 | 0.29675E+04 | 0.99000E+04 |
| 92  | 1.8200001 | 0.27759E+04 | 0.95800E+04 |
| 93  | 1.8400001 | 0.25909E+04 | 0.92500E+04 |
| 94  | 1.8600001 | 0.24125E+04 | 0.89200E+04 |
| 95  | 1.8800001 | 0.22405E+04 | 0.86000E+04 |
| 96  | 1.9000001 | 0.20751E+04 | 0.82700E+04 |
| 97  | 1.9200001 | 0.19161E+04 | 0.79500E+04 |
| 98  | 1.9400001 | 0.17637E+04 | 0.76200E+04 |
| 99  | 1.9600001 | 0.16179E+04 | 0.72900E+04 |
| 100 | 1.9800001 | 0.14785E+04 | 0.69700E+04 |
| 101 | 2.0000001 | 0.13457E+04 | 0.66400E+04 |
| 102 | 2.0200001 | 0.12193E+04 | 0.63200E+04 |
| 103 | 2.0400001 | 0.10995E+04 | 0.59900E+04 |
| 104 | 2.0600001 | 0.98634E+03 | 0.56600E+04 |
| 105 | 2.0800001 | 0.87954E+03 | 0.53400E+04 |
| 106 | 2.1000001 | 0.77934E+03 | 0.50100E+04 |
| 107 | 2.1200001 | 0.68554E+03 | 0.46900E+04 |
| 108 | 2.1400001 | 0.59834E+03 | 0.43600E+04 |
| 109 | 2.1600001 | 0.51774E+03 | 0.40300E+04 |
| 110 | 2.1800001 | 0.44354E+03 | 0.37100E+04 |
| 111 | 2.2000001 | 0.37594E+03 | 0.33800E+04 |
| 112 | 2.2200001 | 0.31474E+03 | 0.30600E+04 |
| 113 | 2.2400001 | 0.26014E+03 | 0.27300E+04 |
| 114 | 2.2600001 | 0.21194E+03 | 0.24100E+04 |
| 115 | 2.2800001 | 0.17034E+03 | 0.20800E+04 |
| 116 | 2.3000001 | 0.13534E+03 | 0.17500E+04 |
| 117 | 2.3200001 | 0.10674E+03 | 0.14300E+04 |
| 118 | 2.3400001 | 0.84736E+02 | 0.11000E+04 |
| 119 | 2.3600001 | 0.67636E+02 | 0.85500E+03 |
| 120 | 2.3800001 | 0.54276E+02 | 0.66800E+03 |
| 121 | 2.4000001 | 0.43776E+02 | 0.52500E+03 |
| 122 | 2.4200001 | 0.35476E+02 | 0.41500E+03 |
| 123 | 2.4400001 | 0.28876E+02 | 0.33000E+03 |
| 124 | 2.4600001 | 0.23616E+02 | 0.26300E+03 |
| 125 | 2.4800001 | 0.19396E+02 | 0.21100E+03 |
| 126 | 2.5000001 | 0.15996E+02 | 0.17000E+03 |
| 127 | 2.5200001 | 0.13236E+02 | 0.13800E+03 |

|     |           |              |              |
|-----|-----------|--------------|--------------|
| 128 | 2.5400001 | 0.10996E+02  | 0.11200E+03  |
| 129 | 2.5600001 | 0.91664E+01  | 0.91500E+02  |
| 130 | 2.5800001 | 0.76664E+01  | 0.75000E+02  |
| 131 | 2.6000001 | 0.64324E+01  | 0.61700E+02  |
| 132 | 2.6200001 | 0.54124E+01  | 0.51000E+02  |
| 133 | 2.6400001 | 0.45684E+01  | 0.42200E+02  |
| 134 | 2.6600001 | 0.38664E+01  | 0.35100E+02  |
| 135 | 2.6800001 | 0.32804E+01  | 0.29300E+02  |
| 136 | 2.7000001 | 0.27904E+01  | 0.24500E+02  |
| 137 | 2.7200001 | 0.23784E+01  | 0.20600E+02  |
| 138 | 2.7400001 | 0.20324E+01  | 0.17300E+02  |
| 139 | 2.7600001 | 0.17404E+01  | 0.14600E+02  |
| 140 | 2.7800001 | 0.14924E+01  | 0.12400E+02  |
| 141 | 2.8000001 | 0.12824E+01  | 0.10500E+02  |
| 142 | 2.8200001 | 0.11034E+01  | 0.89500E+01  |
| 143 | 2.8400001 | 0.95078E+00  | 0.76300E+01  |
| 144 | 2.8600001 | 0.82038E+00  | 0.65200E+01  |
| 145 | 2.8800001 | 0.70858E+00  | 0.55900E+01  |
| 146 | 2.9000001 | 0.61258E+00  | 0.48000E+01  |
| 147 | 2.9200001 | 0.52998E+00  | 0.41300E+01  |
| 148 | 2.9400001 | 0.45898E+00  | 0.35500E+01  |
| 149 | 2.9600001 | 0.39758E+00  | 0.30700E+01  |
| 150 | 2.9800001 | 0.34458E+00  | 0.26500E+01  |
| 151 | 3.0000001 | 0.29858E+00  | 0.23000E+01  |
| 152 | 3.0200001 | 0.25878E+00  | 0.19900E+01  |
| 153 | 3.0400001 | 0.22418E+00  | 0.17300E+01  |
| 154 | 3.0600001 | 0.19418E+00  | 0.15000E+01  |
| 155 | 3.0800001 | 0.16798E+00  | 0.13100E+01  |
| 156 | 3.1000001 | 0.14518E+00  | 0.11400E+01  |
| 157 | 3.1200001 | 0.12524E+00  | 0.99700E+00  |
| 158 | 3.1400001 | 0.10782E+00  | 0.87100E+00  |
| 159 | 3.1600001 | 0.92615E-01  | 0.76000E+00  |
| 160 | 3.1800001 | 0.79295E-01  | 0.66600E+00  |
| 161 | 3.2000001 | 0.67635E-01  | 0.58300E+00  |
| 162 | 3.2200001 | 0.57415E-01  | 0.51100E+00  |
| 163 | 3.2400001 | 0.48475E-01  | 0.44700E+00  |
| 164 | 3.2600001 | 0.40635E-01  | 0.39200E+00  |
| 165 | 3.2800001 | 0.33775E-01  | 0.34300E+00  |
| 166 | 3.3000001 | 0.27755E-01  | 0.30100E+00  |
| 167 | 3.3200001 | 0.22475E-01  | 0.26400E+00  |
| 168 | 3.3400001 | 0.17855E-01  | 0.23100E+00  |
| 169 | 3.3600001 | 0.13795E-01  | 0.20300E+00  |
| 170 | 3.3800001 | 0.10235E-01  | 0.17800E+00  |
| 171 | 3.4000001 | 0.71354E-02  | 0.15500E+00  |
| 172 | 3.4200001 | 0.44154E-02  | 0.13600E+00  |
| 173 | 3.4400001 | 0.20354E-02  | 0.11900E+00  |
| 174 | 3.4600001 | -0.24636E-04 | 0.10300E+00  |
| 175 | 3.4800001 | -0.18226E-02 | 0.89900E-01  |
| 176 | 3.5000001 | -0.33726E-02 | 0.77500E-01  |
| 177 | 3.5200001 | -0.47246E-02 | 0.67600E-01  |
| 178 | 3.5400001 | -0.58806E-02 | 0.57800E-01  |
| 179 | 3.5600001 | -0.68826E-02 | 0.50100E-01  |
| 180 | 3.5800001 | -0.77306E-02 | 0.42400E-01  |
| 181 | 3.6000001 | -0.84606E-02 | 0.36500E-01  |
| 182 | 3.6200001 | -0.90666E-02 | 0.30300E-01  |
| 183 | 3.6400001 | -0.95826E-02 | 0.25800E-01  |
| 184 | 3.6600001 | -0.10001E-01 | 0.20900E-01  |
| 185 | 3.6800001 | -0.10349E-01 | 0.17400E-01  |
| 186 | 3.7000001 | -0.10629E-01 | 0.14000E-01  |
| 187 | 3.7200001 | -0.10849E-01 | 0.11000E-01  |
| 188 | 3.7400001 | -0.11005E-01 | 0.78000E-02  |
| 189 | 3.7600001 | -0.11114E-01 | 0.54500E-02  |
| 190 | 3.7800001 | -0.11192E-01 | 0.39000E-02  |
| 191 | 3.8000001 | -0.11223E-01 | 0.15500E-02  |
| 192 | 3.8200001 | -0.11223E-01 | -0.87300E-06 |
| 193 | 3.8400001 | -0.11204E-01 | -0.95100E-03 |

|     |            |              |              |
|-----|------------|--------------|--------------|
| 194 | 3.86000001 | -0.11152E-01 | -0.26000E-02 |
| 195 | 3.88000001 | -0.11078E-01 | -0.37000E-02 |
| 196 | 3.90000001 | -0.10996E-01 | -0.41000E-02 |
| 197 | 3.92000001 | -0.10888E-01 | -0.54000E-02 |
| 198 | 3.94000001 | -0.10777E-01 | -0.55500E-02 |
| 199 | 3.96000001 | -0.10654E-01 | -0.61500E-02 |
| 200 | 3.98000001 | -0.10512E-01 | -0.71000E-02 |
| 201 | 4.00000001 | -0.10361E-01 | -0.75500E-02 |
| 202 | 4.02000001 | -0.10204E-01 | -0.78500E-02 |
| 203 | 4.04000001 | -0.10041E-01 | -0.81500E-02 |
| 204 | 4.06000001 | -0.98726E-02 | -0.84000E-02 |
| 205 | 4.08000001 | -0.97016E-02 | -0.85500E-02 |
| 206 | 4.10000001 | -0.95280E-02 | -0.86800E-02 |
| 207 | 4.12000001 | -0.93526E-02 | -0.87700E-02 |
| 208 | 4.14000001 | -0.91758E-02 | -0.88400E-02 |
| 209 | 4.16000001 | -0.89984E-02 | -0.88700E-02 |
| 210 | 4.18000001 | -0.88214E-02 | -0.88500E-02 |
| 211 | 4.20000001 | -0.86448E-02 | -0.88300E-02 |
| 212 | 4.22000001 | -0.84686E-02 | -0.88100E-02 |
| 213 | 4.24000001 | -0.82936E-02 | -0.87500E-02 |
| 214 | 4.26000001 | -0.81200E-02 | -0.86800E-02 |
| 215 | 4.28000001 | -0.79480E-02 | -0.86000E-02 |
| 216 | 4.30000001 | -0.77780E-02 | -0.85000E-02 |
| 217 | 4.32000001 | -0.76100E-02 | -0.84000E-02 |
| 218 | 4.34000001 | -0.74444E-02 | -0.82800E-02 |
| 219 | 4.36000001 | -0.72812E-02 | -0.81600E-02 |
| 220 | 4.38000001 | -0.71206E-02 | -0.80300E-02 |
| 221 | 4.40000001 | -0.69616E-02 | -0.79500E-02 |
| 222 | 4.42000001 | -0.68044E-02 | -0.78600E-02 |
| 223 | 4.44000001 | -0.66520E-02 | -0.76200E-02 |
| 224 | 4.46000001 | -0.65024E-02 | -0.74800E-02 |
| 225 | 4.48000001 | -0.63556E-02 | -0.73400E-02 |
| 226 | 4.50000001 | -0.62118E-02 | -0.71900E-02 |
| 227 | 4.52000001 | -0.60708E-02 | -0.70500E-02 |
| 228 | 4.54000001 | -0.59326E-02 | -0.69100E-02 |
| 229 | 4.56000001 | -0.57974E-02 | -0.67600E-02 |
| 230 | 4.58000001 | -0.56650E-02 | -0.66200E-02 |
| 231 | 4.60000001 | -0.55356E-02 | -0.64700E-02 |
| 232 | 4.62000001 | -0.54090E-02 | -0.63300E-02 |
| 233 | 4.64000001 | -0.52852E-02 | -0.61900E-02 |
| 234 | 4.66000001 | -0.51642E-02 | -0.60500E-02 |
| 235 | 4.68000001 | -0.50458E-02 | -0.59200E-02 |
| 236 | 4.70000001 | -0.49302E-02 | -0.57800E-02 |
| 237 | 4.72000001 | -0.48174E-02 | -0.56400E-02 |
| 238 | 4.74000001 | -0.47072E-02 | -0.55100E-02 |
| 239 | 4.76000001 | -0.45996E-02 | -0.53800E-02 |
| 240 | 4.78000001 | -0.44944E-02 | -0.52600E-02 |
| 241 | 4.80000001 | -0.43918E-02 | -0.51300E-02 |
| 242 | 4.82000001 | -0.42916E-02 | -0.50100E-02 |
| 243 | 4.84000001 | -0.41938E-02 | -0.48900E-02 |
| 244 | 4.86000001 | -0.40984E-02 | -0.47700E-02 |
| 245 | 4.88000001 | -0.40052E-02 | -0.46600E-02 |
| 246 | 4.90000001 | -0.39144E-02 | -0.45400E-02 |
| 247 | 4.92000001 | -0.38258E-02 | -0.44300E-02 |
| 248 | 4.94000001 | -0.37392E-02 | -0.43300E-02 |
| 249 | 4.96000001 | -0.36548E-02 | -0.42200E-02 |
| 250 | 4.98000001 | -0.35724E-02 | -0.41200E-02 |
| 251 | 5.00000001 | -0.34920E-02 | -0.40200E-02 |
| 252 | 5.02000001 | -0.34136E-02 | -0.39200E-02 |
| 253 | 5.04000001 | -0.33372E-02 | -0.38200E-02 |
| 254 | 5.06000001 | -0.32626E-02 | -0.37300E-02 |
| 255 | 5.08000001 | -0.31898E-02 | -0.36400E-02 |
| 256 | 5.10000001 | -0.31188E-02 | -0.35500E-02 |
| 257 | 5.12000001 | -0.30496E-02 | -0.34600E-02 |
| 258 | 5.14000001 | -0.29820E-02 | -0.33800E-02 |
| 259 | 5.16000001 | -0.29160E-02 | -0.33000E-02 |

| 12/13/16 |            | lammps.E2_E2.table |              | 5 |
|----------|------------|--------------------|--------------|---|
| 260      | 5.18000001 | -0.28518E-02       | -0.32100E-02 |   |
| 261      | 5.20000001 | -0.27890E-02       | -0.31400E-02 |   |
| 262      | 5.22000001 | -0.27278E-02       | -0.30600E-02 |   |
| 263      | 5.24000001 | -0.26680E-02       | -0.29900E-02 |   |
| 264      | 5.26000001 | -0.26098E-02       | -0.29100E-02 |   |
| 265      | 5.28000001 | -0.25530E-02       | -0.28400E-02 |   |
| 266      | 5.30000001 | -0.24976E-02       | -0.27700E-02 |   |
| 267      | 5.32000001 | -0.24436E-02       | -0.27000E-02 |   |
| 268      | 5.34000001 | -0.23908E-02       | -0.26400E-02 |   |
| 269      | 5.36000001 | -0.23392E-02       | -0.25800E-02 |   |
| 270      | 5.38000001 | -0.22890E-02       | -0.25100E-02 |   |
| 271      | 5.40000001 | -0.22400E-02       | -0.24500E-02 |   |
| 272      | 5.42000001 | -0.21922E-02       | -0.23900E-02 |   |
| 273      | 5.44000001 | -0.21454E-02       | -0.23400E-02 |   |
| 274      | 5.46000001 | -0.20998E-02       | -0.22800E-02 |   |
| 275      | 5.48000001 | -0.20554E-02       | -0.22200E-02 |   |
| 276      | 5.50000001 | -0.20120E-02       | -0.21700E-02 |   |
| 277      | 5.52000001 | -0.19696E-02       | -0.21200E-02 |   |
| 278      | 5.54000001 | -0.19282E-02       | -0.20700E-02 |   |
| 279      | 5.56000001 | -0.18878E-02       | -0.20200E-02 |   |
| 280      | 5.58000001 | -0.18484E-02       | -0.19700E-02 |   |
| 281      | 5.60000001 | -0.18098E-02       | -0.19300E-02 |   |
| 282      | 5.62000001 | -0.17720E-02       | -0.18900E-02 |   |
| 283      | 5.64000001 | -0.17352E-02       | -0.18400E-02 |   |
| 284      | 5.66000001 | -0.16994E-02       | -0.17900E-02 |   |
| 285      | 5.68000001 | -0.16644E-02       | -0.17500E-02 |   |
| 286      | 5.70000001 | -0.16302E-02       | -0.17100E-02 |   |
| 287      | 5.72000001 | -0.15968E-02       | -0.16700E-02 |   |
| 288      | 5.74000001 | -0.15642E-02       | -0.16300E-02 |   |
| 289      | 5.76000001 | -0.15324E-02       | -0.15900E-02 |   |
| 290      | 5.78000001 | -0.15014E-02       | -0.15500E-02 |   |
| 291      | 5.80000001 | -0.14710E-02       | -0.15200E-02 |   |
| 292      | 5.82000001 | -0.14414E-02       | -0.14800E-02 |   |
| 293      | 5.84000001 | -0.14124E-02       | -0.14500E-02 |   |
| 294      | 5.86000001 | -0.13842E-02       | -0.14100E-02 |   |
| 295      | 5.88000001 | -0.13564E-02       | -0.13900E-02 |   |
| 296      | 5.90000001 | -0.13294E-02       | -0.13500E-02 |   |
| 297      | 5.92000001 | -0.13030E-02       | -0.13200E-02 |   |
| 298      | 5.94000001 | -0.12772E-02       | -0.12900E-02 |   |
| 299      | 5.96000001 | -0.12520E-02       | -0.12600E-02 |   |
| 300      | 5.98000001 | -0.12274E-02       | -0.12300E-02 |   |
| 301      | 6.00000001 | -0.12032E-02       | -0.12100E-02 |   |
| 302      | 6.02000001 | -0.11796E-02       | -0.11800E-02 |   |
| 303      | 6.04000001 | -0.11566E-02       | -0.11500E-02 |   |
| 304      | 6.06000001 | -0.11340E-02       | -0.11300E-02 |   |
| 305      | 6.08000001 | -0.11120E-02       | -0.11000E-02 |   |
| 306      | 6.10000001 | -0.10904E-02       | -0.10800E-02 |   |
| 307      | 6.12000001 | -0.10694E-02       | -0.10500E-02 |   |
| 308      | 6.14000001 | -0.10488E-02       | -0.10300E-02 |   |
| 309      | 6.16000001 | -0.10288E-02       | -0.10000E-02 |   |
| 310      | 6.18000001 | -0.10091E-02       | -0.98500E-03 |   |
| 311      | 6.20000001 | -0.98990E-03       | -0.96000E-03 |   |
| 312      | 6.22000001 | -0.97110E-03       | -0.94000E-03 |   |
| 313      | 6.24000001 | -0.95270E-03       | -0.92000E-03 |   |
| 314      | 6.26000001 | -0.93470E-03       | -0.90000E-03 |   |
| 315      | 6.28000001 | -0.91710E-03       | -0.88000E-03 |   |
| 316      | 6.30000001 | -0.89988E-03       | -0.86100E-03 |   |
| 317      | 6.32000001 | -0.88302E-03       | -0.84300E-03 |   |
| 318      | 6.34000001 | -0.86654E-03       | -0.82400E-03 |   |
| 319      | 6.36000001 | -0.85040E-03       | -0.80700E-03 |   |
| 320      | 6.38000001 | -0.83462E-03       | -0.78900E-03 |   |
| 321      | 6.40000001 | -0.81918E-03       | -0.77200E-03 |   |
| 322      | 6.42000001 | -0.80406E-03       | -0.75600E-03 |   |
| 323      | 6.44000001 | -0.78926E-03       | -0.74000E-03 |   |
| 324      | 6.46000001 | -0.77476E-03       | -0.72500E-03 |   |
| 325      | 6.48000001 | -0.76058E-03       | -0.70900E-03 |   |

|     |           |              |              |
|-----|-----------|--------------|--------------|
| 326 | 6.5000001 | -0.74670E-03 | -0.69400E-03 |
| 327 | 6.5200001 | -0.73312E-03 | -0.67900E-03 |
| 328 | 6.5400001 | -0.71982E-03 | -0.66500E-03 |
| 329 | 6.5600001 | -0.70680E-03 | -0.65100E-03 |
| 330 | 6.5800001 | -0.69404E-03 | -0.63800E-03 |
| 331 | 6.6000001 | -0.68156E-03 | -0.62400E-03 |
| 332 | 6.6200001 | -0.66934E-03 | -0.61100E-03 |
| 333 | 6.6400001 | -0.65736E-03 | -0.59900E-03 |
| 334 | 6.6600001 | -0.64564E-03 | -0.58600E-03 |
| 335 | 6.6800001 | -0.63416E-03 | -0.57400E-03 |
| 336 | 6.7000001 | -0.62290E-03 | -0.56300E-03 |
| 337 | 6.7200001 | -0.61188E-03 | -0.55100E-03 |
| 338 | 6.7400001 | -0.60108E-03 | -0.54000E-03 |
| 339 | 6.7600001 | -0.59052E-03 | -0.52800E-03 |
| 340 | 6.7800001 | -0.58016E-03 | -0.51800E-03 |
| 341 | 6.8000001 | -0.57000E-03 | -0.50800E-03 |
| 342 | 6.8200001 | -0.56006E-03 | -0.49700E-03 |
| 343 | 6.8400001 | -0.55030E-03 | -0.48800E-03 |
| 344 | 6.8600001 | -0.54076E-03 | -0.47700E-03 |
| 345 | 6.8800001 | -0.53140E-03 | -0.46800E-03 |
| 346 | 6.9000001 | -0.52222E-03 | -0.45900E-03 |
| 347 | 6.9200001 | -0.51324E-03 | -0.44900E-03 |
| 348 | 6.9400001 | -0.50442E-03 | -0.44100E-03 |
| 349 | 6.9600001 | -0.49578E-03 | -0.43200E-03 |
| 350 | 6.9800001 | -0.48732E-03 | -0.42300E-03 |
| 351 | 7.0000001 | -0.47902E-03 | -0.41500E-03 |
| 352 | 7.0200001 | -0.47088E-03 | -0.40700E-03 |
| 353 | 7.0400001 | -0.46290E-03 | -0.39900E-03 |
| 354 | 7.0600001 | -0.45508E-03 | -0.39100E-03 |
| 355 | 7.0800001 | -0.44740E-03 | -0.38400E-03 |
| 356 | 7.1000001 | -0.43988E-03 | -0.37600E-03 |
| 357 | 7.1200001 | -0.43250E-03 | -0.36900E-03 |
| 358 | 7.1400001 | -0.42526E-03 | -0.36200E-03 |
| 359 | 7.1600001 | -0.41816E-03 | -0.35500E-03 |
| 360 | 7.1800001 | -0.41120E-03 | -0.34800E-03 |
| 361 | 7.2000001 | -0.40436E-03 | -0.34200E-03 |
| 362 | 7.2200001 | -0.39768E-03 | -0.33400E-03 |
| 363 | 7.2400001 | -0.39112E-03 | -0.32800E-03 |
| 364 | 7.2600001 | -0.38468E-03 | -0.32200E-03 |
| 365 | 7.2800001 | -0.37836E-03 | -0.31600E-03 |
| 366 | 7.3000001 | -0.37216E-03 | -0.31000E-03 |
| 367 | 7.3200001 | -0.36608E-03 | -0.30400E-03 |
| 368 | 7.3400001 | -0.36012E-03 | -0.29800E-03 |
| 369 | 7.3600001 | -0.35426E-03 | -0.29300E-03 |
| 370 | 7.3800001 | -0.34852E-03 | -0.28700E-03 |
| 371 | 7.4000001 | -0.34288E-03 | -0.28200E-03 |
| 372 | 7.4200001 | -0.33734E-03 | -0.27700E-03 |
| 373 | 7.4400001 | -0.33190E-03 | -0.27200E-03 |
| 374 | 7.4600001 | -0.32656E-03 | -0.26700E-03 |
| 375 | 7.4800001 | -0.32132E-03 | -0.26200E-03 |
| 376 | 7.5000001 | -0.31618E-03 | -0.25700E-03 |
| 377 | 7.5200001 | -0.31114E-03 | -0.25200E-03 |
| 378 | 7.5400001 | -0.30618E-03 | -0.24800E-03 |
| 379 | 7.5600001 | -0.30132E-03 | -0.24300E-03 |
| 380 | 7.5800001 | -0.29654E-03 | -0.23900E-03 |
| 381 | 7.6000001 | -0.29186E-03 | -0.23400E-03 |
| 382 | 7.6200001 | -0.28726E-03 | -0.23000E-03 |
| 383 | 7.6400001 | -0.28274E-03 | -0.22600E-03 |
| 384 | 7.6600001 | -0.27830E-03 | -0.22200E-03 |
| 385 | 7.6800001 | -0.27394E-03 | -0.21800E-03 |
| 386 | 7.7000001 | -0.26966E-03 | -0.21400E-03 |
| 387 | 7.7200001 | -0.26546E-03 | -0.21000E-03 |
| 388 | 7.7400001 | -0.26134E-03 | -0.20600E-03 |
| 389 | 7.7600001 | -0.25728E-03 | -0.20300E-03 |
| 390 | 7.7800001 | -0.25330E-03 | -0.19900E-03 |
| 391 | 7.8000001 | -0.24938E-03 | -0.19600E-03 |

|     |           |              |              |
|-----|-----------|--------------|--------------|
| 392 | 7.8200001 | -0.24554E-03 | -0.19200E-03 |
| 393 | 7.8400001 | -0.24176E-03 | -0.18900E-03 |
| 394 | 7.8600001 | -0.23808E-03 | -0.18400E-03 |
| 395 | 7.8800001 | -0.23444E-03 | -0.18200E-03 |
| 396 | 7.9000001 | -0.23086E-03 | -0.17900E-03 |
| 397 | 7.9200001 | -0.22734E-03 | -0.17600E-03 |
| 398 | 7.9400001 | -0.22388E-03 | -0.17300E-03 |
| 399 | 7.9600001 | -0.22048E-03 | -0.17000E-03 |
| 400 | 7.9800001 | -0.21714E-03 | -0.16700E-03 |
| 401 | 8.0000001 | -0.21386E-03 | -0.16400E-03 |
| 402 | 8.0200001 | -0.21064E-03 | -0.16100E-03 |
| 403 | 8.0400001 | -0.20748E-03 | -0.15800E-03 |
| 404 | 8.0600001 | -0.20436E-03 | -0.15600E-03 |
| 405 | 8.0800001 | -0.20130E-03 | -0.15300E-03 |
| 406 | 8.1000001 | -0.19830E-03 | -0.15000E-03 |
| 407 | 8.1200001 | -0.19534E-03 | -0.14800E-03 |
| 408 | 8.1400001 | -0.19242E-03 | -0.14600E-03 |
| 409 | 8.1600001 | -0.18956E-03 | -0.14300E-03 |
| 410 | 8.1800001 | -0.18676E-03 | -0.14000E-03 |
| 411 | 8.2000001 | -0.18400E-03 | -0.13800E-03 |
| 412 | 8.2200001 | -0.18128E-03 | -0.13600E-03 |
| 413 | 8.2400001 | -0.17860E-03 | -0.13400E-03 |
| 414 | 8.2600001 | -0.17598E-03 | -0.13100E-03 |
| 415 | 8.2800001 | -0.17340E-03 | -0.12900E-03 |
| 416 | 8.3000001 | -0.17086E-03 | -0.12700E-03 |
| 417 | 8.3200001 | -0.16836E-03 | -0.12500E-03 |
| 418 | 8.3400001 | -0.16590E-03 | -0.12300E-03 |
| 419 | 8.3600001 | -0.16348E-03 | -0.12100E-03 |
| 420 | 8.3800001 | -0.16110E-03 | -0.11900E-03 |
| 421 | 8.4000001 | -0.15876E-03 | -0.11700E-03 |
| 422 | 8.4200001 | -0.15646E-03 | -0.11500E-03 |
| 423 | 8.4400001 | -0.15420E-03 | -0.11300E-03 |
| 424 | 8.4600001 | -0.15198E-03 | -0.11100E-03 |
| 425 | 8.4800001 | -0.14980E-03 | -0.10900E-03 |
| 426 | 8.5000001 | -0.14764E-03 | -0.10800E-03 |
| 427 | 8.5200001 | -0.14552E-03 | -0.10600E-03 |
| 428 | 8.5400001 | -0.14344E-03 | -0.10400E-03 |
| 429 | 8.5600001 | -0.14140E-03 | -0.10200E-03 |
| 430 | 8.5800001 | -0.13938E-03 | -0.10100E-03 |
| 431 | 8.6000001 | -0.13739E-03 | -0.99200E-04 |
| 432 | 8.6200001 | -0.13544E-03 | -0.97700E-04 |
| 433 | 8.6400001 | -0.13353E-03 | -0.95700E-04 |
| 434 | 8.6600001 | -0.13163E-03 | -0.94700E-04 |
| 435 | 8.6800001 | -0.12978E-03 | -0.92700E-04 |
| 436 | 8.7000001 | -0.12794E-03 | -0.91700E-04 |
| 437 | 8.7200001 | -0.12615E-03 | -0.89700E-04 |
| 438 | 8.7400001 | -0.12438E-03 | -0.88700E-04 |
| 439 | 8.7600001 | -0.12263E-03 | -0.87200E-04 |
| 440 | 8.7800001 | -0.12092E-03 | -0.85700E-04 |
| 441 | 8.8000001 | -0.11922E-03 | -0.84700E-04 |
| 442 | 8.8200001 | -0.11756E-03 | -0.83200E-04 |
| 443 | 8.8400001 | -0.11593E-03 | -0.81700E-04 |
| 444 | 8.8600001 | -0.11432E-03 | -0.80200E-04 |
| 445 | 8.8800001 | -0.11274E-03 | -0.79200E-04 |
| 446 | 8.9000001 | -0.11117E-03 | -0.78200E-04 |
| 447 | 8.9200001 | -0.10964E-03 | -0.76700E-04 |
| 448 | 8.9400001 | -0.10813E-03 | -0.75700E-04 |
| 449 | 8.9600001 | -0.10663E-03 | -0.74700E-04 |
| 450 | 8.9800001 | -0.10516E-03 | -0.73700E-04 |
| 451 | 9.0000001 | -0.10371E-03 | -0.72200E-04 |
| 452 | 9.0200001 | -0.10231E-03 | -0.70200E-04 |
| 453 | 9.0400001 | -0.10092E-03 | -0.69700E-04 |
| 454 | 9.0600001 | -0.99533E-04 | -0.69200E-04 |
| 455 | 9.0800001 | -0.98169E-04 | -0.68200E-04 |
| 456 | 9.1000001 | -0.96835E-04 | -0.66700E-04 |
| 457 | 9.1200001 | -0.95517E-04 | -0.65900E-04 |

| 12/13/16 | lammps.E2_E2.table |              |              | 8 |
|----------|--------------------|--------------|--------------|---|
| 458      | 9.14000001         | -0.94219E-04 | -0.64900E-04 |   |
| 459      | 9.16000001         | -0.92941E-04 | -0.63900E-04 |   |
| 460      | 9.18000001         | -0.91681E-04 | -0.63000E-04 |   |
| 461      | 9.20000001         | -0.90441E-04 | -0.62000E-04 |   |
| 462      | 9.22000001         | -0.89219E-04 | -0.61100E-04 |   |
| 463      | 9.24000001         | -0.88015E-04 | -0.60200E-04 |   |
| 464      | 9.26000001         | -0.86829E-04 | -0.59300E-04 |   |
| 465      | 9.28000001         | -0.85661E-04 | -0.58400E-04 |   |
| 466      | 9.30000001         | -0.84509E-04 | -0.57600E-04 |   |
| 467      | 9.32000001         | -0.83375E-04 | -0.56700E-04 |   |
| 468      | 9.34000001         | -0.82259E-04 | -0.55800E-04 |   |
| 469      | 9.36000001         | -0.81159E-04 | -0.55000E-04 |   |
| 470      | 9.38000001         | -0.80075E-04 | -0.54200E-04 |   |
| 471      | 9.40000001         | -0.79007E-04 | -0.53400E-04 |   |
| 472      | 9.42000001         | -0.77955E-04 | -0.52600E-04 |   |
| 473      | 9.44000001         | -0.76917E-04 | -0.51900E-04 |   |
| 474      | 9.46000001         | -0.75895E-04 | -0.51100E-04 |   |
| 475      | 9.48000001         | -0.74889E-04 | -0.50300E-04 |   |
| 476      | 9.50000001         | -0.73895E-04 | -0.49700E-04 |   |
| 477      | 9.52000001         | -0.72917E-04 | -0.48900E-04 |   |
| 478      | 9.54000001         | -0.71953E-04 | -0.48200E-04 |   |
| 479      | 9.56000001         | -0.71003E-04 | -0.47500E-04 |   |
| 480      | 9.58000001         | -0.70067E-04 | -0.46800E-04 |   |
| 481      | 9.60000001         | -0.69145E-04 | -0.46100E-04 |   |
| 482      | 9.62000001         | -0.68237E-04 | -0.45400E-04 |   |
| 483      | 9.64000001         | -0.67341E-04 | -0.44800E-04 |   |
| 484      | 9.66000001         | -0.66459E-04 | -0.44100E-04 |   |
| 485      | 9.68000001         | -0.65589E-04 | -0.43500E-04 |   |
| 486      | 9.70000001         | -0.64731E-04 | -0.42900E-04 |   |
| 487      | 9.72000001         | -0.63885E-04 | -0.42300E-04 |   |
| 488      | 9.74000001         | -0.63051E-04 | -0.41700E-04 |   |
| 489      | 9.76000001         | -0.62229E-04 | -0.41100E-04 |   |
| 490      | 9.78000001         | -0.61419E-04 | -0.40500E-04 |   |
| 491      | 9.80000001         | -0.60619E-04 | -0.40000E-04 |   |
| 492      | 9.82000001         | -0.59831E-04 | -0.39400E-04 |   |
| 493      | 9.84000001         | -0.59055E-04 | -0.38800E-04 |   |
| 494      | 9.86000001         | -0.58289E-04 | -0.38300E-04 |   |
| 495      | 9.88000001         | -0.57535E-04 | -0.37700E-04 |   |
| 496      | 9.90000001         | -0.56789E-04 | -0.37300E-04 |   |
| 497      | 9.92000001         | -0.56055E-04 | -0.36700E-04 |   |
| 498      | 9.94000001         | -0.55331E-04 | -0.36200E-04 |   |
| 499      | 9.96000001         | -0.54617E-04 | -0.35700E-04 |   |
| 500      | 9.98000001         | -0.53913E-04 | -0.35200E-04 |   |
| 501      | 10.00000001        | -0.53219E-04 | -0.34700E-04 |   |
| 502      | 10.02000001        | -0.52535E-04 | -0.34200E-04 |   |
| 503      | 10.04000001        | -0.51857E-04 | -0.33900E-04 |   |
| 504      | 10.06000001        | -0.51185E-04 | -0.33600E-04 |   |
| 505      | 10.08000001        | -0.50521E-04 | -0.33200E-04 |   |
| 506      | 10.10000001        | -0.49857E-04 | -0.33200E-04 |   |
| 507      | 10.12000001        | -0.49201E-04 | -0.32800E-04 |   |
| 508      | 10.14000001        | -0.48549E-04 | -0.32600E-04 |   |
| 509      | 10.16000001        | -0.47907E-04 | -0.32100E-04 |   |
| 510      | 10.18000001        | -0.47273E-04 | -0.31700E-04 |   |
| 511      | 10.20000001        | -0.46645E-04 | -0.31400E-04 |   |
| 512      | 10.22000001        | -0.46027E-04 | -0.30900E-04 |   |
| 513      | 10.24000001        | -0.45417E-04 | -0.30500E-04 |   |
| 514      | 10.26000001        | -0.44815E-04 | -0.30100E-04 |   |
| 515      | 10.28000001        | -0.44223E-04 | -0.29600E-04 |   |
| 516      | 10.30000001        | -0.43645E-04 | -0.28900E-04 |   |
| 517      | 10.32000001        | -0.43069E-04 | -0.28800E-04 |   |
| 518      | 10.34000001        | -0.42501E-04 | -0.28400E-04 |   |
| 519      | 10.36000001        | -0.41943E-04 | -0.27900E-04 |   |
| 520      | 10.38000001        | -0.41391E-04 | -0.27600E-04 |   |
| 521      | 10.40000001        | -0.40847E-04 | -0.27200E-04 |   |
| 522      | 10.42000001        | -0.40309E-04 | -0.26900E-04 |   |
| 523      | 10.44000001        | -0.39779E-04 | -0.26500E-04 |   |



|     |            |              |              |
|-----|------------|--------------|--------------|
| 524 | 10.4600001 | -0.39257E-04 | -0.26100E-04 |
| 525 | 10.4800001 | -0.38739E-04 | -0.25900E-04 |
| 526 | 10.5000001 | -0.38229E-04 | -0.25500E-04 |
| 527 | 10.5200001 | -0.37721E-04 | -0.25400E-04 |
| 528 | 10.5400001 | -0.37223E-04 | -0.24900E-04 |
| 529 | 10.5600001 | -0.36735E-04 | -0.24400E-04 |
| 530 | 10.5800001 | -0.36253E-04 | -0.24100E-04 |
| 531 | 10.6000001 | -0.35777E-04 | -0.23800E-04 |
| 532 | 10.6200001 | -0.35307E-04 | -0.23500E-04 |
| 533 | 10.6400001 | -0.34843E-04 | -0.23200E-04 |
| 534 | 10.6600001 | -0.34385E-04 | -0.22900E-04 |
| 535 | 10.6800001 | -0.33931E-04 | -0.22700E-04 |
| 536 | 10.7000001 | -0.33483E-04 | -0.22400E-04 |
| 537 | 10.7200001 | -0.33039E-04 | -0.22200E-04 |
| 538 | 10.7400001 | -0.32601E-04 | -0.21900E-04 |
| 539 | 10.7600001 | -0.32167E-04 | -0.21700E-04 |
| 540 | 10.7800001 | -0.31739E-04 | -0.21400E-04 |
| 541 | 10.8000001 | -0.31315E-04 | -0.21200E-04 |
| 542 | 10.8200001 | -0.30897E-04 | -0.20900E-04 |
| 543 | 10.8400001 | -0.30483E-04 | -0.20700E-04 |
| 544 | 10.8600001 | -0.30075E-04 | -0.20400E-04 |
| 545 | 10.8800001 | -0.29671E-04 | -0.20200E-04 |
| 546 | 10.9000001 | -0.29273E-04 | -0.19900E-04 |
| 547 | 10.9200001 | -0.28879E-04 | -0.19700E-04 |
| 548 | 10.9400001 | -0.28491E-04 | -0.19400E-04 |
| 549 | 10.9600001 | -0.28107E-04 | -0.19200E-04 |
| 550 | 10.9800001 | -0.27729E-04 | -0.18900E-04 |
| 551 | 11.0000001 | -0.27355E-04 | -0.18700E-04 |
| 552 | 11.0200001 | -0.26987E-04 | -0.18400E-04 |
| 553 | 11.0400001 | -0.26623E-04 | -0.18200E-04 |
| 554 | 11.0600001 | -0.26265E-04 | -0.17900E-04 |
| 555 | 11.0800001 | -0.25911E-04 | -0.17700E-04 |
| 556 | 11.1000001 | -0.25563E-04 | -0.17400E-04 |
| 557 | 11.1200001 | -0.25221E-04 | -0.17100E-04 |
| 558 | 11.1400001 | -0.24883E-04 | -0.16900E-04 |
| 559 | 11.1600001 | -0.24551E-04 | -0.16600E-04 |
| 560 | 11.1800001 | -0.24223E-04 | -0.16400E-04 |
| 561 | 11.2000001 | -0.23901E-04 | -0.16100E-04 |
| 562 | 11.2200001 | -0.23583E-04 | -0.15900E-04 |
| 563 | 11.2400001 | -0.23271E-04 | -0.15600E-04 |
| 564 | 11.2600001 | -0.22963E-04 | -0.15400E-04 |
| 565 | 11.2800001 | -0.22661E-04 | -0.15100E-04 |
| 566 | 11.3000001 | -0.22363E-04 | -0.14900E-04 |
| 567 | 11.3200001 | -0.22071E-04 | -0.14600E-04 |
| 568 | 11.3400001 | -0.21783E-04 | -0.14400E-04 |
| 569 | 11.3600001 | -0.21501E-04 | -0.14100E-04 |
| 570 | 11.3800001 | -0.21223E-04 | -0.13900E-04 |
| 571 | 11.4000001 | -0.20951E-04 | -0.13600E-04 |
| 572 | 11.4200001 | -0.20683E-04 | -0.13400E-04 |
| 573 | 11.4400001 | -0.20421E-04 | -0.13100E-04 |
| 574 | 11.4600001 | -0.20163E-04 | -0.12900E-04 |
| 575 | 11.4800001 | -0.19911E-04 | -0.12600E-04 |
| 576 | 11.5000001 | -0.19663E-04 | -0.12400E-04 |
| 577 | 11.5200001 | -0.19421E-04 | -0.12100E-04 |
| 578 | 11.5400001 | -0.19183E-04 | -0.11900E-04 |
| 579 | 11.5600001 | -0.18951E-04 | -0.11600E-04 |
| 580 | 11.5800001 | -0.18723E-04 | -0.11400E-04 |
| 581 | 11.6000001 | -0.18501E-04 | -0.11100E-04 |
| 582 | 11.6200001 | -0.18283E-04 | -0.10900E-04 |
| 583 | 11.6400001 | -0.18071E-04 | -0.10600E-04 |
| 584 | 11.6600001 | -0.17863E-04 | -0.10400E-04 |
| 585 | 11.6800001 | -0.17661E-04 | -0.10100E-04 |
| 586 | 11.7000001 | -0.17463E-04 | -0.98700E-05 |
| 587 | 11.7200001 | -0.17271E-04 | -0.96200E-05 |
| 588 | 11.7400001 | -0.17271E-04 | 0.00000E+00  |
| 589 | 11.7600001 | -0.17271E-04 | 0.00000E+00  |

|     |            |              |              |
|-----|------------|--------------|--------------|
| 590 | 11.7800001 | 0.000000E+00 | 0.000000E+00 |
| 591 | 11.8000001 | 0.000000E+00 | 0.000000E+00 |
| 592 | 11.8200001 | 0.000000E+00 | 0.000000E+00 |
| 593 | 11.8400001 | 0.000000E+00 | 0.000000E+00 |
| 594 | 11.8600001 | 0.000000E+00 | 0.000000E+00 |
| 595 | 11.8800001 | 0.000000E+00 | 0.000000E+00 |
| 596 | 11.9000001 | 0.000000E+00 | 0.000000E+00 |
| 597 | 11.9200001 | 0.000000E+00 | 0.000000E+00 |
| 598 | 11.9400001 | 0.000000E+00 | 0.000000E+00 |
| 599 | 11.9600001 | 0.000000E+00 | 0.000000E+00 |
| 600 | 11.9800001 | 0.000000E+00 | 0.000000E+00 |
