# Supplementary material
Source: MDPI journal article supplement (https://www.mdpi.com/2226-4310/5/1/1)
Supplement: s1 [file s1]

# Tabulated potential for NN-NN

NN-NN

N 600 R 0.0000001 11.9800001

|    |           |             |             |
|----|-----------|-------------|-------------|
| 1  | 0.0000001 | 0.12976E+05 | 0.78400E+04 |
| 2  | 0.0200001 | 0.12820E+05 | 0.78000E+04 |
| 3  | 0.0400001 | 0.12665E+05 | 0.77500E+04 |
| 4  | 0.0600001 | 0.12511E+05 | 0.77000E+04 |
| 5  | 0.0800001 | 0.12358E+05 | 0.76500E+04 |
| 6  | 0.1000001 | 0.12206E+05 | 0.76100E+04 |
| 7  | 0.1200001 | 0.12055E+05 | 0.75600E+04 |
| 8  | 0.1400001 | 0.11905E+05 | 0.75100E+04 |
| 9  | 0.1600001 | 0.11755E+05 | 0.74700E+04 |
| 10 | 0.1800001 | 0.11607E+05 | 0.74200E+04 |
| 11 | 0.2000001 | 0.11459E+05 | 0.73700E+04 |
| 12 | 0.2200001 | 0.11313E+05 | 0.73200E+04 |
| 13 | 0.2400001 | 0.11167E+05 | 0.72800E+04 |
| 14 | 0.2600001 | 0.11023E+05 | 0.72300E+04 |
| 15 | 0.2800001 | 0.10879E+05 | 0.71800E+04 |
| 16 | 0.3000001 | 0.10737E+05 | 0.71300E+04 |
| 17 | 0.3200001 | 0.10595E+05 | 0.70900E+04 |
| 18 | 0.3400001 | 0.10454E+05 | 0.70400E+04 |
| 19 | 0.3600001 | 0.10314E+05 | 0.69900E+04 |
| 20 | 0.3800001 | 0.10175E+05 | 0.69500E+04 |
| 21 | 0.4000001 | 0.10037E+05 | 0.69000E+04 |
| 22 | 0.4200001 | 0.99002E+04 | 0.68500E+04 |
| 23 | 0.4400001 | 0.97642E+04 | 0.68000E+04 |
| 24 | 0.4600001 | 0.96290E+04 | 0.67600E+04 |
| 25 | 0.4800001 | 0.94948E+04 | 0.67100E+04 |
| 26 | 0.5000001 | 0.93616E+04 | 0.66600E+04 |
| 27 | 0.5200001 | 0.92292E+04 | 0.66200E+04 |
| 28 | 0.5400001 | 0.90978E+04 | 0.65700E+04 |
| 29 | 0.5600001 | 0.89674E+04 | 0.65200E+04 |
| 30 | 0.5800001 | 0.88380E+04 | 0.64700E+04 |
| 31 | 0.6000001 | 0.87094E+04 | 0.64300E+04 |
| 32 | 0.6200001 | 0.85818E+04 | 0.63800E+04 |
| 33 | 0.6400001 | 0.84552E+04 | 0.63300E+04 |
| 34 | 0.6600001 | 0.83294E+04 | 0.62900E+04 |
| 35 | 0.6800001 | 0.82046E+04 | 0.62400E+04 |
| 36 | 0.7000001 | 0.80808E+04 | 0.61900E+04 |
| 37 | 0.7200001 | 0.79580E+04 | 0.61400E+04 |
| 38 | 0.7400001 | 0.78360E+04 | 0.61000E+04 |
| 39 | 0.7600001 | 0.77150E+04 | 0.60500E+04 |
| 40 | 0.7800001 | 0.75950E+04 | 0.60000E+04 |
| 41 | 0.8000001 | 0.74758E+04 | 0.59600E+04 |
| 42 | 0.8200001 | 0.73576E+04 | 0.59100E+04 |
| 43 | 0.8400001 | 0.72404E+04 | 0.58600E+04 |
| 44 | 0.8600001 | 0.71242E+04 | 0.58100E+04 |
| 45 | 0.8800001 | 0.70088E+04 | 0.57700E+04 |
| 46 | 0.9000001 | 0.68944E+04 | 0.57200E+04 |
| 47 | 0.9200001 | 0.67810E+04 | 0.56700E+04 |
| 48 | 0.9400001 | 0.66684E+04 | 0.56300E+04 |
| 49 | 0.9600001 | 0.65568E+04 | 0.55800E+04 |
| 50 | 0.9800001 | 0.64462E+04 | 0.55300E+04 |
| 51 | 1.0000001 | 0.63366E+04 | 0.54800E+04 |
| 52 | 1.0200001 | 0.62278E+04 | 0.54400E+04 |
| 53 | 1.0400001 | 0.61200E+04 | 0.53900E+04 |
| 54 | 1.0600001 | 0.60132E+04 | 0.53400E+04 |
| 55 | 1.0800001 | 0.59074E+04 | 0.52900E+04 |
| 56 | 1.1000001 | 0.58024E+04 | 0.52500E+04 |
| 57 | 1.1200001 | 0.56984E+04 | 0.52000E+04 |
| 58 | 1.1400001 | 0.55954E+04 | 0.51500E+04 |
| 59 | 1.1600001 | 0.54932E+04 | 0.51100E+04 |
| 60 | 1.1800001 | 0.53920E+04 | 0.50600E+04 |
| 61 | 1.2000001 | 0.52918E+04 | 0.50100E+04 |

|     |           |             |             |
|-----|-----------|-------------|-------------|
| 62  | 1.2200001 | 0.51926E+04 | 0.49600E+04 |
| 63  | 1.2400001 | 0.50942E+04 | 0.49200E+04 |
| 64  | 1.2600001 | 0.49968E+04 | 0.48700E+04 |
| 65  | 1.2800001 | 0.49004E+04 | 0.48200E+04 |
| 66  | 1.3000001 | 0.48048E+04 | 0.47800E+04 |
| 67  | 1.3200001 | 0.47102E+04 | 0.47300E+04 |
| 68  | 1.3400001 | 0.46166E+04 | 0.46800E+04 |
| 69  | 1.3600001 | 0.45240E+04 | 0.46300E+04 |
| 70  | 1.3800001 | 0.44322E+04 | 0.45900E+04 |
| 71  | 1.4000001 | 0.43414E+04 | 0.45400E+04 |
| 72  | 1.4200001 | 0.42516E+04 | 0.44900E+04 |
| 73  | 1.4400001 | 0.41626E+04 | 0.44500E+04 |
| 74  | 1.4600001 | 0.40746E+04 | 0.44000E+04 |
| 75  | 1.4800001 | 0.39876E+04 | 0.43500E+04 |
| 76  | 1.5000001 | 0.39016E+04 | 0.43000E+04 |
| 77  | 1.5200001 | 0.38164E+04 | 0.42600E+04 |
| 78  | 1.5400001 | 0.37322E+04 | 0.42100E+04 |
| 79  | 1.5600001 | 0.36490E+04 | 0.41600E+04 |
| 80  | 1.5800001 | 0.35666E+04 | 0.41200E+04 |
| 81  | 1.6000001 | 0.34852E+04 | 0.40700E+04 |
| 82  | 1.6200001 | 0.34048E+04 | 0.40200E+04 |
| 83  | 1.6400001 | 0.33254E+04 | 0.39700E+04 |
| 84  | 1.6600001 | 0.32468E+04 | 0.39300E+04 |
| 85  | 1.6800001 | 0.31692E+04 | 0.38800E+04 |
| 86  | 1.7000001 | 0.30926E+04 | 0.38300E+04 |
| 87  | 1.7200001 | 0.30168E+04 | 0.37900E+04 |
| 88  | 1.7400001 | 0.29420E+04 | 0.37400E+04 |
| 89  | 1.7600001 | 0.28682E+04 | 0.36900E+04 |
| 90  | 1.7800001 | 0.27954E+04 | 0.36400E+04 |
| 91  | 1.8000001 | 0.27234E+04 | 0.36000E+04 |
| 92  | 1.8200001 | 0.26524E+04 | 0.35500E+04 |
| 93  | 1.8400001 | 0.25824E+04 | 0.35000E+04 |
| 94  | 1.8600001 | 0.25134E+04 | 0.34500E+04 |
| 95  | 1.8800001 | 0.24452E+04 | 0.34100E+04 |
| 96  | 1.9000001 | 0.23780E+04 | 0.33600E+04 |
| 97  | 1.9200001 | 0.23118E+04 | 0.33100E+04 |
| 98  | 1.9400001 | 0.22464E+04 | 0.32700E+04 |
| 99  | 1.9600001 | 0.21820E+04 | 0.32200E+04 |
| 100 | 1.9800001 | 0.21186E+04 | 0.31700E+04 |
| 101 | 2.0000001 | 0.20562E+04 | 0.31200E+04 |
| 102 | 2.0200001 | 0.19946E+04 | 0.30800E+04 |
| 103 | 2.0400001 | 0.19340E+04 | 0.30300E+04 |
| 104 | 2.0600001 | 0.18744E+04 | 0.29800E+04 |
| 105 | 2.0800001 | 0.18156E+04 | 0.29400E+04 |
| 106 | 2.1000001 | 0.17578E+04 | 0.28900E+04 |
| 107 | 2.1200001 | 0.17010E+04 | 0.28400E+04 |
| 108 | 2.1400001 | 0.16452E+04 | 0.27900E+04 |
| 109 | 2.1600001 | 0.15902E+04 | 0.27500E+04 |
| 110 | 2.1800001 | 0.15362E+04 | 0.27000E+04 |
| 111 | 2.2000001 | 0.14832E+04 | 0.26500E+04 |
| 112 | 2.2200001 | 0.14310E+04 | 0.26100E+04 |
| 113 | 2.2400001 | 0.13798E+04 | 0.25600E+04 |
| 114 | 2.2600001 | 0.13296E+04 | 0.25100E+04 |
| 115 | 2.2800001 | 0.12804E+04 | 0.24600E+04 |
| 116 | 2.3000001 | 0.12320E+04 | 0.24200E+04 |
| 117 | 2.3200001 | 0.11846E+04 | 0.23700E+04 |
| 118 | 2.3400001 | 0.11382E+04 | 0.23200E+04 |
| 119 | 2.3600001 | 0.10926E+04 | 0.22800E+04 |
| 120 | 2.3800001 | 0.10480E+04 | 0.22300E+04 |
| 121 | 2.4000001 | 0.10044E+04 | 0.21800E+04 |
| 122 | 2.4200001 | 0.96177E+03 | 0.21300E+04 |
| 123 | 2.4400001 | 0.91997E+03 | 0.20900E+04 |
| 124 | 2.4600001 | 0.87917E+03 | 0.20400E+04 |
| 125 | 2.4800001 | 0.83937E+03 | 0.19900E+04 |
| 126 | 2.5000001 | 0.80037E+03 | 0.19500E+04 |
| 127 | 2.5200001 | 0.76237E+03 | 0.19000E+04 |

|     |           |             |             |
|-----|-----------|-------------|-------------|
| 128 | 2.5400001 | 0.72537E+03 | 0.18500E+04 |
| 129 | 2.5600001 | 0.68937E+03 | 0.18000E+04 |
| 130 | 2.5800001 | 0.65417E+03 | 0.17600E+04 |
| 131 | 2.6000001 | 0.61997E+03 | 0.17100E+04 |
| 132 | 2.6200001 | 0.58677E+03 | 0.16600E+04 |
| 133 | 2.6400001 | 0.55457E+03 | 0.16100E+04 |
| 134 | 2.6600001 | 0.52317E+03 | 0.15700E+04 |
| 135 | 2.6800001 | 0.49277E+03 | 0.15200E+04 |
| 136 | 2.7000001 | 0.46337E+03 | 0.14700E+04 |
| 137 | 2.7200001 | 0.43477E+03 | 0.14300E+04 |
| 138 | 2.7400001 | 0.40717E+03 | 0.13800E+04 |
| 139 | 2.7600001 | 0.38057E+03 | 0.13300E+04 |
| 140 | 2.7800001 | 0.35497E+03 | 0.12800E+04 |
| 141 | 2.8000001 | 0.33017E+03 | 0.12400E+04 |
| 142 | 2.8200001 | 0.30637E+03 | 0.11900E+04 |
| 143 | 2.8400001 | 0.28357E+03 | 0.11400E+04 |
| 144 | 2.8600001 | 0.26157E+03 | 0.11000E+04 |
| 145 | 2.8800001 | 0.24057E+03 | 0.10500E+04 |
| 146 | 2.9000001 | 0.22057E+03 | 0.10000E+04 |
| 147 | 2.9200001 | 0.20149E+03 | 0.95400E+03 |
| 148 | 2.9400001 | 0.18335E+03 | 0.90700E+03 |
| 149 | 2.9600001 | 0.16615E+03 | 0.86000E+03 |
| 150 | 2.9800001 | 0.14989E+03 | 0.81300E+03 |
| 151 | 3.0000001 | 0.13457E+03 | 0.76600E+03 |
| 152 | 3.0200001 | 0.12021E+03 | 0.71800E+03 |
| 153 | 3.0400001 | 0.10679E+03 | 0.67100E+03 |
| 154 | 3.0600001 | 0.94310E+02 | 0.62400E+03 |
| 155 | 3.0800001 | 0.82770E+02 | 0.57700E+03 |
| 156 | 3.1000001 | 0.72170E+02 | 0.53000E+03 |
| 157 | 3.1200001 | 0.62530E+02 | 0.48200E+03 |
| 158 | 3.1400001 | 0.53830E+02 | 0.43500E+03 |
| 159 | 3.1600001 | 0.46070E+02 | 0.38800E+03 |
| 160 | 3.1800001 | 0.39250E+02 | 0.34100E+03 |
| 161 | 3.2000001 | 0.33370E+02 | 0.29400E+03 |
| 162 | 3.2200001 | 0.28430E+02 | 0.24700E+03 |
| 163 | 3.2400001 | 0.24270E+02 | 0.20800E+03 |
| 164 | 3.2600001 | 0.20770E+02 | 0.17500E+03 |
| 165 | 3.2800001 | 0.17810E+02 | 0.14800E+03 |
| 166 | 3.3000001 | 0.15290E+02 | 0.12600E+03 |
| 167 | 3.3200001 | 0.13150E+02 | 0.10700E+03 |
| 168 | 3.3400001 | 0.11334E+02 | 0.90800E+02 |
| 169 | 3.3600001 | 0.97864E+01 | 0.77400E+02 |
| 170 | 3.3800001 | 0.84624E+01 | 0.66200E+02 |
| 171 | 3.4000001 | 0.73284E+01 | 0.56700E+02 |
| 172 | 3.4200001 | 0.63544E+01 | 0.48700E+02 |
| 173 | 3.4400001 | 0.55184E+01 | 0.41800E+02 |
| 174 | 3.4600001 | 0.47984E+01 | 0.36000E+02 |
| 175 | 3.4800001 | 0.41764E+01 | 0.31100E+02 |
| 176 | 3.5000001 | 0.36384E+01 | 0.26900E+02 |
| 177 | 3.5200001 | 0.31724E+01 | 0.23300E+02 |
| 178 | 3.5400001 | 0.27684E+01 | 0.20200E+02 |
| 179 | 3.5600001 | 0.24184E+01 | 0.17500E+02 |
| 180 | 3.5800001 | 0.21144E+01 | 0.15200E+02 |
| 181 | 3.6000001 | 0.18504E+01 | 0.13200E+02 |
| 182 | 3.6200001 | 0.16184E+01 | 0.11600E+02 |
| 183 | 3.6400001 | 0.14164E+01 | 0.10100E+02 |
| 184 | 3.6600001 | 0.12400E+01 | 0.88200E+01 |
| 185 | 3.6800001 | 0.10858E+01 | 0.77100E+01 |
| 186 | 3.7000001 | 0.95055E+00 | 0.67600E+01 |
| 187 | 3.7200001 | 0.83195E+00 | 0.59300E+01 |
| 188 | 3.7400001 | 0.72795E+00 | 0.52000E+01 |
| 189 | 3.7600001 | 0.63655E+00 | 0.45700E+01 |
| 190 | 3.7800001 | 0.55615E+00 | 0.40200E+01 |
| 191 | 3.8000001 | 0.48535E+00 | 0.35400E+01 |
| 192 | 3.8200001 | 0.42315E+00 | 0.31100E+01 |
| 193 | 3.8400001 | 0.36815E+00 | 0.27500E+01 |

|     |           |              |              |
|-----|-----------|--------------|--------------|
| 194 | 3.8600001 | 0.31975E+00  | 0.24200E+01  |
| 195 | 3.8800001 | 0.27695E+00  | 0.21400E+01  |
| 196 | 3.9000001 | 0.23915E+00  | 0.18900E+01  |
| 197 | 3.9200001 | 0.20555E+00  | 0.16800E+01  |
| 198 | 3.9400001 | 0.17615E+00  | 0.14700E+01  |
| 199 | 3.9600001 | 0.14995E+00  | 0.13100E+01  |
| 200 | 3.9800001 | 0.12675E+00  | 0.11600E+01  |
| 201 | 4.0000001 | 0.10635E+00  | 0.10200E+01  |
| 202 | 4.0200001 | 0.88232E-01  | 0.90600E+00  |
| 203 | 4.0400001 | 0.72132E-01  | 0.80500E+00  |
| 204 | 4.0600001 | 0.57812E-01  | 0.71600E+00  |
| 205 | 4.0800001 | 0.45272E-01  | 0.62700E+00  |
| 206 | 4.1000001 | 0.34132E-01  | 0.55700E+00  |
| 207 | 4.1200001 | 0.24312E-01  | 0.49100E+00  |
| 208 | 4.1400001 | 0.15592E-01  | 0.43600E+00  |
| 209 | 4.1600001 | 0.78323E-02  | 0.38800E+00  |
| 210 | 4.1800001 | 0.10323E-02  | 0.34000E+00  |
| 211 | 4.2000001 | -0.49276E-02 | 0.29800E+00  |
| 212 | 4.2200001 | -0.10308E-01 | 0.26900E+00  |
| 213 | 4.2400001 | -0.14988E-01 | 0.23400E+00  |
| 214 | 4.2600001 | -0.19048E-01 | 0.20300E+00  |
| 215 | 4.2800001 | -0.22748E-01 | 0.18500E+00  |
| 216 | 4.3000001 | -0.25928E-01 | 0.15900E+00  |
| 217 | 4.3200001 | -0.28648E-01 | 0.13600E+00  |
| 218 | 4.3400001 | -0.31148E-01 | 0.12500E+00  |
| 219 | 4.3600001 | -0.33248E-01 | 0.10500E+00  |
| 220 | 4.3800001 | -0.35204E-01 | 0.97800E-01  |
| 221 | 4.4000001 | -0.36734E-01 | 0.76500E-01  |
| 222 | 4.4200001 | -0.38066E-01 | 0.66600E-01  |
| 223 | 4.4400001 | -0.39320E-01 | 0.62700E-01  |
| 224 | 4.4600001 | -0.40316E-01 | 0.49800E-01  |
| 225 | 4.4800001 | -0.41076E-01 | 0.38000E-01  |
| 226 | 4.5000001 | -0.41710E-01 | 0.31700E-01  |
| 227 | 4.5200001 | -0.42236E-01 | 0.26300E-01  |
| 228 | 4.5400001 | -0.42726E-01 | 0.24500E-01  |
| 229 | 4.5600001 | -0.43170E-01 | 0.22200E-01  |
| 230 | 4.5800001 | -0.43438E-01 | 0.13400E-01  |
| 231 | 4.6000001 | -0.43638E-01 | 0.10000E-01  |
| 232 | 4.6200001 | -0.43837E-01 | 0.99500E-02  |
| 233 | 4.6400001 | -0.44024E-01 | 0.93900E-02  |
| 234 | 4.6600001 | -0.44065E-01 | 0.20100E-02  |
| 235 | 4.6800001 | -0.44062E-01 | -0.12200E-03 |
| 236 | 4.7000001 | -0.44021E-01 | -0.20700E-02 |
| 237 | 4.7200001 | -0.43945E-01 | -0.37700E-02 |
| 238 | 4.7400001 | -0.43839E-01 | -0.53200E-02 |
| 239 | 4.7600001 | -0.43704E-01 | -0.67400E-02 |
| 240 | 4.7800001 | -0.43544E-01 | -0.80100E-02 |
| 241 | 4.8000001 | -0.43359E-01 | -0.92300E-02 |
| 242 | 4.8200001 | -0.43151E-01 | -0.10400E-01 |
| 243 | 4.8400001 | -0.42923E-01 | -0.11400E-01 |
| 244 | 4.8600001 | -0.42677E-01 | -0.12300E-01 |
| 245 | 4.8800001 | -0.42411E-01 | -0.13300E-01 |
| 246 | 4.9000001 | -0.42125E-01 | -0.14300E-01 |
| 247 | 4.9200001 | -0.41823E-01 | -0.15100E-01 |
| 248 | 4.9400001 | -0.41501E-01 | -0.16100E-01 |
| 249 | 4.9600001 | -0.41159E-01 | -0.17100E-01 |
| 250 | 4.9800001 | -0.40797E-01 | -0.18100E-01 |
| 251 | 5.0000001 | -0.40415E-01 | -0.19100E-01 |
| 252 | 5.0200001 | -0.40031E-01 | -0.19200E-01 |
| 253 | 5.0400001 | -0.39651E-01 | -0.19000E-01 |
| 254 | 5.0600001 | -0.39275E-01 | -0.18800E-01 |
| 255 | 5.0800001 | -0.38903E-01 | -0.18600E-01 |
| 256 | 5.1000001 | -0.38549E-01 | -0.17700E-01 |
| 257 | 5.1200001 | -0.38213E-01 | -0.16800E-01 |
| 258 | 5.1400001 | -0.37921E-01 | -0.14600E-01 |
| 259 | 5.1600001 | -0.37671E-01 | -0.12500E-01 |

|     |            |              |              |
|-----|------------|--------------|--------------|
| 260 | 5.18000001 | -0.37439E-01 | -0.11600E-01 |
| 261 | 5.20000001 | -0.37227E-01 | -0.10600E-01 |
| 262 | 5.22000001 | -0.37019E-01 | -0.10400E-01 |
| 263 | 5.24000001 | -0.36811E-01 | -0.10400E-01 |
| 264 | 5.26000001 | -0.36605E-01 | -0.10300E-01 |
| 265 | 5.28000001 | -0.36399E-01 | -0.10300E-01 |
| 266 | 5.30000001 | -0.36195E-01 | -0.10200E-01 |
| 267 | 5.32000001 | -0.35993E-01 | -0.10100E-01 |
| 268 | 5.34000001 | -0.35791E-01 | -0.10100E-01 |
| 269 | 5.36000001 | -0.35591E-01 | -0.10000E-01 |
| 270 | 5.38000001 | -0.35392E-01 | -0.99600E-02 |
| 271 | 5.40000001 | -0.35194E-01 | -0.99000E-02 |
| 272 | 5.42000001 | -0.34997E-01 | -0.98700E-02 |
| 273 | 5.44000001 | -0.34800E-01 | -0.98500E-02 |
| 274 | 5.46000001 | -0.34603E-01 | -0.98200E-02 |
| 275 | 5.48000001 | -0.34407E-01 | -0.98000E-02 |
| 276 | 5.50000001 | -0.34212E-01 | -0.97800E-02 |
| 277 | 5.52000001 | -0.34017E-01 | -0.97500E-02 |
| 278 | 5.54000001 | -0.33822E-01 | -0.97300E-02 |
| 279 | 5.56000001 | -0.33628E-01 | -0.97000E-02 |
| 280 | 5.58000001 | -0.33435E-01 | -0.96800E-02 |
| 281 | 5.60000001 | -0.33241E-01 | -0.96600E-02 |
| 282 | 5.62000001 | -0.33049E-01 | -0.96300E-02 |
| 283 | 5.64000001 | -0.32857E-01 | -0.96000E-02 |
| 284 | 5.66000001 | -0.32669E-01 | -0.94000E-02 |
| 285 | 5.68000001 | -0.32485E-01 | -0.92000E-02 |
| 286 | 5.70000001 | -0.32305E-01 | -0.90000E-02 |
| 287 | 5.72000001 | -0.32129E-01 | -0.88000E-02 |
| 288 | 5.74000001 | -0.31957E-01 | -0.86000E-02 |
| 289 | 5.76000001 | -0.31789E-01 | -0.84000E-02 |
| 290 | 5.78000001 | -0.31625E-01 | -0.82000E-02 |
| 291 | 5.80000001 | -0.31465E-01 | -0.80000E-02 |
| 292 | 5.82000001 | -0.31309E-01 | -0.78000E-02 |
| 293 | 5.84000001 | -0.31157E-01 | -0.76000E-02 |
| 294 | 5.86000001 | -0.31014E-01 | -0.71200E-02 |
| 295 | 5.88000001 | -0.30878E-01 | -0.68400E-02 |
| 296 | 5.90000001 | -0.30745E-01 | -0.66200E-02 |
| 297 | 5.92000001 | -0.30613E-01 | -0.66000E-02 |
| 298 | 5.94000001 | -0.30482E-01 | -0.65800E-02 |
| 299 | 5.96000001 | -0.30350E-01 | -0.65600E-02 |
| 300 | 5.98000001 | -0.30220E-01 | -0.65400E-02 |
| 301 | 6.00000001 | -0.30089E-01 | -0.65200E-02 |
| 302 | 6.02000001 | -0.29959E-01 | -0.65000E-02 |
| 303 | 6.04000001 | -0.29830E-01 | -0.64800E-02 |
| 304 | 6.06000001 | -0.29700E-01 | -0.64600E-02 |
| 305 | 6.08000001 | -0.29572E-01 | -0.64400E-02 |
| 306 | 6.10000001 | -0.29443E-01 | -0.64200E-02 |
| 307 | 6.12000001 | -0.29315E-01 | -0.64000E-02 |
| 308 | 6.14000001 | -0.29188E-01 | -0.63800E-02 |
| 309 | 6.16000001 | -0.29060E-01 | -0.63600E-02 |
| 310 | 6.18000001 | -0.28934E-01 | -0.63200E-02 |
| 311 | 6.20000001 | -0.28814E-01 | -0.60200E-02 |
| 312 | 6.22000001 | -0.28699E-01 | -0.57200E-02 |
| 313 | 6.24000001 | -0.28591E-01 | -0.54200E-02 |
| 314 | 6.26000001 | -0.28488E-01 | -0.51200E-02 |
| 315 | 6.28000001 | -0.28390E-01 | -0.49300E-02 |
| 316 | 6.30000001 | -0.28292E-01 | -0.48700E-02 |
| 317 | 6.32000001 | -0.28196E-01 | -0.48100E-02 |
| 318 | 6.34000001 | -0.28101E-01 | -0.47500E-02 |
| 319 | 6.36000001 | -0.28007E-01 | -0.46900E-02 |
| 320 | 6.38000001 | -0.27915E-01 | -0.46300E-02 |
| 321 | 6.40000001 | -0.27823E-01 | -0.45700E-02 |
| 322 | 6.42000001 | -0.27733E-01 | -0.45100E-02 |
| 323 | 6.44000001 | -0.27644E-01 | -0.44500E-02 |
| 324 | 6.46000001 | -0.27556E-01 | -0.43900E-02 |
| 325 | 6.48000001 | -0.27470E-01 | -0.43300E-02 |

|     |           |              |              |
|-----|-----------|--------------|--------------|
| 326 | 6.5000001 | -0.27384E-01 | -0.42700E-02 |
| 327 | 6.5200001 | -0.27300E-01 | -0.42100E-02 |
| 328 | 6.5400001 | -0.27217E-01 | -0.41500E-02 |
| 329 | 6.5600001 | -0.27135E-01 | -0.40900E-02 |
| 330 | 6.5800001 | -0.27055E-01 | -0.40000E-02 |
| 331 | 6.6000001 | -0.26975E-01 | -0.40000E-02 |
| 332 | 6.6200001 | -0.26896E-01 | -0.39900E-02 |
| 333 | 6.6400001 | -0.26816E-01 | -0.39900E-02 |
| 334 | 6.6600001 | -0.26736E-01 | -0.39900E-02 |
| 335 | 6.6800001 | -0.26656E-01 | -0.39900E-02 |
| 336 | 6.7000001 | -0.26577E-01 | -0.39800E-02 |
| 337 | 6.7200001 | -0.26497E-01 | -0.39800E-02 |
| 338 | 6.7400001 | -0.26417E-01 | -0.39800E-02 |
| 339 | 6.7600001 | -0.26338E-01 | -0.39800E-02 |
| 340 | 6.7800001 | -0.26258E-01 | -0.39700E-02 |
| 341 | 6.8000001 | -0.26179E-01 | -0.39700E-02 |
| 342 | 6.8200001 | -0.26100E-01 | -0.39700E-02 |
| 343 | 6.8400001 | -0.26020E-01 | -0.39700E-02 |
| 344 | 6.8600001 | -0.25941E-01 | -0.39600E-02 |
| 345 | 6.8800001 | -0.25862E-01 | -0.39600E-02 |
| 346 | 6.9000001 | -0.25783E-01 | -0.39600E-02 |
| 347 | 6.9200001 | -0.25704E-01 | -0.39300E-02 |
| 348 | 6.9400001 | -0.25625E-01 | -0.39300E-02 |
| 349 | 6.9600001 | -0.25547E-01 | -0.39200E-02 |
| 350 | 6.9800001 | -0.25469E-01 | -0.39200E-02 |
| 351 | 7.0000001 | -0.25390E-01 | -0.39100E-02 |
| 352 | 7.0200001 | -0.25312E-01 | -0.39100E-02 |
| 353 | 7.0400001 | -0.25234E-01 | -0.39000E-02 |
| 354 | 7.0600001 | -0.25156E-01 | -0.39000E-02 |
| 355 | 7.0800001 | -0.25078E-01 | -0.38900E-02 |
| 356 | 7.1000001 | -0.25001E-01 | -0.38900E-02 |
| 357 | 7.1200001 | -0.24923E-01 | -0.38800E-02 |
| 358 | 7.1400001 | -0.24845E-01 | -0.38800E-02 |
| 359 | 7.1600001 | -0.24768E-01 | -0.38700E-02 |
| 360 | 7.1800001 | -0.24691E-01 | -0.38600E-02 |
| 361 | 7.2000001 | -0.24613E-01 | -0.38800E-02 |
| 362 | 7.2200001 | -0.24535E-01 | -0.38900E-02 |
| 363 | 7.2400001 | -0.24457E-01 | -0.39000E-02 |
| 364 | 7.2600001 | -0.24379E-01 | -0.39100E-02 |
| 365 | 7.2800001 | -0.24301E-01 | -0.39200E-02 |
| 366 | 7.3000001 | -0.24222E-01 | -0.39400E-02 |
| 367 | 7.3200001 | -0.24143E-01 | -0.39500E-02 |
| 368 | 7.3400001 | -0.24064E-01 | -0.39600E-02 |
| 369 | 7.3600001 | -0.23984E-01 | -0.39700E-02 |
| 370 | 7.3800001 | -0.23905E-01 | -0.39900E-02 |
| 371 | 7.4000001 | -0.23825E-01 | -0.40000E-02 |
| 372 | 7.4200001 | -0.23744E-01 | -0.40100E-02 |
| 373 | 7.4400001 | -0.23664E-01 | -0.40200E-02 |
| 374 | 7.4600001 | -0.23583E-01 | -0.40400E-02 |
| 375 | 7.4800001 | -0.23502E-01 | -0.40500E-02 |
| 376 | 7.5000001 | -0.23421E-01 | -0.40600E-02 |
| 377 | 7.5200001 | -0.23340E-01 | -0.40700E-02 |
| 378 | 7.5400001 | -0.23258E-01 | -0.40900E-02 |
| 379 | 7.5600001 | -0.23176E-01 | -0.41000E-02 |
| 380 | 7.5800001 | -0.23094E-01 | -0.41100E-02 |
| 381 | 7.6000001 | -0.23011E-01 | -0.41200E-02 |
| 382 | 7.6200001 | -0.22928E-01 | -0.41400E-02 |
| 383 | 7.6400001 | -0.22845E-01 | -0.41500E-02 |
| 384 | 7.6600001 | -0.22762E-01 | -0.41600E-02 |
| 385 | 7.6800001 | -0.22679E-01 | -0.41700E-02 |
| 386 | 7.7000001 | -0.22595E-01 | -0.41900E-02 |
| 387 | 7.7200001 | -0.22511E-01 | -0.42000E-02 |
| 388 | 7.7400001 | -0.22427E-01 | -0.42100E-02 |
| 389 | 7.7600001 | -0.22342E-01 | -0.42200E-02 |
| 390 | 7.7800001 | -0.22258E-01 | -0.42300E-02 |
| 391 | 7.8000001 | -0.22173E-01 | -0.42500E-02 |

|     |           |              |              |
|-----|-----------|--------------|--------------|
| 392 | 7.8200001 | -0.22088E-01 | -0.42600E-02 |
| 393 | 7.8400001 | -0.22002E-01 | -0.42700E-02 |
| 394 | 7.8600001 | -0.21917E-01 | -0.42800E-02 |
| 395 | 7.8800001 | -0.21831E-01 | -0.43000E-02 |
| 396 | 7.9000001 | -0.21744E-01 | -0.43100E-02 |
| 397 | 7.9200001 | -0.21658E-01 | -0.43200E-02 |
| 398 | 7.9400001 | -0.21571E-01 | -0.43300E-02 |
| 399 | 7.9600001 | -0.21484E-01 | -0.43500E-02 |
| 400 | 7.9800001 | -0.21397E-01 | -0.43600E-02 |
| 401 | 8.0000001 | -0.21310E-01 | -0.43700E-02 |
| 402 | 8.0200001 | -0.21222E-01 | -0.43800E-02 |
| 403 | 8.0400001 | -0.21134E-01 | -0.44000E-02 |
| 404 | 8.0600001 | -0.21046E-01 | -0.44100E-02 |
| 405 | 8.0800001 | -0.20958E-01 | -0.44200E-02 |
| 406 | 8.1000001 | -0.20869E-01 | -0.44300E-02 |
| 407 | 8.1200001 | -0.20780E-01 | -0.44500E-02 |
| 408 | 8.1400001 | -0.20691E-01 | -0.44600E-02 |
| 409 | 8.1600001 | -0.20601E-01 | -0.44700E-02 |
| 410 | 8.1800001 | -0.20512E-01 | -0.44800E-02 |
| 411 | 8.2000001 | -0.20422E-01 | -0.45000E-02 |
| 412 | 8.2200001 | -0.20332E-01 | -0.45100E-02 |
| 413 | 8.2400001 | -0.20241E-01 | -0.45200E-02 |
| 414 | 8.2600001 | -0.20151E-01 | -0.45300E-02 |
| 415 | 8.2800001 | -0.20060E-01 | -0.45400E-02 |
| 416 | 8.3000001 | -0.19969E-01 | -0.45600E-02 |
| 417 | 8.3200001 | -0.19877E-01 | -0.45700E-02 |
| 418 | 8.3400001 | -0.19786E-01 | -0.45800E-02 |
| 419 | 8.3600001 | -0.19694E-01 | -0.45900E-02 |
| 420 | 8.3800001 | -0.19602E-01 | -0.46100E-02 |
| 421 | 8.4000001 | -0.19509E-01 | -0.46200E-02 |
| 422 | 8.4200001 | -0.19417E-01 | -0.46300E-02 |
| 423 | 8.4400001 | -0.19324E-01 | -0.46400E-02 |
| 424 | 8.4600001 | -0.19231E-01 | -0.46600E-02 |
| 425 | 8.4800001 | -0.19137E-01 | -0.46700E-02 |
| 426 | 8.5000001 | -0.19044E-01 | -0.46800E-02 |
| 427 | 8.5200001 | -0.18950E-01 | -0.46900E-02 |
| 428 | 8.5400001 | -0.18856E-01 | -0.47100E-02 |
| 429 | 8.5600001 | -0.18761E-01 | -0.47200E-02 |
| 430 | 8.5800001 | -0.18667E-01 | -0.47300E-02 |
| 431 | 8.6000001 | -0.18572E-01 | -0.47400E-02 |
| 432 | 8.6200001 | -0.18477E-01 | -0.47600E-02 |
| 433 | 8.6400001 | -0.18381E-01 | -0.47700E-02 |
| 434 | 8.6600001 | -0.18286E-01 | -0.47800E-02 |
| 435 | 8.6800001 | -0.18190E-01 | -0.47900E-02 |
| 436 | 8.7000001 | -0.18094E-01 | -0.48100E-02 |
| 437 | 8.7200001 | -0.17997E-01 | -0.48200E-02 |
| 438 | 8.7400001 | -0.17901E-01 | -0.48300E-02 |
| 439 | 8.7600001 | -0.17804E-01 | -0.48400E-02 |
| 440 | 8.7800001 | -0.17707E-01 | -0.48500E-02 |
| 441 | 8.8000001 | -0.17609E-01 | -0.48700E-02 |
| 442 | 8.8200001 | -0.17512E-01 | -0.48800E-02 |
| 443 | 8.8400001 | -0.17414E-01 | -0.48900E-02 |
| 444 | 8.8600001 | -0.17316E-01 | -0.49000E-02 |
| 445 | 8.8800001 | -0.17218E-01 | -0.49200E-02 |
| 446 | 8.9000001 | -0.17119E-01 | -0.49300E-02 |
| 447 | 8.9200001 | -0.17020E-01 | -0.49400E-02 |
| 448 | 8.9400001 | -0.16921E-01 | -0.49500E-02 |
| 449 | 8.9600001 | -0.16822E-01 | -0.49700E-02 |
| 450 | 8.9800001 | -0.16722E-01 | -0.49800E-02 |
| 451 | 9.0000001 | -0.16622E-01 | -0.49900E-02 |
| 452 | 9.0200001 | -0.16522E-01 | -0.50000E-02 |
| 453 | 9.0400001 | -0.16422E-01 | -0.50200E-02 |
| 454 | 9.0600001 | -0.16321E-01 | -0.50300E-02 |
| 455 | 9.0800001 | -0.16221E-01 | -0.50400E-02 |
| 456 | 9.1000001 | -0.16120E-01 | -0.50500E-02 |
| 457 | 9.1200001 | -0.16018E-01 | -0.50700E-02 |

|     |            |              |              |
|-----|------------|--------------|--------------|
| 458 | 9.1400001  | -0.15917E-01 | -0.50800E-02 |
| 459 | 9.1600001  | -0.15815E-01 | -0.50900E-02 |
| 460 | 9.1800001  | -0.15713E-01 | -0.51000E-02 |
| 461 | 9.2000001  | -0.15610E-01 | -0.51200E-02 |
| 462 | 9.2200001  | -0.15508E-01 | -0.51300E-02 |
| 463 | 9.2400001  | -0.15405E-01 | -0.51400E-02 |
| 464 | 9.2600001  | -0.15302E-01 | -0.51500E-02 |
| 465 | 9.2800001  | -0.15199E-01 | -0.51600E-02 |
| 466 | 9.3000001  | -0.15095E-01 | -0.51800E-02 |
| 467 | 9.3200001  | -0.14991E-01 | -0.51900E-02 |
| 468 | 9.3400001  | -0.14887E-01 | -0.52000E-02 |
| 469 | 9.3600001  | -0.14783E-01 | -0.52100E-02 |
| 470 | 9.3800001  | -0.14679E-01 | -0.52300E-02 |
| 471 | 9.4000001  | -0.14574E-01 | -0.52400E-02 |
| 472 | 9.4200001  | -0.14469E-01 | -0.52500E-02 |
| 473 | 9.4400001  | -0.14364E-01 | -0.52600E-02 |
| 474 | 9.4600001  | -0.14258E-01 | -0.52800E-02 |
| 475 | 9.4800001  | -0.14152E-01 | -0.52900E-02 |
| 476 | 9.5000001  | -0.14046E-01 | -0.53000E-02 |
| 477 | 9.5200001  | -0.13940E-01 | -0.53100E-02 |
| 478 | 9.5400001  | -0.13833E-01 | -0.53300E-02 |
| 479 | 9.5600001  | -0.13727E-01 | -0.53400E-02 |
| 480 | 9.5800001  | -0.13620E-01 | -0.53500E-02 |
| 481 | 9.6000001  | -0.13512E-01 | -0.53600E-02 |
| 482 | 9.6200001  | -0.13405E-01 | -0.53800E-02 |
| 483 | 9.6400001  | -0.13297E-01 | -0.53900E-02 |
| 484 | 9.6600001  | -0.13189E-01 | -0.54000E-02 |
| 485 | 9.6800001  | -0.13081E-01 | -0.54100E-02 |
| 486 | 9.7000001  | -0.12972E-01 | -0.54300E-02 |
| 487 | 9.7200001  | -0.12863E-01 | -0.54400E-02 |
| 488 | 9.7400001  | -0.12754E-01 | -0.54900E-02 |
| 489 | 9.7600001  | -0.12643E-01 | -0.55100E-02 |
| 490 | 9.7800001  | -0.12533E-01 | -0.55300E-02 |
| 491 | 9.8000001  | -0.12422E-01 | -0.55500E-02 |
| 492 | 9.8200001  | -0.12311E-01 | -0.55600E-02 |
| 493 | 9.8400001  | -0.12199E-01 | -0.55800E-02 |
| 494 | 9.8600001  | -0.12087E-01 | -0.56000E-02 |
| 495 | 9.8800001  | -0.11975E-01 | -0.56200E-02 |
| 496 | 9.9000001  | -0.11862E-01 | -0.56400E-02 |
| 497 | 9.9200001  | -0.11749E-01 | -0.56600E-02 |
| 498 | 9.9400001  | -0.11635E-01 | -0.56800E-02 |
| 499 | 9.9600001  | -0.11521E-01 | -0.57000E-02 |
| 500 | 9.9800001  | -0.11407E-01 | -0.57100E-02 |
| 501 | 10.0000001 | -0.11292E-01 | -0.57300E-02 |
| 502 | 10.0200001 | -0.11177E-01 | -0.57500E-02 |
| 503 | 10.0400001 | -0.11062E-01 | -0.57700E-02 |
| 504 | 10.0600001 | -0.10946E-01 | -0.57900E-02 |
| 505 | 10.0800001 | -0.10830E-01 | -0.58100E-02 |
| 506 | 10.1000001 | -0.10713E-01 | -0.58300E-02 |
| 507 | 10.1200001 | -0.10596E-01 | -0.58400E-02 |
| 508 | 10.1400001 | -0.10479E-01 | -0.58600E-02 |
| 509 | 10.1600001 | -0.10362E-01 | -0.58800E-02 |
| 510 | 10.1800001 | -0.10244E-01 | -0.59000E-02 |
| 511 | 10.2000001 | -0.10125E-01 | -0.59200E-02 |
| 512 | 10.2200001 | -0.10006E-01 | -0.59400E-02 |
| 513 | 10.2400001 | -0.98872E-02 | -0.59600E-02 |
| 514 | 10.2600001 | -0.97676E-02 | -0.59800E-02 |
| 515 | 10.2800001 | -0.96478E-02 | -0.59900E-02 |
| 516 | 10.3000001 | -0.95276E-02 | -0.60100E-02 |
| 517 | 10.3200001 | -0.94070E-02 | -0.60300E-02 |
| 518 | 10.3400001 | -0.92860E-02 | -0.60500E-02 |
| 519 | 10.3600001 | -0.91646E-02 | -0.60700E-02 |
| 520 | 10.3800001 | -0.90428E-02 | -0.60900E-02 |
| 521 | 10.4000001 | -0.89206E-02 | -0.61100E-02 |
| 522 | 10.4200001 | -0.87980E-02 | -0.61300E-02 |
| 523 | 10.4400001 | -0.86752E-02 | -0.61400E-02 |



|     |            |              |              |
|-----|------------|--------------|--------------|
| 524 | 10.4600001 | -0.85520E-02 | -0.61600E-02 |
| 525 | 10.4800001 | -0.84284E-02 | -0.61800E-02 |
| 526 | 10.5000001 | -0.83044E-02 | -0.62000E-02 |
| 527 | 10.5200001 | -0.81800E-02 | -0.62200E-02 |
| 528 | 10.5400001 | -0.80552E-02 | -0.62400E-02 |
| 529 | 10.5600001 | -0.79300E-02 | -0.62600E-02 |
| 530 | 10.5800001 | -0.78046E-02 | -0.62700E-02 |
| 531 | 10.6000001 | -0.76788E-02 | -0.62900E-02 |
| 532 | 10.6200001 | -0.75526E-02 | -0.63100E-02 |
| 533 | 10.6400001 | -0.74260E-02 | -0.63300E-02 |
| 534 | 10.6600001 | -0.72990E-02 | -0.63500E-02 |
| 535 | 10.6800001 | -0.71718E-02 | -0.63600E-02 |
| 536 | 10.7000001 | -0.70442E-02 | -0.63800E-02 |
| 537 | 10.7200001 | -0.69160E-02 | -0.64100E-02 |
| 538 | 10.7400001 | -0.67874E-02 | -0.64300E-02 |
| 539 | 10.7600001 | -0.66584E-02 | -0.64500E-02 |
| 540 | 10.7800001 | -0.65290E-02 | -0.64700E-02 |
| 541 | 10.8000001 | -0.63992E-02 | -0.64900E-02 |
| 542 | 10.8200001 | -0.62690E-02 | -0.65100E-02 |
| 543 | 10.8400001 | -0.61382E-02 | -0.65400E-02 |
| 544 | 10.8600001 | -0.60070E-02 | -0.65600E-02 |
| 545 | 10.8800001 | -0.58754E-02 | -0.65800E-02 |
| 546 | 10.9000001 | -0.57434E-02 | -0.66000E-02 |
| 547 | 10.9200001 | -0.56110E-02 | -0.66200E-02 |
| 548 | 10.9400001 | -0.54780E-02 | -0.66500E-02 |
| 549 | 10.9600001 | -0.53446E-02 | -0.66700E-02 |
| 550 | 10.9800001 | -0.52108E-02 | -0.66900E-02 |
| 551 | 11.0000001 | -0.50766E-02 | -0.67100E-02 |
| 552 | 11.0200001 | -0.49420E-02 | -0.67300E-02 |
| 553 | 11.0400001 | -0.48070E-02 | -0.67500E-02 |
| 554 | 11.0600001 | -0.46714E-02 | -0.67800E-02 |
| 555 | 11.0800001 | -0.45354E-02 | -0.68000E-02 |
| 556 | 11.1000001 | -0.43990E-02 | -0.68200E-02 |
| 557 | 11.1200001 | -0.42622E-02 | -0.68400E-02 |
| 558 | 11.1400001 | -0.41250E-02 | -0.68600E-02 |
| 559 | 11.1600001 | -0.39874E-02 | -0.68800E-02 |
| 560 | 11.1800001 | -0.38492E-02 | -0.69100E-02 |
| 561 | 11.2000001 | -0.37106E-02 | -0.69300E-02 |
| 562 | 11.2200001 | -0.35716E-02 | -0.69500E-02 |
| 563 | 11.2400001 | -0.34322E-02 | -0.69700E-02 |
| 564 | 11.2600001 | -0.32924E-02 | -0.69900E-02 |
| 565 | 11.2800001 | -0.31522E-02 | -0.70100E-02 |
| 566 | 11.3000001 | -0.30114E-02 | -0.70400E-02 |
| 567 | 11.3200001 | -0.28702E-02 | -0.70600E-02 |
| 568 | 11.3400001 | -0.27286E-02 | -0.70800E-02 |
| 569 | 11.3600001 | -0.25866E-02 | -0.71000E-02 |
| 570 | 11.3800001 | -0.24446E-02 | -0.71000E-02 |
| 571 | 11.4000001 | -0.23026E-02 | -0.71000E-02 |
| 572 | 11.4200001 | -0.21606E-02 | -0.71000E-02 |
| 573 | 11.4400001 | -0.20186E-02 | -0.71000E-02 |
| 574 | 11.4600001 | -0.18766E-02 | -0.71000E-02 |
| 575 | 11.4800001 | -0.17346E-02 | -0.71000E-02 |
| 576 | 11.5000001 | -0.15926E-02 | -0.71000E-02 |
| 577 | 11.5200001 | -0.14506E-02 | -0.71000E-02 |
| 578 | 11.5400001 | -0.13086E-02 | -0.71000E-02 |
| 579 | 11.5600001 | -0.11666E-02 | -0.71000E-02 |
| 580 | 11.5800001 | -0.10246E-02 | -0.71000E-02 |
| 581 | 11.6000001 | -0.88261E-03 | -0.71000E-02 |
| 582 | 11.6200001 | -0.74061E-03 | -0.71000E-02 |
| 583 | 11.6400001 | -0.59861E-03 | -0.71000E-02 |
| 584 | 11.6600001 | -0.46341E-03 | -0.67600E-02 |
| 585 | 11.6800001 | -0.33501E-03 | -0.64200E-02 |
| 586 | 11.7000001 | -0.21341E-03 | -0.60800E-02 |
| 587 | 11.7200001 | -0.98610E-04 | -0.57400E-02 |
| 588 | 11.7400001 | -0.98610E-04 | 0.00000E+00  |
| 589 | 11.7600001 | -0.98610E-04 | 0.00000E+00  |

|     |            |              |              |
|-----|------------|--------------|--------------|
| 590 | 11.7800001 | 0.000000E+00 | 0.000000E+00 |
| 591 | 11.8000001 | 0.000000E+00 | 0.000000E+00 |
| 592 | 11.8200001 | 0.000000E+00 | 0.000000E+00 |
| 593 | 11.8400001 | 0.000000E+00 | 0.000000E+00 |
| 594 | 11.8600001 | 0.000000E+00 | 0.000000E+00 |
| 595 | 11.8800001 | 0.000000E+00 | 0.000000E+00 |
| 596 | 11.9000001 | 0.000000E+00 | 0.000000E+00 |
| 597 | 11.9200001 | 0.000000E+00 | 0.000000E+00 |
| 598 | 11.9400001 | 0.000000E+00 | 0.000000E+00 |
| 599 | 11.9600001 | 0.000000E+00 | 0.000000E+00 |
| 600 | 11.9800001 | 0.000000E+00 | 0.000000E+00 |
