# Supplementary material
Source: MDPI journal article supplement (https://www.mdpi.com/2226-4310/5/1/1)
Supplement: s1 [file s1]

# Tabulated potential for E1-E1

E1-E1

N 600 R 0.0000001 11.9800001

|    |           |             |             |
|----|-----------|-------------|-------------|
| 1  | 0.0000001 | 0.10722E+05 | 0.85100E+04 |
| 2  | 0.0200001 | 0.10553E+05 | 0.84400E+04 |
| 3  | 0.0400001 | 0.10386E+05 | 0.83700E+04 |
| 4  | 0.0600001 | 0.10219E+05 | 0.83100E+04 |
| 5  | 0.0800001 | 0.10055E+05 | 0.82400E+04 |
| 6  | 0.1000001 | 0.98912E+04 | 0.81700E+04 |
| 7  | 0.1200001 | 0.97292E+04 | 0.81000E+04 |
| 8  | 0.1400001 | 0.95684E+04 | 0.80400E+04 |
| 9  | 0.1600001 | 0.94090E+04 | 0.79700E+04 |
| 10 | 0.1800001 | 0.92510E+04 | 0.79000E+04 |
| 11 | 0.2000001 | 0.90942E+04 | 0.78400E+04 |
| 12 | 0.2200001 | 0.89388E+04 | 0.77700E+04 |
| 13 | 0.2400001 | 0.87848E+04 | 0.77000E+04 |
| 14 | 0.2600001 | 0.86322E+04 | 0.76300E+04 |
| 15 | 0.2800001 | 0.84808E+04 | 0.75700E+04 |
| 16 | 0.3000001 | 0.83308E+04 | 0.75000E+04 |
| 17 | 0.3200001 | 0.81822E+04 | 0.74300E+04 |
| 18 | 0.3400001 | 0.80348E+04 | 0.73700E+04 |
| 19 | 0.3600001 | 0.78888E+04 | 0.73000E+04 |
| 20 | 0.3800001 | 0.77442E+04 | 0.72300E+04 |
| 21 | 0.4000001 | 0.76008E+04 | 0.71700E+04 |
| 22 | 0.4200001 | 0.74588E+04 | 0.71000E+04 |
| 23 | 0.4400001 | 0.73182E+04 | 0.70300E+04 |
| 24 | 0.4600001 | 0.71790E+04 | 0.69600E+04 |
| 25 | 0.4800001 | 0.70410E+04 | 0.69000E+04 |
| 26 | 0.5000001 | 0.69044E+04 | 0.68300E+04 |
| 27 | 0.5200001 | 0.67692E+04 | 0.67600E+04 |
| 28 | 0.5400001 | 0.66352E+04 | 0.67000E+04 |
| 29 | 0.5600001 | 0.65026E+04 | 0.66300E+04 |
| 30 | 0.5800001 | 0.63714E+04 | 0.65600E+04 |
| 31 | 0.6000001 | 0.62416E+04 | 0.64900E+04 |
| 32 | 0.6200001 | 0.61130E+04 | 0.64300E+04 |
| 33 | 0.6400001 | 0.59858E+04 | 0.63600E+04 |
| 34 | 0.6600001 | 0.58600E+04 | 0.62900E+04 |
| 35 | 0.6800001 | 0.57354E+04 | 0.62300E+04 |
| 36 | 0.7000001 | 0.56122E+04 | 0.61600E+04 |
| 37 | 0.7200001 | 0.54904E+04 | 0.60900E+04 |
| 38 | 0.7400001 | 0.53698E+04 | 0.60300E+04 |
| 39 | 0.7600001 | 0.52506E+04 | 0.59600E+04 |
| 40 | 0.7800001 | 0.51328E+04 | 0.58900E+04 |
| 41 | 0.8000001 | 0.50164E+04 | 0.58200E+04 |
| 42 | 0.8200001 | 0.49012E+04 | 0.57600E+04 |
| 43 | 0.8400001 | 0.47874E+04 | 0.56900E+04 |
| 44 | 0.8600001 | 0.46750E+04 | 0.56200E+04 |
| 45 | 0.8800001 | 0.45638E+04 | 0.55600E+04 |
| 46 | 0.9000001 | 0.44540E+04 | 0.54900E+04 |
| 47 | 0.9200001 | 0.43456E+04 | 0.54200E+04 |
| 48 | 0.9400001 | 0.42384E+04 | 0.53600E+04 |
| 49 | 0.9600001 | 0.41326E+04 | 0.52900E+04 |
| 50 | 0.9800001 | 0.40282E+04 | 0.52200E+04 |
| 51 | 1.0000001 | 0.39252E+04 | 0.51500E+04 |
| 52 | 1.0200001 | 0.38234E+04 | 0.50900E+04 |
| 53 | 1.0400001 | 0.37230E+04 | 0.50200E+04 |
| 54 | 1.0600001 | 0.36240E+04 | 0.49500E+04 |
| 55 | 1.0800001 | 0.35262E+04 | 0.48900E+04 |
| 56 | 1.1000001 | 0.34298E+04 | 0.48200E+04 |
| 57 | 1.1200001 | 0.33348E+04 | 0.47500E+04 |
| 58 | 1.1400001 | 0.32412E+04 | 0.46800E+04 |
| 59 | 1.1600001 | 0.31488E+04 | 0.46200E+04 |
| 60 | 1.1800001 | 0.30578E+04 | 0.45500E+04 |
| 61 | 1.2000001 | 0.29682E+04 | 0.44800E+04 |

|     |           |             |             |
|-----|-----------|-------------|-------------|
| 62  | 1.2200001 | 0.28798E+04 | 0.44200E+04 |
| 63  | 1.2400001 | 0.27928E+04 | 0.43500E+04 |
| 64  | 1.2600001 | 0.27072E+04 | 0.42800E+04 |
| 65  | 1.2800001 | 0.26228E+04 | 0.42200E+04 |
| 66  | 1.3000001 | 0.25398E+04 | 0.41500E+04 |
| 67  | 1.3200001 | 0.24582E+04 | 0.40800E+04 |
| 68  | 1.3400001 | 0.23780E+04 | 0.40100E+04 |
| 69  | 1.3600001 | 0.22990E+04 | 0.39500E+04 |
| 70  | 1.3800001 | 0.22214E+04 | 0.38800E+04 |
| 71  | 1.4000001 | 0.21452E+04 | 0.38100E+04 |
| 72  | 1.4200001 | 0.20702E+04 | 0.37500E+04 |
| 73  | 1.4400001 | 0.19966E+04 | 0.36800E+04 |
| 74  | 1.4600001 | 0.19244E+04 | 0.36100E+04 |
| 75  | 1.4800001 | 0.18536E+04 | 0.35400E+04 |
| 76  | 1.5000001 | 0.17840E+04 | 0.34800E+04 |
| 77  | 1.5200001 | 0.17158E+04 | 0.34100E+04 |
| 78  | 1.5400001 | 0.16490E+04 | 0.33400E+04 |
| 79  | 1.5600001 | 0.15834E+04 | 0.32800E+04 |
| 80  | 1.5800001 | 0.15192E+04 | 0.32100E+04 |
| 81  | 1.6000001 | 0.14564E+04 | 0.31400E+04 |
| 82  | 1.6200001 | 0.13948E+04 | 0.30800E+04 |
| 83  | 1.6400001 | 0.13346E+04 | 0.30100E+04 |
| 84  | 1.6600001 | 0.12758E+04 | 0.29400E+04 |
| 85  | 1.6800001 | 0.12184E+04 | 0.28700E+04 |
| 86  | 1.7000001 | 0.11622E+04 | 0.28100E+04 |
| 87  | 1.7200001 | 0.11074E+04 | 0.27400E+04 |
| 88  | 1.7400001 | 0.10540E+04 | 0.26700E+04 |
| 89  | 1.7600001 | 0.10018E+04 | 0.26100E+04 |
| 90  | 1.7800001 | 0.95099E+03 | 0.25400E+04 |
| 91  | 1.8000001 | 0.90159E+03 | 0.24700E+04 |
| 92  | 1.8200001 | 0.85359E+03 | 0.24000E+04 |
| 93  | 1.8400001 | 0.80679E+03 | 0.23400E+04 |
| 94  | 1.8600001 | 0.76139E+03 | 0.22700E+04 |
| 95  | 1.8800001 | 0.71739E+03 | 0.22000E+04 |
| 96  | 1.9000001 | 0.67459E+03 | 0.21400E+04 |
| 97  | 1.9200001 | 0.63319E+03 | 0.20700E+04 |
| 98  | 1.9400001 | 0.59319E+03 | 0.20000E+04 |
| 99  | 1.9600001 | 0.55439E+03 | 0.19400E+04 |
| 100 | 1.9800001 | 0.51699E+03 | 0.18700E+04 |
| 101 | 2.0000001 | 0.48099E+03 | 0.18000E+04 |
| 102 | 2.0200001 | 0.44639E+03 | 0.17300E+04 |
| 103 | 2.0400001 | 0.41299E+03 | 0.16700E+04 |
| 104 | 2.0600001 | 0.38099E+03 | 0.16000E+04 |
| 105 | 2.0800001 | 0.35039E+03 | 0.15300E+04 |
| 106 | 2.1000001 | 0.32099E+03 | 0.14700E+04 |
| 107 | 2.1200001 | 0.29299E+03 | 0.14000E+04 |
| 108 | 2.1400001 | 0.26639E+03 | 0.13300E+04 |
| 109 | 2.1600001 | 0.24119E+03 | 0.12600E+04 |
| 110 | 2.1800001 | 0.21719E+03 | 0.12000E+04 |
| 111 | 2.2000001 | 0.19459E+03 | 0.11300E+04 |
| 112 | 2.2200001 | 0.17339E+03 | 0.10600E+04 |
| 113 | 2.2400001 | 0.15345E+03 | 0.99700E+03 |
| 114 | 2.2600001 | 0.13485E+03 | 0.93000E+03 |
| 115 | 2.2800001 | 0.11759E+03 | 0.86300E+03 |
| 116 | 2.3000001 | 0.10167E+03 | 0.79600E+03 |
| 117 | 2.3200001 | 0.87085E+02 | 0.72900E+03 |
| 118 | 2.3400001 | 0.73845E+02 | 0.66200E+03 |
| 119 | 2.3600001 | 0.61965E+02 | 0.59400E+03 |
| 120 | 2.3800001 | 0.51425E+02 | 0.52700E+03 |
| 121 | 2.4000001 | 0.42225E+02 | 0.46000E+03 |
| 122 | 2.4200001 | 0.34365E+02 | 0.39300E+03 |
| 123 | 2.4400001 | 0.27845E+02 | 0.32600E+03 |
| 124 | 2.4600001 | 0.22665E+02 | 0.25900E+03 |
| 125 | 2.4800001 | 0.18525E+02 | 0.20700E+03 |
| 126 | 2.5000001 | 0.15205E+02 | 0.16600E+03 |
| 127 | 2.5200001 | 0.12525E+02 | 0.13400E+03 |

|     |           |              |             |
|-----|-----------|--------------|-------------|
| 128 | 2.5400001 | 0.10365E+02  | 0.10800E+03 |
| 129 | 2.5600001 | 0.86055E+01  | 0.88000E+02 |
| 130 | 2.5800001 | 0.71695E+01  | 0.71800E+02 |
| 131 | 2.6000001 | 0.59935E+01  | 0.58800E+02 |
| 132 | 2.6200001 | 0.50255E+01  | 0.48400E+02 |
| 133 | 2.6400001 | 0.42275E+01  | 0.39900E+02 |
| 134 | 2.6600001 | 0.35655E+01  | 0.33100E+02 |
| 135 | 2.6800001 | 0.30155E+01  | 0.27500E+02 |
| 136 | 2.7000001 | 0.25575E+01  | 0.22900E+02 |
| 137 | 2.7200001 | 0.21755E+01  | 0.19100E+02 |
| 138 | 2.7400001 | 0.18535E+01  | 0.16100E+02 |
| 139 | 2.7600001 | 0.15835E+01  | 0.13500E+02 |
| 140 | 2.7800001 | 0.13555E+01  | 0.11400E+02 |
| 141 | 2.8000001 | 0.11629E+01  | 0.96300E+01 |
| 142 | 2.8200001 | 0.99949E+00  | 0.81700E+01 |
| 143 | 2.8400001 | 0.86069E+00  | 0.69400E+01 |
| 144 | 2.8600001 | 0.74249E+00  | 0.59100E+01 |
| 145 | 2.8800001 | 0.64149E+00  | 0.50500E+01 |
| 146 | 2.9000001 | 0.55509E+00  | 0.43200E+01 |
| 147 | 2.9200001 | 0.48089E+00  | 0.37100E+01 |
| 148 | 2.9400001 | 0.41709E+00  | 0.31900E+01 |
| 149 | 2.9600001 | 0.36209E+00  | 0.27500E+01 |
| 150 | 2.9800001 | 0.31469E+00  | 0.23700E+01 |
| 151 | 3.0000001 | 0.27369E+00  | 0.20500E+01 |
| 152 | 3.0200001 | 0.23829E+00  | 0.17700E+01 |
| 153 | 3.0400001 | 0.20749E+00  | 0.15400E+01 |
| 154 | 3.0600001 | 0.18069E+00  | 0.13400E+01 |
| 155 | 3.0800001 | 0.15749E+00  | 0.11600E+01 |
| 156 | 3.1000001 | 0.13729E+00  | 0.10100E+01 |
| 157 | 3.1200001 | 0.11961E+00  | 0.88400E+00 |
| 158 | 3.1400001 | 0.10415E+00  | 0.77300E+00 |
| 159 | 3.1600001 | 0.90625E-01  | 0.67600E+00 |
| 160 | 3.1800001 | 0.78785E-01  | 0.59200E+00 |
| 161 | 3.2000001 | 0.68405E-01  | 0.51900E+00 |
| 162 | 3.2200001 | 0.59305E-01  | 0.45500E+00 |
| 163 | 3.2400001 | 0.51305E-01  | 0.40000E+00 |
| 164 | 3.2600001 | 0.44285E-01  | 0.35100E+00 |
| 165 | 3.2800001 | 0.38085E-01  | 0.31000E+00 |
| 166 | 3.3000001 | 0.32645E-01  | 0.27200E+00 |
| 167 | 3.3200001 | 0.27865E-01  | 0.23900E+00 |
| 168 | 3.3400001 | 0.23625E-01  | 0.21200E+00 |
| 169 | 3.3600001 | 0.19905E-01  | 0.18600E+00 |
| 170 | 3.3800001 | 0.16625E-01  | 0.16400E+00 |
| 171 | 3.4000001 | 0.13725E-01  | 0.14500E+00 |
| 172 | 3.4200001 | 0.11165E-01  | 0.12800E+00 |
| 173 | 3.4400001 | 0.89055E-02  | 0.11300E+00 |
| 174 | 3.4600001 | 0.69155E-02  | 0.99500E-01 |
| 175 | 3.4800001 | 0.51515E-02  | 0.88200E-01 |
| 176 | 3.5000001 | 0.36075E-02  | 0.77200E-01 |
| 177 | 3.5200001 | 0.22395E-02  | 0.68400E-01 |
| 178 | 3.5400001 | 0.10355E-02  | 0.60200E-01 |
| 179 | 3.5600001 | -0.22549E-04 | 0.52900E-01 |
| 180 | 3.5800001 | -0.95255E-03 | 0.46500E-01 |
| 181 | 3.6000001 | -0.17745E-02 | 0.41100E-01 |
| 182 | 3.6200001 | -0.24865E-02 | 0.35600E-01 |
| 183 | 3.6400001 | -0.31125E-02 | 0.31300E-01 |
| 184 | 3.6600001 | -0.36605E-02 | 0.27400E-01 |
| 185 | 3.6800001 | -0.41465E-02 | 0.24300E-01 |
| 186 | 3.7000001 | -0.45565E-02 | 0.20500E-01 |
| 187 | 3.7200001 | -0.49085E-02 | 0.17600E-01 |
| 188 | 3.7400001 | -0.52285E-02 | 0.16000E-01 |
| 189 | 3.7600001 | -0.54905E-02 | 0.13100E-01 |
| 190 | 3.7800001 | -0.57085E-02 | 0.10900E-01 |
| 191 | 3.8000001 | -0.59075E-02 | 0.99500E-02 |
| 192 | 3.8200001 | -0.60703E-02 | 0.81400E-02 |
| 193 | 3.8400001 | -0.62099E-02 | 0.69800E-02 |

|     |            |              |              |
|-----|------------|--------------|--------------|
| 194 | 3.86000001 | -0.63189E-02 | 0.54500E-02  |
| 195 | 3.88000001 | -0.64093E-02 | 0.45200E-02  |
| 196 | 3.90000001 | -0.64733E-02 | 0.32000E-02  |
| 197 | 3.92000001 | -0.65325E-02 | 0.29600E-02  |
| 198 | 3.94000001 | -0.65683E-02 | 0.17900E-02  |
| 199 | 3.96000001 | -0.66021E-02 | 0.16900E-02  |
| 200 | 3.98000001 | -0.66339E-02 | 0.15900E-02  |
| 201 | 4.00000001 | -0.66637E-02 | 0.14900E-02  |
| 202 | 4.02000001 | -0.66676E-02 | 0.19300E-03  |
| 203 | 4.04000001 | -0.66589E-02 | -0.43400E-03 |
| 204 | 4.06000001 | -0.66464E-02 | -0.62500E-03 |
| 205 | 4.08000001 | -0.66265E-02 | -0.99500E-03 |
| 206 | 4.10000001 | -0.65997E-02 | -0.13400E-02 |
| 207 | 4.12000001 | -0.65661E-02 | -0.16800E-02 |
| 208 | 4.14000001 | -0.65259E-02 | -0.20100E-02 |
| 209 | 4.16000001 | -0.64795E-02 | -0.23200E-02 |
| 210 | 4.18000001 | -0.64271E-02 | -0.26200E-02 |
| 211 | 4.20000001 | -0.63735E-02 | -0.26800E-02 |
| 212 | 4.22000001 | -0.63189E-02 | -0.27300E-02 |
| 213 | 4.24000001 | -0.62631E-02 | -0.27900E-02 |
| 214 | 4.26000001 | -0.62061E-02 | -0.28500E-02 |
| 215 | 4.28000001 | -0.61483E-02 | -0.28900E-02 |
| 216 | 4.30000001 | -0.60903E-02 | -0.29000E-02 |
| 217 | 4.32000001 | -0.60319E-02 | -0.29200E-02 |
| 218 | 4.34000001 | -0.59733E-02 | -0.29300E-02 |
| 219 | 4.36000001 | -0.59145E-02 | -0.29400E-02 |
| 220 | 4.38000001 | -0.58553E-02 | -0.29600E-02 |
| 221 | 4.40000001 | -0.57959E-02 | -0.29700E-02 |
| 222 | 4.42000001 | -0.57361E-02 | -0.29900E-02 |
| 223 | 4.44000001 | -0.56761E-02 | -0.30000E-02 |
| 224 | 4.46000001 | -0.56157E-02 | -0.30200E-02 |
| 225 | 4.48000001 | -0.55551E-02 | -0.30300E-02 |
| 226 | 4.50000001 | -0.54943E-02 | -0.30400E-02 |
| 227 | 4.52000001 | -0.54329E-02 | -0.30700E-02 |
| 228 | 4.54000001 | -0.53729E-02 | -0.30000E-02 |
| 229 | 4.56000001 | -0.53145E-02 | -0.29200E-02 |
| 230 | 4.58000001 | -0.52575E-02 | -0.28500E-02 |
| 231 | 4.60000001 | -0.52019E-02 | -0.27800E-02 |
| 232 | 4.62000001 | -0.51477E-02 | -0.27100E-02 |
| 233 | 4.64000001 | -0.50949E-02 | -0.26400E-02 |
| 234 | 4.66000001 | -0.50435E-02 | -0.25700E-02 |
| 235 | 4.68000001 | -0.49937E-02 | -0.24900E-02 |
| 236 | 4.70000001 | -0.49453E-02 | -0.24200E-02 |
| 237 | 4.72000001 | -0.48983E-02 | -0.23500E-02 |
| 238 | 4.74000001 | -0.48527E-02 | -0.22800E-02 |
| 239 | 4.76000001 | -0.48119E-02 | -0.20400E-02 |
| 240 | 4.78000001 | -0.47739E-02 | -0.19000E-02 |
| 241 | 4.80000001 | -0.47369E-02 | -0.18500E-02 |
| 242 | 4.82000001 | -0.47005E-02 | -0.18200E-02 |
| 243 | 4.84000001 | -0.46645E-02 | -0.18000E-02 |
| 244 | 4.86000001 | -0.46289E-02 | -0.17800E-02 |
| 245 | 4.88000001 | -0.45947E-02 | -0.17100E-02 |
| 246 | 4.90000001 | -0.45609E-02 | -0.16900E-02 |
| 247 | 4.92000001 | -0.45275E-02 | -0.16700E-02 |
| 248 | 4.94000001 | -0.44953E-02 | -0.16100E-02 |
| 249 | 4.96000001 | -0.44637E-02 | -0.15800E-02 |
| 250 | 4.98000001 | -0.44325E-02 | -0.15600E-02 |
| 251 | 5.00000001 | -0.44017E-02 | -0.15400E-02 |
| 252 | 5.02000001 | -0.43715E-02 | -0.15100E-02 |
| 253 | 5.04000001 | -0.43417E-02 | -0.14900E-02 |
| 254 | 5.06000001 | -0.43123E-02 | -0.14700E-02 |
| 255 | 5.08000001 | -0.42849E-02 | -0.13700E-02 |
| 256 | 5.10000001 | -0.42595E-02 | -0.12700E-02 |
| 257 | 5.12000001 | -0.42349E-02 | -0.12300E-02 |
| 258 | 5.14000001 | -0.42113E-02 | -0.11800E-02 |
| 259 | 5.16000001 | -0.41885E-02 | -0.11400E-02 |

|     |            |              |              |
|-----|------------|--------------|--------------|
| 260 | 5.18000001 | -0.41665E-02 | -0.11000E-02 |
| 261 | 5.20000001 | -0.41453E-02 | -0.10600E-02 |
| 262 | 5.22000001 | -0.41249E-02 | -0.10200E-02 |
| 263 | 5.24000001 | -0.41054E-02 | -0.97700E-03 |
| 264 | 5.26000001 | -0.40867E-02 | -0.93600E-03 |
| 265 | 5.28000001 | -0.40681E-02 | -0.92800E-03 |
| 266 | 5.30000001 | -0.40497E-02 | -0.91800E-03 |
| 267 | 5.32000001 | -0.40316E-02 | -0.90500E-03 |
| 268 | 5.34000001 | -0.40138E-02 | -0.89200E-03 |
| 269 | 5.36000001 | -0.39962E-02 | -0.87800E-03 |
| 270 | 5.38000001 | -0.39789E-02 | -0.86500E-03 |
| 271 | 5.40000001 | -0.39619E-02 | -0.85200E-03 |
| 272 | 5.42000001 | -0.39451E-02 | -0.83900E-03 |
| 273 | 5.44000001 | -0.39286E-02 | -0.82600E-03 |
| 274 | 5.46000001 | -0.39124E-02 | -0.81200E-03 |
| 275 | 5.48000001 | -0.38964E-02 | -0.79900E-03 |
| 276 | 5.50000001 | -0.38807E-02 | -0.78600E-03 |
| 277 | 5.52000001 | -0.38651E-02 | -0.78000E-03 |
| 278 | 5.54000001 | -0.38496E-02 | -0.77500E-03 |
| 279 | 5.56000001 | -0.38342E-02 | -0.76900E-03 |
| 280 | 5.58000001 | -0.38189E-02 | -0.76300E-03 |
| 281 | 5.60000001 | -0.38038E-02 | -0.75700E-03 |
| 282 | 5.62000001 | -0.37888E-02 | -0.75100E-03 |
| 283 | 5.64000001 | -0.37738E-02 | -0.74600E-03 |
| 284 | 5.66000001 | -0.37590E-02 | -0.74000E-03 |
| 285 | 5.68000001 | -0.37443E-02 | -0.73900E-03 |
| 286 | 5.70000001 | -0.37304E-02 | -0.69400E-03 |
| 287 | 5.72000001 | -0.37171E-02 | -0.66300E-03 |
| 288 | 5.74000001 | -0.37045E-02 | -0.63300E-03 |
| 289 | 5.76000001 | -0.36924E-02 | -0.60200E-03 |
| 290 | 5.78000001 | -0.36806E-02 | -0.59200E-03 |
| 291 | 5.80000001 | -0.36690E-02 | -0.58100E-03 |
| 292 | 5.82000001 | -0.36575E-02 | -0.57500E-03 |
| 293 | 5.84000001 | -0.36464E-02 | -0.55100E-03 |
| 294 | 5.86000001 | -0.36358E-02 | -0.53100E-03 |
| 295 | 5.88000001 | -0.36256E-02 | -0.51100E-03 |
| 296 | 5.90000001 | -0.36158E-02 | -0.49100E-03 |
| 297 | 5.92000001 | -0.36064E-02 | -0.47100E-03 |
| 298 | 5.94000001 | -0.35973E-02 | -0.45100E-03 |
| 299 | 5.96000001 | -0.35887E-02 | -0.43100E-03 |
| 300 | 5.98000001 | -0.35805E-02 | -0.41100E-03 |
| 301 | 6.00000001 | -0.35727E-02 | -0.39100E-03 |
| 302 | 6.02000001 | -0.35653E-02 | -0.37100E-03 |
| 303 | 6.04000001 | -0.35582E-02 | -0.35100E-03 |
| 304 | 6.06000001 | -0.35516E-02 | -0.33100E-03 |
| 305 | 6.08000001 | -0.35454E-02 | -0.31100E-03 |
| 306 | 6.10000001 | -0.35396E-02 | -0.29100E-03 |
| 307 | 6.12000001 | -0.35342E-02 | -0.27100E-03 |
| 308 | 6.14000001 | -0.35291E-02 | -0.25100E-03 |
| 309 | 6.16000001 | -0.35245E-02 | -0.23100E-03 |
| 310 | 6.18000001 | -0.35202E-02 | -0.21800E-03 |
| 311 | 6.20000001 | -0.35159E-02 | -0.21100E-03 |
| 312 | 6.22000001 | -0.35118E-02 | -0.20500E-03 |
| 313 | 6.24000001 | -0.35079E-02 | -0.19800E-03 |
| 314 | 6.26000001 | -0.35041E-02 | -0.19100E-03 |
| 315 | 6.28000001 | -0.35004E-02 | -0.18500E-03 |
| 316 | 6.30000001 | -0.34968E-02 | -0.17800E-03 |
| 317 | 6.32000001 | -0.34934E-02 | -0.17200E-03 |
| 318 | 6.34000001 | -0.34901E-02 | -0.16500E-03 |
| 319 | 6.36000001 | -0.34869E-02 | -0.15800E-03 |
| 320 | 6.38000001 | -0.34839E-02 | -0.15200E-03 |
| 321 | 6.40000001 | -0.34810E-02 | -0.14500E-03 |
| 322 | 6.42000001 | -0.34782E-02 | -0.13900E-03 |
| 323 | 6.44000001 | -0.34755E-02 | -0.13200E-03 |
| 324 | 6.46000001 | -0.34730E-02 | -0.12600E-03 |
| 325 | 6.48000001 | -0.34706E-02 | -0.11900E-03 |

|     |           |              |              |
|-----|-----------|--------------|--------------|
| 326 | 6.5000001 | -0.34684E-02 | -0.11200E-03 |
| 327 | 6.5200001 | -0.34663E-02 | -0.10600E-03 |
| 328 | 6.5400001 | -0.34643E-02 | -0.99300E-04 |
| 329 | 6.5600001 | -0.34624E-02 | -0.92700E-04 |
| 330 | 6.5800001 | -0.34607E-02 | -0.86100E-04 |
| 331 | 6.6000001 | -0.34591E-02 | -0.79500E-04 |
| 332 | 6.6200001 | -0.34577E-02 | -0.72900E-04 |
| 333 | 6.6400001 | -0.34564E-02 | -0.66400E-04 |
| 334 | 6.6600001 | -0.34549E-02 | -0.71100E-04 |
| 335 | 6.6800001 | -0.34534E-02 | -0.75900E-04 |
| 336 | 6.7000001 | -0.34518E-02 | -0.80600E-04 |
| 337 | 6.7200001 | -0.34501E-02 | -0.85400E-04 |
| 338 | 6.7400001 | -0.34483E-02 | -0.90100E-04 |
| 339 | 6.7600001 | -0.34464E-02 | -0.94900E-04 |
| 340 | 6.7800001 | -0.34444E-02 | -0.99600E-04 |
| 341 | 6.8000001 | -0.34423E-02 | -0.10400E-03 |
| 342 | 6.8200001 | -0.34401E-02 | -0.10900E-03 |
| 343 | 6.8400001 | -0.34379E-02 | -0.11400E-03 |
| 344 | 6.8600001 | -0.34355E-02 | -0.11900E-03 |
| 345 | 6.8800001 | -0.34330E-02 | -0.12300E-03 |
| 346 | 6.9000001 | -0.34305E-02 | -0.12800E-03 |
| 347 | 6.9200001 | -0.34278E-02 | -0.13300E-03 |
| 348 | 6.9400001 | -0.34250E-02 | -0.13800E-03 |
| 349 | 6.9600001 | -0.34222E-02 | -0.14200E-03 |
| 350 | 6.9800001 | -0.34193E-02 | -0.14700E-03 |
| 351 | 7.0000001 | -0.34162E-02 | -0.15200E-03 |
| 352 | 7.0200001 | -0.34131E-02 | -0.15700E-03 |
| 353 | 7.0400001 | -0.34099E-02 | -0.16100E-03 |
| 354 | 7.0600001 | -0.34065E-02 | -0.16600E-03 |
| 355 | 7.0800001 | -0.34031E-02 | -0.17100E-03 |
| 356 | 7.1000001 | -0.33996E-02 | -0.17600E-03 |
| 357 | 7.1200001 | -0.33960E-02 | -0.18000E-03 |
| 358 | 7.1400001 | -0.33923E-02 | -0.18500E-03 |
| 359 | 7.1600001 | -0.33885E-02 | -0.19000E-03 |
| 360 | 7.1800001 | -0.33846E-02 | -0.19500E-03 |
| 361 | 7.2000001 | -0.33806E-02 | -0.20000E-03 |
| 362 | 7.2200001 | -0.33765E-02 | -0.20400E-03 |
| 363 | 7.2400001 | -0.33723E-02 | -0.20900E-03 |
| 364 | 7.2600001 | -0.33681E-02 | -0.21400E-03 |
| 365 | 7.2800001 | -0.33637E-02 | -0.21900E-03 |
| 366 | 7.3000001 | -0.33592E-02 | -0.22300E-03 |
| 367 | 7.3200001 | -0.33547E-02 | -0.22800E-03 |
| 368 | 7.3400001 | -0.33500E-02 | -0.23300E-03 |
| 369 | 7.3600001 | -0.33452E-02 | -0.23800E-03 |
| 370 | 7.3800001 | -0.33404E-02 | -0.24200E-03 |
| 371 | 7.4000001 | -0.33355E-02 | -0.24700E-03 |
| 372 | 7.4200001 | -0.33304E-02 | -0.25200E-03 |
| 373 | 7.4400001 | -0.33253E-02 | -0.25700E-03 |
| 374 | 7.4600001 | -0.33201E-02 | -0.26100E-03 |
| 375 | 7.4800001 | -0.33147E-02 | -0.26600E-03 |
| 376 | 7.5000001 | -0.33093E-02 | -0.27100E-03 |
| 377 | 7.5200001 | -0.33038E-02 | -0.27600E-03 |
| 378 | 7.5400001 | -0.32982E-02 | -0.28000E-03 |
| 379 | 7.5600001 | -0.32925E-02 | -0.28500E-03 |
| 380 | 7.5800001 | -0.32867E-02 | -0.29000E-03 |
| 381 | 7.6000001 | -0.32808E-02 | -0.29500E-03 |
| 382 | 7.6200001 | -0.32748E-02 | -0.29900E-03 |
| 383 | 7.6400001 | -0.32687E-02 | -0.30400E-03 |
| 384 | 7.6600001 | -0.32626E-02 | -0.30900E-03 |
| 385 | 7.6800001 | -0.32563E-02 | -0.31400E-03 |
| 386 | 7.7000001 | -0.32499E-02 | -0.31800E-03 |
| 387 | 7.7200001 | -0.32435E-02 | -0.32300E-03 |
| 388 | 7.7400001 | -0.32369E-02 | -0.32800E-03 |
| 389 | 7.7600001 | -0.32302E-02 | -0.33300E-03 |
| 390 | 7.7800001 | -0.32235E-02 | -0.33700E-03 |
| 391 | 7.8000001 | -0.32167E-02 | -0.34200E-03 |

|     |           |              |              |
|-----|-----------|--------------|--------------|
| 392 | 7.8200001 | -0.32097E-02 | -0.34700E-03 |
| 393 | 7.8400001 | -0.32027E-02 | -0.35200E-03 |
| 394 | 7.8600001 | -0.31956E-02 | -0.35600E-03 |
| 395 | 7.8800001 | -0.31883E-02 | -0.36100E-03 |
| 396 | 7.9000001 | -0.31810E-02 | -0.36600E-03 |
| 397 | 7.9200001 | -0.31736E-02 | -0.37100E-03 |
| 398 | 7.9400001 | -0.31661E-02 | -0.37500E-03 |
| 399 | 7.9600001 | -0.31585E-02 | -0.38000E-03 |
| 400 | 7.9800001 | -0.31508E-02 | -0.38500E-03 |
| 401 | 8.0000001 | -0.31430E-02 | -0.39000E-03 |
| 402 | 8.0200001 | -0.31351E-02 | -0.39400E-03 |
| 403 | 8.0400001 | -0.31271E-02 | -0.39900E-03 |
| 404 | 8.0600001 | -0.31191E-02 | -0.40400E-03 |
| 405 | 8.0800001 | -0.31109E-02 | -0.40900E-03 |
| 406 | 8.1000001 | -0.31026E-02 | -0.41400E-03 |
| 407 | 8.1200001 | -0.30942E-02 | -0.41800E-03 |
| 408 | 8.1400001 | -0.30858E-02 | -0.42300E-03 |
| 409 | 8.1600001 | -0.30772E-02 | -0.42800E-03 |
| 410 | 8.1800001 | -0.30686E-02 | -0.43300E-03 |
| 411 | 8.2000001 | -0.30598E-02 | -0.43700E-03 |
| 412 | 8.2200001 | -0.30510E-02 | -0.44200E-03 |
| 413 | 8.2400001 | -0.30420E-02 | -0.44700E-03 |
| 414 | 8.2600001 | -0.30330E-02 | -0.45200E-03 |
| 415 | 8.2800001 | -0.30239E-02 | -0.45600E-03 |
| 416 | 8.3000001 | -0.30147E-02 | -0.46100E-03 |
| 417 | 8.3200001 | -0.30053E-02 | -0.46600E-03 |
| 418 | 8.3400001 | -0.29959E-02 | -0.47100E-03 |
| 419 | 8.3600001 | -0.29864E-02 | -0.47500E-03 |
| 420 | 8.3800001 | -0.29768E-02 | -0.48000E-03 |
| 421 | 8.4000001 | -0.29671E-02 | -0.48500E-03 |
| 422 | 8.4200001 | -0.29573E-02 | -0.49000E-03 |
| 423 | 8.4400001 | -0.29474E-02 | -0.49400E-03 |
| 424 | 8.4600001 | -0.29375E-02 | -0.49900E-03 |
| 425 | 8.4800001 | -0.29274E-02 | -0.50400E-03 |
| 426 | 8.5000001 | -0.29172E-02 | -0.50900E-03 |
| 427 | 8.5200001 | -0.29069E-02 | -0.51300E-03 |
| 428 | 8.5400001 | -0.28966E-02 | -0.51800E-03 |
| 429 | 8.5600001 | -0.28861E-02 | -0.52300E-03 |
| 430 | 8.5800001 | -0.28756E-02 | -0.52800E-03 |
| 431 | 8.6000001 | -0.28649E-02 | -0.53200E-03 |
| 432 | 8.6200001 | -0.28542E-02 | -0.53700E-03 |
| 433 | 8.6400001 | -0.28433E-02 | -0.54200E-03 |
| 434 | 8.6600001 | -0.28324E-02 | -0.54700E-03 |
| 435 | 8.6800001 | -0.28214E-02 | -0.55100E-03 |
| 436 | 8.7000001 | -0.28103E-02 | -0.55600E-03 |
| 437 | 8.7200001 | -0.27990E-02 | -0.56100E-03 |
| 438 | 8.7400001 | -0.27877E-02 | -0.56600E-03 |
| 439 | 8.7600001 | -0.27763E-02 | -0.57000E-03 |
| 440 | 8.7800001 | -0.27648E-02 | -0.57500E-03 |
| 441 | 8.8000001 | -0.27532E-02 | -0.58000E-03 |
| 442 | 8.8200001 | -0.27415E-02 | -0.58500E-03 |
| 443 | 8.8400001 | -0.27297E-02 | -0.58900E-03 |
| 444 | 8.8600001 | -0.27179E-02 | -0.59400E-03 |
| 445 | 8.8800001 | -0.27059E-02 | -0.59900E-03 |
| 446 | 8.9000001 | -0.26938E-02 | -0.60400E-03 |
| 447 | 8.9200001 | -0.26816E-02 | -0.60800E-03 |
| 448 | 8.9400001 | -0.26694E-02 | -0.61300E-03 |
| 449 | 8.9600001 | -0.26570E-02 | -0.61800E-03 |
| 450 | 8.9800001 | -0.26446E-02 | -0.62300E-03 |
| 451 | 9.0000001 | -0.26320E-02 | -0.62800E-03 |
| 452 | 9.0200001 | -0.26194E-02 | -0.63200E-03 |
| 453 | 9.0400001 | -0.26066E-02 | -0.63700E-03 |
| 454 | 9.0600001 | -0.25938E-02 | -0.64200E-03 |
| 455 | 9.0800001 | -0.25808E-02 | -0.64700E-03 |
| 456 | 9.1000001 | -0.25678E-02 | -0.65100E-03 |
| 457 | 9.1200001 | -0.25547E-02 | -0.65600E-03 |

| 12/13/16 | lammps.E1_E1.table |              |              | 8 |
|----------|--------------------|--------------|--------------|---|
| 458      | 9.14000001         | -0.25415E-02 | -0.66100E-03 |   |
| 459      | 9.16000001         | -0.25282E-02 | -0.66600E-03 |   |
| 460      | 9.18000001         | -0.25148E-02 | -0.67000E-03 |   |
| 461      | 9.20000001         | -0.25013E-02 | -0.67500E-03 |   |
| 462      | 9.22000001         | -0.24877E-02 | -0.68000E-03 |   |
| 463      | 9.24000001         | -0.24740E-02 | -0.68500E-03 |   |
| 464      | 9.26000001         | -0.24602E-02 | -0.68900E-03 |   |
| 465      | 9.28000001         | -0.24463E-02 | -0.69400E-03 |   |
| 466      | 9.30000001         | -0.24323E-02 | -0.69900E-03 |   |
| 467      | 9.32000001         | -0.24182E-02 | -0.70400E-03 |   |
| 468      | 9.34000001         | -0.24041E-02 | -0.70800E-03 |   |
| 469      | 9.36000001         | -0.23898E-02 | -0.71300E-03 |   |
| 470      | 9.38000001         | -0.23755E-02 | -0.71800E-03 |   |
| 471      | 9.40000001         | -0.23610E-02 | -0.72300E-03 |   |
| 472      | 9.42000001         | -0.23465E-02 | -0.72700E-03 |   |
| 473      | 9.44000001         | -0.23318E-02 | -0.73200E-03 |   |
| 474      | 9.46000001         | -0.23171E-02 | -0.73700E-03 |   |
| 475      | 9.48000001         | -0.23022E-02 | -0.74200E-03 |   |
| 476      | 9.50000001         | -0.22873E-02 | -0.74600E-03 |   |
| 477      | 9.52000001         | -0.22723E-02 | -0.75100E-03 |   |
| 478      | 9.54000001         | -0.22572E-02 | -0.75600E-03 |   |
| 479      | 9.56000001         | -0.22420E-02 | -0.76100E-03 |   |
| 480      | 9.58000001         | -0.22267E-02 | -0.76500E-03 |   |
| 481      | 9.60000001         | -0.22113E-02 | -0.77000E-03 |   |
| 482      | 9.62000001         | -0.21958E-02 | -0.77500E-03 |   |
| 483      | 9.64000001         | -0.21802E-02 | -0.78000E-03 |   |
| 484      | 9.66000001         | -0.21645E-02 | -0.78400E-03 |   |
| 485      | 9.68000001         | -0.21487E-02 | -0.78900E-03 |   |
| 486      | 9.70000001         | -0.21328E-02 | -0.79400E-03 |   |
| 487      | 9.72000001         | -0.21168E-02 | -0.79900E-03 |   |
| 488      | 9.74000001         | -0.21008E-02 | -0.80300E-03 |   |
| 489      | 9.76000001         | -0.20846E-02 | -0.80800E-03 |   |
| 490      | 9.78000001         | -0.20684E-02 | -0.81300E-03 |   |
| 491      | 9.80000001         | -0.20520E-02 | -0.81800E-03 |   |
| 492      | 9.82000001         | -0.20356E-02 | -0.82200E-03 |   |
| 493      | 9.84000001         | -0.20190E-02 | -0.82700E-03 |   |
| 494      | 9.86000001         | -0.20024E-02 | -0.83200E-03 |   |
| 495      | 9.88000001         | -0.19856E-02 | -0.83700E-03 |   |
| 496      | 9.90000001         | -0.19688E-02 | -0.84200E-03 |   |
| 497      | 9.92000001         | -0.19519E-02 | -0.84600E-03 |   |
| 498      | 9.94000001         | -0.19349E-02 | -0.85100E-03 |   |
| 499      | 9.96000001         | -0.19177E-02 | -0.85600E-03 |   |
| 500      | 9.98000001         | -0.19005E-02 | -0.86100E-03 |   |
| 501      | 10.00000001        | -0.18832E-02 | -0.86500E-03 |   |
| 502      | 10.02000001        | -0.18658E-02 | -0.87000E-03 |   |
| 503      | 10.04000001        | -0.18483E-02 | -0.87500E-03 |   |
| 504      | 10.06000001        | -0.18307E-02 | -0.88000E-03 |   |
| 505      | 10.08000001        | -0.18130E-02 | -0.88400E-03 |   |
| 506      | 10.10000001        | -0.17953E-02 | -0.88900E-03 |   |
| 507      | 10.12000001        | -0.17774E-02 | -0.89400E-03 |   |
| 508      | 10.14000001        | -0.17594E-02 | -0.89900E-03 |   |
| 509      | 10.16000001        | -0.17413E-02 | -0.90300E-03 |   |
| 510      | 10.18000001        | -0.17232E-02 | -0.90800E-03 |   |
| 511      | 10.20000001        | -0.17049E-02 | -0.91300E-03 |   |
| 512      | 10.22000001        | -0.16866E-02 | -0.91800E-03 |   |
| 513      | 10.24000001        | -0.16681E-02 | -0.92200E-03 |   |
| 514      | 10.26000001        | -0.16496E-02 | -0.92700E-03 |   |
| 515      | 10.28000001        | -0.16309E-02 | -0.93200E-03 |   |
| 516      | 10.30000001        | -0.16122E-02 | -0.93700E-03 |   |
| 517      | 10.32000001        | -0.15934E-02 | -0.94100E-03 |   |
| 518      | 10.34000001        | -0.15745E-02 | -0.94600E-03 |   |
| 519      | 10.36000001        | -0.15554E-02 | -0.95100E-03 |   |
| 520      | 10.38000001        | -0.15363E-02 | -0.95600E-03 |   |
| 521      | 10.40000001        | -0.15171E-02 | -0.96000E-03 |   |
| 522      | 10.42000001        | -0.14978E-02 | -0.96500E-03 |   |
| 523      | 10.44000001        | -0.14784E-02 | -0.97000E-03 |   |



|     |            |              |              |
|-----|------------|--------------|--------------|
| 524 | 10.4600001 | -0.14589E-02 | -0.97500E-03 |
| 525 | 10.4800001 | -0.14393E-02 | -0.97900E-03 |
| 526 | 10.5000001 | -0.14197E-02 | -0.98400E-03 |
| 527 | 10.5200001 | -0.13999E-02 | -0.98900E-03 |
| 528 | 10.5400001 | -0.13800E-02 | -0.99400E-03 |
| 529 | 10.5600001 | -0.13600E-02 | -0.99800E-03 |
| 530 | 10.5800001 | -0.13400E-02 | -0.10000E-02 |
| 531 | 10.6000001 | -0.13198E-02 | -0.10100E-02 |
| 532 | 10.6200001 | -0.12996E-02 | -0.10100E-02 |
| 533 | 10.6400001 | -0.12792E-02 | -0.10200E-02 |
| 534 | 10.6600001 | -0.12588E-02 | -0.10200E-02 |
| 535 | 10.6800001 | -0.12382E-02 | -0.10300E-02 |
| 536 | 10.7000001 | -0.12176E-02 | -0.10300E-02 |
| 537 | 10.7200001 | -0.11968E-02 | -0.10400E-02 |
| 538 | 10.7400001 | -0.11760E-02 | -0.10400E-02 |
| 539 | 10.7600001 | -0.11550E-02 | -0.10500E-02 |
| 540 | 10.7800001 | -0.11340E-02 | -0.10500E-02 |
| 541 | 10.8000001 | -0.11128E-02 | -0.10600E-02 |
| 542 | 10.8200001 | -0.10916E-02 | -0.10600E-02 |
| 543 | 10.8400001 | -0.10702E-02 | -0.10700E-02 |
| 544 | 10.8600001 | -0.10488E-02 | -0.10700E-02 |
| 545 | 10.8800001 | -0.10274E-02 | -0.10700E-02 |
| 546 | 10.9000001 | -0.10058E-02 | -0.10800E-02 |
| 547 | 10.9200001 | -0.98424E-03 | -0.10800E-02 |
| 548 | 10.9400001 | -0.96244E-03 | -0.10900E-02 |
| 549 | 10.9600001 | -0.94064E-03 | -0.10900E-02 |
| 550 | 10.9800001 | -0.91864E-03 | -0.11000E-02 |
| 551 | 11.0000001 | -0.89664E-03 | -0.11000E-02 |
| 552 | 11.0200001 | -0.87444E-03 | -0.11100E-02 |
| 553 | 11.0400001 | -0.85224E-03 | -0.11100E-02 |
| 554 | 11.0600001 | -0.82984E-03 | -0.11200E-02 |
| 555 | 11.0800001 | -0.80744E-03 | -0.11200E-02 |
| 556 | 11.1000001 | -0.78484E-03 | -0.11300E-02 |
| 557 | 11.1200001 | -0.76224E-03 | -0.11300E-02 |
| 558 | 11.1400001 | -0.73944E-03 | -0.11400E-02 |
| 559 | 11.1600001 | -0.71664E-03 | -0.11400E-02 |
| 560 | 11.1800001 | -0.69364E-03 | -0.11500E-02 |
| 561 | 11.2000001 | -0.67064E-03 | -0.11500E-02 |
| 562 | 11.2200001 | -0.64744E-03 | -0.11600E-02 |
| 563 | 11.2400001 | -0.62424E-03 | -0.11600E-02 |
| 564 | 11.2600001 | -0.60104E-03 | -0.11600E-02 |
| 565 | 11.2800001 | -0.57764E-03 | -0.11700E-02 |
| 566 | 11.3000001 | -0.55424E-03 | -0.11700E-02 |
| 567 | 11.3200001 | -0.53064E-03 | -0.11800E-02 |
| 568 | 11.3400001 | -0.50704E-03 | -0.11800E-02 |
| 569 | 11.3600001 | -0.48324E-03 | -0.11900E-02 |
| 570 | 11.3800001 | -0.45944E-03 | -0.11900E-02 |
| 571 | 11.4000001 | -0.43544E-03 | -0.12000E-02 |
| 572 | 11.4200001 | -0.41144E-03 | -0.12000E-02 |
| 573 | 11.4400001 | -0.38724E-03 | -0.12100E-02 |
| 574 | 11.4600001 | -0.36304E-03 | -0.12100E-02 |
| 575 | 11.4800001 | -0.33864E-03 | -0.12200E-02 |
| 576 | 11.5000001 | -0.31424E-03 | -0.12200E-02 |
| 577 | 11.5200001 | -0.28964E-03 | -0.12300E-02 |
| 578 | 11.5400001 | -0.26504E-03 | -0.12300E-02 |
| 579 | 11.5600001 | -0.24024E-03 | -0.12400E-02 |
| 580 | 11.5800001 | -0.21544E-03 | -0.12400E-02 |
| 581 | 11.6000001 | -0.19044E-03 | -0.12500E-02 |
| 582 | 11.6200001 | -0.16544E-03 | -0.12500E-02 |
| 583 | 11.6400001 | -0.14024E-03 | -0.12600E-02 |
| 584 | 11.6600001 | -0.11504E-03 | -0.12600E-02 |
| 585 | 11.6800001 | -0.89839E-04 | -0.12600E-02 |
| 586 | 11.7000001 | -0.64439E-04 | -0.12700E-02 |
| 587 | 11.7200001 | -0.39039E-04 | -0.12700E-02 |
| 588 | 11.7400001 | -0.13439E-04 | -0.12800E-02 |
| 589 | 11.7600001 | -0.13439E-04 | 0.00000E+00  |

|     |            |              |              |
|-----|------------|--------------|--------------|
| 590 | 11.7800001 | 0.000000E+00 | 0.000000E+00 |
| 591 | 11.8000001 | 0.000000E+00 | 0.000000E+00 |
| 592 | 11.8200001 | 0.000000E+00 | 0.000000E+00 |
| 593 | 11.8400001 | 0.000000E+00 | 0.000000E+00 |
| 594 | 11.8600001 | 0.000000E+00 | 0.000000E+00 |
| 595 | 11.8800001 | 0.000000E+00 | 0.000000E+00 |
| 596 | 11.9000001 | 0.000000E+00 | 0.000000E+00 |
| 597 | 11.9200001 | 0.000000E+00 | 0.000000E+00 |
| 598 | 11.9400001 | 0.000000E+00 | 0.000000E+00 |
| 599 | 11.9600001 | 0.000000E+00 | 0.000000E+00 |
| 600 | 11.9800001 | 0.000000E+00 | 0.000000E+00 |
