# Supplementary material
Source: MDPI journal article supplement (https://www.mdpi.com/2226-4310/5/1/1)
Supplement: s1 [file s1]

# Tabulated potential for N1-NN

N1-NN

N 600 R 0.0000001 11.9800001

|    |           |             |             |
|----|-----------|-------------|-------------|
| 1  | 0.0000001 | 0.26983E+05 | 0.19000E+05 |
| 2  | 0.0200001 | 0.26607E+05 | 0.18800E+05 |
| 3  | 0.0400001 | 0.26233E+05 | 0.18700E+05 |
| 4  | 0.0600001 | 0.25861E+05 | 0.18600E+05 |
| 5  | 0.0800001 | 0.25493E+05 | 0.18400E+05 |
| 6  | 0.1000001 | 0.25127E+05 | 0.18300E+05 |
| 7  | 0.1200001 | 0.24763E+05 | 0.18200E+05 |
| 8  | 0.1400001 | 0.24403E+05 | 0.18000E+05 |
| 9  | 0.1600001 | 0.24045E+05 | 0.17900E+05 |
| 10 | 0.1800001 | 0.23689E+05 | 0.17800E+05 |
| 11 | 0.2000001 | 0.23335E+05 | 0.17700E+05 |
| 12 | 0.2200001 | 0.22985E+05 | 0.17500E+05 |
| 13 | 0.2400001 | 0.22637E+05 | 0.17400E+05 |
| 14 | 0.2600001 | 0.22291E+05 | 0.17300E+05 |
| 15 | 0.2800001 | 0.21949E+05 | 0.17100E+05 |
| 16 | 0.3000001 | 0.21609E+05 | 0.17000E+05 |
| 17 | 0.3200001 | 0.21271E+05 | 0.16900E+05 |
| 18 | 0.3400001 | 0.20937E+05 | 0.16700E+05 |
| 19 | 0.3600001 | 0.20605E+05 | 0.16600E+05 |
| 20 | 0.3800001 | 0.20275E+05 | 0.16500E+05 |
| 21 | 0.4000001 | 0.19949E+05 | 0.16300E+05 |
| 22 | 0.4200001 | 0.19625E+05 | 0.16200E+05 |
| 23 | 0.4400001 | 0.19303E+05 | 0.16100E+05 |
| 24 | 0.4600001 | 0.18985E+05 | 0.15900E+05 |
| 25 | 0.4800001 | 0.18669E+05 | 0.15800E+05 |
| 26 | 0.5000001 | 0.18355E+05 | 0.15700E+05 |
| 27 | 0.5200001 | 0.18045E+05 | 0.15500E+05 |
| 28 | 0.5400001 | 0.17737E+05 | 0.15400E+05 |
| 29 | 0.5600001 | 0.17431E+05 | 0.15300E+05 |
| 30 | 0.5800001 | 0.17129E+05 | 0.15100E+05 |
| 31 | 0.6000001 | 0.16829E+05 | 0.15000E+05 |
| 32 | 0.6200001 | 0.16531E+05 | 0.14900E+05 |
| 33 | 0.6400001 | 0.16237E+05 | 0.14700E+05 |
| 34 | 0.6600001 | 0.15945E+05 | 0.14600E+05 |
| 35 | 0.6800001 | 0.15655E+05 | 0.14500E+05 |
| 36 | 0.7000001 | 0.15369E+05 | 0.14300E+05 |
| 37 | 0.7200001 | 0.15085E+05 | 0.14200E+05 |
| 38 | 0.7400001 | 0.14803E+05 | 0.14100E+05 |
| 39 | 0.7600001 | 0.14525E+05 | 0.13900E+05 |
| 40 | 0.7800001 | 0.14249E+05 | 0.13800E+05 |
| 41 | 0.8000001 | 0.13975E+05 | 0.13700E+05 |
| 42 | 0.8200001 | 0.13705E+05 | 0.13500E+05 |
| 43 | 0.8400001 | 0.13437E+05 | 0.13400E+05 |
| 44 | 0.8600001 | 0.13171E+05 | 0.13300E+05 |
| 45 | 0.8800001 | 0.12909E+05 | 0.13100E+05 |
| 46 | 0.9000001 | 0.12649E+05 | 0.13000E+05 |
| 47 | 0.9200001 | 0.12391E+05 | 0.12900E+05 |
| 48 | 0.9400001 | 0.12137E+05 | 0.12700E+05 |
| 49 | 0.9600001 | 0.11885E+05 | 0.12600E+05 |
| 50 | 0.9800001 | 0.11635E+05 | 0.12500E+05 |
| 51 | 1.0000001 | 0.11389E+05 | 0.12300E+05 |
| 52 | 1.0200001 | 0.11145E+05 | 0.12200E+05 |
| 53 | 1.0400001 | 0.10903E+05 | 0.12100E+05 |
| 54 | 1.0600001 | 0.10665E+05 | 0.11900E+05 |
| 55 | 1.0800001 | 0.10429E+05 | 0.11800E+05 |
| 56 | 1.1000001 | 0.10195E+05 | 0.11700E+05 |
| 57 | 1.1200001 | 0.99654E+04 | 0.11500E+05 |
| 58 | 1.1400001 | 0.97374E+04 | 0.11400E+05 |
| 59 | 1.1600001 | 0.95114E+04 | 0.11300E+05 |
| 60 | 1.1800001 | 0.92894E+04 | 0.11100E+05 |
| 61 | 1.2000001 | 0.90694E+04 | 0.11000E+05 |

|     |           |             |             |
|-----|-----------|-------------|-------------|
| 62  | 1.2200001 | 0.88514E+04 | 0.10900E+05 |
| 63  | 1.2400001 | 0.86354E+04 | 0.10800E+05 |
| 64  | 1.2600001 | 0.84234E+04 | 0.10600E+05 |
| 65  | 1.2800001 | 0.82134E+04 | 0.10500E+05 |
| 66  | 1.3000001 | 0.80054E+04 | 0.10400E+05 |
| 67  | 1.3200001 | 0.78014E+04 | 0.10200E+05 |
| 68  | 1.3400001 | 0.75994E+04 | 0.10100E+05 |
| 69  | 1.3600001 | 0.74004E+04 | 0.99500E+04 |
| 70  | 1.3800001 | 0.72040E+04 | 0.98200E+04 |
| 71  | 1.4000001 | 0.70102E+04 | 0.96900E+04 |
| 72  | 1.4200001 | 0.68190E+04 | 0.95600E+04 |
| 73  | 1.4400001 | 0.66306E+04 | 0.94200E+04 |
| 74  | 1.4600001 | 0.64448E+04 | 0.92900E+04 |
| 75  | 1.4800001 | 0.62616E+04 | 0.91600E+04 |
| 76  | 1.5000001 | 0.60810E+04 | 0.90300E+04 |
| 77  | 1.5200001 | 0.59032E+04 | 0.88900E+04 |
| 78  | 1.5400001 | 0.57280E+04 | 0.87600E+04 |
| 79  | 1.5600001 | 0.55554E+04 | 0.86300E+04 |
| 80  | 1.5800001 | 0.53856E+04 | 0.84900E+04 |
| 81  | 1.6000001 | 0.52184E+04 | 0.83600E+04 |
| 82  | 1.6200001 | 0.50538E+04 | 0.82300E+04 |
| 83  | 1.6400001 | 0.48918E+04 | 0.81000E+04 |
| 84  | 1.6600001 | 0.47326E+04 | 0.79600E+04 |
| 85  | 1.6800001 | 0.45760E+04 | 0.78300E+04 |
| 86  | 1.7000001 | 0.44220E+04 | 0.77000E+04 |
| 87  | 1.7200001 | 0.42706E+04 | 0.75700E+04 |
| 88  | 1.7400001 | 0.41220E+04 | 0.74300E+04 |
| 89  | 1.7600001 | 0.39760E+04 | 0.73000E+04 |
| 90  | 1.7800001 | 0.38326E+04 | 0.71700E+04 |
| 91  | 1.8000001 | 0.36918E+04 | 0.70400E+04 |
| 92  | 1.8200001 | 0.35538E+04 | 0.69000E+04 |
| 93  | 1.8400001 | 0.34184E+04 | 0.67700E+04 |
| 94  | 1.8600001 | 0.32856E+04 | 0.66400E+04 |
| 95  | 1.8800001 | 0.31556E+04 | 0.65000E+04 |
| 96  | 1.9000001 | 0.30282E+04 | 0.63700E+04 |
| 97  | 1.9200001 | 0.29034E+04 | 0.62400E+04 |
| 98  | 1.9400001 | 0.27812E+04 | 0.61100E+04 |
| 99  | 1.9600001 | 0.26618E+04 | 0.59700E+04 |
| 100 | 1.9800001 | 0.25450E+04 | 0.58400E+04 |
| 101 | 2.0000001 | 0.24308E+04 | 0.57100E+04 |
| 102 | 2.0200001 | 0.23192E+04 | 0.55800E+04 |
| 103 | 2.0400001 | 0.22104E+04 | 0.54400E+04 |
| 104 | 2.0600001 | 0.21042E+04 | 0.53100E+04 |
| 105 | 2.0800001 | 0.20006E+04 | 0.51800E+04 |
| 106 | 2.1000001 | 0.18998E+04 | 0.50400E+04 |
| 107 | 2.1200001 | 0.18016E+04 | 0.49100E+04 |
| 108 | 2.1400001 | 0.17060E+04 | 0.47800E+04 |
| 109 | 2.1600001 | 0.16130E+04 | 0.46500E+04 |
| 110 | 2.1800001 | 0.15228E+04 | 0.45100E+04 |
| 111 | 2.2000001 | 0.14352E+04 | 0.43800E+04 |
| 112 | 2.2200001 | 0.13502E+04 | 0.42500E+04 |
| 113 | 2.2400001 | 0.12678E+04 | 0.41200E+04 |
| 114 | 2.2600001 | 0.11882E+04 | 0.39800E+04 |
| 115 | 2.2800001 | 0.11112E+04 | 0.38500E+04 |
| 116 | 2.3000001 | 0.10368E+04 | 0.37200E+04 |
| 117 | 2.3200001 | 0.96496E+03 | 0.35900E+04 |
| 118 | 2.3400001 | 0.89596E+03 | 0.34500E+04 |
| 119 | 2.3600001 | 0.82956E+03 | 0.33200E+04 |
| 120 | 2.3800001 | 0.76576E+03 | 0.31900E+04 |
| 121 | 2.4000001 | 0.70476E+03 | 0.30500E+04 |
| 122 | 2.4200001 | 0.64636E+03 | 0.29200E+04 |
| 123 | 2.4400001 | 0.59056E+03 | 0.27900E+04 |
| 124 | 2.4600001 | 0.53736E+03 | 0.26600E+04 |
| 125 | 2.4800001 | 0.48696E+03 | 0.25200E+04 |
| 126 | 2.5000001 | 0.43916E+03 | 0.23900E+04 |
| 127 | 2.5200001 | 0.39396E+03 | 0.22600E+04 |

|     |           |              |             |
|-----|-----------|--------------|-------------|
| 128 | 2.5400001 | 0.35136E+03  | 0.21300E+04 |
| 129 | 2.5600001 | 0.31156E+03  | 0.19900E+04 |
| 130 | 2.5800001 | 0.27436E+03  | 0.18600E+04 |
| 131 | 2.6000001 | 0.23976E+03  | 0.17300E+04 |
| 132 | 2.6200001 | 0.20796E+03  | 0.15900E+04 |
| 133 | 2.6400001 | 0.17876E+03  | 0.14600E+04 |
| 134 | 2.6600001 | 0.15216E+03  | 0.13300E+04 |
| 135 | 2.6800001 | 0.12816E+03  | 0.12000E+04 |
| 136 | 2.7000001 | 0.10696E+03  | 0.10600E+04 |
| 137 | 2.7200001 | 0.88338E+02  | 0.93100E+03 |
| 138 | 2.7400001 | 0.72378E+02  | 0.79800E+03 |
| 139 | 2.7600001 | 0.59058E+02  | 0.66600E+03 |
| 140 | 2.7800001 | 0.48398E+02  | 0.53300E+03 |
| 141 | 2.8000001 | 0.39818E+02  | 0.42900E+03 |
| 142 | 2.8200001 | 0.32898E+02  | 0.34600E+03 |
| 143 | 2.8400001 | 0.27278E+02  | 0.28100E+03 |
| 144 | 2.8600001 | 0.22698E+02  | 0.22900E+03 |
| 145 | 2.8800001 | 0.18938E+02  | 0.18800E+03 |
| 146 | 2.9000001 | 0.15858E+02  | 0.15400E+03 |
| 147 | 2.9200001 | 0.13318E+02  | 0.12700E+03 |
| 148 | 2.9400001 | 0.11218E+02  | 0.10500E+03 |
| 149 | 2.9600001 | 0.94722E+01  | 0.87300E+02 |
| 150 | 2.9800001 | 0.80182E+01  | 0.72700E+02 |
| 151 | 3.0000001 | 0.68022E+01  | 0.60800E+02 |
| 152 | 3.0200001 | 0.57842E+01  | 0.50900E+02 |
| 153 | 3.0400001 | 0.49282E+01  | 0.42800E+02 |
| 154 | 3.0600001 | 0.42062E+01  | 0.36100E+02 |
| 155 | 3.0800001 | 0.35962E+01  | 0.30500E+02 |
| 156 | 3.1000001 | 0.30802E+01  | 0.25800E+02 |
| 157 | 3.1200001 | 0.26422E+01  | 0.21900E+02 |
| 158 | 3.1400001 | 0.22682E+01  | 0.18700E+02 |
| 159 | 3.1600001 | 0.19502E+01  | 0.15900E+02 |
| 160 | 3.1800001 | 0.16782E+01  | 0.13600E+02 |
| 161 | 3.2000001 | 0.14442E+01  | 0.11700E+02 |
| 162 | 3.2200001 | 0.12442E+01  | 0.10000E+02 |
| 163 | 3.2400001 | 0.10720E+01  | 0.86100E+01 |
| 164 | 3.2600001 | 0.92357E+00  | 0.74200E+01 |
| 165 | 3.2800001 | 0.79557E+00  | 0.64000E+01 |
| 166 | 3.3000001 | 0.68497E+00  | 0.55300E+01 |
| 167 | 3.3200001 | 0.58937E+00  | 0.47800E+01 |
| 168 | 3.3400001 | 0.50637E+00  | 0.41500E+01 |
| 169 | 3.3600001 | 0.43437E+00  | 0.36000E+01 |
| 170 | 3.3800001 | 0.37197E+00  | 0.31200E+01 |
| 171 | 3.4000001 | 0.31757E+00  | 0.27200E+01 |
| 172 | 3.4200001 | 0.27017E+00  | 0.23700E+01 |
| 173 | 3.4400001 | 0.22877E+00  | 0.20700E+01 |
| 174 | 3.4600001 | 0.19277E+00  | 0.18000E+01 |
| 175 | 3.4800001 | 0.16137E+00  | 0.15700E+01 |
| 176 | 3.5000001 | 0.13397E+00  | 0.13700E+01 |
| 177 | 3.5200001 | 0.10997E+00  | 0.12000E+01 |
| 178 | 3.5400001 | 0.89172E-01  | 0.10400E+01 |
| 179 | 3.5600001 | 0.70892E-01  | 0.91400E+00 |
| 180 | 3.5800001 | 0.54832E-01  | 0.80300E+00 |
| 181 | 3.6000001 | 0.41012E-01  | 0.69100E+00 |
| 182 | 3.6200001 | 0.28792E-01  | 0.61100E+00 |
| 183 | 3.6400001 | 0.18132E-01  | 0.53300E+00 |
| 184 | 3.6600001 | 0.88521E-02  | 0.46400E+00 |
| 185 | 3.6800001 | 0.77213E-03  | 0.40400E+00 |
| 186 | 3.7000001 | -0.62479E-02 | 0.35100E+00 |
| 187 | 3.7200001 | -0.12428E-01 | 0.30900E+00 |
| 188 | 3.7400001 | -0.17688E-01 | 0.26300E+00 |
| 189 | 3.7600001 | -0.22228E-01 | 0.22700E+00 |
| 190 | 3.7800001 | -0.26228E-01 | 0.20000E+00 |
| 191 | 3.8000001 | -0.29668E-01 | 0.17200E+00 |
| 192 | 3.8200001 | -0.32508E-01 | 0.14200E+00 |
| 193 | 3.8400001 | -0.35028E-01 | 0.12600E+00 |

|     |            |              |              |
|-----|------------|--------------|--------------|
| 194 | 3.86000001 | -0.37168E-01 | 0.10700E+00  |
| 195 | 3.88000001 | -0.38868E-01 | 0.85000E-01  |
| 196 | 3.90000001 | -0.40374E-01 | 0.75300E-01  |
| 197 | 3.92000001 | -0.41622E-01 | 0.62400E-01  |
| 198 | 3.94000001 | -0.42546E-01 | 0.46200E-01  |
| 199 | 3.96000001 | -0.43274E-01 | 0.36400E-01  |
| 200 | 3.98000001 | -0.43932E-01 | 0.32900E-01  |
| 201 | 4.00000001 | -0.44342E-01 | 0.20500E-01  |
| 202 | 4.02000001 | -0.44624E-01 | 0.14100E-01  |
| 203 | 4.04000001 | -0.44898E-01 | 0.13700E-01  |
| 204 | 4.06000001 | -0.44979E-01 | 0.40700E-02  |
| 205 | 4.08000001 | -0.44981E-01 | 0.68700E-04  |
| 206 | 4.10000001 | -0.44817E-01 | -0.81800E-02 |
| 207 | 4.12000001 | -0.44654E-01 | -0.81400E-02 |
| 208 | 4.14000001 | -0.44492E-01 | -0.81000E-02 |
| 209 | 4.16000001 | -0.44196E-01 | -0.14800E-01 |
| 210 | 4.18000001 | -0.43874E-01 | -0.16100E-01 |
| 211 | 4.20000001 | -0.43534E-01 | -0.17000E-01 |
| 212 | 4.22000001 | -0.43082E-01 | -0.22600E-01 |
| 213 | 4.24000001 | -0.42626E-01 | -0.22800E-01 |
| 214 | 4.26000001 | -0.42170E-01 | -0.22800E-01 |
| 215 | 4.28000001 | -0.41694E-01 | -0.23800E-01 |
| 216 | 4.30000001 | -0.41192E-01 | -0.25100E-01 |
| 217 | 4.32000001 | -0.40664E-01 | -0.26400E-01 |
| 218 | 4.34000001 | -0.40116E-01 | -0.27400E-01 |
| 219 | 4.36000001 | -0.39548E-01 | -0.28400E-01 |
| 220 | 4.38000001 | -0.38960E-01 | -0.29400E-01 |
| 221 | 4.40000001 | -0.38352E-01 | -0.30400E-01 |
| 222 | 4.42000001 | -0.37744E-01 | -0.30400E-01 |
| 223 | 4.44000001 | -0.37146E-01 | -0.29900E-01 |
| 224 | 4.46000001 | -0.36558E-01 | -0.29400E-01 |
| 225 | 4.48000001 | -0.35978E-01 | -0.29000E-01 |
| 226 | 4.50000001 | -0.35410E-01 | -0.28400E-01 |
| 227 | 4.52000001 | -0.34846E-01 | -0.28200E-01 |
| 228 | 4.54000001 | -0.34284E-01 | -0.28100E-01 |
| 229 | 4.56000001 | -0.33726E-01 | -0.27900E-01 |
| 230 | 4.58000001 | -0.33170E-01 | -0.27800E-01 |
| 231 | 4.60000001 | -0.32616E-01 | -0.27700E-01 |
| 232 | 4.62000001 | -0.32076E-01 | -0.27000E-01 |
| 233 | 4.64000001 | -0.31542E-01 | -0.26700E-01 |
| 234 | 4.66000001 | -0.31032E-01 | -0.25500E-01 |
| 235 | 4.68000001 | -0.30524E-01 | -0.25400E-01 |
| 236 | 4.70000001 | -0.30016E-01 | -0.25400E-01 |
| 237 | 4.72000001 | -0.29508E-01 | -0.25400E-01 |
| 238 | 4.74000001 | -0.29002E-01 | -0.25300E-01 |
| 239 | 4.76000001 | -0.28548E-01 | -0.22700E-01 |
| 240 | 4.78000001 | -0.28098E-01 | -0.22500E-01 |
| 241 | 4.80000001 | -0.27652E-01 | -0.22300E-01 |
| 242 | 4.82000001 | -0.27212E-01 | -0.22000E-01 |
| 243 | 4.84000001 | -0.26778E-01 | -0.21700E-01 |
| 244 | 4.86000001 | -0.26344E-01 | -0.21700E-01 |
| 245 | 4.88000001 | -0.25910E-01 | -0.21700E-01 |
| 246 | 4.90000001 | -0.25476E-01 | -0.21700E-01 |
| 247 | 4.92000001 | -0.25042E-01 | -0.21700E-01 |
| 248 | 4.94000001 | -0.24608E-01 | -0.21700E-01 |
| 249 | 4.96000001 | -0.24174E-01 | -0.21700E-01 |
| 250 | 4.98000001 | -0.23744E-01 | -0.21500E-01 |
| 251 | 5.00000001 | -0.23324E-01 | -0.21000E-01 |
| 252 | 5.02000001 | -0.22914E-01 | -0.20500E-01 |
| 253 | 5.04000001 | -0.22510E-01 | -0.20200E-01 |
| 254 | 5.06000001 | -0.22112E-01 | -0.19900E-01 |
| 255 | 5.08000001 | -0.21718E-01 | -0.19700E-01 |
| 256 | 5.10000001 | -0.21330E-01 | -0.19400E-01 |
| 257 | 5.12000001 | -0.20948E-01 | -0.19100E-01 |
| 258 | 5.14000001 | -0.20572E-01 | -0.18800E-01 |
| 259 | 5.16000001 | -0.20220E-01 | -0.17600E-01 |

|     |            |              |              |
|-----|------------|--------------|--------------|
| 260 | 5.18000001 | -0.19892E-01 | -0.16400E-01 |
| 261 | 5.20000001 | -0.19568E-01 | -0.16200E-01 |
| 262 | 5.22000001 | -0.19248E-01 | -0.16000E-01 |
| 263 | 5.24000001 | -0.18930E-01 | -0.15900E-01 |
| 264 | 5.26000001 | -0.18616E-01 | -0.15700E-01 |
| 265 | 5.28000001 | -0.18306E-01 | -0.15500E-01 |
| 266 | 5.30000001 | -0.17998E-01 | -0.15400E-01 |
| 267 | 5.32000001 | -0.17694E-01 | -0.15200E-01 |
| 268 | 5.34000001 | -0.17394E-01 | -0.15000E-01 |
| 269 | 5.36000001 | -0.17096E-01 | -0.14900E-01 |
| 270 | 5.38000001 | -0.16802E-01 | -0.14700E-01 |
| 271 | 5.40000001 | -0.16510E-01 | -0.14600E-01 |
| 272 | 5.42000001 | -0.16224E-01 | -0.14300E-01 |
| 273 | 5.44000001 | -0.15942E-01 | -0.14100E-01 |
| 274 | 5.46000001 | -0.15666E-01 | -0.13800E-01 |
| 275 | 5.48000001 | -0.15396E-01 | -0.13500E-01 |
| 276 | 5.50000001 | -0.15130E-01 | -0.13300E-01 |
| 277 | 5.52000001 | -0.14870E-01 | -0.13000E-01 |
| 278 | 5.54000001 | -0.14616E-01 | -0.12700E-01 |
| 279 | 5.56000001 | -0.14366E-01 | -0.12500E-01 |
| 280 | 5.58000001 | -0.14122E-01 | -0.12200E-01 |
| 281 | 5.60000001 | -0.13884E-01 | -0.11900E-01 |
| 282 | 5.62000001 | -0.13648E-01 | -0.11800E-01 |
| 283 | 5.64000001 | -0.13416E-01 | -0.11600E-01 |
| 284 | 5.66000001 | -0.13188E-01 | -0.11400E-01 |
| 285 | 5.68000001 | -0.12964E-01 | -0.11200E-01 |
| 286 | 5.70000001 | -0.12764E-01 | -0.10000E-01 |
| 287 | 5.72000001 | -0.12582E-01 | -0.91100E-02 |
| 288 | 5.74000001 | -0.12404E-01 | -0.89000E-02 |
| 289 | 5.76000001 | -0.12230E-01 | -0.86900E-02 |
| 290 | 5.78000001 | -0.12063E-01 | -0.83400E-02 |
| 291 | 5.80000001 | -0.11899E-01 | -0.82400E-02 |
| 292 | 5.82000001 | -0.11736E-01 | -0.81400E-02 |
| 293 | 5.84000001 | -0.11575E-01 | -0.80400E-02 |
| 294 | 5.86000001 | -0.11416E-01 | -0.79400E-02 |
| 295 | 5.88000001 | -0.11259E-01 | -0.78400E-02 |
| 296 | 5.90000001 | -0.11105E-01 | -0.77400E-02 |
| 297 | 5.92000001 | -0.10952E-01 | -0.76400E-02 |
| 298 | 5.94000001 | -0.10802E-01 | -0.74800E-02 |
| 299 | 5.96000001 | -0.10656E-01 | -0.73200E-02 |
| 300 | 5.98000001 | -0.10513E-01 | -0.71600E-02 |
| 301 | 6.00000001 | -0.10373E-01 | -0.70000E-02 |
| 302 | 6.02000001 | -0.10236E-01 | -0.68500E-02 |
| 303 | 6.04000001 | -0.10102E-01 | -0.66900E-02 |
| 304 | 6.06000001 | -0.99684E-02 | -0.66700E-02 |
| 305 | 6.08000001 | -0.98362E-02 | -0.66100E-02 |
| 306 | 6.10000001 | -0.97052E-02 | -0.65500E-02 |
| 307 | 6.12000001 | -0.95754E-02 | -0.64900E-02 |
| 308 | 6.14000001 | -0.94468E-02 | -0.64300E-02 |
| 309 | 6.16000001 | -0.93194E-02 | -0.63700E-02 |
| 310 | 6.18000001 | -0.91930E-02 | -0.63200E-02 |
| 311 | 6.20000001 | -0.90678E-02 | -0.62600E-02 |
| 312 | 6.22000001 | -0.89436E-02 | -0.62100E-02 |
| 313 | 6.24000001 | -0.88214E-02 | -0.61100E-02 |
| 314 | 6.26000001 | -0.87012E-02 | -0.60100E-02 |
| 315 | 6.28000001 | -0.85830E-02 | -0.59100E-02 |
| 316 | 6.30000001 | -0.84682E-02 | -0.57400E-02 |
| 317 | 6.32000001 | -0.83564E-02 | -0.55900E-02 |
| 318 | 6.34000001 | -0.82476E-02 | -0.54400E-02 |
| 319 | 6.36000001 | -0.81418E-02 | -0.52900E-02 |
| 320 | 6.38000001 | -0.80394E-02 | -0.51200E-02 |
| 321 | 6.40000001 | -0.79380E-02 | -0.50700E-02 |
| 322 | 6.42000001 | -0.78376E-02 | -0.50200E-02 |
| 323 | 6.44000001 | -0.77382E-02 | -0.49700E-02 |
| 324 | 6.46000001 | -0.76398E-02 | -0.49200E-02 |
| 325 | 6.48000001 | -0.75424E-02 | -0.48700E-02 |

|     |           |              |              |
|-----|-----------|--------------|--------------|
| 326 | 6.5000001 | -0.74460E-02 | -0.48200E-02 |
| 327 | 6.5200001 | -0.73506E-02 | -0.47700E-02 |
| 328 | 6.5400001 | -0.72562E-02 | -0.47200E-02 |
| 329 | 6.5600001 | -0.71628E-02 | -0.46700E-02 |
| 330 | 6.5800001 | -0.70704E-02 | -0.46200E-02 |
| 331 | 6.6000001 | -0.69790E-02 | -0.45700E-02 |
| 332 | 6.6200001 | -0.68886E-02 | -0.45200E-02 |
| 333 | 6.6400001 | -0.67992E-02 | -0.44700E-02 |
| 334 | 6.6600001 | -0.67116E-02 | -0.43800E-02 |
| 335 | 6.6800001 | -0.66254E-02 | -0.43100E-02 |
| 336 | 6.7000001 | -0.65406E-02 | -0.42400E-02 |
| 337 | 6.7200001 | -0.64572E-02 | -0.41700E-02 |
| 338 | 6.7400001 | -0.63752E-02 | -0.41000E-02 |
| 339 | 6.7600001 | -0.62946E-02 | -0.40300E-02 |
| 340 | 6.7800001 | -0.62154E-02 | -0.39600E-02 |
| 341 | 6.8000001 | -0.61376E-02 | -0.38900E-02 |
| 342 | 6.8200001 | -0.60612E-02 | -0.38200E-02 |
| 343 | 6.8400001 | -0.59862E-02 | -0.37500E-02 |
| 344 | 6.8600001 | -0.59136E-02 | -0.36300E-02 |
| 345 | 6.8800001 | -0.58440E-02 | -0.34800E-02 |
| 346 | 6.9000001 | -0.57772E-02 | -0.33400E-02 |
| 347 | 6.9200001 | -0.57134E-02 | -0.31900E-02 |
| 348 | 6.9400001 | -0.56524E-02 | -0.30500E-02 |
| 349 | 6.9600001 | -0.55930E-02 | -0.29700E-02 |
| 350 | 6.9800001 | -0.55340E-02 | -0.29500E-02 |
| 351 | 7.0000001 | -0.54754E-02 | -0.29300E-02 |
| 352 | 7.0200001 | -0.54172E-02 | -0.29100E-02 |
| 353 | 7.0400001 | -0.53594E-02 | -0.28900E-02 |
| 354 | 7.0600001 | -0.53020E-02 | -0.28700E-02 |
| 355 | 7.0800001 | -0.52450E-02 | -0.28500E-02 |
| 356 | 7.1000001 | -0.51884E-02 | -0.28300E-02 |
| 357 | 7.1200001 | -0.51322E-02 | -0.28100E-02 |
| 358 | 7.1400001 | -0.50764E-02 | -0.27900E-02 |
| 359 | 7.1600001 | -0.50210E-02 | -0.27700E-02 |
| 360 | 7.1800001 | -0.49658E-02 | -0.27600E-02 |
| 361 | 7.2000001 | -0.49108E-02 | -0.27500E-02 |
| 362 | 7.2200001 | -0.48562E-02 | -0.27300E-02 |
| 363 | 7.2400001 | -0.48020E-02 | -0.27100E-02 |
| 364 | 7.2600001 | -0.47482E-02 | -0.26900E-02 |
| 365 | 7.2800001 | -0.46948E-02 | -0.26700E-02 |
| 366 | 7.3000001 | -0.46416E-02 | -0.26600E-02 |
| 367 | 7.3200001 | -0.45888E-02 | -0.26400E-02 |
| 368 | 7.3400001 | -0.45364E-02 | -0.26200E-02 |
| 369 | 7.3600001 | -0.44844E-02 | -0.26000E-02 |
| 370 | 7.3800001 | -0.44328E-02 | -0.25800E-02 |
| 371 | 7.4000001 | -0.43816E-02 | -0.25600E-02 |
| 372 | 7.4200001 | -0.43308E-02 | -0.25400E-02 |
| 373 | 7.4400001 | -0.42802E-02 | -0.25300E-02 |
| 374 | 7.4600001 | -0.42300E-02 | -0.25100E-02 |
| 375 | 7.4800001 | -0.41802E-02 | -0.24900E-02 |
| 376 | 7.5000001 | -0.41308E-02 | -0.24700E-02 |
| 377 | 7.5200001 | -0.40818E-02 | -0.24500E-02 |
| 378 | 7.5400001 | -0.40332E-02 | -0.24300E-02 |
| 379 | 7.5600001 | -0.39850E-02 | -0.24100E-02 |
| 380 | 7.5800001 | -0.39370E-02 | -0.24000E-02 |
| 381 | 7.6000001 | -0.38894E-02 | -0.23800E-02 |
| 382 | 7.6200001 | -0.38422E-02 | -0.23600E-02 |
| 383 | 7.6400001 | -0.37954E-02 | -0.23400E-02 |
| 384 | 7.6600001 | -0.37490E-02 | -0.23200E-02 |
| 385 | 7.6800001 | -0.37030E-02 | -0.23000E-02 |
| 386 | 7.7000001 | -0.36572E-02 | -0.22900E-02 |
| 387 | 7.7200001 | -0.36118E-02 | -0.22700E-02 |
| 388 | 7.7400001 | -0.35668E-02 | -0.22500E-02 |
| 389 | 7.7600001 | -0.35222E-02 | -0.22300E-02 |
| 390 | 7.7800001 | -0.34780E-02 | -0.22100E-02 |
| 391 | 7.8000001 | -0.34342E-02 | -0.21900E-02 |

|     |           |              |              |
|-----|-----------|--------------|--------------|
| 392 | 7.8200001 | -0.33908E-02 | -0.21700E-02 |
| 393 | 7.8400001 | -0.33476E-02 | -0.21600E-02 |
| 394 | 7.8600001 | -0.33048E-02 | -0.21400E-02 |
| 395 | 7.8800001 | -0.32624E-02 | -0.21200E-02 |
| 396 | 7.9000001 | -0.32204E-02 | -0.21000E-02 |
| 397 | 7.9200001 | -0.31788E-02 | -0.20800E-02 |
| 398 | 7.9400001 | -0.31376E-02 | -0.20600E-02 |
| 399 | 7.9600001 | -0.30968E-02 | -0.20400E-02 |
| 400 | 7.9800001 | -0.30562E-02 | -0.20300E-02 |
| 401 | 8.0000001 | -0.30160E-02 | -0.20100E-02 |
| 402 | 8.0200001 | -0.29762E-02 | -0.19900E-02 |
| 403 | 8.0400001 | -0.29368E-02 | -0.19700E-02 |
| 404 | 8.0600001 | -0.28978E-02 | -0.19500E-02 |
| 405 | 8.0800001 | -0.28592E-02 | -0.19300E-02 |
| 406 | 8.1000001 | -0.28210E-02 | -0.19100E-02 |
| 407 | 8.1200001 | -0.27830E-02 | -0.19000E-02 |
| 408 | 8.1400001 | -0.27454E-02 | -0.18800E-02 |
| 409 | 8.1600001 | -0.27082E-02 | -0.18600E-02 |
| 410 | 8.1800001 | -0.26714E-02 | -0.18400E-02 |
| 411 | 8.2000001 | -0.26350E-02 | -0.18200E-02 |
| 412 | 8.2200001 | -0.25990E-02 | -0.18000E-02 |
| 413 | 8.2400001 | -0.25632E-02 | -0.17900E-02 |
| 414 | 8.2600001 | -0.25278E-02 | -0.17700E-02 |
| 415 | 8.2800001 | -0.24928E-02 | -0.17500E-02 |
| 416 | 8.3000001 | -0.24582E-02 | -0.17300E-02 |
| 417 | 8.3200001 | -0.24240E-02 | -0.17100E-02 |
| 418 | 8.3400001 | -0.23902E-02 | -0.16900E-02 |
| 419 | 8.3600001 | -0.23568E-02 | -0.16700E-02 |
| 420 | 8.3800001 | -0.23236E-02 | -0.16600E-02 |
| 421 | 8.4000001 | -0.22908E-02 | -0.16400E-02 |
| 422 | 8.4200001 | -0.22584E-02 | -0.16200E-02 |
| 423 | 8.4400001 | -0.22264E-02 | -0.16000E-02 |
| 424 | 8.4600001 | -0.21948E-02 | -0.15800E-02 |
| 425 | 8.4800001 | -0.21636E-02 | -0.15600E-02 |
| 426 | 8.5000001 | -0.21328E-02 | -0.15400E-02 |
| 427 | 8.5200001 | -0.21022E-02 | -0.15300E-02 |
| 428 | 8.5400001 | -0.20720E-02 | -0.15100E-02 |
| 429 | 8.5600001 | -0.20422E-02 | -0.14900E-02 |
| 430 | 8.5800001 | -0.20128E-02 | -0.14700E-02 |
| 431 | 8.6000001 | -0.19838E-02 | -0.14500E-02 |
| 432 | 8.6200001 | -0.19552E-02 | -0.14300E-02 |
| 433 | 8.6400001 | -0.19268E-02 | -0.14200E-02 |
| 434 | 8.6600001 | -0.18988E-02 | -0.14000E-02 |
| 435 | 8.6800001 | -0.18712E-02 | -0.13800E-02 |
| 436 | 8.7000001 | -0.18440E-02 | -0.13600E-02 |
| 437 | 8.7200001 | -0.18172E-02 | -0.13400E-02 |
| 438 | 8.7400001 | -0.17908E-02 | -0.13200E-02 |
| 439 | 8.7600001 | -0.17648E-02 | -0.13000E-02 |
| 440 | 8.7800001 | -0.17390E-02 | -0.12900E-02 |
| 441 | 8.8000001 | -0.17136E-02 | -0.12700E-02 |
| 442 | 8.8200001 | -0.16886E-02 | -0.12500E-02 |
| 443 | 8.8400001 | -0.16640E-02 | -0.12300E-02 |
| 444 | 8.8600001 | -0.16398E-02 | -0.12100E-02 |
| 445 | 8.8800001 | -0.16160E-02 | -0.11900E-02 |
| 446 | 8.9000001 | -0.15926E-02 | -0.11700E-02 |
| 447 | 8.9200001 | -0.15694E-02 | -0.11600E-02 |
| 448 | 8.9400001 | -0.15466E-02 | -0.11400E-02 |
| 449 | 8.9600001 | -0.15242E-02 | -0.11200E-02 |
| 450 | 8.9800001 | -0.15022E-02 | -0.11000E-02 |
| 451 | 9.0000001 | -0.14806E-02 | -0.10800E-02 |
| 452 | 9.0200001 | -0.14594E-02 | -0.10600E-02 |
| 453 | 9.0400001 | -0.14384E-02 | -0.10500E-02 |
| 454 | 9.0600001 | -0.14178E-02 | -0.10300E-02 |
| 455 | 9.0800001 | -0.13976E-02 | -0.10100E-02 |
| 456 | 9.1000001 | -0.13778E-02 | -0.99000E-03 |
| 457 | 9.1200001 | -0.13584E-02 | -0.97100E-03 |

|     |             |              |              |
|-----|-------------|--------------|--------------|
| 458 | 9.14000001  | -0.13394E-02 | -0.95300E-03 |
| 459 | 9.16000001  | -0.13207E-02 | -0.93400E-03 |
| 460 | 9.18000001  | -0.13024E-02 | -0.91600E-03 |
| 461 | 9.20000001  | -0.12844E-02 | -0.89700E-03 |
| 462 | 9.22000001  | -0.12668E-02 | -0.87900E-03 |
| 463 | 9.24000001  | -0.12496E-02 | -0.86000E-03 |
| 464 | 9.26000001  | -0.12328E-02 | -0.84200E-03 |
| 465 | 9.28000001  | -0.12163E-02 | -0.82300E-03 |
| 466 | 9.30000001  | -0.12002E-02 | -0.80500E-03 |
| 467 | 9.32000001  | -0.11845E-02 | -0.78600E-03 |
| 468 | 9.34000001  | -0.11698E-02 | -0.73500E-03 |
| 469 | 9.36000001  | -0.11552E-02 | -0.73000E-03 |
| 470 | 9.38000001  | -0.11407E-02 | -0.72500E-03 |
| 471 | 9.40000001  | -0.11263E-02 | -0.72100E-03 |
| 472 | 9.42000001  | -0.11120E-02 | -0.71600E-03 |
| 473 | 9.44000001  | -0.10977E-02 | -0.71200E-03 |
| 474 | 9.46000001  | -0.10836E-02 | -0.70700E-03 |
| 475 | 9.48000001  | -0.10696E-02 | -0.70200E-03 |
| 476 | 9.50000001  | -0.10556E-02 | -0.69800E-03 |
| 477 | 9.52000001  | -0.10417E-02 | -0.69300E-03 |
| 478 | 9.54000001  | -0.10280E-02 | -0.68800E-03 |
| 479 | 9.56000001  | -0.10143E-02 | -0.68400E-03 |
| 480 | 9.58000001  | -0.10007E-02 | -0.67900E-03 |
| 481 | 9.60000001  | -0.98722E-03 | -0.67500E-03 |
| 482 | 9.62000001  | -0.97382E-03 | -0.67000E-03 |
| 483 | 9.64000001  | -0.96052E-03 | -0.66500E-03 |
| 484 | 9.66000001  | -0.94730E-03 | -0.66100E-03 |
| 485 | 9.68000001  | -0.93418E-03 | -0.65600E-03 |
| 486 | 9.70000001  | -0.92116E-03 | -0.65100E-03 |
| 487 | 9.72000001  | -0.90822E-03 | -0.64700E-03 |
| 488 | 9.74000001  | -0.89538E-03 | -0.64200E-03 |
| 489 | 9.76000001  | -0.88262E-03 | -0.63800E-03 |
| 490 | 9.78000001  | -0.86996E-03 | -0.63300E-03 |
| 491 | 9.80000001  | -0.85740E-03 | -0.62800E-03 |
| 492 | 9.82000001  | -0.84492E-03 | -0.62400E-03 |
| 493 | 9.84000001  | -0.83254E-03 | -0.61900E-03 |
| 494 | 9.86000001  | -0.82024E-03 | -0.61500E-03 |
| 495 | 9.88000001  | -0.80804E-03 | -0.61000E-03 |
| 496 | 9.90000001  | -0.79594E-03 | -0.60500E-03 |
| 497 | 9.92000001  | -0.78392E-03 | -0.60100E-03 |
| 498 | 9.94000001  | -0.77200E-03 | -0.59600E-03 |
| 499 | 9.96000001  | -0.76018E-03 | -0.59100E-03 |
| 500 | 9.98000001  | -0.74844E-03 | -0.58700E-03 |
| 501 | 10.00000001 | -0.73680E-03 | -0.58200E-03 |
| 502 | 10.02000001 | -0.72524E-03 | -0.57800E-03 |
| 503 | 10.04000001 | -0.71378E-03 | -0.57300E-03 |
| 504 | 10.06000001 | -0.70242E-03 | -0.56800E-03 |
| 505 | 10.08000001 | -0.69114E-03 | -0.56400E-03 |
| 506 | 10.10000001 | -0.67996E-03 | -0.55900E-03 |
| 507 | 10.12000001 | -0.66888E-03 | -0.55400E-03 |
| 508 | 10.14000001 | -0.65788E-03 | -0.55000E-03 |
| 509 | 10.16000001 | -0.64698E-03 | -0.54500E-03 |
| 510 | 10.18000001 | -0.63616E-03 | -0.54100E-03 |
| 511 | 10.20000001 | -0.62544E-03 | -0.53600E-03 |
| 512 | 10.22000001 | -0.61482E-03 | -0.53100E-03 |
| 513 | 10.24000001 | -0.60428E-03 | -0.52700E-03 |
| 514 | 10.26000001 | -0.59384E-03 | -0.52200E-03 |
| 515 | 10.28000001 | -0.58350E-03 | -0.51700E-03 |
| 516 | 10.30000001 | -0.57324E-03 | -0.51300E-03 |
| 517 | 10.32000001 | -0.56308E-03 | -0.50800E-03 |
| 518 | 10.34000001 | -0.55300E-03 | -0.50400E-03 |
| 519 | 10.36000001 | -0.54302E-03 | -0.49900E-03 |
| 520 | 10.38000001 | -0.53314E-03 | -0.49400E-03 |
| 521 | 10.40000001 | -0.52334E-03 | -0.49000E-03 |
| 522 | 10.42000001 | -0.51364E-03 | -0.48500E-03 |
| 523 | 10.44000001 | -0.50402E-03 | -0.48100E-03 |



|     |            |              |              |
|-----|------------|--------------|--------------|
| 524 | 10.4600001 | -0.49450E-03 | -0.47600E-03 |
| 525 | 10.4800001 | -0.48508E-03 | -0.47100E-03 |
| 526 | 10.5000001 | -0.47574E-03 | -0.46700E-03 |
| 527 | 10.5200001 | -0.46650E-03 | -0.46200E-03 |
| 528 | 10.5400001 | -0.45736E-03 | -0.45700E-03 |
| 529 | 10.5600001 | -0.44830E-03 | -0.45300E-03 |
| 530 | 10.5800001 | -0.43934E-03 | -0.44800E-03 |
| 531 | 10.6000001 | -0.43046E-03 | -0.44400E-03 |
| 532 | 10.6200001 | -0.42168E-03 | -0.43900E-03 |
| 533 | 10.6400001 | -0.41300E-03 | -0.43400E-03 |
| 534 | 10.6600001 | -0.40440E-03 | -0.43000E-03 |
| 535 | 10.6800001 | -0.39590E-03 | -0.42500E-03 |
| 536 | 10.7000001 | -0.38750E-03 | -0.42000E-03 |
| 537 | 10.7200001 | -0.37918E-03 | -0.41600E-03 |
| 538 | 10.7400001 | -0.37096E-03 | -0.41100E-03 |
| 539 | 10.7600001 | -0.36282E-03 | -0.40700E-03 |
| 540 | 10.7800001 | -0.35478E-03 | -0.40200E-03 |
| 541 | 10.8000001 | -0.34684E-03 | -0.39700E-03 |
| 542 | 10.8200001 | -0.33898E-03 | -0.39300E-03 |
| 543 | 10.8400001 | -0.33122E-03 | -0.38800E-03 |
| 544 | 10.8600001 | -0.32354E-03 | -0.38400E-03 |
| 545 | 10.8800001 | -0.31596E-03 | -0.37900E-03 |
| 546 | 10.9000001 | -0.30848E-03 | -0.37400E-03 |
| 547 | 10.9200001 | -0.30108E-03 | -0.37000E-03 |
| 548 | 10.9400001 | -0.29378E-03 | -0.36500E-03 |
| 549 | 10.9600001 | -0.28658E-03 | -0.36000E-03 |
| 550 | 10.9800001 | -0.27946E-03 | -0.35600E-03 |
| 551 | 11.0000001 | -0.27244E-03 | -0.35100E-03 |
| 552 | 11.0200001 | -0.26578E-03 | -0.33300E-03 |
| 553 | 11.0400001 | -0.25914E-03 | -0.33200E-03 |
| 554 | 11.0600001 | -0.25252E-03 | -0.33100E-03 |
| 555 | 11.0800001 | -0.24590E-03 | -0.33100E-03 |
| 556 | 11.1000001 | -0.23930E-03 | -0.33000E-03 |
| 557 | 11.1200001 | -0.23270E-03 | -0.33000E-03 |
| 558 | 11.1400001 | -0.22612E-03 | -0.32900E-03 |
| 559 | 11.1600001 | -0.21954E-03 | -0.32900E-03 |
| 560 | 11.1800001 | -0.21298E-03 | -0.32800E-03 |
| 561 | 11.2000001 | -0.20642E-03 | -0.32800E-03 |
| 562 | 11.2200001 | -0.19988E-03 | -0.32700E-03 |
| 563 | 11.2400001 | -0.19334E-03 | -0.32700E-03 |
| 564 | 11.2600001 | -0.18682E-03 | -0.32600E-03 |
| 565 | 11.2800001 | -0.18030E-03 | -0.32600E-03 |
| 566 | 11.3000001 | -0.17380E-03 | -0.32500E-03 |
| 567 | 11.3200001 | -0.16732E-03 | -0.32400E-03 |
| 568 | 11.3400001 | -0.16084E-03 | -0.32400E-03 |
| 569 | 11.3600001 | -0.15438E-03 | -0.32300E-03 |
| 570 | 11.3800001 | -0.14792E-03 | -0.32300E-03 |
| 571 | 11.4000001 | -0.14148E-03 | -0.32200E-03 |
| 572 | 11.4200001 | -0.13504E-03 | -0.32200E-03 |
| 573 | 11.4400001 | -0.12862E-03 | -0.32100E-03 |
| 574 | 11.4600001 | -0.12220E-03 | -0.32100E-03 |
| 575 | 11.4800001 | -0.11580E-03 | -0.32000E-03 |
| 576 | 11.5000001 | -0.10940E-03 | -0.32000E-03 |
| 577 | 11.5200001 | -0.10302E-03 | -0.31900E-03 |
| 578 | 11.5400001 | -0.96644E-04 | -0.31900E-03 |
| 579 | 11.5600001 | -0.90284E-04 | -0.31800E-03 |
| 580 | 11.5800001 | -0.83944E-04 | -0.31700E-03 |
| 581 | 11.6000001 | -0.77604E-04 | -0.31700E-03 |
| 582 | 11.6200001 | -0.71284E-04 | -0.31600E-03 |
| 583 | 11.6400001 | -0.64964E-04 | -0.31600E-03 |
| 584 | 11.6600001 | -0.58664E-04 | -0.31500E-03 |
| 585 | 11.6800001 | -0.52364E-04 | -0.31500E-03 |
| 586 | 11.7000001 | -0.46084E-04 | -0.31400E-03 |
| 587 | 11.7200001 | -0.39804E-04 | -0.31400E-03 |
| 588 | 11.7400001 | -0.39804E-04 | 0.00000E+00  |
| 589 | 11.7600001 | -0.39804E-04 | 0.00000E+00  |

|     |            |              |              |
|-----|------------|--------------|--------------|
| 590 | 11.7800001 | 0.000000E+00 | 0.000000E+00 |
| 591 | 11.8000001 | 0.000000E+00 | 0.000000E+00 |
| 592 | 11.8200001 | 0.000000E+00 | 0.000000E+00 |
| 593 | 11.8400001 | 0.000000E+00 | 0.000000E+00 |
| 594 | 11.8600001 | 0.000000E+00 | 0.000000E+00 |
| 595 | 11.8800001 | 0.000000E+00 | 0.000000E+00 |
| 596 | 11.9000001 | 0.000000E+00 | 0.000000E+00 |
| 597 | 11.9200001 | 0.000000E+00 | 0.000000E+00 |
| 598 | 11.9400001 | 0.000000E+00 | 0.000000E+00 |
| 599 | 11.9600001 | 0.000000E+00 | 0.000000E+00 |
| 600 | 11.9800001 | 0.000000E+00 | 0.000000E+00 |
