# Supplementary material
Source: MDPI journal article supplement (https://www.mdpi.com/2226-4310/5/1/1)
Supplement: s1 [file s1]

# Tabulated potential for E2-NN

E2-NN

N 600 R 0.0000001 11.9800001

|    |           |             |             |
|----|-----------|-------------|-------------|
| 1  | 0.0000001 | 0.12171E+06 | 0.86700E+05 |
| 2  | 0.0200001 | 0.11999E+06 | 0.86100E+05 |
| 3  | 0.0400001 | 0.11828E+06 | 0.85500E+05 |
| 4  | 0.0600001 | 0.11658E+06 | 0.84900E+05 |
| 5  | 0.0800001 | 0.11490E+06 | 0.84300E+05 |
| 6  | 0.1000001 | 0.11323E+06 | 0.83600E+05 |
| 7  | 0.1200001 | 0.11157E+06 | 0.83000E+05 |
| 8  | 0.1400001 | 0.10992E+06 | 0.82400E+05 |
| 9  | 0.1600001 | 0.10828E+06 | 0.81800E+05 |
| 10 | 0.1800001 | 0.10666E+06 | 0.81200E+05 |
| 11 | 0.2000001 | 0.10505E+06 | 0.80600E+05 |
| 12 | 0.2200001 | 0.10345E+06 | 0.80000E+05 |
| 13 | 0.2400001 | 0.10186E+06 | 0.79400E+05 |
| 14 | 0.2600001 | 0.10028E+06 | 0.78700E+05 |
| 15 | 0.2800001 | 0.98722E+05 | 0.78100E+05 |
| 16 | 0.3000001 | 0.97172E+05 | 0.77500E+05 |
| 17 | 0.3200001 | 0.95634E+05 | 0.76900E+05 |
| 18 | 0.3400001 | 0.94108E+05 | 0.76300E+05 |
| 19 | 0.3600001 | 0.92594E+05 | 0.75700E+05 |
| 20 | 0.3800001 | 0.91092E+05 | 0.75100E+05 |
| 21 | 0.4000001 | 0.89604E+05 | 0.74400E+05 |
| 22 | 0.4200001 | 0.88128E+05 | 0.73800E+05 |
| 23 | 0.4400001 | 0.86664E+05 | 0.73200E+05 |
| 24 | 0.4600001 | 0.85212E+05 | 0.72600E+05 |
| 25 | 0.4800001 | 0.83772E+05 | 0.72000E+05 |
| 26 | 0.5000001 | 0.82344E+05 | 0.71400E+05 |
| 27 | 0.5200001 | 0.80928E+05 | 0.70800E+05 |
| 28 | 0.5400001 | 0.79526E+05 | 0.70100E+05 |
| 29 | 0.5600001 | 0.78136E+05 | 0.69500E+05 |
| 30 | 0.5800001 | 0.76758E+05 | 0.68900E+05 |
| 31 | 0.6000001 | 0.75392E+05 | 0.68300E+05 |
| 32 | 0.6200001 | 0.74038E+05 | 0.67700E+05 |
| 33 | 0.6400001 | 0.72696E+05 | 0.67100E+05 |
| 34 | 0.6600001 | 0.71366E+05 | 0.66500E+05 |
| 35 | 0.6800001 | 0.70050E+05 | 0.65800E+05 |
| 36 | 0.7000001 | 0.68746E+05 | 0.65200E+05 |
| 37 | 0.7200001 | 0.67454E+05 | 0.64600E+05 |
| 38 | 0.7400001 | 0.66174E+05 | 0.64000E+05 |
| 39 | 0.7600001 | 0.64906E+05 | 0.63400E+05 |
| 40 | 0.7800001 | 0.63650E+05 | 0.62800E+05 |
| 41 | 0.8000001 | 0.62406E+05 | 0.62200E+05 |
| 42 | 0.8200001 | 0.61176E+05 | 0.61500E+05 |
| 43 | 0.8400001 | 0.59958E+05 | 0.60900E+05 |
| 44 | 0.8600001 | 0.58752E+05 | 0.60300E+05 |
| 45 | 0.8800001 | 0.57558E+05 | 0.59700E+05 |
| 46 | 0.9000001 | 0.56376E+05 | 0.59100E+05 |
| 47 | 0.9200001 | 0.55206E+05 | 0.58500E+05 |
| 48 | 0.9400001 | 0.54048E+05 | 0.57900E+05 |
| 49 | 0.9600001 | 0.52904E+05 | 0.57200E+05 |
| 50 | 0.9800001 | 0.51772E+05 | 0.56600E+05 |
| 51 | 1.0000001 | 0.50652E+05 | 0.56000E+05 |
| 52 | 1.0200001 | 0.49544E+05 | 0.55400E+05 |
| 53 | 1.0400001 | 0.48448E+05 | 0.54800E+05 |
| 54 | 1.0600001 | 0.47364E+05 | 0.54200E+05 |
| 55 | 1.0800001 | 0.46292E+05 | 0.53600E+05 |
| 56 | 1.1000001 | 0.45234E+05 | 0.52900E+05 |
| 57 | 1.1200001 | 0.44188E+05 | 0.52300E+05 |
| 58 | 1.1400001 | 0.43154E+05 | 0.51700E+05 |
| 59 | 1.1600001 | 0.42132E+05 | 0.51100E+05 |
| 60 | 1.1800001 | 0.41122E+05 | 0.50500E+05 |
| 61 | 1.2000001 | 0.40124E+05 | 0.49900E+05 |

|     |           |             |             |
|-----|-----------|-------------|-------------|
| 62  | 1.2200001 | 0.39138E+05 | 0.49300E+05 |
| 63  | 1.2400001 | 0.38164E+05 | 0.48700E+05 |
| 64  | 1.2600001 | 0.37204E+05 | 0.48000E+05 |
| 65  | 1.2800001 | 0.36256E+05 | 0.47400E+05 |
| 66  | 1.3000001 | 0.35320E+05 | 0.46800E+05 |
| 67  | 1.3200001 | 0.34396E+05 | 0.46200E+05 |
| 68  | 1.3400001 | 0.33484E+05 | 0.45600E+05 |
| 69  | 1.3600001 | 0.32584E+05 | 0.45000E+05 |
| 70  | 1.3800001 | 0.31696E+05 | 0.44400E+05 |
| 71  | 1.4000001 | 0.30822E+05 | 0.43700E+05 |
| 72  | 1.4200001 | 0.29960E+05 | 0.43100E+05 |
| 73  | 1.4400001 | 0.29110E+05 | 0.42500E+05 |
| 74  | 1.4600001 | 0.28272E+05 | 0.41900E+05 |
| 75  | 1.4800001 | 0.27446E+05 | 0.41300E+05 |
| 76  | 1.5000001 | 0.26632E+05 | 0.40700E+05 |
| 77  | 1.5200001 | 0.25830E+05 | 0.40100E+05 |
| 78  | 1.5400001 | 0.25042E+05 | 0.39400E+05 |
| 79  | 1.5600001 | 0.24266E+05 | 0.38800E+05 |
| 80  | 1.5800001 | 0.23502E+05 | 0.38200E+05 |
| 81  | 1.6000001 | 0.22750E+05 | 0.37600E+05 |
| 82  | 1.6200001 | 0.22010E+05 | 0.37000E+05 |
| 83  | 1.6400001 | 0.21282E+05 | 0.36400E+05 |
| 84  | 1.6600001 | 0.20566E+05 | 0.35800E+05 |
| 85  | 1.6800001 | 0.19864E+05 | 0.35100E+05 |
| 86  | 1.7000001 | 0.19174E+05 | 0.34500E+05 |
| 87  | 1.7200001 | 0.18496E+05 | 0.33900E+05 |
| 88  | 1.7400001 | 0.17830E+05 | 0.33300E+05 |
| 89  | 1.7600001 | 0.17176E+05 | 0.32700E+05 |
| 90  | 1.7800001 | 0.16534E+05 | 0.32100E+05 |
| 91  | 1.8000001 | 0.15904E+05 | 0.31500E+05 |
| 92  | 1.8200001 | 0.15288E+05 | 0.30800E+05 |
| 93  | 1.8400001 | 0.14684E+05 | 0.30200E+05 |
| 94  | 1.8600001 | 0.14092E+05 | 0.29600E+05 |
| 95  | 1.8800001 | 0.13512E+05 | 0.29000E+05 |
| 96  | 1.9000001 | 0.12944E+05 | 0.28400E+05 |
| 97  | 1.9200001 | 0.12388E+05 | 0.27800E+05 |
| 98  | 1.9400001 | 0.11844E+05 | 0.27200E+05 |
| 99  | 1.9600001 | 0.11314E+05 | 0.26500E+05 |
| 100 | 1.9800001 | 0.10796E+05 | 0.25900E+05 |
| 101 | 2.0000001 | 0.10290E+05 | 0.25300E+05 |
| 102 | 2.0200001 | 0.97960E+04 | 0.24700E+05 |
| 103 | 2.0400001 | 0.93140E+04 | 0.24100E+05 |
| 104 | 2.0600001 | 0.88440E+04 | 0.23500E+05 |
| 105 | 2.0800001 | 0.83860E+04 | 0.22900E+05 |
| 106 | 2.1000001 | 0.79420E+04 | 0.22200E+05 |
| 107 | 2.1200001 | 0.75100E+04 | 0.21600E+05 |
| 108 | 2.1400001 | 0.70900E+04 | 0.21000E+05 |
| 109 | 2.1600001 | 0.66820E+04 | 0.20400E+05 |
| 110 | 2.1800001 | 0.62860E+04 | 0.19800E+05 |
| 111 | 2.2000001 | 0.59020E+04 | 0.19200E+05 |
| 112 | 2.2200001 | 0.55300E+04 | 0.18600E+05 |
| 113 | 2.2400001 | 0.51700E+04 | 0.18000E+05 |
| 114 | 2.2600001 | 0.48240E+04 | 0.17300E+05 |
| 115 | 2.2800001 | 0.44900E+04 | 0.16700E+05 |
| 116 | 2.3000001 | 0.41680E+04 | 0.16100E+05 |
| 117 | 2.3200001 | 0.38580E+04 | 0.15500E+05 |
| 118 | 2.3400001 | 0.35600E+04 | 0.14900E+05 |
| 119 | 2.3600001 | 0.32740E+04 | 0.14300E+05 |
| 120 | 2.3800001 | 0.30000E+04 | 0.13700E+05 |
| 121 | 2.4000001 | 0.27400E+04 | 0.13000E+05 |
| 122 | 2.4200001 | 0.24920E+04 | 0.12400E+05 |
| 123 | 2.4400001 | 0.22560E+04 | 0.11800E+05 |
| 124 | 2.4600001 | 0.20320E+04 | 0.11200E+05 |
| 125 | 2.4800001 | 0.18200E+04 | 0.10600E+05 |
| 126 | 2.5000001 | 0.16206E+04 | 0.99700E+04 |
| 127 | 2.5200001 | 0.14336E+04 | 0.93500E+04 |

|     |           |             |             |
|-----|-----------|-------------|-------------|
| 128 | 2.5400001 | 0.12588E+04 | 0.87400E+04 |
| 129 | 2.5600001 | 0.10962E+04 | 0.81300E+04 |
| 130 | 2.5800001 | 0.94601E+03 | 0.75100E+04 |
| 131 | 2.6000001 | 0.80801E+03 | 0.69000E+04 |
| 132 | 2.6200001 | 0.68241E+03 | 0.62800E+04 |
| 133 | 2.6400001 | 0.56901E+03 | 0.56700E+04 |
| 134 | 2.6600001 | 0.46781E+03 | 0.50600E+04 |
| 135 | 2.6800001 | 0.37901E+03 | 0.44400E+04 |
| 136 | 2.7000001 | 0.30241E+03 | 0.38300E+04 |
| 137 | 2.7200001 | 0.23821E+03 | 0.32100E+04 |
| 138 | 2.7400001 | 0.18621E+03 | 0.26000E+04 |
| 139 | 2.7600001 | 0.14641E+03 | 0.19900E+04 |
| 140 | 2.7800001 | 0.11581E+03 | 0.15300E+04 |
| 141 | 2.8000001 | 0.92208E+02 | 0.11800E+04 |
| 142 | 2.8200001 | 0.73788E+02 | 0.92100E+03 |
| 143 | 2.8400001 | 0.59348E+02 | 0.72200E+03 |
| 144 | 2.8600001 | 0.47968E+02 | 0.56900E+03 |
| 145 | 2.8800001 | 0.38968E+02 | 0.45000E+03 |
| 146 | 2.9000001 | 0.31788E+02 | 0.35900E+03 |
| 147 | 2.9200001 | 0.26048E+02 | 0.28700E+03 |
| 148 | 2.9400001 | 0.21428E+02 | 0.23100E+03 |
| 149 | 2.9600001 | 0.17708E+02 | 0.18600E+03 |
| 150 | 2.9800001 | 0.14688E+02 | 0.15100E+03 |
| 151 | 3.0000001 | 0.12228E+02 | 0.12300E+03 |
| 152 | 3.0200001 | 0.10208E+02 | 0.10100E+03 |
| 153 | 3.0400001 | 0.85503E+01 | 0.82900E+02 |
| 154 | 3.0600001 | 0.71843E+01 | 0.68300E+02 |
| 155 | 3.0800001 | 0.60543E+01 | 0.56500E+02 |
| 156 | 3.1000001 | 0.51163E+01 | 0.46900E+02 |
| 157 | 3.1200001 | 0.43343E+01 | 0.39100E+02 |
| 158 | 3.1400001 | 0.36803E+01 | 0.32700E+02 |
| 159 | 3.1600001 | 0.31323E+01 | 0.27400E+02 |
| 160 | 3.1800001 | 0.26723E+01 | 0.23000E+02 |
| 161 | 3.2000001 | 0.22843E+01 | 0.19400E+02 |
| 162 | 3.2200001 | 0.19563E+01 | 0.16400E+02 |
| 163 | 3.2400001 | 0.16783E+01 | 0.13900E+02 |
| 164 | 3.2600001 | 0.14423E+01 | 0.11800E+02 |
| 165 | 3.2800001 | 0.12403E+01 | 0.10100E+02 |
| 166 | 3.3000001 | 0.10681E+01 | 0.86100E+01 |
| 167 | 3.3200001 | 0.92094E+00 | 0.73600E+01 |
| 168 | 3.3400001 | 0.79474E+00 | 0.63100E+01 |
| 169 | 3.3600001 | 0.68634E+00 | 0.54200E+01 |
| 170 | 3.3800001 | 0.59294E+00 | 0.46700E+01 |
| 171 | 3.4000001 | 0.51234E+00 | 0.40300E+01 |
| 172 | 3.4200001 | 0.44274E+00 | 0.34800E+01 |
| 173 | 3.4400001 | 0.38274E+00 | 0.30000E+01 |
| 174 | 3.4600001 | 0.33054E+00 | 0.26100E+01 |
| 175 | 3.4800001 | 0.28534E+00 | 0.22600E+01 |
| 176 | 3.5000001 | 0.24614E+00 | 0.19600E+01 |
| 177 | 3.5200001 | 0.21194E+00 | 0.17100E+01 |
| 178 | 3.5400001 | 0.18214E+00 | 0.14900E+01 |
| 179 | 3.5600001 | 0.15614E+00 | 0.13000E+01 |
| 180 | 3.5800001 | 0.13354E+00 | 0.11300E+01 |
| 181 | 3.6000001 | 0.11370E+00 | 0.99200E+00 |
| 182 | 3.6200001 | 0.96556E-01 | 0.85700E+00 |
| 183 | 3.6400001 | 0.81476E-01 | 0.75400E+00 |
| 184 | 3.6600001 | 0.68196E-01 | 0.66400E+00 |
| 185 | 3.6800001 | 0.56756E-01 | 0.57200E+00 |
| 186 | 3.7000001 | 0.46576E-01 | 0.50900E+00 |
| 187 | 3.7200001 | 0.37856E-01 | 0.43600E+00 |
| 188 | 3.7400001 | 0.30136E-01 | 0.38600E+00 |
| 189 | 3.7600001 | 0.23276E-01 | 0.34300E+00 |
| 190 | 3.7800001 | 0.17476E-01 | 0.29000E+00 |
| 191 | 3.8000001 | 0.12316E-01 | 0.25800E+00 |
| 192 | 3.8200001 | 0.77161E-02 | 0.23000E+00 |
| 193 | 3.8400001 | 0.38961E-02 | 0.19100E+00 |

|     |            |              |              |
|-----|------------|--------------|--------------|
| 194 | 3.86000001 | 0.37610E-03  | 0.17600E+00  |
| 195 | 3.88000001 | -0.25839E-02 | 0.14800E+00  |
| 196 | 3.90000001 | -0.50639E-02 | 0.12400E+00  |
| 197 | 3.92000001 | -0.73839E-02 | 0.11600E+00  |
| 198 | 3.94000001 | -0.92039E-02 | 0.91000E-01  |
| 199 | 3.96000001 | -0.10954E-01 | 0.87500E-01  |
| 200 | 3.98000001 | -0.12364E-01 | 0.70500E-01  |
| 201 | 4.00000001 | -0.13464E-01 | 0.55000E-01  |
| 202 | 4.02000001 | -0.14378E-01 | 0.45700E-01  |
| 203 | 4.04000001 | -0.15126E-01 | 0.37400E-01  |
| 204 | 4.06000001 | -0.15830E-01 | 0.35200E-01  |
| 205 | 4.08000001 | -0.16506E-01 | 0.33800E-01  |
| 206 | 4.10000001 | -0.16870E-01 | 0.18200E-01  |
| 207 | 4.12000001 | -0.17174E-01 | 0.15200E-01  |
| 208 | 4.14000001 | -0.17450E-01 | 0.13800E-01  |
| 209 | 4.16000001 | -0.17698E-01 | 0.12400E-01  |
| 210 | 4.18000001 | -0.17930E-01 | 0.11600E-01  |
| 211 | 4.20000001 | -0.17958E-01 | 0.14200E-02  |
| 212 | 4.22000001 | -0.17979E-01 | 0.10200E-02  |
| 213 | 4.24000001 | -0.17986E-01 | 0.37200E-03  |
| 214 | 4.26000001 | -0.17821E-01 | -0.82400E-02 |
| 215 | 4.28000001 | -0.17622E-01 | -0.99500E-02 |
| 216 | 4.30000001 | -0.17412E-01 | -0.10500E-01 |
| 217 | 4.32000001 | -0.17158E-01 | -0.12700E-01 |
| 218 | 4.34000001 | -0.16886E-01 | -0.13600E-01 |
| 219 | 4.36000001 | -0.16590E-01 | -0.14800E-01 |
| 220 | 4.38000001 | -0.16270E-01 | -0.16000E-01 |
| 221 | 4.40000001 | -0.15942E-01 | -0.16400E-01 |
| 222 | 4.42000001 | -0.15606E-01 | -0.16800E-01 |
| 223 | 4.44000001 | -0.15260E-01 | -0.17300E-01 |
| 224 | 4.46000001 | -0.14906E-01 | -0.17700E-01 |
| 225 | 4.48000001 | -0.14546E-01 | -0.18000E-01 |
| 226 | 4.50000001 | -0.14180E-01 | -0.18300E-01 |
| 227 | 4.52000001 | -0.13812E-01 | -0.18400E-01 |
| 228 | 4.54000001 | -0.13442E-01 | -0.18500E-01 |
| 229 | 4.56000001 | -0.13172E-01 | -0.13500E-01 |
| 230 | 4.58000001 | -0.12902E-01 | -0.13500E-01 |
| 231 | 4.60000001 | -0.12632E-01 | -0.13500E-01 |
| 232 | 4.62000001 | -0.12364E-01 | -0.13400E-01 |
| 233 | 4.64000001 | -0.12096E-01 | -0.13400E-01 |
| 234 | 4.66000001 | -0.11830E-01 | -0.13300E-01 |
| 235 | 4.68000001 | -0.11566E-01 | -0.13200E-01 |
| 236 | 4.70000001 | -0.11304E-01 | -0.13100E-01 |
| 237 | 4.72000001 | -0.11046E-01 | -0.12900E-01 |
| 238 | 4.74000001 | -0.10792E-01 | -0.12700E-01 |
| 239 | 4.76000001 | -0.10542E-01 | -0.12500E-01 |
| 240 | 4.78000001 | -0.10296E-01 | -0.12300E-01 |
| 241 | 4.80000001 | -0.10054E-01 | -0.12100E-01 |
| 242 | 4.82000001 | -0.98163E-02 | -0.11900E-01 |
| 243 | 4.84000001 | -0.95823E-02 | -0.11700E-01 |
| 244 | 4.86000001 | -0.93523E-02 | -0.11500E-01 |
| 245 | 4.88000001 | -0.91263E-02 | -0.11300E-01 |
| 246 | 4.90000001 | -0.89063E-02 | -0.11000E-01 |
| 247 | 4.92000001 | -0.86903E-02 | -0.10800E-01 |
| 248 | 4.94000001 | -0.84783E-02 | -0.10600E-01 |
| 249 | 4.96000001 | -0.82703E-02 | -0.10400E-01 |
| 250 | 4.98000001 | -0.80683E-02 | -0.10100E-01 |
| 251 | 5.00000001 | -0.78699E-02 | -0.99200E-02 |
| 252 | 5.02000001 | -0.76759E-02 | -0.97000E-02 |
| 253 | 5.04000001 | -0.74863E-02 | -0.94800E-02 |
| 254 | 5.06000001 | -0.73011E-02 | -0.92600E-02 |
| 255 | 5.08000001 | -0.71203E-02 | -0.90400E-02 |
| 256 | 5.10000001 | -0.69439E-02 | -0.88200E-02 |
| 257 | 5.12000001 | -0.67721E-02 | -0.85900E-02 |
| 258 | 5.14000001 | -0.66047E-02 | -0.83700E-02 |
| 259 | 5.16000001 | -0.64417E-02 | -0.81500E-02 |

|     |            |              |              |
|-----|------------|--------------|--------------|
| 260 | 5.18000001 | -0.62831E-02 | -0.79300E-02 |
| 261 | 5.20000001 | -0.61289E-02 | -0.77100E-02 |
| 262 | 5.22000001 | -0.59759E-02 | -0.76500E-02 |
| 263 | 5.24000001 | -0.58265E-02 | -0.74700E-02 |
| 264 | 5.26000001 | -0.56799E-02 | -0.73300E-02 |
| 265 | 5.28000001 | -0.55361E-02 | -0.71900E-02 |
| 266 | 5.30000001 | -0.53951E-02 | -0.70500E-02 |
| 267 | 5.32000001 | -0.52569E-02 | -0.69100E-02 |
| 268 | 5.34000001 | -0.51215E-02 | -0.67700E-02 |
| 269 | 5.36000001 | -0.49889E-02 | -0.66300E-02 |
| 270 | 5.38000001 | -0.48591E-02 | -0.64900E-02 |
| 271 | 5.40000001 | -0.47321E-02 | -0.63500E-02 |
| 272 | 5.42000001 | -0.46079E-02 | -0.62100E-02 |
| 273 | 5.44000001 | -0.44865E-02 | -0.60700E-02 |
| 274 | 5.46000001 | -0.43679E-02 | -0.59300E-02 |
| 275 | 5.48000001 | -0.42521E-02 | -0.57900E-02 |
| 276 | 5.50000001 | -0.41391E-02 | -0.56500E-02 |
| 277 | 5.52000001 | -0.40289E-02 | -0.55100E-02 |
| 278 | 5.54000001 | -0.39267E-02 | -0.53700E-02 |
| 279 | 5.56000001 | -0.38271E-02 | -0.52300E-02 |
| 280 | 5.58000001 | -0.37299E-02 | -0.50900E-02 |
| 281 | 5.60000001 | -0.36353E-02 | -0.49500E-02 |
| 282 | 5.62000001 | -0.35431E-02 | -0.48100E-02 |
| 283 | 5.64000001 | -0.34531E-02 | -0.46700E-02 |
| 284 | 5.66000001 | -0.33653E-02 | -0.45300E-02 |
| 285 | 5.68000001 | -0.32799E-02 | -0.43900E-02 |
| 286 | 5.70000001 | -0.31967E-02 | -0.42500E-02 |
| 287 | 5.72000001 | -0.31157E-02 | -0.41100E-02 |
| 288 | 5.74000001 | -0.30367E-02 | -0.39700E-02 |
| 289 | 5.76000001 | -0.29599E-02 | -0.38300E-02 |
| 290 | 5.78000001 | -0.28849E-02 | -0.36900E-02 |
| 291 | 5.80000001 | -0.28117E-02 | -0.35500E-02 |
| 292 | 5.82000001 | -0.27403E-02 | -0.34100E-02 |
| 293 | 5.84000001 | -0.26707E-02 | -0.32700E-02 |
| 294 | 5.86000001 | -0.26029E-02 | -0.31300E-02 |
| 295 | 5.88000001 | -0.25367E-02 | -0.30000E-02 |
| 296 | 5.90000001 | -0.24723E-02 | -0.28700E-02 |
| 297 | 5.92000001 | -0.24095E-02 | -0.27400E-02 |
| 298 | 5.94000001 | -0.23483E-02 | -0.26100E-02 |
| 299 | 5.96000001 | -0.22885E-02 | -0.24800E-02 |
| 300 | 5.98000001 | -0.22303E-02 | -0.23500E-02 |
| 301 | 6.00000001 | -0.21735E-02 | -0.22200E-02 |
| 302 | 6.02000001 | -0.21183E-02 | -0.21000E-02 |
| 303 | 6.04000001 | -0.20645E-02 | -0.19800E-02 |
| 304 | 6.06000001 | -0.20119E-02 | -0.18600E-02 |
| 305 | 6.08000001 | -0.19607E-02 | -0.17500E-02 |
| 306 | 6.10000001 | -0.19107E-02 | -0.16400E-02 |
| 307 | 6.12000001 | -0.18621E-02 | -0.15300E-02 |
| 308 | 6.14000001 | -0.18147E-02 | -0.14300E-02 |
| 309 | 6.16000001 | -0.17685E-02 | -0.13300E-02 |
| 310 | 6.18000001 | -0.17233E-02 | -0.12300E-02 |
| 311 | 6.20000001 | -0.16793E-02 | -0.11400E-02 |
| 312 | 6.22000001 | -0.16363E-02 | -0.10500E-02 |
| 313 | 6.24000001 | -0.15945E-02 | -0.09600E-02 |
| 314 | 6.26000001 | -0.15537E-02 | -0.08700E-02 |
| 315 | 6.28000001 | -0.15139E-02 | -0.07800E-02 |
| 316 | 6.30000001 | -0.14751E-02 | -0.07000E-02 |
| 317 | 6.32000001 | -0.14373E-02 | -0.06200E-02 |
| 318 | 6.34000001 | -0.14005E-02 | -0.05400E-02 |
| 319 | 6.36000001 | -0.13645E-02 | -0.04600E-02 |
| 320 | 6.38000001 | -0.13295E-02 | -0.03900E-02 |
| 321 | 6.40000001 | -0.12953E-02 | -0.03200E-02 |
| 322 | 6.42000001 | -0.12619E-02 | -0.02500E-02 |
| 323 | 6.44000001 | -0.12295E-02 | -0.01800E-02 |
| 324 | 6.46000001 | -0.11979E-02 | -0.01200E-02 |
| 325 | 6.48000001 | -0.11669E-02 | -0.00600E-02 |

|     |           |              |              |
|-----|-----------|--------------|--------------|
| 326 | 6.5000001 | -0.11367E-02 | -0.15100E-02 |
| 327 | 6.5200001 | -0.11073E-02 | -0.14700E-02 |
| 328 | 6.5400001 | -0.10787E-02 | -0.14300E-02 |
| 329 | 6.5600001 | -0.10507E-02 | -0.14000E-02 |
| 330 | 6.5800001 | -0.10233E-02 | -0.13700E-02 |
| 331 | 6.6000001 | -0.99674E-03 | -0.13300E-02 |
| 332 | 6.6200001 | -0.97114E-03 | -0.12800E-02 |
| 333 | 6.6400001 | -0.94594E-03 | -0.12600E-02 |
| 334 | 6.6600001 | -0.92134E-03 | -0.12300E-02 |
| 335 | 6.6800001 | -0.89734E-03 | -0.12000E-02 |
| 336 | 6.7000001 | -0.87394E-03 | -0.11700E-02 |
| 337 | 6.7200001 | -0.85114E-03 | -0.11400E-02 |
| 338 | 6.7400001 | -0.82894E-03 | -0.11100E-02 |
| 339 | 6.7600001 | -0.80714E-03 | -0.10900E-02 |
| 340 | 6.7800001 | -0.78594E-03 | -0.10600E-02 |
| 341 | 6.8000001 | -0.76534E-03 | -0.10300E-02 |
| 342 | 6.8200001 | -0.74534E-03 | -0.10000E-02 |
| 343 | 6.8400001 | -0.72588E-03 | -0.97300E-03 |
| 344 | 6.8600001 | -0.70698E-03 | -0.94500E-03 |
| 345 | 6.8800001 | -0.68836E-03 | -0.93100E-03 |
| 346 | 6.9000001 | -0.67010E-03 | -0.91300E-03 |
| 347 | 6.9200001 | -0.65242E-03 | -0.88400E-03 |
| 348 | 6.9400001 | -0.63530E-03 | -0.85600E-03 |
| 349 | 6.9600001 | -0.61846E-03 | -0.84200E-03 |
| 350 | 6.9800001 | -0.60198E-03 | -0.82400E-03 |
| 351 | 7.0000001 | -0.58588E-03 | -0.80500E-03 |
| 352 | 7.0200001 | -0.57034E-03 | -0.77700E-03 |
| 353 | 7.0400001 | -0.55508E-03 | -0.76300E-03 |
| 354 | 7.0600001 | -0.54028E-03 | -0.74000E-03 |
| 355 | 7.0800001 | -0.52596E-03 | -0.71600E-03 |
| 356 | 7.1000001 | -0.51190E-03 | -0.70300E-03 |
| 357 | 7.1200001 | -0.49812E-03 | -0.68900E-03 |
| 358 | 7.1400001 | -0.48480E-03 | -0.66600E-03 |
| 359 | 7.1600001 | -0.47196E-03 | -0.64200E-03 |
| 360 | 7.1800001 | -0.45920E-03 | -0.63800E-03 |
| 361 | 7.2000001 | -0.44680E-03 | -0.62000E-03 |
| 362 | 7.2200001 | -0.43478E-03 | -0.60100E-03 |
| 363 | 7.2400001 | -0.42296E-03 | -0.59100E-03 |
| 364 | 7.2600001 | -0.41150E-03 | -0.57300E-03 |
| 365 | 7.2800001 | -0.40032E-03 | -0.55900E-03 |
| 366 | 7.3000001 | -0.38944E-03 | -0.54400E-03 |
| 367 | 7.3200001 | -0.37886E-03 | -0.52900E-03 |
| 368 | 7.3400001 | -0.36854E-03 | -0.51600E-03 |
| 369 | 7.3600001 | -0.35848E-03 | -0.50300E-03 |
| 370 | 7.3800001 | -0.34868E-03 | -0.49000E-03 |
| 371 | 7.4000001 | -0.33914E-03 | -0.47700E-03 |
| 372 | 7.4200001 | -0.32984E-03 | -0.46500E-03 |
| 373 | 7.4400001 | -0.32080E-03 | -0.45200E-03 |
| 374 | 7.4600001 | -0.31200E-03 | -0.44000E-03 |
| 375 | 7.4800001 | -0.30342E-03 | -0.42900E-03 |
| 376 | 7.5000001 | -0.29506E-03 | -0.41800E-03 |
| 377 | 7.5200001 | -0.28694E-03 | -0.40600E-03 |
| 378 | 7.5400001 | -0.27902E-03 | -0.39600E-03 |
| 379 | 7.5600001 | -0.27132E-03 | -0.38500E-03 |
| 380 | 7.5800001 | -0.26384E-03 | -0.37400E-03 |
| 381 | 7.6000001 | -0.25656E-03 | -0.36400E-03 |
| 382 | 7.6200001 | -0.24948E-03 | -0.35400E-03 |
| 383 | 7.6400001 | -0.24258E-03 | -0.34500E-03 |
| 384 | 7.6600001 | -0.23588E-03 | -0.33500E-03 |
| 385 | 7.6800001 | -0.22936E-03 | -0.32600E-03 |
| 386 | 7.7000001 | -0.22302E-03 | -0.31700E-03 |
| 387 | 7.7200001 | -0.21686E-03 | -0.30800E-03 |
| 388 | 7.7400001 | -0.21088E-03 | -0.29900E-03 |
| 389 | 7.7600001 | -0.20506E-03 | -0.29100E-03 |
| 390 | 7.7800001 | -0.19940E-03 | -0.28300E-03 |
| 391 | 7.8000001 | -0.19390E-03 | -0.27500E-03 |

|     |           |              |              |
|-----|-----------|--------------|--------------|
| 392 | 7.8200001 | -0.18856E-03 | -0.26700E-03 |
| 393 | 7.8400001 | -0.18338E-03 | -0.25900E-03 |
| 394 | 7.8600001 | -0.17834E-03 | -0.25200E-03 |
| 395 | 7.8800001 | -0.17344E-03 | -0.24500E-03 |
| 396 | 7.9000001 | -0.16870E-03 | -0.23700E-03 |
| 397 | 7.9200001 | -0.16412E-03 | -0.22900E-03 |
| 398 | 7.9400001 | -0.15966E-03 | -0.22300E-03 |
| 399 | 7.9600001 | -0.15534E-03 | -0.21600E-03 |
| 400 | 7.9800001 | -0.15114E-03 | -0.21000E-03 |
| 401 | 8.0000001 | -0.14708E-03 | -0.20300E-03 |
| 402 | 8.0200001 | -0.14314E-03 | -0.19700E-03 |
| 403 | 8.0400001 | -0.13932E-03 | -0.19100E-03 |
| 404 | 8.0600001 | -0.13562E-03 | -0.18500E-03 |
| 405 | 8.0800001 | -0.13204E-03 | -0.17900E-03 |
| 406 | 8.1000001 | -0.12858E-03 | -0.17300E-03 |
| 407 | 8.1200001 | -0.12522E-03 | -0.16800E-03 |
| 408 | 8.1400001 | -0.12198E-03 | -0.16200E-03 |
| 409 | 8.1600001 | -0.11884E-03 | -0.15700E-03 |
| 410 | 8.1800001 | -0.11580E-03 | -0.15200E-03 |
| 411 | 8.2000001 | -0.11288E-03 | -0.14600E-03 |
| 412 | 8.2200001 | -0.11006E-03 | -0.14100E-03 |
| 413 | 8.2400001 | -0.10734E-03 | -0.13600E-03 |
| 414 | 8.2600001 | -0.10470E-03 | -0.13200E-03 |
| 415 | 8.2800001 | -0.10216E-03 | -0.12700E-03 |
| 416 | 8.3000001 | -0.99719E-04 | -0.12200E-03 |
| 417 | 8.3200001 | -0.97359E-04 | -0.11800E-03 |
| 418 | 8.3400001 | -0.95099E-04 | -0.11300E-03 |
| 419 | 8.3600001 | -0.92919E-04 | -0.10900E-03 |
| 420 | 8.3800001 | -0.90819E-04 | -0.10500E-03 |
| 421 | 8.4000001 | -0.88799E-04 | -0.10100E-03 |
| 422 | 8.4200001 | -0.86859E-04 | -0.97000E-04 |
| 423 | 8.4400001 | -0.85001E-04 | -0.92900E-04 |
| 424 | 8.4600001 | -0.83225E-04 | -0.88800E-04 |
| 425 | 8.4800001 | -0.81523E-04 | -0.85100E-04 |
| 426 | 8.5000001 | -0.79893E-04 | -0.81500E-04 |
| 427 | 8.5200001 | -0.78335E-04 | -0.77900E-04 |
| 428 | 8.5400001 | -0.76849E-04 | -0.74300E-04 |
| 429 | 8.5600001 | -0.75437E-04 | -0.70600E-04 |
| 430 | 8.5800001 | -0.74079E-04 | -0.67900E-04 |
| 431 | 8.6000001 | -0.72795E-04 | -0.64200E-04 |
| 432 | 8.6200001 | -0.71583E-04 | -0.60600E-04 |
| 433 | 8.6400001 | -0.70425E-04 | -0.57900E-04 |
| 434 | 8.6600001 | -0.69331E-04 | -0.54700E-04 |
| 435 | 8.6800001 | -0.68291E-04 | -0.52000E-04 |
| 436 | 8.7000001 | -0.67315E-04 | -0.48800E-04 |
| 437 | 8.7200001 | -0.66401E-04 | -0.45700E-04 |
| 438 | 8.7400001 | -0.65543E-04 | -0.42900E-04 |
| 439 | 8.7600001 | -0.64739E-04 | -0.40200E-04 |
| 440 | 8.7800001 | -0.63989E-04 | -0.37500E-04 |
| 441 | 8.8000001 | -0.63283E-04 | -0.35300E-04 |
| 442 | 8.8200001 | -0.62641E-04 | -0.32100E-04 |
| 443 | 8.8400001 | -0.62043E-04 | -0.29900E-04 |
| 444 | 8.8600001 | -0.61501E-04 | -0.27100E-04 |
| 445 | 8.8800001 | -0.61003E-04 | -0.24900E-04 |
| 446 | 8.9000001 | -0.60551E-04 | -0.22600E-04 |
| 447 | 8.9200001 | -0.60143E-04 | -0.20400E-04 |
| 448 | 8.9400001 | -0.59791E-04 | -0.17600E-04 |
| 449 | 8.9600001 | -0.59473E-04 | -0.15900E-04 |
| 450 | 8.9800001 | -0.59201E-04 | -0.13600E-04 |
| 451 | 9.0000001 | -0.58973E-04 | -0.11400E-04 |
| 452 | 9.0200001 | -0.58792E-04 | -0.90800E-05 |
| 453 | 9.0400001 | -0.58610E-04 | -0.90800E-05 |
| 454 | 9.0600001 | -0.58428E-04 | -0.90800E-05 |
| 455 | 9.0800001 | -0.58247E-04 | -0.90800E-05 |
| 456 | 9.1000001 | -0.58065E-04 | -0.90800E-05 |
| 457 | 9.1200001 | -0.57884E-04 | -0.90800E-05 |

|     |            |              |              |
|-----|------------|--------------|--------------|
| 458 | 9.1400001  | -0.57702E-04 | -0.90800E-05 |
| 459 | 9.1600001  | -0.57520E-04 | -0.90800E-05 |
| 460 | 9.1800001  | -0.57339E-04 | -0.90800E-05 |
| 461 | 9.2000001  | -0.57157E-04 | -0.90800E-05 |
| 462 | 9.2200001  | -0.56976E-04 | -0.90800E-05 |
| 463 | 9.2400001  | -0.56794E-04 | -0.90800E-05 |
| 464 | 9.2600001  | -0.56612E-04 | -0.90800E-05 |
| 465 | 9.2800001  | -0.56431E-04 | -0.90800E-05 |
| 466 | 9.3000001  | -0.56249E-04 | -0.90800E-05 |
| 467 | 9.3200001  | -0.56068E-04 | -0.90800E-05 |
| 468 | 9.3400001  | -0.55886E-04 | -0.90800E-05 |
| 469 | 9.3600001  | -0.55704E-04 | -0.90800E-05 |
| 470 | 9.3800001  | -0.55523E-04 | -0.90800E-05 |
| 471 | 9.4000001  | -0.55341E-04 | -0.90800E-05 |
| 472 | 9.4200001  | -0.55160E-04 | -0.90800E-05 |
| 473 | 9.4400001  | -0.54978E-04 | -0.90800E-05 |
| 474 | 9.4600001  | -0.54796E-04 | -0.90800E-05 |
| 475 | 9.4800001  | -0.54615E-04 | -0.90800E-05 |
| 476 | 9.5000001  | -0.54433E-04 | -0.90800E-05 |
| 477 | 9.5200001  | -0.54252E-04 | -0.90800E-05 |
| 478 | 9.5400001  | -0.54070E-04 | -0.90800E-05 |
| 479 | 9.5600001  | -0.53888E-04 | -0.90800E-05 |
| 480 | 9.5800001  | -0.53707E-04 | -0.90800E-05 |
| 481 | 9.6000001  | -0.53525E-04 | -0.90800E-05 |
| 482 | 9.6200001  | -0.53344E-04 | -0.90800E-05 |
| 483 | 9.6400001  | -0.53162E-04 | -0.90800E-05 |
| 484 | 9.6600001  | -0.52980E-04 | -0.90800E-05 |
| 485 | 9.6800001  | -0.52799E-04 | -0.90800E-05 |
| 486 | 9.7000001  | -0.52617E-04 | -0.90800E-05 |
| 487 | 9.7200001  | -0.52436E-04 | -0.90800E-05 |
| 488 | 9.7400001  | -0.52254E-04 | -0.90800E-05 |
| 489 | 9.7600001  | -0.52072E-04 | -0.90800E-05 |
| 490 | 9.7800001  | -0.51891E-04 | -0.90800E-05 |
| 491 | 9.8000001  | -0.51709E-04 | -0.90800E-05 |
| 492 | 9.8200001  | -0.51528E-04 | -0.90800E-05 |
| 493 | 9.8400001  | -0.51346E-04 | -0.90800E-05 |
| 494 | 9.8600001  | -0.51164E-04 | -0.90800E-05 |
| 495 | 9.8800001  | -0.50983E-04 | -0.90800E-05 |
| 496 | 9.9000001  | -0.50801E-04 | -0.90800E-05 |
| 497 | 9.9200001  | -0.50620E-04 | -0.90800E-05 |
| 498 | 9.9400001  | -0.50438E-04 | -0.90800E-05 |
| 499 | 9.9600001  | -0.50256E-04 | -0.90800E-05 |
| 500 | 9.9800001  | -0.50075E-04 | -0.90800E-05 |
| 501 | 10.0000001 | -0.49893E-04 | -0.90800E-05 |
| 502 | 10.0200001 | -0.49712E-04 | -0.90800E-05 |
| 503 | 10.0400001 | -0.49530E-04 | -0.90800E-05 |
| 504 | 10.0600001 | -0.49348E-04 | -0.90800E-05 |
| 505 | 10.0800001 | -0.49167E-04 | -0.90800E-05 |
| 506 | 10.1000001 | -0.48985E-04 | -0.90800E-05 |
| 507 | 10.1200001 | -0.48804E-04 | -0.90800E-05 |
| 508 | 10.1400001 | -0.48622E-04 | -0.90800E-05 |
| 509 | 10.1600001 | -0.48440E-04 | -0.90800E-05 |
| 510 | 10.1800001 | -0.48259E-04 | -0.90800E-05 |
| 511 | 10.2000001 | -0.48077E-04 | -0.90800E-05 |
| 512 | 10.2200001 | -0.47896E-04 | -0.90800E-05 |
| 513 | 10.2400001 | -0.47714E-04 | -0.90800E-05 |
| 514 | 10.2600001 | -0.47532E-04 | -0.90800E-05 |
| 515 | 10.2800001 | -0.47351E-04 | -0.90800E-05 |
| 516 | 10.3000001 | -0.47169E-04 | -0.90800E-05 |
| 517 | 10.3200001 | -0.46988E-04 | -0.90800E-05 |
| 518 | 10.3400001 | -0.46806E-04 | -0.90800E-05 |
| 519 | 10.3600001 | -0.46624E-04 | -0.90800E-05 |
| 520 | 10.3800001 | -0.46443E-04 | -0.90800E-05 |
| 521 | 10.4000001 | -0.46261E-04 | -0.90800E-05 |
| 522 | 10.4200001 | -0.46080E-04 | -0.90800E-05 |
| 523 | 10.4400001 | -0.45898E-04 | -0.90800E-05 |



|     |            |              |              |
|-----|------------|--------------|--------------|
| 524 | 10.4600001 | -0.45716E-04 | -0.90800E-05 |
| 525 | 10.4800001 | -0.45535E-04 | -0.90800E-05 |
| 526 | 10.5000001 | -0.45353E-04 | -0.90800E-05 |
| 527 | 10.5200001 | -0.45172E-04 | -0.90800E-05 |
| 528 | 10.5400001 | -0.44990E-04 | -0.90800E-05 |
| 529 | 10.5600001 | -0.44808E-04 | -0.90800E-05 |
| 530 | 10.5800001 | -0.44627E-04 | -0.90800E-05 |
| 531 | 10.6000001 | -0.44445E-04 | -0.90700E-05 |
| 532 | 10.6200001 | -0.44264E-04 | -0.90700E-05 |
| 533 | 10.6400001 | -0.44083E-04 | -0.90700E-05 |
| 534 | 10.6600001 | -0.43901E-04 | -0.90700E-05 |
| 535 | 10.6800001 | -0.43720E-04 | -0.90700E-05 |
| 536 | 10.7000001 | -0.43538E-04 | -0.90700E-05 |
| 537 | 10.7200001 | -0.43357E-04 | -0.90700E-05 |
| 538 | 10.7400001 | -0.43176E-04 | -0.90700E-05 |
| 539 | 10.7600001 | -0.42994E-04 | -0.90700E-05 |
| 540 | 10.7800001 | -0.42813E-04 | -0.90700E-05 |
| 541 | 10.8000001 | -0.42631E-04 | -0.90700E-05 |
| 542 | 10.8200001 | -0.42450E-04 | -0.90700E-05 |
| 543 | 10.8400001 | -0.42269E-04 | -0.90700E-05 |
| 544 | 10.8600001 | -0.42087E-04 | -0.90700E-05 |
| 545 | 10.8800001 | -0.41906E-04 | -0.90700E-05 |
| 546 | 10.9000001 | -0.41724E-04 | -0.90700E-05 |
| 547 | 10.9200001 | -0.41543E-04 | -0.90700E-05 |
| 548 | 10.9400001 | -0.41362E-04 | -0.90700E-05 |
| 549 | 10.9600001 | -0.41180E-04 | -0.90700E-05 |
| 550 | 10.9800001 | -0.40999E-04 | -0.90700E-05 |
| 551 | 11.0000001 | -0.40817E-04 | -0.90700E-05 |
| 552 | 11.0200001 | -0.40636E-04 | -0.90700E-05 |
| 553 | 11.0400001 | -0.40455E-04 | -0.90700E-05 |
| 554 | 11.0600001 | -0.40273E-04 | -0.90700E-05 |
| 555 | 11.0800001 | -0.40092E-04 | -0.90700E-05 |
| 556 | 11.1000001 | -0.39910E-04 | -0.90700E-05 |
| 557 | 11.1200001 | -0.39729E-04 | -0.90700E-05 |
| 558 | 11.1400001 | -0.39548E-04 | -0.90700E-05 |
| 559 | 11.1600001 | -0.39366E-04 | -0.90700E-05 |
| 560 | 11.1800001 | -0.39185E-04 | -0.90700E-05 |
| 561 | 11.2000001 | -0.39003E-04 | -0.90700E-05 |
| 562 | 11.2200001 | -0.38822E-04 | -0.90700E-05 |
| 563 | 11.2400001 | -0.38641E-04 | -0.90700E-05 |
| 564 | 11.2600001 | -0.38459E-04 | -0.90700E-05 |
| 565 | 11.2800001 | -0.38278E-04 | -0.90700E-05 |
| 566 | 11.3000001 | -0.38096E-04 | -0.90700E-05 |
| 567 | 11.3200001 | -0.37915E-04 | -0.90700E-05 |
| 568 | 11.3400001 | -0.37734E-04 | -0.90700E-05 |
| 569 | 11.3600001 | -0.37552E-04 | -0.90700E-05 |
| 570 | 11.3800001 | -0.37371E-04 | -0.90700E-05 |
| 571 | 11.4000001 | -0.37189E-04 | -0.90700E-05 |
| 572 | 11.4200001 | -0.37008E-04 | -0.90700E-05 |
| 573 | 11.4400001 | -0.36827E-04 | -0.90700E-05 |
| 574 | 11.4600001 | -0.36645E-04 | -0.90700E-05 |
| 575 | 11.4800001 | -0.36464E-04 | -0.90700E-05 |
| 576 | 11.5000001 | -0.36282E-04 | -0.90700E-05 |
| 577 | 11.5200001 | -0.36101E-04 | -0.90700E-05 |
| 578 | 11.5400001 | -0.35920E-04 | -0.90700E-05 |
| 579 | 11.5600001 | -0.35738E-04 | -0.90700E-05 |
| 580 | 11.5800001 | -0.35557E-04 | -0.90700E-05 |
| 581 | 11.6000001 | -0.35375E-04 | -0.90700E-05 |
| 582 | 11.6200001 | -0.35194E-04 | -0.90700E-05 |
| 583 | 11.6400001 | -0.35013E-04 | -0.90700E-05 |
| 584 | 11.6600001 | -0.34831E-04 | -0.90700E-05 |
| 585 | 11.6800001 | -0.34650E-04 | -0.90700E-05 |
| 586 | 11.7000001 | -0.34468E-04 | -0.90700E-05 |
| 587 | 11.7200001 | -0.34287E-04 | -0.90700E-05 |
| 588 | 11.7400001 | -0.34287E-04 | 0.00000E+00  |
| 589 | 11.7600001 | -0.34287E-04 | 0.00000E+00  |

|     |            |              |              |
|-----|------------|--------------|--------------|
| 590 | 11.7800001 | 0.000000E+00 | 0.000000E+00 |
| 591 | 11.8000001 | 0.000000E+00 | 0.000000E+00 |
| 592 | 11.8200001 | 0.000000E+00 | 0.000000E+00 |
| 593 | 11.8400001 | 0.000000E+00 | 0.000000E+00 |
| 594 | 11.8600001 | 0.000000E+00 | 0.000000E+00 |
| 595 | 11.8800001 | 0.000000E+00 | 0.000000E+00 |
| 596 | 11.9000001 | 0.000000E+00 | 0.000000E+00 |
| 597 | 11.9200001 | 0.000000E+00 | 0.000000E+00 |
| 598 | 11.9400001 | 0.000000E+00 | 0.000000E+00 |
| 599 | 11.9600001 | 0.000000E+00 | 0.000000E+00 |
| 600 | 11.9800001 | 0.000000E+00 | 0.000000E+00 |
