# Supplementary material
Source: MDPI journal article supplement (https://www.mdpi.com/2226-4310/5/1/1)
Supplement: s1 [file s1]

# Tabulated potential for N1-E2

N1-E2

N 600 R 0.0000001 11.9800001

|    |           |             |             |
|----|-----------|-------------|-------------|
| 1  | 0.0000001 | 0.57990E+05 | 0.48600E+05 |
| 2  | 0.0200001 | 0.57026E+05 | 0.48200E+05 |
| 3  | 0.0400001 | 0.56070E+05 | 0.47800E+05 |
| 4  | 0.0600001 | 0.55122E+05 | 0.47400E+05 |
| 5  | 0.0800001 | 0.54182E+05 | 0.47000E+05 |
| 6  | 0.1000001 | 0.53250E+05 | 0.46600E+05 |
| 7  | 0.1200001 | 0.52326E+05 | 0.46200E+05 |
| 8  | 0.1400001 | 0.51410E+05 | 0.45800E+05 |
| 9  | 0.1600001 | 0.50502E+05 | 0.45400E+05 |
| 10 | 0.1800001 | 0.49602E+05 | 0.45000E+05 |
| 11 | 0.2000001 | 0.48712E+05 | 0.44500E+05 |
| 12 | 0.2200001 | 0.47830E+05 | 0.44100E+05 |
| 13 | 0.2400001 | 0.46956E+05 | 0.43700E+05 |
| 14 | 0.2600001 | 0.46090E+05 | 0.43300E+05 |
| 15 | 0.2800001 | 0.45232E+05 | 0.42900E+05 |
| 16 | 0.3000001 | 0.44382E+05 | 0.42500E+05 |
| 17 | 0.3200001 | 0.43540E+05 | 0.42100E+05 |
| 18 | 0.3400001 | 0.42706E+05 | 0.41700E+05 |
| 19 | 0.3600001 | 0.41880E+05 | 0.41300E+05 |
| 20 | 0.3800001 | 0.41062E+05 | 0.40900E+05 |
| 21 | 0.4000001 | 0.40252E+05 | 0.40500E+05 |
| 22 | 0.4200001 | 0.39450E+05 | 0.40100E+05 |
| 23 | 0.4400001 | 0.38656E+05 | 0.39700E+05 |
| 24 | 0.4600001 | 0.37870E+05 | 0.39300E+05 |
| 25 | 0.4800001 | 0.37092E+05 | 0.38900E+05 |
| 26 | 0.5000001 | 0.36322E+05 | 0.38500E+05 |
| 27 | 0.5200001 | 0.35560E+05 | 0.38100E+05 |
| 28 | 0.5400001 | 0.34806E+05 | 0.37700E+05 |
| 29 | 0.5600001 | 0.34060E+05 | 0.37300E+05 |
| 30 | 0.5800001 | 0.33322E+05 | 0.36900E+05 |
| 31 | 0.6000001 | 0.32592E+05 | 0.36500E+05 |
| 32 | 0.6200001 | 0.31870E+05 | 0.36100E+05 |
| 33 | 0.6400001 | 0.31156E+05 | 0.35700E+05 |
| 34 | 0.6600001 | 0.30450E+05 | 0.35300E+05 |
| 35 | 0.6800001 | 0.29754E+05 | 0.34800E+05 |
| 36 | 0.7000001 | 0.29066E+05 | 0.34400E+05 |
| 37 | 0.7200001 | 0.28386E+05 | 0.34000E+05 |
| 38 | 0.7400001 | 0.27714E+05 | 0.33600E+05 |
| 39 | 0.7600001 | 0.27050E+05 | 0.33200E+05 |
| 40 | 0.7800001 | 0.26394E+05 | 0.32800E+05 |
| 41 | 0.8000001 | 0.25746E+05 | 0.32400E+05 |
| 42 | 0.8200001 | 0.25106E+05 | 0.32000E+05 |
| 43 | 0.8400001 | 0.24474E+05 | 0.31600E+05 |
| 44 | 0.8600001 | 0.23850E+05 | 0.31200E+05 |
| 45 | 0.8800001 | 0.23234E+05 | 0.30800E+05 |
| 46 | 0.9000001 | 0.22626E+05 | 0.30400E+05 |
| 47 | 0.9200001 | 0.22026E+05 | 0.30000E+05 |
| 48 | 0.9400001 | 0.21434E+05 | 0.29600E+05 |
| 49 | 0.9600001 | 0.20850E+05 | 0.29200E+05 |
| 50 | 0.9800001 | 0.20274E+05 | 0.28800E+05 |
| 51 | 1.0000001 | 0.19706E+05 | 0.28400E+05 |
| 52 | 1.0200001 | 0.19146E+05 | 0.28000E+05 |
| 53 | 1.0400001 | 0.18594E+05 | 0.27600E+05 |
| 54 | 1.0600001 | 0.18050E+05 | 0.27200E+05 |
| 55 | 1.0800001 | 0.17514E+05 | 0.26800E+05 |
| 56 | 1.1000001 | 0.16986E+05 | 0.26400E+05 |
| 57 | 1.1200001 | 0.16466E+05 | 0.26000E+05 |
| 58 | 1.1400001 | 0.15956E+05 | 0.25500E+05 |
| 59 | 1.1600001 | 0.15454E+05 | 0.25100E+05 |
| 60 | 1.1800001 | 0.14960E+05 | 0.24700E+05 |
| 61 | 1.2000001 | 0.14474E+05 | 0.24300E+05 |

|     |           |             |             |
|-----|-----------|-------------|-------------|
| 62  | 1.2200001 | 0.13996E+05 | 0.23900E+05 |
| 63  | 1.2400001 | 0.13526E+05 | 0.23500E+05 |
| 64  | 1.2600001 | 0.13064E+05 | 0.23100E+05 |
| 65  | 1.2800001 | 0.12610E+05 | 0.22700E+05 |
| 66  | 1.3000001 | 0.12164E+05 | 0.22300E+05 |
| 67  | 1.3200001 | 0.11726E+05 | 0.21900E+05 |
| 68  | 1.3400001 | 0.11296E+05 | 0.21500E+05 |
| 69  | 1.3600001 | 0.10874E+05 | 0.21100E+05 |
| 70  | 1.3800001 | 0.10460E+05 | 0.20700E+05 |
| 71  | 1.4000001 | 0.10054E+05 | 0.20300E+05 |
| 72  | 1.4200001 | 0.96556E+04 | 0.19900E+05 |
| 73  | 1.4400001 | 0.92656E+04 | 0.19500E+05 |
| 74  | 1.4600001 | 0.88836E+04 | 0.19100E+05 |
| 75  | 1.4800001 | 0.85096E+04 | 0.18700E+05 |
| 76  | 1.5000001 | 0.81436E+04 | 0.18300E+05 |
| 77  | 1.5200001 | 0.77856E+04 | 0.17900E+05 |
| 78  | 1.5400001 | 0.74356E+04 | 0.17500E+05 |
| 79  | 1.5600001 | 0.70936E+04 | 0.17100E+05 |
| 80  | 1.5800001 | 0.67596E+04 | 0.16700E+05 |
| 81  | 1.6000001 | 0.64336E+04 | 0.16300E+05 |
| 82  | 1.6200001 | 0.61176E+04 | 0.15800E+05 |
| 83  | 1.6400001 | 0.58096E+04 | 0.15400E+05 |
| 84  | 1.6600001 | 0.55096E+04 | 0.15000E+05 |
| 85  | 1.6800001 | 0.52176E+04 | 0.14600E+05 |
| 86  | 1.7000001 | 0.49336E+04 | 0.14200E+05 |
| 87  | 1.7200001 | 0.46576E+04 | 0.13800E+05 |
| 88  | 1.7400001 | 0.43896E+04 | 0.13400E+05 |
| 89  | 1.7600001 | 0.41296E+04 | 0.13000E+05 |
| 90  | 1.7800001 | 0.38776E+04 | 0.12600E+05 |
| 91  | 1.8000001 | 0.36336E+04 | 0.12200E+05 |
| 92  | 1.8200001 | 0.33976E+04 | 0.11800E+05 |
| 93  | 1.8400001 | 0.31696E+04 | 0.11400E+05 |
| 94  | 1.8600001 | 0.29496E+04 | 0.11000E+05 |
| 95  | 1.8800001 | 0.27376E+04 | 0.10600E+05 |
| 96  | 1.9000001 | 0.25336E+04 | 0.10200E+05 |
| 97  | 1.9200001 | 0.23378E+04 | 0.97900E+04 |
| 98  | 1.9400001 | 0.21502E+04 | 0.93800E+04 |
| 99  | 1.9600001 | 0.19706E+04 | 0.89800E+04 |
| 100 | 1.9800001 | 0.17992E+04 | 0.85700E+04 |
| 101 | 2.0000001 | 0.16358E+04 | 0.81700E+04 |
| 102 | 2.0200001 | 0.14806E+04 | 0.77600E+04 |
| 103 | 2.0400001 | 0.13334E+04 | 0.73600E+04 |
| 104 | 2.0600001 | 0.11942E+04 | 0.69600E+04 |
| 105 | 2.0800001 | 0.10632E+04 | 0.65500E+04 |
| 106 | 2.1000001 | 0.94018E+03 | 0.61500E+04 |
| 107 | 2.1200001 | 0.82538E+03 | 0.57400E+04 |
| 108 | 2.1400001 | 0.71858E+03 | 0.53400E+04 |
| 109 | 2.1600001 | 0.61978E+03 | 0.49400E+04 |
| 110 | 2.1800001 | 0.52918E+03 | 0.45300E+04 |
| 111 | 2.2000001 | 0.44658E+03 | 0.41300E+04 |
| 112 | 2.2200001 | 0.37218E+03 | 0.37200E+04 |
| 113 | 2.2400001 | 0.30578E+03 | 0.33200E+04 |
| 114 | 2.2600001 | 0.24758E+03 | 0.29100E+04 |
| 115 | 2.2800001 | 0.19738E+03 | 0.25100E+04 |
| 116 | 2.3000001 | 0.15518E+03 | 0.21100E+04 |
| 117 | 2.3200001 | 0.12118E+03 | 0.17000E+04 |
| 118 | 2.3400001 | 0.95176E+02 | 0.13000E+04 |
| 119 | 2.3600001 | 0.75256E+02 | 0.99600E+03 |
| 120 | 2.3800001 | 0.59856E+02 | 0.77000E+03 |
| 121 | 2.4000001 | 0.47876E+02 | 0.59900E+03 |
| 122 | 2.4200001 | 0.38496E+02 | 0.46900E+03 |
| 123 | 2.4400001 | 0.31116E+02 | 0.36900E+03 |
| 124 | 2.4600001 | 0.25276E+02 | 0.29200E+03 |
| 125 | 2.4800001 | 0.20616E+02 | 0.23300E+03 |
| 126 | 2.5000001 | 0.16896E+02 | 0.18600E+03 |
| 127 | 2.5200001 | 0.13896E+02 | 0.15000E+03 |

|     |           |              |              |
|-----|-----------|--------------|--------------|
| 128 | 2.5400001 | 0.11476E+02  | 0.12100E+03  |
| 129 | 2.5600001 | 0.95155E+01  | 0.98000E+02  |
| 130 | 2.5800001 | 0.79175E+01  | 0.79900E+02  |
| 131 | 2.6000001 | 0.66115E+01  | 0.65300E+02  |
| 132 | 2.6200001 | 0.55375E+01  | 0.53700E+02  |
| 133 | 2.6400001 | 0.46515E+01  | 0.44300E+02  |
| 134 | 2.6600001 | 0.39195E+01  | 0.36600E+02  |
| 135 | 2.6800001 | 0.33115E+01  | 0.30400E+02  |
| 136 | 2.7000001 | 0.28055E+01  | 0.25300E+02  |
| 137 | 2.7200001 | 0.23815E+01  | 0.21200E+02  |
| 138 | 2.7400001 | 0.20255E+01  | 0.17800E+02  |
| 139 | 2.7600001 | 0.17275E+01  | 0.14900E+02  |
| 140 | 2.7800001 | 0.14755E+01  | 0.12600E+02  |
| 141 | 2.8000001 | 0.12615E+01  | 0.10700E+02  |
| 142 | 2.8200001 | 0.10809E+01  | 0.90300E+01  |
| 143 | 2.8400001 | 0.92755E+00  | 0.76700E+01  |
| 144 | 2.8600001 | 0.79675E+00  | 0.65400E+01  |
| 145 | 2.8800001 | 0.68515E+00  | 0.55800E+01  |
| 146 | 2.9000001 | 0.58955E+00  | 0.47800E+01  |
| 147 | 2.9200001 | 0.50755E+00  | 0.41000E+01  |
| 148 | 2.9400001 | 0.43715E+00  | 0.35200E+01  |
| 149 | 2.9600001 | 0.37655E+00  | 0.30300E+01  |
| 150 | 2.9800001 | 0.32435E+00  | 0.26100E+01  |
| 151 | 3.0000001 | 0.27935E+00  | 0.22500E+01  |
| 152 | 3.0200001 | 0.24035E+00  | 0.19500E+01  |
| 153 | 3.0400001 | 0.20655E+00  | 0.16900E+01  |
| 154 | 3.0600001 | 0.17735E+00  | 0.14600E+01  |
| 155 | 3.0800001 | 0.15195E+00  | 0.12700E+01  |
| 156 | 3.1000001 | 0.12995E+00  | 0.11000E+01  |
| 157 | 3.1200001 | 0.11075E+00  | 0.96000E+00  |
| 158 | 3.1400001 | 0.94027E-01  | 0.83600E+00  |
| 159 | 3.1600001 | 0.79467E-01  | 0.72800E+00  |
| 160 | 3.1800001 | 0.66767E-01  | 0.63500E+00  |
| 161 | 3.2000001 | 0.55687E-01  | 0.55400E+00  |
| 162 | 3.2200001 | 0.46027E-01  | 0.48300E+00  |
| 163 | 3.2400001 | 0.37587E-01  | 0.42200E+00  |
| 164 | 3.2600001 | 0.30227E-01  | 0.36800E+00  |
| 165 | 3.2800001 | 0.23807E-01  | 0.32100E+00  |
| 166 | 3.3000001 | 0.18187E-01  | 0.28100E+00  |
| 167 | 3.3200001 | 0.13307E-01  | 0.24400E+00  |
| 168 | 3.3400001 | 0.90466E-02  | 0.21300E+00  |
| 169 | 3.3600001 | 0.53466E-02  | 0.18500E+00  |
| 170 | 3.3800001 | 0.21066E-02  | 0.16200E+00  |
| 171 | 3.4000001 | -0.67339E-03 | 0.13900E+00  |
| 172 | 3.4200001 | -0.30934E-02 | 0.12100E+00  |
| 173 | 3.4400001 | -0.51934E-02 | 0.10500E+00  |
| 174 | 3.4600001 | -0.69914E-02 | 0.89900E-01  |
| 175 | 3.4800001 | -0.85454E-02 | 0.77700E-01  |
| 176 | 3.5000001 | -0.98654E-02 | 0.66000E-01  |
| 177 | 3.5200001 | -0.10989E-01 | 0.56200E-01  |
| 178 | 3.5400001 | -0.11949E-01 | 0.48000E-01  |
| 179 | 3.5600001 | -0.12747E-01 | 0.39900E-01  |
| 180 | 3.5800001 | -0.13419E-01 | 0.33600E-01  |
| 181 | 3.6000001 | -0.13963E-01 | 0.27200E-01  |
| 182 | 3.6200001 | -0.14413E-01 | 0.22500E-01  |
| 183 | 3.6400001 | -0.14763E-01 | 0.17500E-01  |
| 184 | 3.6600001 | -0.15031E-01 | 0.13400E-01  |
| 185 | 3.6800001 | -0.15230E-01 | 0.99200E-02  |
| 186 | 3.7000001 | -0.15366E-01 | 0.68200E-02  |
| 187 | 3.7200001 | -0.15458E-01 | 0.45800E-02  |
| 188 | 3.7400001 | -0.15492E-01 | 0.17300E-02  |
| 189 | 3.7600001 | -0.15475E-01 | -0.86300E-03 |
| 190 | 3.7800001 | -0.15442E-01 | -0.16600E-02 |
| 191 | 3.8000001 | -0.15368E-01 | -0.37000E-02 |
| 192 | 3.8200001 | -0.15267E-01 | -0.50500E-02 |
| 193 | 3.8400001 | -0.15142E-01 | -0.62400E-02 |

|     |            |              |              |
|-----|------------|--------------|--------------|
| 194 | 3.86000001 | -0.15008E-01 | -0.66900E-02 |
| 195 | 3.88000001 | -0.14837E-01 | -0.85800E-02 |
| 196 | 3.90000001 | -0.14661E-01 | -0.87800E-02 |
| 197 | 3.92000001 | -0.14473E-01 | -0.94200E-02 |
| 198 | 3.94000001 | -0.14274E-01 | -0.99200E-02 |
| 199 | 3.96000001 | -0.14068E-01 | -0.10300E-01 |
| 200 | 3.98000001 | -0.13854E-01 | -0.10700E-01 |
| 201 | 4.00000001 | -0.13636E-01 | -0.10900E-01 |
| 202 | 4.02000001 | -0.13414E-01 | -0.11100E-01 |
| 203 | 4.04000001 | -0.13190E-01 | -0.11200E-01 |
| 204 | 4.06000001 | -0.12952E-01 | -0.11900E-01 |
| 205 | 4.08000001 | -0.12714E-01 | -0.11900E-01 |
| 206 | 4.10000001 | -0.12476E-01 | -0.11900E-01 |
| 207 | 4.12000001 | -0.12238E-01 | -0.11900E-01 |
| 208 | 4.14000001 | -0.12000E-01 | -0.11900E-01 |
| 209 | 4.16000001 | -0.11764E-01 | -0.11800E-01 |
| 210 | 4.18000001 | -0.11530E-01 | -0.11700E-01 |
| 211 | 4.20000001 | -0.11298E-01 | -0.11600E-01 |
| 212 | 4.22000001 | -0.11066E-01 | -0.11600E-01 |
| 213 | 4.24000001 | -0.10840E-01 | -0.11300E-01 |
| 214 | 4.26000001 | -0.10620E-01 | -0.11000E-01 |
| 215 | 4.28000001 | -0.10402E-01 | -0.10900E-01 |
| 216 | 4.30000001 | -0.10186E-01 | -0.10800E-01 |
| 217 | 4.32000001 | -0.99723E-02 | -0.10700E-01 |
| 218 | 4.34000001 | -0.97603E-02 | -0.10600E-01 |
| 219 | 4.36000001 | -0.95543E-02 | -0.10300E-01 |
| 220 | 4.38000001 | -0.93543E-02 | -0.10000E-01 |
| 221 | 4.40000001 | -0.91557E-02 | -0.99300E-02 |
| 222 | 4.42000001 | -0.89611E-02 | -0.97300E-02 |
| 223 | 4.44000001 | -0.87703E-02 | -0.95400E-02 |
| 224 | 4.46000001 | -0.85835E-02 | -0.93400E-02 |
| 225 | 4.48000001 | -0.84005E-02 | -0.91500E-02 |
| 226 | 4.50000001 | -0.82213E-02 | -0.89600E-02 |
| 227 | 4.52000001 | -0.80461E-02 | -0.87600E-02 |
| 228 | 4.54000001 | -0.78747E-02 | -0.85700E-02 |
| 229 | 4.56000001 | -0.77069E-02 | -0.83900E-02 |
| 230 | 4.58000001 | -0.75461E-02 | -0.80400E-02 |
| 231 | 4.60000001 | -0.73873E-02 | -0.79400E-02 |
| 232 | 4.62000001 | -0.72307E-02 | -0.78300E-02 |
| 233 | 4.64000001 | -0.70777E-02 | -0.76500E-02 |
| 234 | 4.66000001 | -0.69281E-02 | -0.74800E-02 |
| 235 | 4.68000001 | -0.67821E-02 | -0.73000E-02 |
| 236 | 4.70000001 | -0.66393E-02 | -0.71400E-02 |
| 237 | 4.72000001 | -0.64993E-02 | -0.70000E-02 |
| 238 | 4.74000001 | -0.63631E-02 | -0.68100E-02 |
| 239 | 4.76000001 | -0.62303E-02 | -0.66400E-02 |
| 240 | 4.78000001 | -0.61005E-02 | -0.64900E-02 |
| 241 | 4.80000001 | -0.59739E-02 | -0.63300E-02 |
| 242 | 4.82000001 | -0.58501E-02 | -0.61900E-02 |
| 243 | 4.84000001 | -0.57267E-02 | -0.61700E-02 |
| 244 | 4.86000001 | -0.56037E-02 | -0.61500E-02 |
| 245 | 4.88000001 | -0.54809E-02 | -0.61400E-02 |
| 246 | 4.90000001 | -0.53585E-02 | -0.61200E-02 |
| 247 | 4.92000001 | -0.52589E-02 | -0.49800E-02 |
| 248 | 4.94000001 | -0.51619E-02 | -0.48500E-02 |
| 249 | 4.96000001 | -0.50675E-02 | -0.47200E-02 |
| 250 | 4.98000001 | -0.49755E-02 | -0.46000E-02 |
| 251 | 5.00000001 | -0.48861E-02 | -0.44700E-02 |
| 252 | 5.02000001 | -0.47989E-02 | -0.43600E-02 |
| 253 | 5.04000001 | -0.47119E-02 | -0.43500E-02 |
| 254 | 5.06000001 | -0.46251E-02 | -0.43400E-02 |
| 255 | 5.08000001 | -0.45385E-02 | -0.43300E-02 |
| 256 | 5.10000001 | -0.44521E-02 | -0.43200E-02 |
| 257 | 5.12000001 | -0.43659E-02 | -0.43100E-02 |
| 258 | 5.14000001 | -0.42819E-02 | -0.42000E-02 |
| 259 | 5.16000001 | -0.41997E-02 | -0.41100E-02 |

|     |            |              |              |
|-----|------------|--------------|--------------|
| 260 | 5.18000001 | -0.41195E-02 | -0.40100E-02 |
| 261 | 5.20000001 | -0.40413E-02 | -0.39100E-02 |
| 262 | 5.22000001 | -0.39647E-02 | -0.38300E-02 |
| 263 | 5.24000001 | -0.38901E-02 | -0.37300E-02 |
| 264 | 5.26000001 | -0.38173E-02 | -0.36400E-02 |
| 265 | 5.28000001 | -0.37461E-02 | -0.35600E-02 |
| 266 | 5.30000001 | -0.36765E-02 | -0.34800E-02 |
| 267 | 5.32000001 | -0.36083E-02 | -0.34100E-02 |
| 268 | 5.34000001 | -0.35417E-02 | -0.33300E-02 |
| 269 | 5.36000001 | -0.34767E-02 | -0.32500E-02 |
| 270 | 5.38000001 | -0.34133E-02 | -0.31700E-02 |
| 271 | 5.40000001 | -0.33519E-02 | -0.30700E-02 |
| 272 | 5.42000001 | -0.32917E-02 | -0.30100E-02 |
| 273 | 5.44000001 | -0.32327E-02 | -0.29500E-02 |
| 274 | 5.46000001 | -0.31749E-02 | -0.28900E-02 |
| 275 | 5.48000001 | -0.31191E-02 | -0.27900E-02 |
| 276 | 5.50000001 | -0.30643E-02 | -0.27400E-02 |
| 277 | 5.52000001 | -0.30105E-02 | -0.26900E-02 |
| 278 | 5.54000001 | -0.29577E-02 | -0.26400E-02 |
| 279 | 5.56000001 | -0.29063E-02 | -0.25700E-02 |
| 280 | 5.58000001 | -0.28559E-02 | -0.25200E-02 |
| 281 | 5.60000001 | -0.28069E-02 | -0.24500E-02 |
| 282 | 5.62000001 | -0.27589E-02 | -0.24000E-02 |
| 283 | 5.64000001 | -0.27119E-02 | -0.23500E-02 |
| 284 | 5.66000001 | -0.26659E-02 | -0.23000E-02 |
| 285 | 5.68000001 | -0.26209E-02 | -0.22500E-02 |
| 286 | 5.70000001 | -0.25769E-02 | -0.22000E-02 |
| 287 | 5.72000001 | -0.25337E-02 | -0.21600E-02 |
| 288 | 5.74000001 | -0.24913E-02 | -0.21200E-02 |
| 289 | 5.76000001 | -0.24499E-02 | -0.20700E-02 |
| 290 | 5.78000001 | -0.24095E-02 | -0.20200E-02 |
| 291 | 5.80000001 | -0.23699E-02 | -0.19800E-02 |
| 292 | 5.82000001 | -0.23313E-02 | -0.19300E-02 |
| 293 | 5.84000001 | -0.22933E-02 | -0.19000E-02 |
| 294 | 5.86000001 | -0.22561E-02 | -0.18600E-02 |
| 295 | 5.88000001 | -0.22199E-02 | -0.18100E-02 |
| 296 | 5.90000001 | -0.21843E-02 | -0.17800E-02 |
| 297 | 5.92000001 | -0.21495E-02 | -0.17400E-02 |
| 298 | 5.94000001 | -0.21155E-02 | -0.17000E-02 |
| 299 | 5.96000001 | -0.20821E-02 | -0.16700E-02 |
| 300 | 5.98000001 | -0.20495E-02 | -0.16300E-02 |
| 301 | 6.00000001 | -0.20175E-02 | -0.16000E-02 |
| 302 | 6.02000001 | -0.19861E-02 | -0.15700E-02 |
| 303 | 6.04000001 | -0.19553E-02 | -0.15400E-02 |
| 304 | 6.06000001 | -0.19253E-02 | -0.15000E-02 |
| 305 | 6.08000001 | -0.18957E-02 | -0.14800E-02 |
| 306 | 6.10000001 | -0.18667E-02 | -0.14500E-02 |
| 307 | 6.12000001 | -0.18383E-02 | -0.14200E-02 |
| 308 | 6.14000001 | -0.18105E-02 | -0.13900E-02 |
| 309 | 6.16000001 | -0.17833E-02 | -0.13600E-02 |
| 310 | 6.18000001 | -0.17567E-02 | -0.13300E-02 |
| 311 | 6.20000001 | -0.17305E-02 | -0.13100E-02 |
| 312 | 6.22000001 | -0.17049E-02 | -0.12800E-02 |
| 313 | 6.24000001 | -0.16797E-02 | -0.12600E-02 |
| 314 | 6.26000001 | -0.16551E-02 | -0.12300E-02 |
| 315 | 6.28000001 | -0.16309E-02 | -0.12100E-02 |
| 316 | 6.30000001 | -0.16071E-02 | -0.11900E-02 |
| 317 | 6.32000001 | -0.15837E-02 | -0.11700E-02 |
| 318 | 6.34000001 | -0.15609E-02 | -0.11400E-02 |
| 319 | 6.36000001 | -0.15385E-02 | -0.11200E-02 |
| 320 | 6.38000001 | -0.15165E-02 | -0.11000E-02 |
| 321 | 6.40000001 | -0.14949E-02 | -0.10800E-02 |
| 322 | 6.42000001 | -0.14737E-02 | -0.10600E-02 |
| 323 | 6.44000001 | -0.14529E-02 | -0.10400E-02 |
| 324 | 6.46000001 | -0.14325E-02 | -0.10200E-02 |
| 325 | 6.48000001 | -0.14125E-02 | -0.99900E-03 |

|     |           |              |              |
|-----|-----------|--------------|--------------|
| 326 | 6.5000001 | -0.13929E-02 | -0.98200E-03 |
| 327 | 6.5200001 | -0.13736E-02 | -0.96400E-03 |
| 328 | 6.5400001 | -0.13547E-02 | -0.94600E-03 |
| 329 | 6.5600001 | -0.13361E-02 | -0.92800E-03 |
| 330 | 6.5800001 | -0.13179E-02 | -0.91200E-03 |
| 331 | 6.6000001 | -0.13000E-02 | -0.89600E-03 |
| 332 | 6.6200001 | -0.12824E-02 | -0.88000E-03 |
| 333 | 6.6400001 | -0.12651E-02 | -0.86500E-03 |
| 334 | 6.6600001 | -0.12481E-02 | -0.84900E-03 |
| 335 | 6.6800001 | -0.12314E-02 | -0.83400E-03 |
| 336 | 6.7000001 | -0.12150E-02 | -0.82000E-03 |
| 337 | 6.7200001 | -0.11989E-02 | -0.80500E-03 |
| 338 | 6.7400001 | -0.11831E-02 | -0.79200E-03 |
| 339 | 6.7600001 | -0.11675E-02 | -0.77800E-03 |
| 340 | 6.7800001 | -0.11522E-02 | -0.76500E-03 |
| 341 | 6.8000001 | -0.11372E-02 | -0.75100E-03 |
| 342 | 6.8200001 | -0.11224E-02 | -0.73900E-03 |
| 343 | 6.8400001 | -0.11079E-02 | -0.72600E-03 |
| 344 | 6.8600001 | -0.10936E-02 | -0.71400E-03 |
| 345 | 6.8800001 | -0.10796E-02 | -0.70100E-03 |
| 346 | 6.9000001 | -0.10658E-02 | -0.69000E-03 |
| 347 | 6.9200001 | -0.10522E-02 | -0.67900E-03 |
| 348 | 6.9400001 | -0.10389E-02 | -0.66800E-03 |
| 349 | 6.9600001 | -0.10257E-02 | -0.65700E-03 |
| 350 | 6.9800001 | -0.10128E-02 | -0.64600E-03 |
| 351 | 7.0000001 | -0.10001E-02 | -0.63600E-03 |
| 352 | 7.0200001 | -0.98757E-03 | -0.62600E-03 |
| 353 | 7.0400001 | -0.97527E-03 | -0.61500E-03 |
| 354 | 7.0600001 | -0.96315E-03 | -0.60600E-03 |
| 355 | 7.0800001 | -0.95123E-03 | -0.59600E-03 |
| 356 | 7.1000001 | -0.93951E-03 | -0.58600E-03 |
| 357 | 7.1200001 | -0.92795E-03 | -0.57800E-03 |
| 358 | 7.1400001 | -0.91657E-03 | -0.56900E-03 |
| 359 | 7.1600001 | -0.90539E-03 | -0.55900E-03 |
| 360 | 7.1800001 | -0.89437E-03 | -0.55100E-03 |
| 361 | 7.2000001 | -0.88353E-03 | -0.54200E-03 |
| 362 | 7.2200001 | -0.87285E-03 | -0.53400E-03 |
| 363 | 7.2400001 | -0.86233E-03 | -0.52600E-03 |
| 364 | 7.2600001 | -0.85197E-03 | -0.51800E-03 |
| 365 | 7.2800001 | -0.84177E-03 | -0.51000E-03 |
| 366 | 7.3000001 | -0.83173E-03 | -0.50200E-03 |
| 367 | 7.3200001 | -0.82183E-03 | -0.49500E-03 |
| 368 | 7.3400001 | -0.81209E-03 | -0.48700E-03 |
| 369 | 7.3600001 | -0.80251E-03 | -0.47900E-03 |
| 370 | 7.3800001 | -0.79309E-03 | -0.47100E-03 |
| 371 | 7.4000001 | -0.78381E-03 | -0.46400E-03 |
| 372 | 7.4200001 | -0.77467E-03 | -0.45700E-03 |
| 373 | 7.4400001 | -0.76565E-03 | -0.45100E-03 |
| 374 | 7.4600001 | -0.75675E-03 | -0.44500E-03 |
| 375 | 7.4800001 | -0.74797E-03 | -0.43900E-03 |
| 376 | 7.5000001 | -0.73931E-03 | -0.43300E-03 |
| 377 | 7.5200001 | -0.73077E-03 | -0.42700E-03 |
| 378 | 7.5400001 | -0.72235E-03 | -0.42100E-03 |
| 379 | 7.5600001 | -0.71407E-03 | -0.41400E-03 |
| 380 | 7.5800001 | -0.70591E-03 | -0.40800E-03 |
| 381 | 7.6000001 | -0.69787E-03 | -0.40200E-03 |
| 382 | 7.6200001 | -0.68991E-03 | -0.39800E-03 |
| 383 | 7.6400001 | -0.68205E-03 | -0.39300E-03 |
| 384 | 7.6600001 | -0.67429E-03 | -0.38800E-03 |
| 385 | 7.6800001 | -0.66665E-03 | -0.38200E-03 |
| 386 | 7.7000001 | -0.65911E-03 | -0.37700E-03 |
| 387 | 7.7200001 | -0.65167E-03 | -0.37200E-03 |
| 388 | 7.7400001 | -0.64433E-03 | -0.36700E-03 |
| 389 | 7.7600001 | -0.63709E-03 | -0.36200E-03 |
| 390 | 7.7800001 | -0.62995E-03 | -0.35700E-03 |
| 391 | 7.8000001 | -0.62293E-03 | -0.35100E-03 |

|     |           |              |              |
|-----|-----------|--------------|--------------|
| 392 | 7.8200001 | -0.61597E-03 | -0.34800E-03 |
| 393 | 7.8400001 | -0.60909E-03 | -0.34400E-03 |
| 394 | 7.8600001 | -0.60231E-03 | -0.33900E-03 |
| 395 | 7.8800001 | -0.59561E-03 | -0.33500E-03 |
| 396 | 7.9000001 | -0.58899E-03 | -0.33100E-03 |
| 397 | 7.9200001 | -0.58247E-03 | -0.32600E-03 |
| 398 | 7.9400001 | -0.57603E-03 | -0.32200E-03 |
| 399 | 7.9600001 | -0.56967E-03 | -0.31800E-03 |
| 400 | 7.9800001 | -0.56339E-03 | -0.31400E-03 |
| 401 | 8.0000001 | -0.55719E-03 | -0.31000E-03 |
| 402 | 8.0200001 | -0.55107E-03 | -0.30600E-03 |
| 403 | 8.0400001 | -0.54503E-03 | -0.30200E-03 |
| 404 | 8.0600001 | -0.53907E-03 | -0.29800E-03 |
| 405 | 8.0800001 | -0.53319E-03 | -0.29400E-03 |
| 406 | 8.1000001 | -0.52737E-03 | -0.29100E-03 |
| 407 | 8.1200001 | -0.52161E-03 | -0.28800E-03 |
| 408 | 8.1400001 | -0.51591E-03 | -0.28500E-03 |
| 409 | 8.1600001 | -0.51029E-03 | -0.28100E-03 |
| 410 | 8.1800001 | -0.50473E-03 | -0.27800E-03 |
| 411 | 8.2000001 | -0.49925E-03 | -0.27400E-03 |
| 412 | 8.2200001 | -0.49383E-03 | -0.27100E-03 |
| 413 | 8.2400001 | -0.48847E-03 | -0.26800E-03 |
| 414 | 8.2600001 | -0.48315E-03 | -0.26600E-03 |
| 415 | 8.2800001 | -0.47791E-03 | -0.26200E-03 |
| 416 | 8.3000001 | -0.47273E-03 | -0.25900E-03 |
| 417 | 8.3200001 | -0.46761E-03 | -0.25600E-03 |
| 418 | 8.3400001 | -0.46253E-03 | -0.25400E-03 |
| 419 | 8.3600001 | -0.45751E-03 | -0.25100E-03 |
| 420 | 8.3800001 | -0.45255E-03 | -0.24800E-03 |
| 421 | 8.4000001 | -0.44763E-03 | -0.24600E-03 |
| 422 | 8.4200001 | -0.44277E-03 | -0.24300E-03 |
| 423 | 8.4400001 | -0.43797E-03 | -0.24000E-03 |
| 424 | 8.4600001 | -0.43321E-03 | -0.23800E-03 |
| 425 | 8.4800001 | -0.42851E-03 | -0.23500E-03 |
| 426 | 8.5000001 | -0.42387E-03 | -0.23200E-03 |
| 427 | 8.5200001 | -0.41927E-03 | -0.23000E-03 |
| 428 | 8.5400001 | -0.41473E-03 | -0.22700E-03 |
| 429 | 8.5600001 | -0.41025E-03 | -0.22400E-03 |
| 430 | 8.5800001 | -0.40581E-03 | -0.22200E-03 |
| 431 | 8.6000001 | -0.40141E-03 | -0.22000E-03 |
| 432 | 8.6200001 | -0.39705E-03 | -0.21800E-03 |
| 433 | 8.6400001 | -0.39275E-03 | -0.21500E-03 |
| 434 | 8.6600001 | -0.38849E-03 | -0.21300E-03 |
| 435 | 8.6800001 | -0.38431E-03 | -0.20900E-03 |
| 436 | 8.7000001 | -0.38015E-03 | -0.20800E-03 |
| 437 | 8.7200001 | -0.37603E-03 | -0.20600E-03 |
| 438 | 8.7400001 | -0.37195E-03 | -0.20400E-03 |
| 439 | 8.7600001 | -0.36791E-03 | -0.20200E-03 |
| 440 | 8.7800001 | -0.36391E-03 | -0.20000E-03 |
| 441 | 8.8000001 | -0.35995E-03 | -0.19800E-03 |
| 442 | 8.8200001 | -0.35603E-03 | -0.19600E-03 |
| 443 | 8.8400001 | -0.35215E-03 | -0.19400E-03 |
| 444 | 8.8600001 | -0.34831E-03 | -0.19200E-03 |
| 445 | 8.8800001 | -0.34451E-03 | -0.19000E-03 |
| 446 | 8.9000001 | -0.34075E-03 | -0.18800E-03 |
| 447 | 8.9200001 | -0.33701E-03 | -0.18700E-03 |
| 448 | 8.9400001 | -0.33331E-03 | -0.18500E-03 |
| 449 | 8.9600001 | -0.32965E-03 | -0.18300E-03 |
| 450 | 8.9800001 | -0.32601E-03 | -0.18200E-03 |
| 451 | 9.0000001 | -0.32241E-03 | -0.18000E-03 |
| 452 | 9.0200001 | -0.31885E-03 | -0.17800E-03 |
| 453 | 9.0400001 | -0.31533E-03 | -0.17600E-03 |
| 454 | 9.0600001 | -0.31185E-03 | -0.17400E-03 |
| 455 | 9.0800001 | -0.30839E-03 | -0.17300E-03 |
| 456 | 9.1000001 | -0.30495E-03 | -0.17200E-03 |
| 457 | 9.1200001 | -0.30155E-03 | -0.17000E-03 |

|     |            |              |              |
|-----|------------|--------------|--------------|
| 458 | 9.1400001  | -0.29817E-03 | -0.16900E-03 |
| 459 | 9.1600001  | -0.29483E-03 | -0.16700E-03 |
| 460 | 9.1800001  | -0.29153E-03 | -0.16500E-03 |
| 461 | 9.2000001  | -0.28825E-03 | -0.16400E-03 |
| 462 | 9.2200001  | -0.28501E-03 | -0.16200E-03 |
| 463 | 9.2400001  | -0.28179E-03 | -0.16100E-03 |
| 464 | 9.2600001  | -0.27861E-03 | -0.15900E-03 |
| 465 | 9.2800001  | -0.27545E-03 | -0.15800E-03 |
| 466 | 9.3000001  | -0.27231E-03 | -0.15700E-03 |
| 467 | 9.3200001  | -0.26921E-03 | -0.15500E-03 |
| 468 | 9.3400001  | -0.26613E-03 | -0.15400E-03 |
| 469 | 9.3600001  | -0.26307E-03 | -0.15300E-03 |
| 470 | 9.3800001  | -0.26005E-03 | -0.15100E-03 |
| 471 | 9.4000001  | -0.25705E-03 | -0.15000E-03 |
| 472 | 9.4200001  | -0.25407E-03 | -0.14900E-03 |
| 473 | 9.4400001  | -0.25113E-03 | -0.14700E-03 |
| 474 | 9.4600001  | -0.24821E-03 | -0.14600E-03 |
| 475 | 9.4800001  | -0.24531E-03 | -0.14500E-03 |
| 476 | 9.5000001  | -0.24243E-03 | -0.14400E-03 |
| 477 | 9.5200001  | -0.23957E-03 | -0.14300E-03 |
| 478 | 9.5400001  | -0.23675E-03 | -0.14100E-03 |
| 479 | 9.5600001  | -0.23395E-03 | -0.14000E-03 |
| 480 | 9.5800001  | -0.23117E-03 | -0.13900E-03 |
| 481 | 9.6000001  | -0.22841E-03 | -0.13800E-03 |
| 482 | 9.6200001  | -0.22567E-03 | -0.13700E-03 |
| 483 | 9.6400001  | -0.22295E-03 | -0.13600E-03 |
| 484 | 9.6600001  | -0.22025E-03 | -0.13500E-03 |
| 485 | 9.6800001  | -0.21757E-03 | -0.13400E-03 |
| 486 | 9.7000001  | -0.21491E-03 | -0.13300E-03 |
| 487 | 9.7200001  | -0.21227E-03 | -0.13200E-03 |
| 488 | 9.7400001  | -0.20965E-03 | -0.13100E-03 |
| 489 | 9.7600001  | -0.20705E-03 | -0.13000E-03 |
| 490 | 9.7800001  | -0.20447E-03 | -0.12900E-03 |
| 491 | 9.8000001  | -0.20191E-03 | -0.12800E-03 |
| 492 | 9.8200001  | -0.19937E-03 | -0.12700E-03 |
| 493 | 9.8400001  | -0.19685E-03 | -0.12600E-03 |
| 494 | 9.8600001  | -0.19435E-03 | -0.12500E-03 |
| 495 | 9.8800001  | -0.19187E-03 | -0.12400E-03 |
| 496 | 9.9000001  | -0.18941E-03 | -0.12300E-03 |
| 497 | 9.9200001  | -0.18697E-03 | -0.12200E-03 |
| 498 | 9.9400001  | -0.18455E-03 | -0.12100E-03 |
| 499 | 9.9600001  | -0.18215E-03 | -0.12000E-03 |
| 500 | 9.9800001  | -0.17977E-03 | -0.11900E-03 |
| 501 | 10.0000001 | -0.17741E-03 | -0.11800E-03 |
| 502 | 10.0200001 | -0.17505E-03 | -0.11800E-03 |
| 503 | 10.0400001 | -0.17271E-03 | -0.11700E-03 |
| 504 | 10.0600001 | -0.17039E-03 | -0.11600E-03 |
| 505 | 10.0800001 | -0.16809E-03 | -0.11500E-03 |
| 506 | 10.1000001 | -0.16579E-03 | -0.11500E-03 |
| 507 | 10.1200001 | -0.16351E-03 | -0.11400E-03 |
| 508 | 10.1400001 | -0.16125E-03 | -0.11300E-03 |
| 509 | 10.1600001 | -0.15899E-03 | -0.11300E-03 |
| 510 | 10.1800001 | -0.15675E-03 | -0.11200E-03 |
| 511 | 10.2000001 | -0.15453E-03 | -0.11100E-03 |
| 512 | 10.2200001 | -0.15233E-03 | -0.11000E-03 |
| 513 | 10.2400001 | -0.15015E-03 | -0.10900E-03 |
| 514 | 10.2600001 | -0.14797E-03 | -0.10900E-03 |
| 515 | 10.2800001 | -0.14581E-03 | -0.10800E-03 |
| 516 | 10.3000001 | -0.14365E-03 | -0.10800E-03 |
| 517 | 10.3200001 | -0.14151E-03 | -0.10700E-03 |
| 518 | 10.3400001 | -0.13937E-03 | -0.10700E-03 |
| 519 | 10.3600001 | -0.13725E-03 | -0.10600E-03 |
| 520 | 10.3800001 | -0.13515E-03 | -0.10500E-03 |
| 521 | 10.4000001 | -0.13307E-03 | -0.10400E-03 |
| 522 | 10.4200001 | -0.13101E-03 | -0.10300E-03 |
| 523 | 10.4400001 | -0.12897E-03 | -0.10200E-03 |



|     |            |              |              |
|-----|------------|--------------|--------------|
| 524 | 10.4600001 | -0.12693E-03 | -0.10200E-03 |
| 525 | 10.4800001 | -0.12491E-03 | -0.10100E-03 |
| 526 | 10.5000001 | -0.12289E-03 | -0.10100E-03 |
| 527 | 10.5200001 | -0.12089E-03 | -0.99900E-04 |
| 528 | 10.5400001 | -0.11891E-03 | -0.99200E-04 |
| 529 | 10.5600001 | -0.11694E-03 | -0.98600E-04 |
| 530 | 10.5800001 | -0.11498E-03 | -0.98000E-04 |
| 531 | 10.6000001 | -0.11303E-03 | -0.97400E-04 |
| 532 | 10.6200001 | -0.11109E-03 | -0.96900E-04 |
| 533 | 10.6400001 | -0.10917E-03 | -0.96200E-04 |
| 534 | 10.6600001 | -0.10724E-03 | -0.96100E-04 |
| 535 | 10.6800001 | -0.10532E-03 | -0.96000E-04 |
| 536 | 10.7000001 | -0.10341E-03 | -0.95900E-04 |
| 537 | 10.7200001 | -0.10149E-03 | -0.95800E-04 |
| 538 | 10.7400001 | -0.99576E-04 | -0.95700E-04 |
| 539 | 10.7600001 | -0.97664E-04 | -0.95600E-04 |
| 540 | 10.7800001 | -0.95754E-04 | -0.95500E-04 |
| 541 | 10.8000001 | -0.93846E-04 | -0.95400E-04 |
| 542 | 10.8200001 | -0.91940E-04 | -0.95300E-04 |
| 543 | 10.8400001 | -0.90036E-04 | -0.95200E-04 |
| 544 | 10.8600001 | -0.88134E-04 | -0.95100E-04 |
| 545 | 10.8800001 | -0.86234E-04 | -0.95000E-04 |
| 546 | 10.9000001 | -0.84336E-04 | -0.94900E-04 |
| 547 | 10.9200001 | -0.82448E-04 | -0.94400E-04 |
| 548 | 10.9400001 | -0.80570E-04 | -0.93900E-04 |
| 549 | 10.9600001 | -0.78702E-04 | -0.93400E-04 |
| 550 | 10.9800001 | -0.76834E-04 | -0.93400E-04 |
| 551 | 11.0000001 | -0.74986E-04 | -0.92400E-04 |
| 552 | 11.0200001 | -0.73152E-04 | -0.91700E-04 |
| 553 | 11.0400001 | -0.71330E-04 | -0.91100E-04 |
| 554 | 11.0600001 | -0.69510E-04 | -0.91000E-04 |
| 555 | 11.0800001 | -0.67692E-04 | -0.90900E-04 |
| 556 | 11.1000001 | -0.65898E-04 | -0.89700E-04 |
| 557 | 11.1200001 | -0.64130E-04 | -0.88400E-04 |
| 558 | 11.1400001 | -0.62372E-04 | -0.87900E-04 |
| 559 | 11.1600001 | -0.60616E-04 | -0.87800E-04 |
| 560 | 11.1800001 | -0.58864E-04 | -0.87600E-04 |
| 561 | 11.2000001 | -0.57120E-04 | -0.87200E-04 |
| 562 | 11.2200001 | -0.55402E-04 | -0.85900E-04 |
| 563 | 11.2400001 | -0.53688E-04 | -0.85700E-04 |
| 564 | 11.2600001 | -0.52002E-04 | -0.84300E-04 |
| 565 | 11.2800001 | -0.50334E-04 | -0.83400E-04 |
| 566 | 11.3000001 | -0.48674E-04 | -0.83000E-04 |
| 567 | 11.3200001 | -0.47010E-04 | -0.83200E-04 |
| 568 | 11.3400001 | -0.45354E-04 | -0.82800E-04 |
| 569 | 11.3600001 | -0.43706E-04 | -0.82400E-04 |
| 570 | 11.3800001 | -0.42062E-04 | -0.82200E-04 |
| 571 | 11.4000001 | -0.40442E-04 | -0.81000E-04 |
| 572 | 11.4200001 | -0.38832E-04 | -0.80500E-04 |
| 573 | 11.4400001 | -0.37232E-04 | -0.80000E-04 |
| 574 | 11.4600001 | -0.35644E-04 | -0.79400E-04 |
| 575 | 11.4800001 | -0.34066E-04 | -0.78900E-04 |
| 576 | 11.5000001 | -0.32500E-04 | -0.78300E-04 |
| 577 | 11.5200001 | -0.30944E-04 | -0.77800E-04 |
| 578 | 11.5400001 | -0.29398E-04 | -0.77300E-04 |
| 579 | 11.5600001 | -0.27862E-04 | -0.76800E-04 |
| 580 | 11.5800001 | -0.26336E-04 | -0.76300E-04 |
| 581 | 11.6000001 | -0.24820E-04 | -0.75800E-04 |
| 582 | 11.6200001 | -0.23314E-04 | -0.75300E-04 |
| 583 | 11.6400001 | -0.21818E-04 | -0.74800E-04 |
| 584 | 11.6600001 | -0.20332E-04 | -0.74300E-04 |
| 585 | 11.6800001 | -0.18856E-04 | -0.73800E-04 |
| 586 | 11.7000001 | -0.17390E-04 | -0.73300E-04 |
| 587 | 11.7200001 | -0.15934E-04 | -0.72800E-04 |
| 588 | 11.7400001 | -0.15934E-04 | 0.00000E+00  |
| 589 | 11.7600001 | -0.15934E-04 | 0.00000E+00  |

|     |            |              |              |
|-----|------------|--------------|--------------|
| 590 | 11.7800001 | 0.000000E+00 | 0.000000E+00 |
| 591 | 11.8000001 | 0.000000E+00 | 0.000000E+00 |
| 592 | 11.8200001 | 0.000000E+00 | 0.000000E+00 |
| 593 | 11.8400001 | 0.000000E+00 | 0.000000E+00 |
| 594 | 11.8600001 | 0.000000E+00 | 0.000000E+00 |
| 595 | 11.8800001 | 0.000000E+00 | 0.000000E+00 |
| 596 | 11.9000001 | 0.000000E+00 | 0.000000E+00 |
| 597 | 11.9200001 | 0.000000E+00 | 0.000000E+00 |
| 598 | 11.9400001 | 0.000000E+00 | 0.000000E+00 |
| 599 | 11.9600001 | 0.000000E+00 | 0.000000E+00 |
| 600 | 11.9800001 | 0.000000E+00 | 0.000000E+00 |
