# Supplementary material
Source: MDPI journal article supplement (https://www.mdpi.com/2226-4310/5/1/1)
Supplement: s1 [file s1]

# Tabulated potential for N1-E1

N1-E1

N 600 R 0.0000001 11.9800001

|    |           |             |             |
|----|-----------|-------------|-------------|
| 1  | 0.0000001 | 0.62288E+05 | 0.47900E+05 |
| 2  | 0.0200001 | 0.61338E+05 | 0.47500E+05 |
| 3  | 0.0400001 | 0.60394E+05 | 0.47200E+05 |
| 4  | 0.0600001 | 0.59458E+05 | 0.46800E+05 |
| 5  | 0.0800001 | 0.58530E+05 | 0.46400E+05 |
| 6  | 0.1000001 | 0.57608E+05 | 0.46100E+05 |
| 7  | 0.1200001 | 0.56694E+05 | 0.45700E+05 |
| 8  | 0.1400001 | 0.55788E+05 | 0.45300E+05 |
| 9  | 0.1600001 | 0.54888E+05 | 0.45000E+05 |
| 10 | 0.1800001 | 0.53996E+05 | 0.44600E+05 |
| 11 | 0.2000001 | 0.53112E+05 | 0.44200E+05 |
| 12 | 0.2200001 | 0.52234E+05 | 0.43900E+05 |
| 13 | 0.2400001 | 0.51364E+05 | 0.43500E+05 |
| 14 | 0.2600001 | 0.50502E+05 | 0.43100E+05 |
| 15 | 0.2800001 | 0.49646E+05 | 0.42800E+05 |
| 16 | 0.3000001 | 0.48798E+05 | 0.42400E+05 |
| 17 | 0.3200001 | 0.47956E+05 | 0.42100E+05 |
| 18 | 0.3400001 | 0.47122E+05 | 0.41700E+05 |
| 19 | 0.3600001 | 0.46296E+05 | 0.41300E+05 |
| 20 | 0.3800001 | 0.45476E+05 | 0.41000E+05 |
| 21 | 0.4000001 | 0.44664E+05 | 0.40600E+05 |
| 22 | 0.4200001 | 0.43860E+05 | 0.40200E+05 |
| 23 | 0.4400001 | 0.43062E+05 | 0.39900E+05 |
| 24 | 0.4600001 | 0.42272E+05 | 0.39500E+05 |
| 25 | 0.4800001 | 0.41490E+05 | 0.39100E+05 |
| 26 | 0.5000001 | 0.40714E+05 | 0.38800E+05 |
| 27 | 0.5200001 | 0.39946E+05 | 0.38400E+05 |
| 28 | 0.5400001 | 0.39186E+05 | 0.38000E+05 |
| 29 | 0.5600001 | 0.38432E+05 | 0.37700E+05 |
| 30 | 0.5800001 | 0.37686E+05 | 0.37300E+05 |
| 31 | 0.6000001 | 0.36948E+05 | 0.36900E+05 |
| 32 | 0.6200001 | 0.36216E+05 | 0.36600E+05 |
| 33 | 0.6400001 | 0.35492E+05 | 0.36200E+05 |
| 34 | 0.6600001 | 0.34776E+05 | 0.35800E+05 |
| 35 | 0.6800001 | 0.34066E+05 | 0.35500E+05 |
| 36 | 0.7000001 | 0.33364E+05 | 0.35100E+05 |
| 37 | 0.7200001 | 0.32670E+05 | 0.34700E+05 |
| 38 | 0.7400001 | 0.31982E+05 | 0.34400E+05 |
| 39 | 0.7600001 | 0.31302E+05 | 0.34000E+05 |
| 40 | 0.7800001 | 0.30630E+05 | 0.33600E+05 |
| 41 | 0.8000001 | 0.29964E+05 | 0.33300E+05 |
| 42 | 0.8200001 | 0.29306E+05 | 0.32900E+05 |
| 43 | 0.8400001 | 0.28656E+05 | 0.32500E+05 |
| 44 | 0.8600001 | 0.28012E+05 | 0.32200E+05 |
| 45 | 0.8800001 | 0.27376E+05 | 0.31800E+05 |
| 46 | 0.9000001 | 0.26748E+05 | 0.31400E+05 |
| 47 | 0.9200001 | 0.26126E+05 | 0.31100E+05 |
| 48 | 0.9400001 | 0.25512E+05 | 0.30700E+05 |
| 49 | 0.9600001 | 0.24906E+05 | 0.30300E+05 |
| 50 | 0.9800001 | 0.24306E+05 | 0.30000E+05 |
| 51 | 1.0000001 | 0.23714E+05 | 0.29600E+05 |
| 52 | 1.0200001 | 0.23130E+05 | 0.29200E+05 |
| 53 | 1.0400001 | 0.22552E+05 | 0.28900E+05 |
| 54 | 1.0600001 | 0.21982E+05 | 0.28500E+05 |
| 55 | 1.0800001 | 0.21420E+05 | 0.28100E+05 |
| 56 | 1.1000001 | 0.20864E+05 | 0.27800E+05 |
| 57 | 1.1200001 | 0.20316E+05 | 0.27400E+05 |
| 58 | 1.1400001 | 0.19776E+05 | 0.27000E+05 |
| 59 | 1.1600001 | 0.19242E+05 | 0.26700E+05 |
| 60 | 1.1800001 | 0.18716E+05 | 0.26300E+05 |
| 61 | 1.2000001 | 0.18196E+05 | 0.26000E+05 |

|     |           |             |             |
|-----|-----------|-------------|-------------|
| 62  | 1.2200001 | 0.17684E+05 | 0.25600E+05 |
| 63  | 1.2400001 | 0.17180E+05 | 0.25200E+05 |
| 64  | 1.2600001 | 0.16682E+05 | 0.24900E+05 |
| 65  | 1.2800001 | 0.16192E+05 | 0.24500E+05 |
| 66  | 1.3000001 | 0.15710E+05 | 0.24100E+05 |
| 67  | 1.3200001 | 0.15234E+05 | 0.23800E+05 |
| 68  | 1.3400001 | 0.14766E+05 | 0.23400E+05 |
| 69  | 1.3600001 | 0.14306E+05 | 0.23000E+05 |
| 70  | 1.3800001 | 0.13852E+05 | 0.22700E+05 |
| 71  | 1.4000001 | 0.13406E+05 | 0.22300E+05 |
| 72  | 1.4200001 | 0.12968E+05 | 0.21900E+05 |
| 73  | 1.4400001 | 0.12536E+05 | 0.21600E+05 |
| 74  | 1.4600001 | 0.12112E+05 | 0.21200E+05 |
| 75  | 1.4800001 | 0.11696E+05 | 0.20800E+05 |
| 76  | 1.5000001 | 0.11286E+05 | 0.20500E+05 |
| 77  | 1.5200001 | 0.10884E+05 | 0.20100E+05 |
| 78  | 1.5400001 | 0.10490E+05 | 0.19700E+05 |
| 79  | 1.5600001 | 0.10102E+05 | 0.19400E+05 |
| 80  | 1.5800001 | 0.97216E+04 | 0.19000E+05 |
| 81  | 1.6000001 | 0.93496E+04 | 0.18600E+05 |
| 82  | 1.6200001 | 0.89836E+04 | 0.18300E+05 |
| 83  | 1.6400001 | 0.86256E+04 | 0.17900E+05 |
| 84  | 1.6600001 | 0.82756E+04 | 0.17500E+05 |
| 85  | 1.6800001 | 0.79316E+04 | 0.17200E+05 |
| 86  | 1.7000001 | 0.75956E+04 | 0.16800E+05 |
| 87  | 1.7200001 | 0.72676E+04 | 0.16400E+05 |
| 88  | 1.7400001 | 0.69456E+04 | 0.16100E+05 |
| 89  | 1.7600001 | 0.66316E+04 | 0.15700E+05 |
| 90  | 1.7800001 | 0.63256E+04 | 0.15300E+05 |
| 91  | 1.8000001 | 0.60256E+04 | 0.15000E+05 |
| 92  | 1.8200001 | 0.57336E+04 | 0.14600E+05 |
| 93  | 1.8400001 | 0.54496E+04 | 0.14200E+05 |
| 94  | 1.8600001 | 0.51716E+04 | 0.13900E+05 |
| 95  | 1.8800001 | 0.49016E+04 | 0.13500E+05 |
| 96  | 1.9000001 | 0.46396E+04 | 0.13100E+05 |
| 97  | 1.9200001 | 0.43836E+04 | 0.12800E+05 |
| 98  | 1.9400001 | 0.41356E+04 | 0.12400E+05 |
| 99  | 1.9600001 | 0.38956E+04 | 0.12000E+05 |
| 100 | 1.9800001 | 0.36616E+04 | 0.11700E+05 |
| 101 | 2.0000001 | 0.34356E+04 | 0.11300E+05 |
| 102 | 2.0200001 | 0.32176E+04 | 0.10900E+05 |
| 103 | 2.0400001 | 0.30056E+04 | 0.10600E+05 |
| 104 | 2.0600001 | 0.28016E+04 | 0.10200E+05 |
| 105 | 2.0800001 | 0.26046E+04 | 0.98500E+04 |
| 106 | 2.1000001 | 0.24148E+04 | 0.94900E+04 |
| 107 | 2.1200001 | 0.22324E+04 | 0.91200E+04 |
| 108 | 2.1400001 | 0.20574E+04 | 0.87500E+04 |
| 109 | 2.1600001 | 0.18896E+04 | 0.83900E+04 |
| 110 | 2.1800001 | 0.17292E+04 | 0.80200E+04 |
| 111 | 2.2000001 | 0.15760E+04 | 0.76600E+04 |
| 112 | 2.2200001 | 0.14302E+04 | 0.72900E+04 |
| 113 | 2.2400001 | 0.12918E+04 | 0.69200E+04 |
| 114 | 2.2600001 | 0.11606E+04 | 0.65600E+04 |
| 115 | 2.2800001 | 0.10368E+04 | 0.61900E+04 |
| 116 | 2.3000001 | 0.92019E+03 | 0.58300E+04 |
| 117 | 2.3200001 | 0.81099E+03 | 0.54600E+04 |
| 118 | 2.3400001 | 0.70899E+03 | 0.51000E+04 |
| 119 | 2.3600001 | 0.61439E+03 | 0.47300E+04 |
| 120 | 2.3800001 | 0.52719E+03 | 0.43600E+04 |
| 121 | 2.4000001 | 0.44719E+03 | 0.40000E+04 |
| 122 | 2.4200001 | 0.37459E+03 | 0.36300E+04 |
| 123 | 2.4400001 | 0.30919E+03 | 0.32700E+04 |
| 124 | 2.4600001 | 0.25119E+03 | 0.29000E+04 |
| 125 | 2.4800001 | 0.20059E+03 | 0.25300E+04 |
| 126 | 2.5000001 | 0.15719E+03 | 0.21700E+04 |
| 127 | 2.5200001 | 0.12119E+03 | 0.18000E+04 |

|     |           |              |             |
|-----|-----------|--------------|-------------|
| 128 | 2.5400001 | 0.92388E+02  | 0.14400E+04 |
| 129 | 2.5600001 | 0.70988E+02  | 0.10700E+04 |
| 130 | 2.5800001 | 0.54908E+02  | 0.80400E+03 |
| 131 | 2.6000001 | 0.42748E+02  | 0.60800E+03 |
| 132 | 2.6200001 | 0.33488E+02  | 0.46300E+03 |
| 133 | 2.6400001 | 0.26388E+02  | 0.35500E+03 |
| 134 | 2.6600001 | 0.20908E+02  | 0.27400E+03 |
| 135 | 2.6800001 | 0.16648E+02  | 0.21300E+03 |
| 136 | 2.7000001 | 0.13328E+02  | 0.16600E+03 |
| 137 | 2.7200001 | 0.10728E+02  | 0.13000E+03 |
| 138 | 2.7400001 | 0.86679E+01  | 0.10300E+03 |
| 139 | 2.7600001 | 0.70379E+01  | 0.81500E+02 |
| 140 | 2.7800001 | 0.57379E+01  | 0.65000E+02 |
| 141 | 2.8000001 | 0.46959E+01  | 0.52100E+02 |
| 142 | 2.8200001 | 0.38579E+01  | 0.41900E+02 |
| 143 | 2.8400001 | 0.31819E+01  | 0.33800E+02 |
| 144 | 2.8600001 | 0.26339E+01  | 0.27400E+02 |
| 145 | 2.8800001 | 0.21859E+01  | 0.22400E+02 |
| 146 | 2.9000001 | 0.18199E+01  | 0.18300E+02 |
| 147 | 2.9200001 | 0.15199E+01  | 0.15000E+02 |
| 148 | 2.9400001 | 0.12719E+01  | 0.12400E+02 |
| 149 | 2.9600001 | 0.10679E+01  | 0.10200E+02 |
| 150 | 2.9800001 | 0.89827E+00  | 0.84800E+01 |
| 151 | 3.0000001 | 0.75727E+00  | 0.70500E+01 |
| 152 | 3.0200001 | 0.63967E+00  | 0.58800E+01 |
| 153 | 3.0400001 | 0.54127E+00  | 0.49200E+01 |
| 154 | 3.0600001 | 0.45867E+00  | 0.41300E+01 |
| 155 | 3.0800001 | 0.38907E+00  | 0.34800E+01 |
| 156 | 3.1000001 | 0.33047E+00  | 0.29300E+01 |
| 157 | 3.1200001 | 0.28087E+00  | 0.24800E+01 |
| 158 | 3.1400001 | 0.23887E+00  | 0.21000E+01 |
| 159 | 3.1600001 | 0.20307E+00  | 0.17900E+01 |
| 160 | 3.1800001 | 0.17267E+00  | 0.15200E+01 |
| 161 | 3.2000001 | 0.14667E+00  | 0.13000E+01 |
| 162 | 3.2200001 | 0.12447E+00  | 0.11100E+01 |
| 163 | 3.2400001 | 0.10543E+00  | 0.95200E+00 |
| 164 | 3.2600001 | 0.89109E-01  | 0.81600E+00 |
| 165 | 3.2800001 | 0.75089E-01  | 0.70100E+00 |
| 166 | 3.3000001 | 0.63029E-01  | 0.60300E+00 |
| 167 | 3.3200001 | 0.52649E-01  | 0.51900E+00 |
| 168 | 3.3400001 | 0.43689E-01  | 0.44800E+00 |
| 169 | 3.3600001 | 0.35969E-01  | 0.38600E+00 |
| 170 | 3.3800001 | 0.29289E-01  | 0.33400E+00 |
| 171 | 3.4000001 | 0.23529E-01  | 0.28800E+00 |
| 172 | 3.4200001 | 0.18529E-01  | 0.25000E+00 |
| 173 | 3.4400001 | 0.14209E-01  | 0.21600E+00 |
| 174 | 3.4600001 | 0.10469E-01  | 0.18700E+00 |
| 175 | 3.4800001 | 0.72292E-02  | 0.16200E+00 |
| 176 | 3.5000001 | 0.44292E-02  | 0.14000E+00 |
| 177 | 3.5200001 | 0.20092E-02  | 0.12100E+00 |
| 178 | 3.5400001 | -0.90837E-04 | 0.10500E+00 |
| 179 | 3.5600001 | -0.18928E-02 | 0.90100E-01 |
| 180 | 3.5800001 | -0.34488E-02 | 0.77800E-01 |
| 181 | 3.6000001 | -0.48008E-02 | 0.67600E-01 |
| 182 | 3.6200001 | -0.59548E-02 | 0.57700E-01 |
| 183 | 3.6400001 | -0.69328E-02 | 0.48900E-01 |
| 184 | 3.6600001 | -0.77768E-02 | 0.42200E-01 |
| 185 | 3.6800001 | -0.84948E-02 | 0.35900E-01 |
| 186 | 3.7000001 | -0.91008E-02 | 0.30300E-01 |
| 187 | 3.7200001 | -0.96088E-02 | 0.25400E-01 |
| 188 | 3.7400001 | -0.10039E-01 | 0.21500E-01 |
| 189 | 3.7600001 | -0.10381E-01 | 0.17100E-01 |
| 190 | 3.7800001 | -0.10675E-01 | 0.14700E-01 |
| 191 | 3.8000001 | -0.10907E-01 | 0.11600E-01 |
| 192 | 3.8200001 | -0.11083E-01 | 0.88000E-02 |
| 193 | 3.8400001 | -0.11221E-01 | 0.69000E-02 |

|     |            |              |              |
|-----|------------|--------------|--------------|
| 194 | 3.86000001 | -0.11323E-01 | 0.51100E-02  |
| 195 | 3.88000001 | -0.11396E-01 | 0.36400E-02  |
| 196 | 3.90000001 | -0.11431E-01 | 0.17500E-02  |
| 197 | 3.92000001 | -0.11453E-01 | 0.11200E-02  |
| 198 | 3.94000001 | -0.11454E-01 | 0.20300E-04  |
| 199 | 3.96000001 | -0.11452E-01 | -0.61500E-04 |
| 200 | 3.98000001 | -0.11427E-01 | -0.12600E-02 |
| 201 | 4.00000001 | -0.11378E-01 | -0.24500E-02 |
| 202 | 4.02000001 | -0.11326E-01 | -0.25900E-02 |
| 203 | 4.04000001 | -0.11266E-01 | -0.30400E-02 |
| 204 | 4.06000001 | -0.11196E-01 | -0.34800E-02 |
| 205 | 4.08000001 | -0.11118E-01 | -0.39200E-02 |
| 206 | 4.10000001 | -0.11030E-01 | -0.43700E-02 |
| 207 | 4.12000001 | -0.10934E-01 | -0.48100E-02 |
| 208 | 4.14000001 | -0.10829E-01 | -0.52600E-02 |
| 209 | 4.16000001 | -0.10715E-01 | -0.56800E-02 |
| 210 | 4.18000001 | -0.10599E-01 | -0.57900E-02 |
| 211 | 4.20000001 | -0.10481E-01 | -0.59000E-02 |
| 212 | 4.22000001 | -0.10363E-01 | -0.59000E-02 |
| 213 | 4.24000001 | -0.10243E-01 | -0.60000E-02 |
| 214 | 4.26000001 | -0.10120E-01 | -0.61900E-02 |
| 215 | 4.28000001 | -0.99976E-02 | -0.61000E-02 |
| 216 | 4.30000001 | -0.98774E-02 | -0.60100E-02 |
| 217 | 4.32000001 | -0.97590E-02 | -0.59200E-02 |
| 218 | 4.34000001 | -0.96422E-02 | -0.58400E-02 |
| 219 | 4.36000001 | -0.95270E-02 | -0.57600E-02 |
| 220 | 4.38000001 | -0.94126E-02 | -0.57200E-02 |
| 221 | 4.40000001 | -0.92990E-02 | -0.56800E-02 |
| 222 | 4.42000001 | -0.91862E-02 | -0.56400E-02 |
| 223 | 4.44000001 | -0.90736E-02 | -0.56300E-02 |
| 224 | 4.46000001 | -0.89622E-02 | -0.55700E-02 |
| 225 | 4.48000001 | -0.88520E-02 | -0.55100E-02 |
| 226 | 4.50000001 | -0.87430E-02 | -0.54500E-02 |
| 227 | 4.52000001 | -0.86354E-02 | -0.53800E-02 |
| 228 | 4.54000001 | -0.85300E-02 | -0.52700E-02 |
| 229 | 4.56000001 | -0.84268E-02 | -0.51600E-02 |
| 230 | 4.58000001 | -0.83282E-02 | -0.49300E-02 |
| 231 | 4.60000001 | -0.82372E-02 | -0.45500E-02 |
| 232 | 4.62000001 | -0.81480E-02 | -0.44600E-02 |
| 233 | 4.64000001 | -0.80606E-02 | -0.43700E-02 |
| 234 | 4.66000001 | -0.79750E-02 | -0.42800E-02 |
| 235 | 4.68000001 | -0.78922E-02 | -0.41400E-02 |
| 236 | 4.70000001 | -0.78158E-02 | -0.38200E-02 |
| 237 | 4.72000001 | -0.77396E-02 | -0.38100E-02 |
| 238 | 4.74000001 | -0.76636E-02 | -0.38000E-02 |
| 239 | 4.76000001 | -0.75878E-02 | -0.37900E-02 |
| 240 | 4.78000001 | -0.75180E-02 | -0.34900E-02 |
| 241 | 4.80000001 | -0.74500E-02 | -0.34000E-02 |
| 242 | 4.82000001 | -0.73836E-02 | -0.33200E-02 |
| 243 | 4.84000001 | -0.73188E-02 | -0.32400E-02 |
| 244 | 4.86000001 | -0.72558E-02 | -0.31500E-02 |
| 245 | 4.88000001 | -0.71952E-02 | -0.30300E-02 |
| 246 | 4.90000001 | -0.71352E-02 | -0.30000E-02 |
| 247 | 4.92000001 | -0.70778E-02 | -0.28700E-02 |
| 248 | 4.94000001 | -0.70228E-02 | -0.27500E-02 |
| 249 | 4.96000001 | -0.69704E-02 | -0.26200E-02 |
| 250 | 4.98000001 | -0.69188E-02 | -0.25800E-02 |
| 251 | 5.00000001 | -0.68674E-02 | -0.25700E-02 |
| 252 | 5.02000001 | -0.68162E-02 | -0.25600E-02 |
| 253 | 5.04000001 | -0.67654E-02 | -0.25400E-02 |
| 254 | 5.06000001 | -0.67148E-02 | -0.25300E-02 |
| 255 | 5.08000001 | -0.66646E-02 | -0.25100E-02 |
| 256 | 5.10000001 | -0.66146E-02 | -0.25000E-02 |
| 257 | 5.12000001 | -0.65650E-02 | -0.24800E-02 |
| 258 | 5.14000001 | -0.65160E-02 | -0.24500E-02 |
| 259 | 5.16000001 | -0.64694E-02 | -0.23300E-02 |

|     |            |              |              |
|-----|------------|--------------|--------------|
| 260 | 5.18000001 | -0.64252E-02 | -0.22100E-02 |
| 261 | 5.20000001 | -0.63822E-02 | -0.21500E-02 |
| 262 | 5.22000001 | -0.63402E-02 | -0.21000E-02 |
| 263 | 5.24000001 | -0.63008E-02 | -0.19700E-02 |
| 264 | 5.26000001 | -0.62622E-02 | -0.19300E-02 |
| 265 | 5.28000001 | -0.62258E-02 | -0.18200E-02 |
| 266 | 5.30000001 | -0.61914E-02 | -0.17200E-02 |
| 267 | 5.32000001 | -0.61600E-02 | -0.15700E-02 |
| 268 | 5.34000001 | -0.61290E-02 | -0.15500E-02 |
| 269 | 5.36000001 | -0.60986E-02 | -0.15200E-02 |
| 270 | 5.38000001 | -0.60704E-02 | -0.14100E-02 |
| 271 | 5.40000001 | -0.60442E-02 | -0.13100E-02 |
| 272 | 5.42000001 | -0.60180E-02 | -0.13100E-02 |
| 273 | 5.44000001 | -0.59918E-02 | -0.13100E-02 |
| 274 | 5.46000001 | -0.59656E-02 | -0.13100E-02 |
| 275 | 5.48000001 | -0.59394E-02 | -0.13100E-02 |
| 276 | 5.50000001 | -0.59132E-02 | -0.13100E-02 |
| 277 | 5.52000001 | -0.58870E-02 | -0.13100E-02 |
| 278 | 5.54000001 | -0.58616E-02 | -0.12700E-02 |
| 279 | 5.56000001 | -0.58368E-02 | -0.12400E-02 |
| 280 | 5.58000001 | -0.58136E-02 | -0.11600E-02 |
| 281 | 5.60000001 | -0.57908E-02 | -0.11400E-02 |
| 282 | 5.62000001 | -0.57684E-02 | -0.11200E-02 |
| 283 | 5.64000001 | -0.57462E-02 | -0.11100E-02 |
| 284 | 5.66000001 | -0.57244E-02 | -0.10900E-02 |
| 285 | 5.68000001 | -0.57030E-02 | -0.10700E-02 |
| 286 | 5.70000001 | -0.56818E-02 | -0.10600E-02 |
| 287 | 5.72000001 | -0.56608E-02 | -0.10500E-02 |
| 288 | 5.74000001 | -0.56402E-02 | -0.10300E-02 |
| 289 | 5.76000001 | -0.56198E-02 | -0.10200E-02 |
| 290 | 5.78000001 | -0.55996E-02 | -0.10100E-02 |
| 291 | 5.80000001 | -0.55796E-02 | -0.10000E-02 |
| 292 | 5.82000001 | -0.55597E-02 | -0.99500E-03 |
| 293 | 5.84000001 | -0.55400E-02 | -0.98400E-03 |
| 294 | 5.86000001 | -0.55223E-02 | -0.88700E-03 |
| 295 | 5.88000001 | -0.55068E-02 | -0.77300E-03 |
| 296 | 5.90000001 | -0.54915E-02 | -0.76500E-03 |
| 297 | 5.92000001 | -0.54764E-02 | -0.75700E-03 |
| 298 | 5.94000001 | -0.54614E-02 | -0.74900E-03 |
| 299 | 5.96000001 | -0.54466E-02 | -0.74000E-03 |
| 300 | 5.98000001 | -0.54320E-02 | -0.73200E-03 |
| 301 | 6.00000001 | -0.54175E-02 | -0.72400E-03 |
| 302 | 6.02000001 | -0.54032E-02 | -0.71600E-03 |
| 303 | 6.04000001 | -0.53890E-02 | -0.70800E-03 |
| 304 | 6.06000001 | -0.53750E-02 | -0.69900E-03 |
| 305 | 6.08000001 | -0.53612E-02 | -0.69100E-03 |
| 306 | 6.10000001 | -0.53476E-02 | -0.68300E-03 |
| 307 | 6.12000001 | -0.53341E-02 | -0.67500E-03 |
| 308 | 6.14000001 | -0.53208E-02 | -0.66500E-03 |
| 309 | 6.16000001 | -0.53077E-02 | -0.65500E-03 |
| 310 | 6.18000001 | -0.52948E-02 | -0.64500E-03 |
| 311 | 6.20000001 | -0.52820E-02 | -0.63600E-03 |
| 312 | 6.22000001 | -0.52695E-02 | -0.62600E-03 |
| 313 | 6.24000001 | -0.52572E-02 | -0.61600E-03 |
| 314 | 6.26000001 | -0.52449E-02 | -0.61300E-03 |
| 315 | 6.28000001 | -0.52327E-02 | -0.61300E-03 |
| 316 | 6.30000001 | -0.52204E-02 | -0.61300E-03 |
| 317 | 6.32000001 | -0.52082E-02 | -0.61300E-03 |
| 318 | 6.34000001 | -0.51959E-02 | -0.61300E-03 |
| 319 | 6.36000001 | -0.51836E-02 | -0.61300E-03 |
| 320 | 6.38000001 | -0.51713E-02 | -0.61500E-03 |
| 321 | 6.40000001 | -0.51590E-02 | -0.61800E-03 |
| 322 | 6.42000001 | -0.51466E-02 | -0.62000E-03 |
| 323 | 6.44000001 | -0.51341E-02 | -0.62300E-03 |
| 324 | 6.46000001 | -0.51216E-02 | -0.62500E-03 |
| 325 | 6.48000001 | -0.51091E-02 | -0.62800E-03 |

|     |           |              |              |
|-----|-----------|--------------|--------------|
| 326 | 6.5000001 | -0.50964E-02 | -0.63100E-03 |
| 327 | 6.5200001 | -0.50838E-02 | -0.63300E-03 |
| 328 | 6.5400001 | -0.50711E-02 | -0.63600E-03 |
| 329 | 6.5600001 | -0.50583E-02 | -0.63800E-03 |
| 330 | 6.5800001 | -0.50455E-02 | -0.64100E-03 |
| 331 | 6.6000001 | -0.50326E-02 | -0.64300E-03 |
| 332 | 6.6200001 | -0.50197E-02 | -0.64600E-03 |
| 333 | 6.6400001 | -0.50067E-02 | -0.64800E-03 |
| 334 | 6.6600001 | -0.49937E-02 | -0.65100E-03 |
| 335 | 6.6800001 | -0.49807E-02 | -0.65300E-03 |
| 336 | 6.7000001 | -0.49675E-02 | -0.65600E-03 |
| 337 | 6.7200001 | -0.49544E-02 | -0.65800E-03 |
| 338 | 6.7400001 | -0.49412E-02 | -0.66100E-03 |
| 339 | 6.7600001 | -0.49279E-02 | -0.66300E-03 |
| 340 | 6.7800001 | -0.49146E-02 | -0.66600E-03 |
| 341 | 6.8000001 | -0.49012E-02 | -0.66800E-03 |
| 342 | 6.8200001 | -0.48878E-02 | -0.67100E-03 |
| 343 | 6.8400001 | -0.48743E-02 | -0.67400E-03 |
| 344 | 6.8600001 | -0.48608E-02 | -0.67600E-03 |
| 345 | 6.8800001 | -0.48472E-02 | -0.67900E-03 |
| 346 | 6.9000001 | -0.48336E-02 | -0.68100E-03 |
| 347 | 6.9200001 | -0.48199E-02 | -0.68400E-03 |
| 348 | 6.9400001 | -0.48062E-02 | -0.68600E-03 |
| 349 | 6.9600001 | -0.47924E-02 | -0.68900E-03 |
| 350 | 6.9800001 | -0.47786E-02 | -0.69100E-03 |
| 351 | 7.0000001 | -0.47647E-02 | -0.69400E-03 |
| 352 | 7.0200001 | -0.47508E-02 | -0.69600E-03 |
| 353 | 7.0400001 | -0.47368E-02 | -0.69900E-03 |
| 354 | 7.0600001 | -0.47228E-02 | -0.70100E-03 |
| 355 | 7.0800001 | -0.47087E-02 | -0.70400E-03 |
| 356 | 7.1000001 | -0.46946E-02 | -0.70600E-03 |
| 357 | 7.1200001 | -0.46804E-02 | -0.70900E-03 |
| 358 | 7.1400001 | -0.46662E-02 | -0.71100E-03 |
| 359 | 7.1600001 | -0.46519E-02 | -0.71400E-03 |
| 360 | 7.1800001 | -0.46376E-02 | -0.71700E-03 |
| 361 | 7.2000001 | -0.46232E-02 | -0.71900E-03 |
| 362 | 7.2200001 | -0.46088E-02 | -0.72200E-03 |
| 363 | 7.2400001 | -0.45943E-02 | -0.72400E-03 |
| 364 | 7.2600001 | -0.45797E-02 | -0.72700E-03 |
| 365 | 7.2800001 | -0.45652E-02 | -0.72900E-03 |
| 366 | 7.3000001 | -0.45505E-02 | -0.73200E-03 |
| 367 | 7.3200001 | -0.45358E-02 | -0.73400E-03 |
| 368 | 7.3400001 | -0.45211E-02 | -0.73700E-03 |
| 369 | 7.3600001 | -0.45063E-02 | -0.73900E-03 |
| 370 | 7.3800001 | -0.44915E-02 | -0.74200E-03 |
| 371 | 7.4000001 | -0.44766E-02 | -0.74400E-03 |
| 372 | 7.4200001 | -0.44617E-02 | -0.74700E-03 |
| 373 | 7.4400001 | -0.44467E-02 | -0.74900E-03 |
| 374 | 7.4600001 | -0.44316E-02 | -0.75200E-03 |
| 375 | 7.4800001 | -0.44166E-02 | -0.75400E-03 |
| 376 | 7.5000001 | -0.44014E-02 | -0.75700E-03 |
| 377 | 7.5200001 | -0.43862E-02 | -0.76000E-03 |
| 378 | 7.5400001 | -0.43710E-02 | -0.76200E-03 |
| 379 | 7.5600001 | -0.43557E-02 | -0.76500E-03 |
| 380 | 7.5800001 | -0.43403E-02 | -0.76700E-03 |
| 381 | 7.6000001 | -0.43249E-02 | -0.77000E-03 |
| 382 | 7.6200001 | -0.43095E-02 | -0.77200E-03 |
| 383 | 7.6400001 | -0.42940E-02 | -0.77500E-03 |
| 384 | 7.6600001 | -0.42785E-02 | -0.77700E-03 |
| 385 | 7.6800001 | -0.42629E-02 | -0.78000E-03 |
| 386 | 7.7000001 | -0.42472E-02 | -0.78200E-03 |
| 387 | 7.7200001 | -0.42315E-02 | -0.78500E-03 |
| 388 | 7.7400001 | -0.42158E-02 | -0.78700E-03 |
| 389 | 7.7600001 | -0.42000E-02 | -0.79000E-03 |
| 390 | 7.7800001 | -0.41841E-02 | -0.79200E-03 |
| 391 | 7.8000001 | -0.41682E-02 | -0.79500E-03 |

|     |           |              |              |
|-----|-----------|--------------|--------------|
| 392 | 7.8200001 | -0.41523E-02 | -0.79700E-03 |
| 393 | 7.8400001 | -0.41363E-02 | -0.80000E-03 |
| 394 | 7.8600001 | -0.41202E-02 | -0.80300E-03 |
| 395 | 7.8800001 | -0.41041E-02 | -0.80500E-03 |
| 396 | 7.9000001 | -0.40880E-02 | -0.80800E-03 |
| 397 | 7.9200001 | -0.40718E-02 | -0.81000E-03 |
| 398 | 7.9400001 | -0.40555E-02 | -0.81300E-03 |
| 399 | 7.9600001 | -0.40392E-02 | -0.81500E-03 |
| 400 | 7.9800001 | -0.40229E-02 | -0.81800E-03 |
| 401 | 8.0000001 | -0.40065E-02 | -0.82000E-03 |
| 402 | 8.0200001 | -0.39900E-02 | -0.82300E-03 |
| 403 | 8.0400001 | -0.39735E-02 | -0.82500E-03 |
| 404 | 8.0600001 | -0.39569E-02 | -0.82800E-03 |
| 405 | 8.0800001 | -0.39403E-02 | -0.83000E-03 |
| 406 | 8.1000001 | -0.39237E-02 | -0.83300E-03 |
| 407 | 8.1200001 | -0.39070E-02 | -0.83500E-03 |
| 408 | 8.1400001 | -0.38902E-02 | -0.83800E-03 |
| 409 | 8.1600001 | -0.38734E-02 | -0.84000E-03 |
| 410 | 8.1800001 | -0.38566E-02 | -0.84300E-03 |
| 411 | 8.2000001 | -0.38396E-02 | -0.84600E-03 |
| 412 | 8.2200001 | -0.38227E-02 | -0.84800E-03 |
| 413 | 8.2400001 | -0.38057E-02 | -0.85100E-03 |
| 414 | 8.2600001 | -0.37886E-02 | -0.85300E-03 |
| 415 | 8.2800001 | -0.37715E-02 | -0.85600E-03 |
| 416 | 8.3000001 | -0.37543E-02 | -0.85800E-03 |
| 417 | 8.3200001 | -0.37371E-02 | -0.86100E-03 |
| 418 | 8.3400001 | -0.37198E-02 | -0.86300E-03 |
| 419 | 8.3600001 | -0.37025E-02 | -0.86600E-03 |
| 420 | 8.3800001 | -0.36852E-02 | -0.86800E-03 |
| 421 | 8.4000001 | -0.36677E-02 | -0.87100E-03 |
| 422 | 8.4200001 | -0.36503E-02 | -0.87300E-03 |
| 423 | 8.4400001 | -0.36328E-02 | -0.87600E-03 |
| 424 | 8.4600001 | -0.36152E-02 | -0.87800E-03 |
| 425 | 8.4800001 | -0.35976E-02 | -0.88100E-03 |
| 426 | 8.5000001 | -0.35799E-02 | -0.88300E-03 |
| 427 | 8.5200001 | -0.35622E-02 | -0.88600E-03 |
| 428 | 8.5400001 | -0.35444E-02 | -0.88900E-03 |
| 429 | 8.5600001 | -0.35266E-02 | -0.89100E-03 |
| 430 | 8.5800001 | -0.35087E-02 | -0.89400E-03 |
| 431 | 8.6000001 | -0.34908E-02 | -0.89600E-03 |
| 432 | 8.6200001 | -0.34728E-02 | -0.89900E-03 |
| 433 | 8.6400001 | -0.34548E-02 | -0.90100E-03 |
| 434 | 8.6600001 | -0.34367E-02 | -0.90400E-03 |
| 435 | 8.6800001 | -0.34186E-02 | -0.90600E-03 |
| 436 | 8.7000001 | -0.34004E-02 | -0.90900E-03 |
| 437 | 8.7200001 | -0.33822E-02 | -0.91100E-03 |
| 438 | 8.7400001 | -0.33639E-02 | -0.91400E-03 |
| 439 | 8.7600001 | -0.33456E-02 | -0.91600E-03 |
| 440 | 8.7800001 | -0.33272E-02 | -0.91900E-03 |
| 441 | 8.8000001 | -0.33088E-02 | -0.92100E-03 |
| 442 | 8.8200001 | -0.32903E-02 | -0.92400E-03 |
| 443 | 8.8400001 | -0.32718E-02 | -0.92600E-03 |
| 444 | 8.8600001 | -0.32532E-02 | -0.92900E-03 |
| 445 | 8.8800001 | -0.32346E-02 | -0.93200E-03 |
| 446 | 8.9000001 | -0.32159E-02 | -0.93400E-03 |
| 447 | 8.9200001 | -0.31972E-02 | -0.93700E-03 |
| 448 | 8.9400001 | -0.31784E-02 | -0.93900E-03 |
| 449 | 8.9600001 | -0.31595E-02 | -0.94200E-03 |
| 450 | 8.9800001 | -0.31407E-02 | -0.94400E-03 |
| 451 | 9.0000001 | -0.31217E-02 | -0.94700E-03 |
| 452 | 9.0200001 | -0.31027E-02 | -0.94900E-03 |
| 453 | 9.0400001 | -0.30837E-02 | -0.95200E-03 |
| 454 | 9.0600001 | -0.30646E-02 | -0.95400E-03 |
| 455 | 9.0800001 | -0.30455E-02 | -0.95700E-03 |
| 456 | 9.1000001 | -0.30263E-02 | -0.95900E-03 |
| 457 | 9.1200001 | -0.30071E-02 | -0.96200E-03 |

| 12/13/16 | lammps.N1_E1.table |              |              | 8 |
|----------|--------------------|--------------|--------------|---|
| 458      | 9.14000001         | -0.29878E-02 | -0.96400E-03 |   |
| 459      | 9.16000001         | -0.29684E-02 | -0.96700E-03 |   |
| 460      | 9.18000001         | -0.29491E-02 | -0.96900E-03 |   |
| 461      | 9.20000001         | -0.29296E-02 | -0.97200E-03 |   |
| 462      | 9.22000001         | -0.29101E-02 | -0.97500E-03 |   |
| 463      | 9.24000001         | -0.28906E-02 | -0.97700E-03 |   |
| 464      | 9.26000001         | -0.28710E-02 | -0.98000E-03 |   |
| 465      | 9.28000001         | -0.28513E-02 | -0.98200E-03 |   |
| 466      | 9.30000001         | -0.28316E-02 | -0.98500E-03 |   |
| 467      | 9.32000001         | -0.28119E-02 | -0.98700E-03 |   |
| 468      | 9.34000001         | -0.27921E-02 | -0.99000E-03 |   |
| 469      | 9.36000001         | -0.27723E-02 | -0.99200E-03 |   |
| 470      | 9.38000001         | -0.27524E-02 | -0.99500E-03 |   |
| 471      | 9.40000001         | -0.27324E-02 | -0.99700E-03 |   |
| 472      | 9.42000001         | -0.27124E-02 | -0.10000E-02 |   |
| 473      | 9.44000001         | -0.26924E-02 | -0.10000E-02 |   |
| 474      | 9.46000001         | -0.26724E-02 | -0.10000E-02 |   |
| 475      | 9.48000001         | -0.26522E-02 | -0.10100E-02 |   |
| 476      | 9.50000001         | -0.26320E-02 | -0.10100E-02 |   |
| 477      | 9.52000001         | -0.26118E-02 | -0.10100E-02 |   |
| 478      | 9.54000001         | -0.25914E-02 | -0.10200E-02 |   |
| 479      | 9.56000001         | -0.25710E-02 | -0.10200E-02 |   |
| 480      | 9.58000001         | -0.25506E-02 | -0.10200E-02 |   |
| 481      | 9.60000001         | -0.25302E-02 | -0.10200E-02 |   |
| 482      | 9.62000001         | -0.25096E-02 | -0.10300E-02 |   |
| 483      | 9.64000001         | -0.24890E-02 | -0.10300E-02 |   |
| 484      | 9.66000001         | -0.24684E-02 | -0.10300E-02 |   |
| 485      | 9.68000001         | -0.24478E-02 | -0.10300E-02 |   |
| 486      | 9.70000001         | -0.24270E-02 | -0.10400E-02 |   |
| 487      | 9.72000001         | -0.24062E-02 | -0.10400E-02 |   |
| 488      | 9.74000001         | -0.23854E-02 | -0.10400E-02 |   |
| 489      | 9.76000001         | -0.23646E-02 | -0.10400E-02 |   |
| 490      | 9.78000001         | -0.23436E-02 | -0.10500E-02 |   |
| 491      | 9.80000001         | -0.23226E-02 | -0.10500E-02 |   |
| 492      | 9.82000001         | -0.23016E-02 | -0.10500E-02 |   |
| 493      | 9.84000001         | -0.22806E-02 | -0.10500E-02 |   |
| 494      | 9.86000001         | -0.22594E-02 | -0.10600E-02 |   |
| 495      | 9.88000001         | -0.22382E-02 | -0.10600E-02 |   |
| 496      | 9.90000001         | -0.22170E-02 | -0.10600E-02 |   |
| 497      | 9.92000001         | -0.21958E-02 | -0.10600E-02 |   |
| 498      | 9.94000001         | -0.21744E-02 | -0.10700E-02 |   |
| 499      | 9.96000001         | -0.21530E-02 | -0.10700E-02 |   |
| 500      | 9.98000001         | -0.21316E-02 | -0.10700E-02 |   |
| 501      | 10.00000001        | -0.21102E-02 | -0.10700E-02 |   |
| 502      | 10.02000001        | -0.20886E-02 | -0.10800E-02 |   |
| 503      | 10.04000001        | -0.20670E-02 | -0.10800E-02 |   |
| 504      | 10.06000001        | -0.20454E-02 | -0.10800E-02 |   |
| 505      | 10.08000001        | -0.20238E-02 | -0.10800E-02 |   |
| 506      | 10.10000001        | -0.20020E-02 | -0.10900E-02 |   |
| 507      | 10.12000001        | -0.19802E-02 | -0.10900E-02 |   |
| 508      | 10.14000001        | -0.19584E-02 | -0.10900E-02 |   |
| 509      | 10.16000001        | -0.19366E-02 | -0.10900E-02 |   |
| 510      | 10.18000001        | -0.19146E-02 | -0.11000E-02 |   |
| 511      | 10.20000001        | -0.18926E-02 | -0.11000E-02 |   |
| 512      | 10.22000001        | -0.18706E-02 | -0.11000E-02 |   |
| 513      | 10.24000001        | -0.18486E-02 | -0.11000E-02 |   |
| 514      | 10.26000001        | -0.18264E-02 | -0.11100E-02 |   |
| 515      | 10.28000001        | -0.18042E-02 | -0.11100E-02 |   |
| 516      | 10.30000001        | -0.17820E-02 | -0.11100E-02 |   |
| 517      | 10.32000001        | -0.17598E-02 | -0.11100E-02 |   |
| 518      | 10.34000001        | -0.17374E-02 | -0.11200E-02 |   |
| 519      | 10.36000001        | -0.17150E-02 | -0.11200E-02 |   |
| 520      | 10.38000001        | -0.16926E-02 | -0.11200E-02 |   |
| 521      | 10.40000001        | -0.16702E-02 | -0.11200E-02 |   |
| 522      | 10.42000001        | -0.16476E-02 | -0.11300E-02 |   |
| 523      | 10.44000001        | -0.16250E-02 | -0.11300E-02 |   |



|     |            |              |              |
|-----|------------|--------------|--------------|
| 524 | 10.4600001 | -0.16024E-02 | -0.11300E-02 |
| 525 | 10.4800001 | -0.15798E-02 | -0.11300E-02 |
| 526 | 10.5000001 | -0.15570E-02 | -0.11400E-02 |
| 527 | 10.5200001 | -0.15342E-02 | -0.11400E-02 |
| 528 | 10.5400001 | -0.15114E-02 | -0.11400E-02 |
| 529 | 10.5600001 | -0.14886E-02 | -0.11400E-02 |
| 530 | 10.5800001 | -0.14656E-02 | -0.11500E-02 |
| 531 | 10.6000001 | -0.14426E-02 | -0.11500E-02 |
| 532 | 10.6200001 | -0.14196E-02 | -0.11500E-02 |
| 533 | 10.6400001 | -0.13966E-02 | -0.11500E-02 |
| 534 | 10.6600001 | -0.13734E-02 | -0.11600E-02 |
| 535 | 10.6800001 | -0.13502E-02 | -0.11600E-02 |
| 536 | 10.7000001 | -0.13270E-02 | -0.11600E-02 |
| 537 | 10.7200001 | -0.13038E-02 | -0.11600E-02 |
| 538 | 10.7400001 | -0.12804E-02 | -0.11700E-02 |
| 539 | 10.7600001 | -0.12570E-02 | -0.11700E-02 |
| 540 | 10.7800001 | -0.12336E-02 | -0.11700E-02 |
| 541 | 10.8000001 | -0.12102E-02 | -0.11700E-02 |
| 542 | 10.8200001 | -0.11866E-02 | -0.11800E-02 |
| 543 | 10.8400001 | -0.11630E-02 | -0.11800E-02 |
| 544 | 10.8600001 | -0.11394E-02 | -0.11800E-02 |
| 545 | 10.8800001 | -0.11158E-02 | -0.11800E-02 |
| 546 | 10.9000001 | -0.10920E-02 | -0.11900E-02 |
| 547 | 10.9200001 | -0.10682E-02 | -0.11900E-02 |
| 548 | 10.9400001 | -0.10444E-02 | -0.11900E-02 |
| 549 | 10.9600001 | -0.10206E-02 | -0.11900E-02 |
| 550 | 10.9800001 | -0.99661E-03 | -0.12000E-02 |
| 551 | 11.0000001 | -0.97261E-03 | -0.12000E-02 |
| 552 | 11.0200001 | -0.94861E-03 | -0.12000E-02 |
| 553 | 11.0400001 | -0.92461E-03 | -0.12000E-02 |
| 554 | 11.0600001 | -0.90041E-03 | -0.12100E-02 |
| 555 | 11.0800001 | -0.87621E-03 | -0.12100E-02 |
| 556 | 11.1000001 | -0.85181E-03 | -0.12200E-02 |
| 557 | 11.1200001 | -0.82741E-03 | -0.12200E-02 |
| 558 | 11.1400001 | -0.80281E-03 | -0.12300E-02 |
| 559 | 11.1600001 | -0.77821E-03 | -0.12300E-02 |
| 560 | 11.1800001 | -0.75341E-03 | -0.12400E-02 |
| 561 | 11.2000001 | -0.72841E-03 | -0.12500E-02 |
| 562 | 11.2200001 | -0.70341E-03 | -0.12500E-02 |
| 563 | 11.2400001 | -0.67821E-03 | -0.12600E-02 |
| 564 | 11.2600001 | -0.65301E-03 | -0.12600E-02 |
| 565 | 11.2800001 | -0.62761E-03 | -0.12700E-02 |
| 566 | 11.3000001 | -0.60221E-03 | -0.12700E-02 |
| 567 | 11.3200001 | -0.57661E-03 | -0.12800E-02 |
| 568 | 11.3400001 | -0.55101E-03 | -0.12800E-02 |
| 569 | 11.3600001 | -0.52521E-03 | -0.12900E-02 |
| 570 | 11.3800001 | -0.49921E-03 | -0.13000E-02 |
| 571 | 11.4000001 | -0.47321E-03 | -0.13000E-02 |
| 572 | 11.4200001 | -0.44701E-03 | -0.13100E-02 |
| 573 | 11.4400001 | -0.42081E-03 | -0.13100E-02 |
| 574 | 11.4600001 | -0.39441E-03 | -0.13200E-02 |
| 575 | 11.4800001 | -0.36801E-03 | -0.13200E-02 |
| 576 | 11.5000001 | -0.34141E-03 | -0.13300E-02 |
| 577 | 11.5200001 | -0.31481E-03 | -0.13300E-02 |
| 578 | 11.5400001 | -0.28801E-03 | -0.13400E-02 |
| 579 | 11.5600001 | -0.26101E-03 | -0.13500E-02 |
| 580 | 11.5800001 | -0.23401E-03 | -0.13500E-02 |
| 581 | 11.6000001 | -0.20681E-03 | -0.13600E-02 |
| 582 | 11.6200001 | -0.17961E-03 | -0.13600E-02 |
| 583 | 11.6400001 | -0.15221E-03 | -0.13700E-02 |
| 584 | 11.6600001 | -0.12481E-03 | -0.13700E-02 |
| 585 | 11.6800001 | -0.97213E-04 | -0.13800E-02 |
| 586 | 11.7000001 | -0.69613E-04 | -0.13800E-02 |
| 587 | 11.7200001 | -0.41813E-04 | -0.13900E-02 |
| 588 | 11.7400001 | -0.13813E-04 | -0.14000E-02 |
| 589 | 11.7600001 | -0.13813E-04 | 0.00000E+00  |

|     |            |              |              |
|-----|------------|--------------|--------------|
| 590 | 11.7800001 | 0.000000E+00 | 0.000000E+00 |
| 591 | 11.8000001 | 0.000000E+00 | 0.000000E+00 |
| 592 | 11.8200001 | 0.000000E+00 | 0.000000E+00 |
| 593 | 11.8400001 | 0.000000E+00 | 0.000000E+00 |
| 594 | 11.8600001 | 0.000000E+00 | 0.000000E+00 |
| 595 | 11.8800001 | 0.000000E+00 | 0.000000E+00 |
| 596 | 11.9000001 | 0.000000E+00 | 0.000000E+00 |
| 597 | 11.9200001 | 0.000000E+00 | 0.000000E+00 |
| 598 | 11.9400001 | 0.000000E+00 | 0.000000E+00 |
| 599 | 11.9600001 | 0.000000E+00 | 0.000000E+00 |
| 600 | 11.9800001 | 0.000000E+00 | 0.000000E+00 |
