# Supplementary material
Source: MDPI journal article supplement (https://www.mdpi.com/2226-4310/5/1/1)
Supplement: s1 [file s1]

# Tabulated potential for E1-NN

E1-NN

N 600 R 0.0000001 11.9800001

|    |           |             |             |
|----|-----------|-------------|-------------|
| 1  | 0.0000001 | 0.68243E+05 | 0.47900E+05 |
| 2  | 0.0200001 | 0.67293E+05 | 0.47500E+05 |
| 3  | 0.0400001 | 0.66349E+05 | 0.47200E+05 |
| 4  | 0.0600001 | 0.65411E+05 | 0.46900E+05 |
| 5  | 0.0800001 | 0.64481E+05 | 0.46500E+05 |
| 6  | 0.1000001 | 0.63557E+05 | 0.46200E+05 |
| 7  | 0.1200001 | 0.62639E+05 | 0.45900E+05 |
| 8  | 0.1400001 | 0.61729E+05 | 0.45500E+05 |
| 9  | 0.1600001 | 0.60825E+05 | 0.45200E+05 |
| 10 | 0.1800001 | 0.59927E+05 | 0.44900E+05 |
| 11 | 0.2000001 | 0.59037E+05 | 0.44500E+05 |
| 12 | 0.2200001 | 0.58153E+05 | 0.44200E+05 |
| 13 | 0.2400001 | 0.57275E+05 | 0.43900E+05 |
| 14 | 0.2600001 | 0.56405E+05 | 0.43500E+05 |
| 15 | 0.2800001 | 0.55541E+05 | 0.43200E+05 |
| 16 | 0.3000001 | 0.54683E+05 | 0.42900E+05 |
| 17 | 0.3200001 | 0.53833E+05 | 0.42500E+05 |
| 18 | 0.3400001 | 0.52989E+05 | 0.42200E+05 |
| 19 | 0.3600001 | 0.52153E+05 | 0.41800E+05 |
| 20 | 0.3800001 | 0.51323E+05 | 0.41500E+05 |
| 21 | 0.4000001 | 0.50499E+05 | 0.41200E+05 |
| 22 | 0.4200001 | 0.49683E+05 | 0.40800E+05 |
| 23 | 0.4400001 | 0.48873E+05 | 0.40500E+05 |
| 24 | 0.4600001 | 0.48069E+05 | 0.40200E+05 |
| 25 | 0.4800001 | 0.47273E+05 | 0.39800E+05 |
| 26 | 0.5000001 | 0.46483E+05 | 0.39500E+05 |
| 27 | 0.5200001 | 0.45699E+05 | 0.39200E+05 |
| 28 | 0.5400001 | 0.44923E+05 | 0.38800E+05 |
| 29 | 0.5600001 | 0.44153E+05 | 0.38500E+05 |
| 30 | 0.5800001 | 0.43389E+05 | 0.38200E+05 |
| 31 | 0.6000001 | 0.42633E+05 | 0.37800E+05 |
| 32 | 0.6200001 | 0.41883E+05 | 0.37500E+05 |
| 33 | 0.6400001 | 0.41139E+05 | 0.37200E+05 |
| 34 | 0.6600001 | 0.40403E+05 | 0.36800E+05 |
| 35 | 0.6800001 | 0.39673E+05 | 0.36500E+05 |
| 36 | 0.7000001 | 0.38949E+05 | 0.36200E+05 |
| 37 | 0.7200001 | 0.38233E+05 | 0.35800E+05 |
| 38 | 0.7400001 | 0.37523E+05 | 0.35500E+05 |
| 39 | 0.7600001 | 0.36819E+05 | 0.35200E+05 |
| 40 | 0.7800001 | 0.36123E+05 | 0.34800E+05 |
| 41 | 0.8000001 | 0.35433E+05 | 0.34500E+05 |
| 42 | 0.8200001 | 0.34749E+05 | 0.34200E+05 |
| 43 | 0.8400001 | 0.34073E+05 | 0.33800E+05 |
| 44 | 0.8600001 | 0.33403E+05 | 0.33500E+05 |
| 45 | 0.8800001 | 0.32739E+05 | 0.33200E+05 |
| 46 | 0.9000001 | 0.32083E+05 | 0.32800E+05 |
| 47 | 0.9200001 | 0.31433E+05 | 0.32500E+05 |
| 48 | 0.9400001 | 0.30789E+05 | 0.32200E+05 |
| 49 | 0.9600001 | 0.30153E+05 | 0.31800E+05 |
| 50 | 0.9800001 | 0.29523E+05 | 0.31500E+05 |
| 51 | 1.0000001 | 0.28899E+05 | 0.31200E+05 |
| 52 | 1.0200001 | 0.28283E+05 | 0.30800E+05 |
| 53 | 1.0400001 | 0.27673E+05 | 0.30500E+05 |
| 54 | 1.0600001 | 0.27069E+05 | 0.30200E+05 |
| 55 | 1.0800001 | 0.26473E+05 | 0.29800E+05 |
| 56 | 1.1000001 | 0.25883E+05 | 0.29500E+05 |
| 57 | 1.1200001 | 0.25299E+05 | 0.29200E+05 |
| 58 | 1.1400001 | 0.24723E+05 | 0.28800E+05 |
| 59 | 1.1600001 | 0.24153E+05 | 0.28500E+05 |
| 60 | 1.1800001 | 0.23589E+05 | 0.28200E+05 |
| 61 | 1.2000001 | 0.23033E+05 | 0.27800E+05 |

|     |           |             |             |
|-----|-----------|-------------|-------------|
| 62  | 1.2200001 | 0.22483E+05 | 0.27500E+05 |
| 63  | 1.2400001 | 0.21939E+05 | 0.27200E+05 |
| 64  | 1.2600001 | 0.21403E+05 | 0.26800E+05 |
| 65  | 1.2800001 | 0.20873E+05 | 0.26500E+05 |
| 66  | 1.3000001 | 0.20349E+05 | 0.26200E+05 |
| 67  | 1.3200001 | 0.19833E+05 | 0.25800E+05 |
| 68  | 1.3400001 | 0.19323E+05 | 0.25500E+05 |
| 69  | 1.3600001 | 0.18819E+05 | 0.25200E+05 |
| 70  | 1.3800001 | 0.18323E+05 | 0.24800E+05 |
| 71  | 1.4000001 | 0.17833E+05 | 0.24500E+05 |
| 72  | 1.4200001 | 0.17349E+05 | 0.24200E+05 |
| 73  | 1.4400001 | 0.16873E+05 | 0.23800E+05 |
| 74  | 1.4600001 | 0.16403E+05 | 0.23500E+05 |
| 75  | 1.4800001 | 0.15939E+05 | 0.23200E+05 |
| 76  | 1.5000001 | 0.15483E+05 | 0.22800E+05 |
| 77  | 1.5200001 | 0.15033E+05 | 0.22500E+05 |
| 78  | 1.5400001 | 0.14589E+05 | 0.22200E+05 |
| 79  | 1.5600001 | 0.14153E+05 | 0.21800E+05 |
| 80  | 1.5800001 | 0.13723E+05 | 0.21500E+05 |
| 81  | 1.6000001 | 0.13299E+05 | 0.21200E+05 |
| 82  | 1.6200001 | 0.12883E+05 | 0.20800E+05 |
| 83  | 1.6400001 | 0.12473E+05 | 0.20500E+05 |
| 84  | 1.6600001 | 0.12069E+05 | 0.20200E+05 |
| 85  | 1.6800001 | 0.11673E+05 | 0.19800E+05 |
| 86  | 1.7000001 | 0.11283E+05 | 0.19500E+05 |
| 87  | 1.7200001 | 0.10899E+05 | 0.19200E+05 |
| 88  | 1.7400001 | 0.10523E+05 | 0.18800E+05 |
| 89  | 1.7600001 | 0.10153E+05 | 0.18500E+05 |
| 90  | 1.7800001 | 0.97891E+04 | 0.18200E+05 |
| 91  | 1.8000001 | 0.94331E+04 | 0.17800E+05 |
| 92  | 1.8200001 | 0.90831E+04 | 0.17500E+05 |
| 93  | 1.8400001 | 0.87391E+04 | 0.17200E+05 |
| 94  | 1.8600001 | 0.84031E+04 | 0.16800E+05 |
| 95  | 1.8800001 | 0.80731E+04 | 0.16500E+05 |
| 96  | 1.9000001 | 0.77491E+04 | 0.16200E+05 |
| 97  | 1.9200001 | 0.74331E+04 | 0.15800E+05 |
| 98  | 1.9400001 | 0.71231E+04 | 0.15500E+05 |
| 99  | 1.9600001 | 0.68191E+04 | 0.15200E+05 |
| 100 | 1.9800001 | 0.65231E+04 | 0.14800E+05 |
| 101 | 2.0000001 | 0.62331E+04 | 0.14500E+05 |
| 102 | 2.0200001 | 0.59491E+04 | 0.14200E+05 |
| 103 | 2.0400001 | 0.56731E+04 | 0.13800E+05 |
| 104 | 2.0600001 | 0.54031E+04 | 0.13500E+05 |
| 105 | 2.0800001 | 0.51391E+04 | 0.13200E+05 |
| 106 | 2.1000001 | 0.48831E+04 | 0.12800E+05 |
| 107 | 2.1200001 | 0.46331E+04 | 0.12500E+05 |
| 108 | 2.1400001 | 0.43891E+04 | 0.12200E+05 |
| 109 | 2.1600001 | 0.41531E+04 | 0.11800E+05 |
| 110 | 2.1800001 | 0.39231E+04 | 0.11500E+05 |
| 111 | 2.2000001 | 0.36991E+04 | 0.11200E+05 |
| 112 | 2.2200001 | 0.34831E+04 | 0.10800E+05 |
| 113 | 2.2400001 | 0.32731E+04 | 0.10500E+05 |
| 114 | 2.2600001 | 0.30691E+04 | 0.10200E+05 |
| 115 | 2.2800001 | 0.28723E+04 | 0.98400E+04 |
| 116 | 2.3000001 | 0.26821E+04 | 0.95100E+04 |
| 117 | 2.3200001 | 0.24985E+04 | 0.91800E+04 |
| 118 | 2.3400001 | 0.23217E+04 | 0.88400E+04 |
| 119 | 2.3600001 | 0.21515E+04 | 0.85100E+04 |
| 120 | 2.3800001 | 0.19879E+04 | 0.81800E+04 |
| 121 | 2.4000001 | 0.18311E+04 | 0.78400E+04 |
| 122 | 2.4200001 | 0.16809E+04 | 0.75100E+04 |
| 123 | 2.4400001 | 0.15373E+04 | 0.71800E+04 |
| 124 | 2.4600001 | 0.14005E+04 | 0.68400E+04 |
| 125 | 2.4800001 | 0.12703E+04 | 0.65100E+04 |
| 126 | 2.5000001 | 0.11467E+04 | 0.61800E+04 |
| 127 | 2.5200001 | 0.10299E+04 | 0.58400E+04 |

|     |           |              |             |
|-----|-----------|--------------|-------------|
| 128 | 2.5400001 | 0.91974E+03  | 0.55100E+04 |
| 129 | 2.5600001 | 0.81614E+03  | 0.51800E+04 |
| 130 | 2.5800001 | 0.71934E+03  | 0.48400E+04 |
| 131 | 2.6000001 | 0.62914E+03  | 0.45100E+04 |
| 132 | 2.6200001 | 0.54554E+03  | 0.41800E+04 |
| 133 | 2.6400001 | 0.46874E+03  | 0.38400E+04 |
| 134 | 2.6600001 | 0.39854E+03  | 0.35100E+04 |
| 135 | 2.6800001 | 0.33494E+03  | 0.31800E+04 |
| 136 | 2.7000001 | 0.27814E+03  | 0.28400E+04 |
| 137 | 2.7200001 | 0.22794E+03  | 0.25100E+04 |
| 138 | 2.7400001 | 0.18434E+03  | 0.21800E+04 |
| 139 | 2.7600001 | 0.14754E+03  | 0.18400E+04 |
| 140 | 2.7800001 | 0.11734E+03  | 0.15100E+04 |
| 141 | 2.8000001 | 0.93741E+02  | 0.11800E+04 |
| 142 | 2.8200001 | 0.75321E+02  | 0.92100E+03 |
| 143 | 2.8400001 | 0.60821E+02  | 0.72500E+03 |
| 144 | 2.8600001 | 0.49321E+02  | 0.57500E+03 |
| 145 | 2.8800001 | 0.40181E+02  | 0.45700E+03 |
| 146 | 2.9000001 | 0.32861E+02  | 0.36600E+03 |
| 147 | 2.9200001 | 0.26981E+02  | 0.29400E+03 |
| 148 | 2.9400001 | 0.22241E+02  | 0.23700E+03 |
| 149 | 2.9600001 | 0.18401E+02  | 0.19200E+03 |
| 150 | 2.9800001 | 0.15281E+02  | 0.15600E+03 |
| 151 | 3.0000001 | 0.12721E+02  | 0.12800E+03 |
| 152 | 3.0200001 | 0.10621E+02  | 0.10500E+03 |
| 153 | 3.0400001 | 0.88974E+01  | 0.86200E+02 |
| 154 | 3.0600001 | 0.74734E+01  | 0.71200E+02 |
| 155 | 3.0800001 | 0.62954E+01  | 0.58900E+02 |
| 156 | 3.1000001 | 0.53154E+01  | 0.49000E+02 |
| 157 | 3.1200001 | 0.44994E+01  | 0.40800E+02 |
| 158 | 3.1400001 | 0.38174E+01  | 0.34100E+02 |
| 159 | 3.1600001 | 0.32454E+01  | 0.28600E+02 |
| 160 | 3.1800001 | 0.27634E+01  | 0.24100E+02 |
| 161 | 3.2000001 | 0.23574E+01  | 0.20300E+02 |
| 162 | 3.2200001 | 0.20134E+01  | 0.17200E+02 |
| 163 | 3.2400001 | 0.17234E+01  | 0.14500E+02 |
| 164 | 3.2600001 | 0.14774E+01  | 0.12300E+02 |
| 165 | 3.2800001 | 0.12674E+01  | 0.10500E+02 |
| 166 | 3.3000001 | 0.10882E+01  | 0.89600E+01 |
| 167 | 3.3200001 | 0.93519E+00  | 0.76500E+01 |
| 168 | 3.3400001 | 0.80419E+00  | 0.65500E+01 |
| 169 | 3.3600001 | 0.69159E+00  | 0.56300E+01 |
| 170 | 3.3800001 | 0.59499E+00  | 0.48300E+01 |
| 171 | 3.4000001 | 0.51179E+00  | 0.41600E+01 |
| 172 | 3.4200001 | 0.43999E+00  | 0.35900E+01 |
| 173 | 3.4400001 | 0.37799E+00  | 0.31000E+01 |
| 174 | 3.4600001 | 0.32439E+00  | 0.26800E+01 |
| 175 | 3.4800001 | 0.27799E+00  | 0.23200E+01 |
| 176 | 3.5000001 | 0.23779E+00  | 0.20100E+01 |
| 177 | 3.5200001 | 0.20279E+00  | 0.17500E+01 |
| 178 | 3.5400001 | 0.17259E+00  | 0.15100E+01 |
| 179 | 3.5600001 | 0.14619E+00  | 0.13200E+01 |
| 180 | 3.5800001 | 0.12319E+00  | 0.11500E+01 |
| 181 | 3.6000001 | 0.10325E+00  | 0.99700E+00 |
| 182 | 3.6200001 | 0.85991E-01  | 0.86300E+00 |
| 183 | 3.6400001 | 0.70851E-01  | 0.75700E+00 |
| 184 | 3.6600001 | 0.57651E-01  | 0.66000E+00 |
| 185 | 3.6800001 | 0.46031E-01  | 0.58100E+00 |
| 186 | 3.7000001 | 0.36071E-01  | 0.49800E+00 |
| 187 | 3.7200001 | 0.27291E-01  | 0.43900E+00 |
| 188 | 3.7400001 | 0.19731E-01  | 0.37800E+00 |
| 189 | 3.7600001 | 0.13031E-01  | 0.33500E+00 |
| 190 | 3.7800001 | 0.72910E-02  | 0.28700E+00 |
| 191 | 3.8000001 | 0.22910E-02  | 0.25000E+00 |
| 192 | 3.8200001 | -0.20690E-02 | 0.21800E+00 |
| 193 | 3.8400001 | -0.57690E-02 | 0.18500E+00 |

|     |           |              |              |
|-----|-----------|--------------|--------------|
| 194 | 3.8600001 | -0.90890E-02 | 0.16600E+00  |
| 195 | 3.8800001 | -0.11869E-01 | 0.13900E+00  |
| 196 | 3.9000001 | -0.14289E-01 | 0.12100E+00  |
| 197 | 3.9200001 | -0.16277E-01 | 0.99400E-01  |
| 198 | 3.9400001 | -0.17985E-01 | 0.85400E-01  |
| 199 | 3.9600001 | -0.19549E-01 | 0.78200E-01  |
| 200 | 3.9800001 | -0.20805E-01 | 0.62800E-01  |
| 201 | 4.0000001 | -0.21881E-01 | 0.53800E-01  |
| 202 | 4.0200001 | -0.22603E-01 | 0.36100E-01  |
| 203 | 4.0400001 | -0.23293E-01 | 0.34500E-01  |
| 204 | 4.0600001 | -0.23873E-01 | 0.29000E-01  |
| 205 | 4.0800001 | -0.24363E-01 | 0.24500E-01  |
| 206 | 4.1000001 | -0.24577E-01 | 0.10700E-01  |
| 207 | 4.1200001 | -0.24829E-01 | 0.12600E-01  |
| 208 | 4.1400001 | -0.25031E-01 | 0.10100E-01  |
| 209 | 4.1600001 | -0.25097E-01 | 0.33000E-02  |
| 210 | 4.1800001 | -0.25036E-01 | -0.30400E-02 |
| 211 | 4.2000001 | -0.24956E-01 | -0.39900E-02 |
| 212 | 4.2200001 | -0.24867E-01 | -0.44500E-02 |
| 213 | 4.2400001 | -0.24676E-01 | -0.95700E-02 |
| 214 | 4.2600001 | -0.24477E-01 | -0.99500E-02 |
| 215 | 4.2800001 | -0.24177E-01 | -0.15000E-01 |
| 216 | 4.3000001 | -0.23815E-01 | -0.18100E-01 |
| 217 | 4.3200001 | -0.23447E-01 | -0.18400E-01 |
| 218 | 4.3400001 | -0.23073E-01 | -0.18700E-01 |
| 219 | 4.3600001 | -0.22685E-01 | -0.19400E-01 |
| 220 | 4.3800001 | -0.22285E-01 | -0.20000E-01 |
| 221 | 4.4000001 | -0.21865E-01 | -0.21000E-01 |
| 222 | 4.4200001 | -0.21425E-01 | -0.22000E-01 |
| 223 | 4.4400001 | -0.20965E-01 | -0.23000E-01 |
| 224 | 4.4600001 | -0.20467E-01 | -0.24900E-01 |
| 225 | 4.4800001 | -0.19975E-01 | -0.24600E-01 |
| 226 | 4.5000001 | -0.19491E-01 | -0.24200E-01 |
| 227 | 4.5200001 | -0.19015E-01 | -0.23800E-01 |
| 228 | 4.5400001 | -0.18547E-01 | -0.23400E-01 |
| 229 | 4.5600001 | -0.18085E-01 | -0.23100E-01 |
| 230 | 4.5800001 | -0.17631E-01 | -0.22700E-01 |
| 231 | 4.6000001 | -0.17187E-01 | -0.22200E-01 |
| 232 | 4.6200001 | -0.16745E-01 | -0.22100E-01 |
| 233 | 4.6400001 | -0.16305E-01 | -0.22000E-01 |
| 234 | 4.6600001 | -0.15867E-01 | -0.21900E-01 |
| 235 | 4.6800001 | -0.15431E-01 | -0.21800E-01 |
| 236 | 4.7000001 | -0.14997E-01 | -0.21700E-01 |
| 237 | 4.7200001 | -0.14565E-01 | -0.21600E-01 |
| 238 | 4.7400001 | -0.14137E-01 | -0.21400E-01 |
| 239 | 4.7600001 | -0.13713E-01 | -0.21200E-01 |
| 240 | 4.7800001 | -0.13293E-01 | -0.21000E-01 |
| 241 | 4.8000001 | -0.12877E-01 | -0.20800E-01 |
| 242 | 4.8200001 | -0.12463E-01 | -0.20700E-01 |
| 243 | 4.8400001 | -0.12055E-01 | -0.20400E-01 |
| 244 | 4.8600001 | -0.11653E-01 | -0.20100E-01 |
| 245 | 4.8800001 | -0.11279E-01 | -0.18700E-01 |
| 246 | 4.9000001 | -0.10919E-01 | -0.18000E-01 |
| 247 | 4.9200001 | -0.10579E-01 | -0.17000E-01 |
| 248 | 4.9400001 | -0.10257E-01 | -0.16100E-01 |
| 249 | 4.9600001 | -0.99530E-02 | -0.15200E-01 |
| 250 | 4.9800001 | -0.96550E-02 | -0.14900E-01 |
| 251 | 5.0000001 | -0.93570E-02 | -0.14900E-01 |
| 252 | 5.0200001 | -0.90590E-02 | -0.14900E-01 |
| 253 | 5.0400001 | -0.87650E-02 | -0.14700E-01 |
| 254 | 5.0600001 | -0.84750E-02 | -0.14500E-01 |
| 255 | 5.0800001 | -0.81870E-02 | -0.14400E-01 |
| 256 | 5.1000001 | -0.79050E-02 | -0.14100E-01 |
| 257 | 5.1200001 | -0.76290E-02 | -0.13800E-01 |
| 258 | 5.1400001 | -0.73570E-02 | -0.13600E-01 |
| 259 | 5.1600001 | -0.70910E-02 | -0.13300E-01 |

|     |            |              |              |
|-----|------------|--------------|--------------|
| 260 | 5.18000001 | -0.68290E-02 | -0.13100E-01 |
| 261 | 5.20000001 | -0.65710E-02 | -0.12900E-01 |
| 262 | 5.22000001 | -0.63190E-02 | -0.12600E-01 |
| 263 | 5.24000001 | -0.60710E-02 | -0.12400E-01 |
| 264 | 5.26000001 | -0.58330E-02 | -0.11900E-01 |
| 265 | 5.28000001 | -0.56030E-02 | -0.11500E-01 |
| 266 | 5.30000001 | -0.53810E-02 | -0.11100E-01 |
| 267 | 5.32000001 | -0.51670E-02 | -0.10700E-01 |
| 268 | 5.34000001 | -0.49610E-02 | -0.10300E-01 |
| 269 | 5.36000001 | -0.47624E-02 | -0.99300E-02 |
| 270 | 5.38000001 | -0.45684E-02 | -0.97000E-02 |
| 271 | 5.40000001 | -0.43754E-02 | -0.96500E-02 |
| 272 | 5.42000001 | -0.41834E-02 | -0.96000E-02 |
| 273 | 5.44000001 | -0.39926E-02 | -0.95400E-02 |
| 274 | 5.46000001 | -0.38028E-02 | -0.94900E-02 |
| 275 | 5.48000001 | -0.36142E-02 | -0.94300E-02 |
| 276 | 5.50000001 | -0.34266E-02 | -0.93800E-02 |
| 277 | 5.52000001 | -0.32402E-02 | -0.93200E-02 |
| 278 | 5.54000001 | -0.30548E-02 | -0.92700E-02 |
| 279 | 5.56000001 | -0.28706E-02 | -0.92100E-02 |
| 280 | 5.58000001 | -0.26874E-02 | -0.91600E-02 |
| 281 | 5.60000001 | -0.25052E-02 | -0.91100E-02 |
| 282 | 5.62000001 | -0.23252E-02 | -0.90000E-02 |
| 283 | 5.64000001 | -0.21472E-02 | -0.89000E-02 |
| 284 | 5.66000001 | -0.19714E-02 | -0.87900E-02 |
| 285 | 5.68000001 | -0.17976E-02 | -0.86900E-02 |
| 286 | 5.70000001 | -0.16280E-02 | -0.84800E-02 |
| 287 | 5.72000001 | -0.14626E-02 | -0.82700E-02 |
| 288 | 5.74000001 | -0.13014E-02 | -0.80600E-02 |
| 289 | 5.76000001 | -0.11444E-02 | -0.78500E-02 |
| 290 | 5.78000001 | -0.99161E-03 | -0.76400E-02 |
| 291 | 5.80000001 | -0.84301E-03 | -0.74300E-02 |
| 292 | 5.82000001 | -0.69861E-03 | -0.72200E-02 |
| 293 | 5.84000001 | -0.55841E-03 | -0.70100E-02 |
| 294 | 5.86000001 | -0.42161E-03 | -0.68400E-02 |
| 295 | 5.88000001 | -0.28981E-03 | -0.65900E-02 |
| 296 | 5.90000001 | -0.16301E-03 | -0.63400E-02 |
| 297 | 5.92000001 | -0.41205E-04 | -0.60900E-02 |
| 298 | 5.94000001 | 0.75595E-04  | -0.58400E-02 |
| 299 | 5.96000001 | 0.19079E-03  | -0.57600E-02 |
| 300 | 5.98000001 | 0.30439E-03  | -0.56800E-02 |
| 301 | 6.00000001 | 0.41639E-03  | -0.56000E-02 |
| 302 | 6.02000001 | 0.52679E-03  | -0.55200E-02 |
| 303 | 6.04000001 | 0.63559E-03  | -0.54400E-02 |
| 304 | 6.06000001 | 0.74359E-03  | -0.54000E-02 |
| 305 | 6.08000001 | 0.85079E-03  | -0.53600E-02 |
| 306 | 6.10000001 | 0.95719E-03  | -0.53200E-02 |
| 307 | 6.12000001 | 0.10628E-02  | -0.52800E-02 |
| 308 | 6.14000001 | 0.11674E-02  | -0.52300E-02 |
| 309 | 6.16000001 | 0.12634E-02  | -0.48000E-02 |
| 310 | 6.18000001 | 0.13508E-02  | -0.43700E-02 |
| 311 | 6.20000001 | 0.14296E-02  | -0.39400E-02 |
| 312 | 6.22000001 | 0.15050E-02  | -0.37700E-02 |
| 313 | 6.24000001 | 0.15744E-02  | -0.34700E-02 |
| 314 | 6.26000001 | 0.16378E-02  | -0.31700E-02 |
| 315 | 6.28000001 | 0.16952E-02  | -0.28700E-02 |
| 316 | 6.30000001 | 0.17466E-02  | -0.25700E-02 |
| 317 | 6.32000001 | 0.17920E-02  | -0.22700E-02 |
| 318 | 6.34000001 | 0.18314E-02  | -0.19700E-02 |
| 319 | 6.36000001 | 0.18648E-02  | -0.16700E-02 |
| 320 | 6.38000001 | 0.18922E-02  | -0.13700E-02 |
| 321 | 6.40000001 | 0.19186E-02  | -0.13200E-02 |
| 322 | 6.42000001 | 0.19440E-02  | -0.12700E-02 |
| 323 | 6.44000001 | 0.19684E-02  | -0.12200E-02 |
| 324 | 6.46000001 | 0.19918E-02  | -0.11700E-02 |
| 325 | 6.48000001 | 0.20142E-02  | -0.11200E-02 |

|     |           |             |              |
|-----|-----------|-------------|--------------|
| 326 | 6.5000001 | 0.20356E-02 | -0.10700E-02 |
| 327 | 6.5200001 | 0.20566E-02 | -0.10500E-02 |
| 328 | 6.5400001 | 0.20774E-02 | -0.10400E-02 |
| 329 | 6.5600001 | 0.20980E-02 | -0.10300E-02 |
| 330 | 6.5800001 | 0.21182E-02 | -0.10100E-02 |
| 331 | 6.6000001 | 0.21382E-02 | -0.10000E-02 |
| 332 | 6.6200001 | 0.21579E-02 | -0.98700E-03 |
| 333 | 6.6400001 | 0.21774E-02 | -0.97300E-03 |
| 334 | 6.6600001 | 0.21966E-02 | -0.96000E-03 |
| 335 | 6.6800001 | 0.22155E-02 | -0.94600E-03 |
| 336 | 6.7000001 | 0.22342E-02 | -0.93200E-03 |
| 337 | 6.7200001 | 0.22525E-02 | -0.91900E-03 |
| 338 | 6.7400001 | 0.22706E-02 | -0.90500E-03 |
| 339 | 6.7600001 | 0.22885E-02 | -0.89200E-03 |
| 340 | 6.7800001 | 0.23060E-02 | -0.87800E-03 |
| 341 | 6.8000001 | 0.23233E-02 | -0.86400E-03 |
| 342 | 6.8200001 | 0.23403E-02 | -0.85100E-03 |
| 343 | 6.8400001 | 0.23571E-02 | -0.83700E-03 |
| 344 | 6.8600001 | 0.23736E-02 | -0.82400E-03 |
| 345 | 6.8800001 | 0.23898E-02 | -0.81000E-03 |
| 346 | 6.9000001 | 0.24057E-02 | -0.79600E-03 |
| 347 | 6.9200001 | 0.24213E-02 | -0.78300E-03 |
| 348 | 6.9400001 | 0.24367E-02 | -0.76900E-03 |
| 349 | 6.9600001 | 0.24518E-02 | -0.75600E-03 |
| 350 | 6.9800001 | 0.24667E-02 | -0.74200E-03 |
| 351 | 7.0000001 | 0.24812E-02 | -0.72800E-03 |
| 352 | 7.0200001 | 0.24955E-02 | -0.71500E-03 |
| 353 | 7.0400001 | 0.25096E-02 | -0.70100E-03 |
| 354 | 7.0600001 | 0.25233E-02 | -0.68800E-03 |
| 355 | 7.0800001 | 0.25368E-02 | -0.67400E-03 |
| 356 | 7.1000001 | 0.25500E-02 | -0.66000E-03 |
| 357 | 7.1200001 | 0.25629E-02 | -0.64700E-03 |
| 358 | 7.1400001 | 0.25756E-02 | -0.63300E-03 |
| 359 | 7.1600001 | 0.25880E-02 | -0.62000E-03 |
| 360 | 7.1800001 | 0.26001E-02 | -0.60600E-03 |
| 361 | 7.2000001 | 0.26120E-02 | -0.59200E-03 |
| 362 | 7.2200001 | 0.26235E-02 | -0.57900E-03 |
| 363 | 7.2400001 | 0.26348E-02 | -0.56500E-03 |
| 364 | 7.2600001 | 0.26459E-02 | -0.55200E-03 |
| 365 | 7.2800001 | 0.26566E-02 | -0.53800E-03 |
| 366 | 7.3000001 | 0.26671E-02 | -0.52400E-03 |
| 367 | 7.3200001 | 0.26773E-02 | -0.51100E-03 |
| 368 | 7.3400001 | 0.26873E-02 | -0.49700E-03 |
| 369 | 7.3600001 | 0.26970E-02 | -0.48400E-03 |
| 370 | 7.3800001 | 0.27064E-02 | -0.47000E-03 |
| 371 | 7.4000001 | 0.27155E-02 | -0.45600E-03 |
| 372 | 7.4200001 | 0.27243E-02 | -0.44300E-03 |
| 373 | 7.4400001 | 0.27329E-02 | -0.42900E-03 |
| 374 | 7.4600001 | 0.27412E-02 | -0.41600E-03 |
| 375 | 7.4800001 | 0.27493E-02 | -0.40200E-03 |
| 376 | 7.5000001 | 0.27570E-02 | -0.38800E-03 |
| 377 | 7.5200001 | 0.27645E-02 | -0.37500E-03 |
| 378 | 7.5400001 | 0.27718E-02 | -0.36100E-03 |
| 379 | 7.5600001 | 0.27787E-02 | -0.34800E-03 |
| 380 | 7.5800001 | 0.27854E-02 | -0.33400E-03 |
| 381 | 7.6000001 | 0.27918E-02 | -0.32000E-03 |
| 382 | 7.6200001 | 0.27979E-02 | -0.30700E-03 |
| 383 | 7.6400001 | 0.28038E-02 | -0.29300E-03 |
| 384 | 7.6600001 | 0.28094E-02 | -0.28000E-03 |
| 385 | 7.6800001 | 0.28147E-02 | -0.26600E-03 |
| 386 | 7.7000001 | 0.28198E-02 | -0.25200E-03 |
| 387 | 7.7200001 | 0.28245E-02 | -0.23900E-03 |
| 388 | 7.7400001 | 0.28290E-02 | -0.22500E-03 |
| 389 | 7.7600001 | 0.28334E-02 | -0.21600E-03 |
| 390 | 7.7800001 | 0.28375E-02 | -0.20600E-03 |
| 391 | 7.8000001 | 0.28414E-02 | -0.19700E-03 |

|     |           |             |              |
|-----|-----------|-------------|--------------|
| 392 | 7.8200001 | 0.28452E-02 | -0.18700E-03 |
| 393 | 7.8400001 | 0.28487E-02 | -0.17800E-03 |
| 394 | 7.8600001 | 0.28521E-02 | -0.16800E-03 |
| 395 | 7.8800001 | 0.28553E-02 | -0.15900E-03 |
| 396 | 7.9000001 | 0.28582E-02 | -0.14900E-03 |
| 397 | 7.9200001 | 0.28610E-02 | -0.14000E-03 |
| 398 | 7.9400001 | 0.28637E-02 | -0.13100E-03 |
| 399 | 7.9600001 | 0.28661E-02 | -0.12100E-03 |
| 400 | 7.9800001 | 0.28683E-02 | -0.11200E-03 |
| 401 | 8.0000001 | 0.28704E-02 | -0.10200E-03 |
| 402 | 8.0200001 | 0.28722E-02 | -0.92700E-04 |
| 403 | 8.0400001 | 0.28739E-02 | -0.83300E-04 |
| 404 | 8.0600001 | 0.28754E-02 | -0.73800E-04 |
| 405 | 8.0800001 | 0.28766E-02 | -0.64300E-04 |
| 406 | 8.1000001 | 0.28777E-02 | -0.54900E-04 |
| 407 | 8.1200001 | 0.28786E-02 | -0.45400E-04 |
| 408 | 8.1400001 | 0.28794E-02 | -0.35900E-04 |
| 409 | 8.1600001 | 0.28799E-02 | -0.26500E-04 |
| 410 | 8.1800001 | 0.28802E-02 | -0.17000E-04 |
| 411 | 8.2000001 | 0.28804E-02 | -0.75400E-05 |
| 412 | 8.2200001 | 0.28803E-02 | 0.19200E-05  |
| 413 | 8.2400001 | 0.28801E-02 | 0.11400E-04  |
| 414 | 8.2600001 | 0.28797E-02 | 0.20800E-04  |
| 415 | 8.2800001 | 0.28791E-02 | 0.30300E-04  |
| 416 | 8.3000001 | 0.28783E-02 | 0.39800E-04  |
| 417 | 8.3200001 | 0.28773E-02 | 0.49200E-04  |
| 418 | 8.3400001 | 0.28761E-02 | 0.58700E-04  |
| 419 | 8.3600001 | 0.28748E-02 | 0.68200E-04  |
| 420 | 8.3800001 | 0.28732E-02 | 0.77600E-04  |
| 421 | 8.4000001 | 0.28715E-02 | 0.87100E-04  |
| 422 | 8.4200001 | 0.28695E-02 | 0.96600E-04  |
| 423 | 8.4400001 | 0.28674E-02 | 0.10600E-03  |
| 424 | 8.4600001 | 0.28651E-02 | 0.11500E-03  |
| 425 | 8.4800001 | 0.28626E-02 | 0.12500E-03  |
| 426 | 8.5000001 | 0.28599E-02 | 0.13400E-03  |
| 427 | 8.5200001 | 0.28571E-02 | 0.14400E-03  |
| 428 | 8.5400001 | 0.28540E-02 | 0.15300E-03  |
| 429 | 8.5600001 | 0.28507E-02 | 0.16300E-03  |
| 430 | 8.5800001 | 0.28473E-02 | 0.17200E-03  |
| 431 | 8.6000001 | 0.28437E-02 | 0.18200E-03  |
| 432 | 8.6200001 | 0.28398E-02 | 0.19100E-03  |
| 433 | 8.6400001 | 0.28358E-02 | 0.20100E-03  |
| 434 | 8.6600001 | 0.28316E-02 | 0.21000E-03  |
| 435 | 8.6800001 | 0.28272E-02 | 0.22000E-03  |
| 436 | 8.7000001 | 0.28226E-02 | 0.22900E-03  |
| 437 | 8.7200001 | 0.28179E-02 | 0.23900E-03  |
| 438 | 8.7400001 | 0.28129E-02 | 0.24800E-03  |
| 439 | 8.7600001 | 0.28078E-02 | 0.25700E-03  |
| 440 | 8.7800001 | 0.28024E-02 | 0.26700E-03  |
| 441 | 8.8000001 | 0.27969E-02 | 0.27600E-03  |
| 442 | 8.8200001 | 0.27912E-02 | 0.28600E-03  |
| 443 | 8.8400001 | 0.27853E-02 | 0.29500E-03  |
| 444 | 8.8600001 | 0.27792E-02 | 0.30500E-03  |
| 445 | 8.8800001 | 0.27729E-02 | 0.31400E-03  |
| 446 | 8.9000001 | 0.27664E-02 | 0.32400E-03  |
| 447 | 8.9200001 | 0.27598E-02 | 0.33300E-03  |
| 448 | 8.9400001 | 0.27529E-02 | 0.34300E-03  |
| 449 | 8.9600001 | 0.27459E-02 | 0.35200E-03  |
| 450 | 8.9800001 | 0.27386E-02 | 0.36200E-03  |
| 451 | 9.0000001 | 0.27312E-02 | 0.37100E-03  |
| 452 | 9.0200001 | 0.27236E-02 | 0.38000E-03  |
| 453 | 9.0400001 | 0.27158E-02 | 0.39000E-03  |
| 454 | 9.0600001 | 0.27078E-02 | 0.39900E-03  |
| 455 | 9.0800001 | 0.26996E-02 | 0.40900E-03  |
| 456 | 9.1000001 | 0.26913E-02 | 0.41800E-03  |
| 457 | 9.1200001 | 0.26827E-02 | 0.42800E-03  |

|     |            |             |             |
|-----|------------|-------------|-------------|
| 458 | 9.1400001  | 0.26740E-02 | 0.43700E-03 |
| 459 | 9.1600001  | 0.26650E-02 | 0.44700E-03 |
| 460 | 9.1800001  | 0.26559E-02 | 0.45600E-03 |
| 461 | 9.2000001  | 0.26466E-02 | 0.46600E-03 |
| 462 | 9.2200001  | 0.26371E-02 | 0.47500E-03 |
| 463 | 9.2400001  | 0.26274E-02 | 0.48500E-03 |
| 464 | 9.2600001  | 0.26175E-02 | 0.49400E-03 |
| 465 | 9.2800001  | 0.26075E-02 | 0.50300E-03 |
| 466 | 9.3000001  | 0.25972E-02 | 0.51300E-03 |
| 467 | 9.3200001  | 0.25868E-02 | 0.52200E-03 |
| 468 | 9.3400001  | 0.25761E-02 | 0.53200E-03 |
| 469 | 9.3600001  | 0.25653E-02 | 0.54100E-03 |
| 470 | 9.3800001  | 0.25543E-02 | 0.55100E-03 |
| 471 | 9.4000001  | 0.25431E-02 | 0.56000E-03 |
| 472 | 9.4200001  | 0.25317E-02 | 0.57000E-03 |
| 473 | 9.4400001  | 0.25201E-02 | 0.57900E-03 |
| 474 | 9.4600001  | 0.25083E-02 | 0.58900E-03 |
| 475 | 9.4800001  | 0.24964E-02 | 0.59800E-03 |
| 476 | 9.5000001  | 0.24842E-02 | 0.60800E-03 |
| 477 | 9.5200001  | 0.24719E-02 | 0.61700E-03 |
| 478 | 9.5400001  | 0.24593E-02 | 0.62600E-03 |
| 479 | 9.5600001  | 0.24466E-02 | 0.63600E-03 |
| 480 | 9.5800001  | 0.24337E-02 | 0.64500E-03 |
| 481 | 9.6000001  | 0.24206E-02 | 0.65500E-03 |
| 482 | 9.6200001  | 0.24073E-02 | 0.66400E-03 |
| 483 | 9.6400001  | 0.23939E-02 | 0.67400E-03 |
| 484 | 9.6600001  | 0.23802E-02 | 0.68300E-03 |
| 485 | 9.6800001  | 0.23663E-02 | 0.69300E-03 |
| 486 | 9.7000001  | 0.23523E-02 | 0.70200E-03 |
| 487 | 9.7200001  | 0.23381E-02 | 0.71200E-03 |
| 488 | 9.7400001  | 0.23236E-02 | 0.72100E-03 |
| 489 | 9.7600001  | 0.23090E-02 | 0.73100E-03 |
| 490 | 9.7800001  | 0.22942E-02 | 0.74000E-03 |
| 491 | 9.8000001  | 0.22792E-02 | 0.75000E-03 |
| 492 | 9.8200001  | 0.22640E-02 | 0.75900E-03 |
| 493 | 9.8400001  | 0.22487E-02 | 0.76800E-03 |
| 494 | 9.8600001  | 0.22331E-02 | 0.77800E-03 |
| 495 | 9.8800001  | 0.22174E-02 | 0.78700E-03 |
| 496 | 9.9000001  | 0.22014E-02 | 0.79700E-03 |
| 497 | 9.9200001  | 0.21853E-02 | 0.80600E-03 |
| 498 | 9.9400001  | 0.21690E-02 | 0.81600E-03 |
| 499 | 9.9600001  | 0.21525E-02 | 0.82500E-03 |
| 500 | 9.9800001  | 0.21358E-02 | 0.83500E-03 |
| 501 | 10.0000001 | 0.21189E-02 | 0.84400E-03 |
| 502 | 10.0200001 | 0.21018E-02 | 0.85400E-03 |
| 503 | 10.0400001 | 0.20846E-02 | 0.86300E-03 |
| 504 | 10.0600001 | 0.20671E-02 | 0.87300E-03 |
| 505 | 10.0800001 | 0.20495E-02 | 0.88200E-03 |
| 506 | 10.1000001 | 0.20317E-02 | 0.89100E-03 |
| 507 | 10.1200001 | 0.20136E-02 | 0.90100E-03 |
| 508 | 10.1400001 | 0.19954E-02 | 0.91000E-03 |
| 509 | 10.1600001 | 0.19770E-02 | 0.92000E-03 |
| 510 | 10.1800001 | 0.19585E-02 | 0.92900E-03 |
| 511 | 10.2000001 | 0.19397E-02 | 0.93900E-03 |
| 512 | 10.2200001 | 0.19207E-02 | 0.94800E-03 |
| 513 | 10.2400001 | 0.19016E-02 | 0.95800E-03 |
| 514 | 10.2600001 | 0.18822E-02 | 0.96700E-03 |
| 515 | 10.2800001 | 0.18627E-02 | 0.97700E-03 |
| 516 | 10.3000001 | 0.18430E-02 | 0.98600E-03 |
| 517 | 10.3200001 | 0.18230E-02 | 0.99600E-03 |
| 518 | 10.3400001 | 0.18028E-02 | 0.10100E-02 |
| 519 | 10.3600001 | 0.17826E-02 | 0.10100E-02 |
| 520 | 10.3800001 | 0.17622E-02 | 0.10200E-02 |
| 521 | 10.4000001 | 0.17416E-02 | 0.10300E-02 |
| 522 | 10.4200001 | 0.17208E-02 | 0.10400E-02 |
| 523 | 10.4400001 | 0.16998E-02 | 0.10500E-02 |



|     |            |              |             |
|-----|------------|--------------|-------------|
| 524 | 10.4600001 | 0.16786E-02  | 0.10600E-02 |
| 525 | 10.4800001 | 0.16572E-02  | 0.10700E-02 |
| 526 | 10.5000001 | 0.16356E-02  | 0.10800E-02 |
| 527 | 10.5200001 | 0.16138E-02  | 0.10900E-02 |
| 528 | 10.5400001 | 0.15918E-02  | 0.11000E-02 |
| 529 | 10.5600001 | 0.15696E-02  | 0.11100E-02 |
| 530 | 10.5800001 | 0.15472E-02  | 0.11200E-02 |
| 531 | 10.6000001 | 0.15246E-02  | 0.11300E-02 |
| 532 | 10.6200001 | 0.15018E-02  | 0.11400E-02 |
| 533 | 10.6400001 | 0.14788E-02  | 0.11500E-02 |
| 534 | 10.6600001 | 0.14556E-02  | 0.11600E-02 |
| 535 | 10.6800001 | 0.14322E-02  | 0.11700E-02 |
| 536 | 10.7000001 | 0.14086E-02  | 0.11800E-02 |
| 537 | 10.7200001 | 0.13850E-02  | 0.11800E-02 |
| 538 | 10.7400001 | 0.13612E-02  | 0.11900E-02 |
| 539 | 10.7600001 | 0.13372E-02  | 0.12000E-02 |
| 540 | 10.7800001 | 0.13130E-02  | 0.12100E-02 |
| 541 | 10.8000001 | 0.12886E-02  | 0.12200E-02 |
| 542 | 10.8200001 | 0.12640E-02  | 0.12300E-02 |
| 543 | 10.8400001 | 0.12392E-02  | 0.12400E-02 |
| 544 | 10.8600001 | 0.12142E-02  | 0.12500E-02 |
| 545 | 10.8800001 | 0.11890E-02  | 0.12600E-02 |
| 546 | 10.9000001 | 0.11636E-02  | 0.12700E-02 |
| 547 | 10.9200001 | 0.11380E-02  | 0.12800E-02 |
| 548 | 10.9400001 | 0.11122E-02  | 0.12900E-02 |
| 549 | 10.9600001 | 0.10862E-02  | 0.13000E-02 |
| 550 | 10.9800001 | 0.10600E-02  | 0.13100E-02 |
| 551 | 11.0000001 | 0.10336E-02  | 0.13200E-02 |
| 552 | 11.0200001 | 0.10070E-02  | 0.13300E-02 |
| 553 | 11.0400001 | 0.98025E-03  | 0.13400E-02 |
| 554 | 11.0600001 | 0.95325E-03  | 0.13500E-02 |
| 555 | 11.0800001 | 0.92605E-03  | 0.13600E-02 |
| 556 | 11.1000001 | 0.89885E-03  | 0.13600E-02 |
| 557 | 11.1200001 | 0.87145E-03  | 0.13700E-02 |
| 558 | 11.1400001 | 0.84385E-03  | 0.13800E-02 |
| 559 | 11.1600001 | 0.81605E-03  | 0.13900E-02 |
| 560 | 11.1800001 | 0.78805E-03  | 0.14000E-02 |
| 561 | 11.2000001 | 0.75985E-03  | 0.14100E-02 |
| 562 | 11.2200001 | 0.73145E-03  | 0.14200E-02 |
| 563 | 11.2400001 | 0.70285E-03  | 0.14300E-02 |
| 564 | 11.2600001 | 0.67405E-03  | 0.14400E-02 |
| 565 | 11.2800001 | 0.64505E-03  | 0.14500E-02 |
| 566 | 11.3000001 | 0.61605E-03  | 0.14500E-02 |
| 567 | 11.3200001 | 0.58705E-03  | 0.14500E-02 |
| 568 | 11.3400001 | 0.55805E-03  | 0.14500E-02 |
| 569 | 11.3600001 | 0.52885E-03  | 0.14600E-02 |
| 570 | 11.3800001 | 0.49965E-03  | 0.14600E-02 |
| 571 | 11.4000001 | 0.47045E-03  | 0.14600E-02 |
| 572 | 11.4200001 | 0.44125E-03  | 0.14600E-02 |
| 573 | 11.4400001 | 0.41205E-03  | 0.14600E-02 |
| 574 | 11.4600001 | 0.38285E-03  | 0.14600E-02 |
| 575 | 11.4800001 | 0.35365E-03  | 0.14600E-02 |
| 576 | 11.5000001 | 0.32425E-03  | 0.14700E-02 |
| 577 | 11.5200001 | 0.29485E-03  | 0.14700E-02 |
| 578 | 11.5400001 | 0.26545E-03  | 0.14700E-02 |
| 579 | 11.5600001 | 0.23605E-03  | 0.14700E-02 |
| 580 | 11.5800001 | 0.20665E-03  | 0.14700E-02 |
| 581 | 11.6000001 | 0.17725E-03  | 0.14700E-02 |
| 582 | 11.6200001 | 0.14785E-03  | 0.14700E-02 |
| 583 | 11.6400001 | 0.11845E-03  | 0.14700E-02 |
| 584 | 11.6600001 | 0.88849E-04  | 0.14800E-02 |
| 585 | 11.6800001 | 0.59249E-04  | 0.14800E-02 |
| 586 | 11.7000001 | 0.29649E-04  | 0.14800E-02 |
| 587 | 11.7200001 | 0.48999E-07  | 0.14800E-02 |
| 588 | 11.7400001 | -0.29551E-04 | 0.14800E-02 |
| 589 | 11.7600001 | -0.29551E-04 | 0.00000E+00 |

|     |            |              |              |
|-----|------------|--------------|--------------|
| 590 | 11.7800001 | 0.000000E+00 | 0.000000E+00 |
| 591 | 11.8000001 | 0.000000E+00 | 0.000000E+00 |
| 592 | 11.8200001 | 0.000000E+00 | 0.000000E+00 |
| 593 | 11.8400001 | 0.000000E+00 | 0.000000E+00 |
| 594 | 11.8600001 | 0.000000E+00 | 0.000000E+00 |
| 595 | 11.8800001 | 0.000000E+00 | 0.000000E+00 |
| 596 | 11.9000001 | 0.000000E+00 | 0.000000E+00 |
| 597 | 11.9200001 | 0.000000E+00 | 0.000000E+00 |
| 598 | 11.9400001 | 0.000000E+00 | 0.000000E+00 |
| 599 | 11.9600001 | 0.000000E+00 | 0.000000E+00 |
| 600 | 11.9800001 | 0.000000E+00 | 0.000000E+00 |
