# Supplementary material
Source: MDPI journal article supplement (https://www.mdpi.com/2226-4310/5/1/1)
Supplement: s1 [file s1]

# Tabulated potential for N1-N1

N1-N1

N 600 R 0.0000001 11.9800001

|    |           |             |             |
|----|-----------|-------------|-------------|
| 1  | 0.0000001 | 0.56422E+05 | 0.48400E+05 |
| 2  | 0.0200001 | 0.55462E+05 | 0.48000E+05 |
| 3  | 0.0400001 | 0.54510E+05 | 0.47600E+05 |
| 4  | 0.0600001 | 0.53566E+05 | 0.47200E+05 |
| 5  | 0.0800001 | 0.52630E+05 | 0.46800E+05 |
| 6  | 0.1000001 | 0.51702E+05 | 0.46400E+05 |
| 7  | 0.1200001 | 0.50782E+05 | 0.46000E+05 |
| 8  | 0.1400001 | 0.49870E+05 | 0.45600E+05 |
| 9  | 0.1600001 | 0.48968E+05 | 0.45100E+05 |
| 10 | 0.1800001 | 0.48074E+05 | 0.44700E+05 |
| 11 | 0.2000001 | 0.47188E+05 | 0.44300E+05 |
| 12 | 0.2200001 | 0.46310E+05 | 0.43900E+05 |
| 13 | 0.2400001 | 0.45440E+05 | 0.43500E+05 |
| 14 | 0.2600001 | 0.44578E+05 | 0.43100E+05 |
| 15 | 0.2800001 | 0.43724E+05 | 0.42700E+05 |
| 16 | 0.3000001 | 0.42878E+05 | 0.42300E+05 |
| 17 | 0.3200001 | 0.42042E+05 | 0.41800E+05 |
| 18 | 0.3400001 | 0.41214E+05 | 0.41400E+05 |
| 19 | 0.3600001 | 0.40394E+05 | 0.41000E+05 |
| 20 | 0.3800001 | 0.39582E+05 | 0.40600E+05 |
| 21 | 0.4000001 | 0.38778E+05 | 0.40200E+05 |
| 22 | 0.4200001 | 0.37982E+05 | 0.39800E+05 |
| 23 | 0.4400001 | 0.37194E+05 | 0.39400E+05 |
| 24 | 0.4600001 | 0.36416E+05 | 0.38900E+05 |
| 25 | 0.4800001 | 0.35646E+05 | 0.38500E+05 |
| 26 | 0.5000001 | 0.34884E+05 | 0.38100E+05 |
| 27 | 0.5200001 | 0.34130E+05 | 0.37700E+05 |
| 28 | 0.5400001 | 0.33384E+05 | 0.37300E+05 |
| 29 | 0.5600001 | 0.32646E+05 | 0.36900E+05 |
| 30 | 0.5800001 | 0.31916E+05 | 0.36500E+05 |
| 31 | 0.6000001 | 0.31194E+05 | 0.36100E+05 |
| 32 | 0.6200001 | 0.30482E+05 | 0.35600E+05 |
| 33 | 0.6400001 | 0.29778E+05 | 0.35200E+05 |
| 34 | 0.6600001 | 0.29082E+05 | 0.34800E+05 |
| 35 | 0.6800001 | 0.28394E+05 | 0.34400E+05 |
| 36 | 0.7000001 | 0.27714E+05 | 0.34000E+05 |
| 37 | 0.7200001 | 0.27042E+05 | 0.33600E+05 |
| 38 | 0.7400001 | 0.26378E+05 | 0.33200E+05 |
| 39 | 0.7600001 | 0.25722E+05 | 0.32800E+05 |
| 40 | 0.7800001 | 0.25076E+05 | 0.32300E+05 |
| 41 | 0.8000001 | 0.24438E+05 | 0.31900E+05 |
| 42 | 0.8200001 | 0.23808E+05 | 0.31500E+05 |
| 43 | 0.8400001 | 0.23186E+05 | 0.31100E+05 |
| 44 | 0.8600001 | 0.22572E+05 | 0.30700E+05 |
| 45 | 0.8800001 | 0.21966E+05 | 0.30300E+05 |
| 46 | 0.9000001 | 0.21368E+05 | 0.29900E+05 |
| 47 | 0.9200001 | 0.20778E+05 | 0.29500E+05 |
| 48 | 0.9400001 | 0.20198E+05 | 0.29000E+05 |
| 49 | 0.9600001 | 0.19626E+05 | 0.28600E+05 |
| 50 | 0.9800001 | 0.19062E+05 | 0.28200E+05 |
| 51 | 1.0000001 | 0.18506E+05 | 0.27800E+05 |
| 52 | 1.0200001 | 0.17958E+05 | 0.27400E+05 |
| 53 | 1.0400001 | 0.17418E+05 | 0.27000E+05 |
| 54 | 1.0600001 | 0.16886E+05 | 0.26600E+05 |
| 55 | 1.0800001 | 0.16364E+05 | 0.26100E+05 |
| 56 | 1.1000001 | 0.15850E+05 | 0.25700E+05 |
| 57 | 1.1200001 | 0.15344E+05 | 0.25300E+05 |
| 58 | 1.1400001 | 0.14846E+05 | 0.24900E+05 |
| 59 | 1.1600001 | 0.14356E+05 | 0.24500E+05 |
| 60 | 1.1800001 | 0.13874E+05 | 0.24100E+05 |
| 61 | 1.2000001 | 0.13400E+05 | 0.23700E+05 |

|     |           |             |             |
|-----|-----------|-------------|-------------|
| 62  | 1.2200001 | 0.12934E+05 | 0.23300E+05 |
| 63  | 1.2400001 | 0.12478E+05 | 0.22800E+05 |
| 64  | 1.2600001 | 0.12030E+05 | 0.22400E+05 |
| 65  | 1.2800001 | 0.11590E+05 | 0.22000E+05 |
| 66  | 1.3000001 | 0.11158E+05 | 0.21600E+05 |
| 67  | 1.3200001 | 0.10734E+05 | 0.21200E+05 |
| 68  | 1.3400001 | 0.10318E+05 | 0.20800E+05 |
| 69  | 1.3600001 | 0.99098E+04 | 0.20400E+05 |
| 70  | 1.3800001 | 0.95098E+04 | 0.20000E+05 |
| 71  | 1.4000001 | 0.91198E+04 | 0.19500E+05 |
| 72  | 1.4200001 | 0.87378E+04 | 0.19100E+05 |
| 73  | 1.4400001 | 0.83638E+04 | 0.18700E+05 |
| 74  | 1.4600001 | 0.79978E+04 | 0.18300E+05 |
| 75  | 1.4800001 | 0.76398E+04 | 0.17900E+05 |
| 76  | 1.5000001 | 0.72898E+04 | 0.17500E+05 |
| 77  | 1.5200001 | 0.69478E+04 | 0.17100E+05 |
| 78  | 1.5400001 | 0.66158E+04 | 0.16600E+05 |
| 79  | 1.5600001 | 0.62918E+04 | 0.16200E+05 |
| 80  | 1.5800001 | 0.59758E+04 | 0.15800E+05 |
| 81  | 1.6000001 | 0.56678E+04 | 0.15400E+05 |
| 82  | 1.6200001 | 0.53678E+04 | 0.15000E+05 |
| 83  | 1.6400001 | 0.50758E+04 | 0.14600E+05 |
| 84  | 1.6600001 | 0.47918E+04 | 0.14200E+05 |
| 85  | 1.6800001 | 0.45158E+04 | 0.13800E+05 |
| 86  | 1.7000001 | 0.42498E+04 | 0.13300E+05 |
| 87  | 1.7200001 | 0.39918E+04 | 0.12900E+05 |
| 88  | 1.7400001 | 0.37418E+04 | 0.12500E+05 |
| 89  | 1.7600001 | 0.34998E+04 | 0.12100E+05 |
| 90  | 1.7800001 | 0.32658E+04 | 0.11700E+05 |
| 91  | 1.8000001 | 0.30398E+04 | 0.11300E+05 |
| 92  | 1.8200001 | 0.28218E+04 | 0.10900E+05 |
| 93  | 1.8400001 | 0.26118E+04 | 0.10500E+05 |
| 94  | 1.8600001 | 0.24118E+04 | 0.10000E+05 |
| 95  | 1.8800001 | 0.22192E+04 | 0.96300E+04 |
| 96  | 1.9000001 | 0.20350E+04 | 0.92100E+04 |
| 97  | 1.9200001 | 0.18590E+04 | 0.88000E+04 |
| 98  | 1.9400001 | 0.16912E+04 | 0.83900E+04 |
| 99  | 1.9600001 | 0.15318E+04 | 0.79700E+04 |
| 100 | 1.9800001 | 0.13806E+04 | 0.75600E+04 |
| 101 | 2.0000001 | 0.12376E+04 | 0.71500E+04 |
| 102 | 2.0200001 | 0.11028E+04 | 0.67400E+04 |
| 103 | 2.0400001 | 0.97638E+03 | 0.63200E+04 |
| 104 | 2.0600001 | 0.85818E+03 | 0.59100E+04 |
| 105 | 2.0800001 | 0.74818E+03 | 0.55000E+04 |
| 106 | 2.1000001 | 0.64658E+03 | 0.50800E+04 |
| 107 | 2.1200001 | 0.55318E+03 | 0.46700E+04 |
| 108 | 2.1400001 | 0.46798E+03 | 0.42600E+04 |
| 109 | 2.1600001 | 0.39118E+03 | 0.38400E+04 |
| 110 | 2.1800001 | 0.32258E+03 | 0.34300E+04 |
| 111 | 2.2000001 | 0.26218E+03 | 0.30200E+04 |
| 112 | 2.2200001 | 0.20998E+03 | 0.26100E+04 |
| 113 | 2.2400001 | 0.16618E+03 | 0.21900E+04 |
| 114 | 2.2600001 | 0.13058E+03 | 0.17800E+04 |
| 115 | 2.2800001 | 0.10318E+03 | 0.13700E+04 |
| 116 | 2.3000001 | 0.81976E+02 | 0.10600E+04 |
| 117 | 2.3200001 | 0.65536E+02 | 0.82200E+03 |
| 118 | 2.3400001 | 0.52676E+02 | 0.64300E+03 |
| 119 | 2.3600001 | 0.42556E+02 | 0.50600E+03 |
| 120 | 2.3800001 | 0.34536E+02 | 0.40100E+03 |
| 121 | 2.4000001 | 0.28156E+02 | 0.31900E+03 |
| 122 | 2.4200001 | 0.23056E+02 | 0.25500E+03 |
| 123 | 2.4400001 | 0.18956E+02 | 0.20500E+03 |
| 124 | 2.4600001 | 0.15656E+02 | 0.16500E+03 |
| 125 | 2.4800001 | 0.12976E+02 | 0.13400E+03 |
| 126 | 2.5000001 | 0.10796E+02 | 0.10900E+03 |
| 127 | 2.5200001 | 0.90123E+01 | 0.89200E+02 |

|     |           |              |              |
|-----|-----------|--------------|--------------|
| 128 | 2.5400001 | 0.75483E+01  | 0.73200E+02  |
| 129 | 2.5600001 | 0.63403E+01  | 0.60400E+02  |
| 130 | 2.5800001 | 0.53423E+01  | 0.49900E+02  |
| 131 | 2.6000001 | 0.45143E+01  | 0.41400E+02  |
| 132 | 2.6200001 | 0.38243E+01  | 0.34500E+02  |
| 133 | 2.6400001 | 0.32483E+01  | 0.28800E+02  |
| 134 | 2.6600001 | 0.27663E+01  | 0.24100E+02  |
| 135 | 2.6800001 | 0.23603E+01  | 0.20300E+02  |
| 136 | 2.7000001 | 0.20183E+01  | 0.17100E+02  |
| 137 | 2.7200001 | 0.17283E+01  | 0.14500E+02  |
| 138 | 2.7400001 | 0.14823E+01  | 0.12300E+02  |
| 139 | 2.7600001 | 0.12743E+01  | 0.10400E+02  |
| 140 | 2.7800001 | 0.10969E+01  | 0.88700E+01  |
| 141 | 2.8000001 | 0.94546E+00  | 0.75700E+01  |
| 142 | 2.8200001 | 0.81586E+00  | 0.64800E+01  |
| 143 | 2.8400001 | 0.70486E+00  | 0.55500E+01  |
| 144 | 2.8600001 | 0.60946E+00  | 0.47700E+01  |
| 145 | 2.8800001 | 0.52726E+00  | 0.41100E+01  |
| 146 | 2.9000001 | 0.45646E+00  | 0.35400E+01  |
| 147 | 2.9200001 | 0.39526E+00  | 0.30600E+01  |
| 148 | 2.9400001 | 0.34226E+00  | 0.26500E+01  |
| 149 | 2.9600001 | 0.29646E+00  | 0.22900E+01  |
| 150 | 2.9800001 | 0.25666E+00  | 0.19900E+01  |
| 151 | 3.0000001 | 0.22206E+00  | 0.17300E+01  |
| 152 | 3.0200001 | 0.19206E+00  | 0.15000E+01  |
| 153 | 3.0400001 | 0.16586E+00  | 0.13100E+01  |
| 154 | 3.0600001 | 0.14306E+00  | 0.11400E+01  |
| 155 | 3.0800001 | 0.12312E+00  | 0.99700E+00  |
| 156 | 3.1000001 | 0.10570E+00  | 0.87100E+00  |
| 157 | 3.1200001 | 0.90460E-01  | 0.76200E+00  |
| 158 | 3.1400001 | 0.77140E-01  | 0.66600E+00  |
| 159 | 3.1600001 | 0.65480E-01  | 0.58300E+00  |
| 160 | 3.1800001 | 0.55260E-01  | 0.51100E+00  |
| 161 | 3.2000001 | 0.46320E-01  | 0.44700E+00  |
| 162 | 3.2200001 | 0.38460E-01  | 0.39300E+00  |
| 163 | 3.2400001 | 0.31580E-01  | 0.34400E+00  |
| 164 | 3.2600001 | 0.25560E-01  | 0.30100E+00  |
| 165 | 3.2800001 | 0.20280E-01  | 0.26400E+00  |
| 166 | 3.3000001 | 0.15660E-01  | 0.23100E+00  |
| 167 | 3.3200001 | 0.11600E-01  | 0.20300E+00  |
| 168 | 3.3400001 | 0.80603E-02  | 0.17700E+00  |
| 169 | 3.3600001 | 0.49603E-02  | 0.15500E+00  |
| 170 | 3.3800001 | 0.22403E-02  | 0.13600E+00  |
| 171 | 3.4000001 | -0.11968E-03 | 0.11800E+00  |
| 172 | 3.4200001 | -0.21797E-02 | 0.10300E+00  |
| 173 | 3.4400001 | -0.39777E-02 | 0.89900E-01  |
| 174 | 3.4600001 | -0.55317E-02 | 0.77700E-01  |
| 175 | 3.4800001 | -0.68777E-02 | 0.67300E-01  |
| 176 | 3.5000001 | -0.80397E-02 | 0.58100E-01  |
| 177 | 3.5200001 | -0.90397E-02 | 0.50000E-01  |
| 178 | 3.5400001 | -0.98937E-02 | 0.42700E-01  |
| 179 | 3.5600001 | -0.10628E-01 | 0.36700E-01  |
| 180 | 3.5800001 | -0.11246E-01 | 0.30900E-01  |
| 181 | 3.6000001 | -0.11760E-01 | 0.25700E-01  |
| 182 | 3.6200001 | -0.12190E-01 | 0.21500E-01  |
| 183 | 3.6400001 | -0.12546E-01 | 0.17800E-01  |
| 184 | 3.6600001 | -0.12834E-01 | 0.14400E-01  |
| 185 | 3.6800001 | -0.13062E-01 | 0.11400E-01  |
| 186 | 3.7000001 | -0.13228E-01 | 0.83000E-02  |
| 187 | 3.7200001 | -0.13354E-01 | 0.63400E-02  |
| 188 | 3.7400001 | -0.13449E-01 | 0.47200E-02  |
| 189 | 3.7600001 | -0.13503E-01 | 0.27200E-02  |
| 190 | 3.7800001 | -0.13522E-01 | 0.92300E-03  |
| 191 | 3.8000001 | -0.13517E-01 | -0.21800E-03 |
| 192 | 3.8200001 | -0.13490E-01 | -0.13500E-02 |
| 193 | 3.8400001 | -0.13447E-01 | -0.21800E-02 |

|     |            |              |              |
|-----|------------|--------------|--------------|
| 194 | 3.86000001 | -0.13377E-01 | -0.34900E-02 |
| 195 | 3.88000001 | -0.13301E-01 | -0.38000E-02 |
| 196 | 3.90000001 | -0.13212E-01 | -0.44400E-02 |
| 197 | 3.92000001 | -0.13109E-01 | -0.51700E-02 |
| 198 | 3.94000001 | -0.12995E-01 | -0.56900E-02 |
| 199 | 3.96000001 | -0.12880E-01 | -0.57500E-02 |
| 200 | 3.98000001 | -0.12754E-01 | -0.62900E-02 |
| 201 | 4.00000001 | -0.12628E-01 | -0.63200E-02 |
| 202 | 4.02000001 | -0.12491E-01 | -0.68300E-02 |
| 203 | 4.04000001 | -0.12353E-01 | -0.69300E-02 |
| 204 | 4.06000001 | -0.12212E-01 | -0.70200E-02 |
| 205 | 4.08000001 | -0.12070E-01 | -0.71200E-02 |
| 206 | 4.10000001 | -0.11926E-01 | -0.72100E-02 |
| 207 | 4.12000001 | -0.11777E-01 | -0.74400E-02 |
| 208 | 4.14000001 | -0.11630E-01 | -0.73400E-02 |
| 209 | 4.16000001 | -0.11485E-01 | -0.72400E-02 |
| 210 | 4.18000001 | -0.11342E-01 | -0.71400E-02 |
| 211 | 4.20000001 | -0.11201E-01 | -0.70500E-02 |
| 212 | 4.22000001 | -0.11062E-01 | -0.69600E-02 |
| 213 | 4.24000001 | -0.10925E-01 | -0.68800E-02 |
| 214 | 4.26000001 | -0.10789E-01 | -0.67900E-02 |
| 215 | 4.28000001 | -0.10655E-01 | -0.66800E-02 |
| 216 | 4.30000001 | -0.10528E-01 | -0.63600E-02 |
| 217 | 4.32000001 | -0.10405E-01 | -0.61300E-02 |
| 218 | 4.34000001 | -0.10284E-01 | -0.60900E-02 |
| 219 | 4.36000001 | -0.10163E-01 | -0.60300E-02 |
| 220 | 4.38000001 | -0.10045E-01 | -0.59200E-02 |
| 221 | 4.40000001 | -0.99288E-02 | -0.57900E-02 |
| 222 | 4.42000001 | -0.98156E-02 | -0.56600E-02 |
| 223 | 4.44000001 | -0.97048E-02 | -0.55400E-02 |
| 224 | 4.46000001 | -0.95968E-02 | -0.54000E-02 |
| 225 | 4.48000001 | -0.94916E-02 | -0.52600E-02 |
| 226 | 4.50000001 | -0.93892E-02 | -0.51200E-02 |
| 227 | 4.52000001 | -0.92910E-02 | -0.49100E-02 |
| 228 | 4.54000001 | -0.91948E-02 | -0.48100E-02 |
| 229 | 4.56000001 | -0.91006E-02 | -0.47100E-02 |
| 230 | 4.58000001 | -0.90084E-02 | -0.46100E-02 |
| 231 | 4.60000001 | -0.89188E-02 | -0.44800E-02 |
| 232 | 4.62000001 | -0.88318E-02 | -0.43500E-02 |
| 233 | 4.64000001 | -0.87510E-02 | -0.40400E-02 |
| 234 | 4.66000001 | -0.86714E-02 | -0.39800E-02 |
| 235 | 4.68000001 | -0.85924E-02 | -0.39500E-02 |
| 236 | 4.70000001 | -0.85150E-02 | -0.38700E-02 |
| 237 | 4.72000001 | -0.84394E-02 | -0.37800E-02 |
| 238 | 4.74000001 | -0.83654E-02 | -0.37000E-02 |
| 239 | 4.76000001 | -0.82938E-02 | -0.35800E-02 |
| 240 | 4.78000001 | -0.82256E-02 | -0.34100E-02 |
| 241 | 4.80000001 | -0.81602E-02 | -0.32700E-02 |
| 242 | 4.82000001 | -0.80960E-02 | -0.32100E-02 |
| 243 | 4.84000001 | -0.80334E-02 | -0.31300E-02 |
| 244 | 4.86000001 | -0.79744E-02 | -0.29500E-02 |
| 245 | 4.88000001 | -0.79198E-02 | -0.27300E-02 |
| 246 | 4.90000001 | -0.78652E-02 | -0.27300E-02 |
| 247 | 4.92000001 | -0.78106E-02 | -0.27300E-02 |
| 248 | 4.94000001 | -0.77560E-02 | -0.27300E-02 |
| 249 | 4.96000001 | -0.77016E-02 | -0.27200E-02 |
| 250 | 4.98000001 | -0.76474E-02 | -0.27100E-02 |
| 251 | 5.00000001 | -0.75952E-02 | -0.26100E-02 |
| 252 | 5.02000001 | -0.75450E-02 | -0.25100E-02 |
| 253 | 5.04000001 | -0.74966E-02 | -0.24200E-02 |
| 254 | 5.06000001 | -0.74500E-02 | -0.23300E-02 |
| 255 | 5.08000001 | -0.74070E-02 | -0.21500E-02 |
| 256 | 5.10000001 | -0.73656E-02 | -0.20700E-02 |
| 257 | 5.12000001 | -0.73258E-02 | -0.19900E-02 |
| 258 | 5.14000001 | -0.72876E-02 | -0.19100E-02 |
| 259 | 5.16000001 | -0.72512E-02 | -0.18200E-02 |

|     |            |              |              |
|-----|------------|--------------|--------------|
| 260 | 5.18000001 | -0.72154E-02 | -0.17900E-02 |
| 261 | 5.20000001 | -0.71802E-02 | -0.17600E-02 |
| 262 | 5.22000001 | -0.71458E-02 | -0.17200E-02 |
| 263 | 5.24000001 | -0.71126E-02 | -0.16600E-02 |
| 264 | 5.26000001 | -0.70822E-02 | -0.15200E-02 |
| 265 | 5.28000001 | -0.70560E-02 | -0.13100E-02 |
| 266 | 5.30000001 | -0.70338E-02 | -0.11100E-02 |
| 267 | 5.32000001 | -0.70118E-02 | -0.11000E-02 |
| 268 | 5.34000001 | -0.69900E-02 | -0.10900E-02 |
| 269 | 5.36000001 | -0.69684E-02 | -0.10800E-02 |
| 270 | 5.38000001 | -0.69470E-02 | -0.10700E-02 |
| 271 | 5.40000001 | -0.69258E-02 | -0.10600E-02 |
| 272 | 5.42000001 | -0.69048E-02 | -0.10500E-02 |
| 273 | 5.44000001 | -0.68840E-02 | -0.10400E-02 |
| 274 | 5.46000001 | -0.68638E-02 | -0.10100E-02 |
| 275 | 5.48000001 | -0.68452E-02 | -0.93000E-03 |
| 276 | 5.50000001 | -0.68279E-02 | -0.86500E-03 |
| 277 | 5.52000001 | -0.68119E-02 | -0.80000E-03 |
| 278 | 5.54000001 | -0.67964E-02 | -0.77200E-03 |
| 279 | 5.56000001 | -0.67817E-02 | -0.73800E-03 |
| 280 | 5.58000001 | -0.67672E-02 | -0.72400E-03 |
| 281 | 5.60000001 | -0.67529E-02 | -0.71400E-03 |
| 282 | 5.62000001 | -0.67387E-02 | -0.71300E-03 |
| 283 | 5.64000001 | -0.67244E-02 | -0.71200E-03 |
| 284 | 5.66000001 | -0.67102E-02 | -0.71100E-03 |
| 285 | 5.68000001 | -0.66960E-02 | -0.71000E-03 |
| 286 | 5.70000001 | -0.66818E-02 | -0.70900E-03 |
| 287 | 5.72000001 | -0.66677E-02 | -0.70800E-03 |
| 288 | 5.74000001 | -0.66535E-02 | -0.70700E-03 |
| 289 | 5.76000001 | -0.66394E-02 | -0.70600E-03 |
| 290 | 5.78000001 | -0.66253E-02 | -0.70500E-03 |
| 291 | 5.80000001 | -0.66112E-02 | -0.70400E-03 |
| 292 | 5.82000001 | -0.65972E-02 | -0.70300E-03 |
| 293 | 5.84000001 | -0.65831E-02 | -0.70200E-03 |
| 294 | 5.86000001 | -0.65691E-02 | -0.70100E-03 |
| 295 | 5.88000001 | -0.65551E-02 | -0.70000E-03 |
| 296 | 5.90000001 | -0.65411E-02 | -0.69900E-03 |
| 297 | 5.92000001 | -0.65272E-02 | -0.69800E-03 |
| 298 | 5.94000001 | -0.65132E-02 | -0.69700E-03 |
| 299 | 5.96000001 | -0.64993E-02 | -0.69600E-03 |
| 300 | 5.98000001 | -0.64854E-02 | -0.69500E-03 |
| 301 | 6.00000001 | -0.64715E-02 | -0.69400E-03 |
| 302 | 6.02000001 | -0.64577E-02 | -0.69300E-03 |
| 303 | 6.04000001 | -0.64438E-02 | -0.69200E-03 |
| 304 | 6.06000001 | -0.64300E-02 | -0.69100E-03 |
| 305 | 6.08000001 | -0.64162E-02 | -0.69000E-03 |
| 306 | 6.10000001 | -0.64024E-02 | -0.69000E-03 |
| 307 | 6.12000001 | -0.63886E-02 | -0.68900E-03 |
| 308 | 6.14000001 | -0.63749E-02 | -0.68800E-03 |
| 309 | 6.16000001 | -0.63611E-02 | -0.68700E-03 |
| 310 | 6.18000001 | -0.63474E-02 | -0.68600E-03 |
| 311 | 6.20000001 | -0.63337E-02 | -0.68500E-03 |
| 312 | 6.22000001 | -0.63200E-02 | -0.68400E-03 |
| 313 | 6.24000001 | -0.63064E-02 | -0.68300E-03 |
| 314 | 6.26000001 | -0.62927E-02 | -0.68200E-03 |
| 315 | 6.28000001 | -0.62791E-02 | -0.68100E-03 |
| 316 | 6.30000001 | -0.62655E-02 | -0.68000E-03 |
| 317 | 6.32000001 | -0.62519E-02 | -0.67900E-03 |
| 318 | 6.34000001 | -0.62383E-02 | -0.67900E-03 |
| 319 | 6.36000001 | -0.62248E-02 | -0.67800E-03 |
| 320 | 6.38000001 | -0.62112E-02 | -0.67700E-03 |
| 321 | 6.40000001 | -0.61977E-02 | -0.67600E-03 |
| 322 | 6.42000001 | -0.61842E-02 | -0.67500E-03 |
| 323 | 6.44000001 | -0.61707E-02 | -0.67400E-03 |
| 324 | 6.46000001 | -0.61573E-02 | -0.67200E-03 |
| 325 | 6.48000001 | -0.61440E-02 | -0.66700E-03 |

|     |           |              |              |
|-----|-----------|--------------|--------------|
| 326 | 6.5000001 | -0.61307E-02 | -0.66200E-03 |
| 327 | 6.5200001 | -0.61176E-02 | -0.65700E-03 |
| 328 | 6.5400001 | -0.61046E-02 | -0.64900E-03 |
| 329 | 6.5600001 | -0.60920E-02 | -0.62900E-03 |
| 330 | 6.5800001 | -0.60798E-02 | -0.60900E-03 |
| 331 | 6.6000001 | -0.60681E-02 | -0.58900E-03 |
| 332 | 6.6200001 | -0.60567E-02 | -0.56900E-03 |
| 333 | 6.6400001 | -0.60457E-02 | -0.54900E-03 |
| 334 | 6.6600001 | -0.60350E-02 | -0.53600E-03 |
| 335 | 6.6800001 | -0.60245E-02 | -0.52300E-03 |
| 336 | 6.7000001 | -0.60143E-02 | -0.51000E-03 |
| 337 | 6.7200001 | -0.60044E-02 | -0.49700E-03 |
| 338 | 6.7400001 | -0.59947E-02 | -0.48400E-03 |
| 339 | 6.7600001 | -0.59853E-02 | -0.47000E-03 |
| 340 | 6.7800001 | -0.59762E-02 | -0.45700E-03 |
| 341 | 6.8000001 | -0.59673E-02 | -0.44400E-03 |
| 342 | 6.8200001 | -0.59587E-02 | -0.43100E-03 |
| 343 | 6.8400001 | -0.59503E-02 | -0.41800E-03 |
| 344 | 6.8600001 | -0.59422E-02 | -0.40500E-03 |
| 345 | 6.8800001 | -0.59344E-02 | -0.39100E-03 |
| 346 | 6.9000001 | -0.59269E-02 | -0.37300E-03 |
| 347 | 6.9200001 | -0.59199E-02 | -0.34900E-03 |
| 348 | 6.9400001 | -0.59134E-02 | -0.32900E-03 |
| 349 | 6.9600001 | -0.59072E-02 | -0.30900E-03 |
| 350 | 6.9800001 | -0.59014E-02 | -0.29000E-03 |
| 351 | 7.0000001 | -0.58955E-02 | -0.29400E-03 |
| 352 | 7.0200001 | -0.58896E-02 | -0.29700E-03 |
| 353 | 7.0400001 | -0.58836E-02 | -0.29800E-03 |
| 354 | 7.0600001 | -0.58775E-02 | -0.30500E-03 |
| 355 | 7.0800001 | -0.58712E-02 | -0.31600E-03 |
| 356 | 7.1000001 | -0.58646E-02 | -0.33000E-03 |
| 357 | 7.1200001 | -0.58576E-02 | -0.35000E-03 |
| 358 | 7.1400001 | -0.58500E-02 | -0.38000E-03 |
| 359 | 7.1600001 | -0.58420E-02 | -0.40000E-03 |
| 360 | 7.1800001 | -0.58334E-02 | -0.43100E-03 |
| 361 | 7.2000001 | -0.58240E-02 | -0.46600E-03 |
| 362 | 7.2200001 | -0.58139E-02 | -0.50500E-03 |
| 363 | 7.2400001 | -0.58030E-02 | -0.54800E-03 |
| 364 | 7.2600001 | -0.57911E-02 | -0.59400E-03 |
| 365 | 7.2800001 | -0.57782E-02 | -0.64400E-03 |
| 366 | 7.3000001 | -0.57643E-02 | -0.69800E-03 |
| 367 | 7.3200001 | -0.57501E-02 | -0.70600E-03 |
| 368 | 7.3400001 | -0.57359E-02 | -0.71400E-03 |
| 369 | 7.3600001 | -0.57214E-02 | -0.72200E-03 |
| 370 | 7.3800001 | -0.57068E-02 | -0.73000E-03 |
| 371 | 7.4000001 | -0.56921E-02 | -0.73800E-03 |
| 372 | 7.4200001 | -0.56771E-02 | -0.74600E-03 |
| 373 | 7.4400001 | -0.56621E-02 | -0.75400E-03 |
| 374 | 7.4600001 | -0.56469E-02 | -0.75600E-03 |
| 375 | 7.4800001 | -0.56317E-02 | -0.76100E-03 |
| 376 | 7.5000001 | -0.56164E-02 | -0.76700E-03 |
| 377 | 7.5200001 | -0.56009E-02 | -0.77200E-03 |
| 378 | 7.5400001 | -0.55854E-02 | -0.77700E-03 |
| 379 | 7.5600001 | -0.55697E-02 | -0.78300E-03 |
| 380 | 7.5800001 | -0.55540E-02 | -0.78800E-03 |
| 381 | 7.6000001 | -0.55381E-02 | -0.79400E-03 |
| 382 | 7.6200001 | -0.55221E-02 | -0.79900E-03 |
| 383 | 7.6400001 | -0.55060E-02 | -0.80400E-03 |
| 384 | 7.6600001 | -0.54898E-02 | -0.81000E-03 |
| 385 | 7.6800001 | -0.54735E-02 | -0.81500E-03 |
| 386 | 7.7000001 | -0.54571E-02 | -0.82000E-03 |
| 387 | 7.7200001 | -0.54406E-02 | -0.82600E-03 |
| 388 | 7.7400001 | -0.54240E-02 | -0.83100E-03 |
| 389 | 7.7600001 | -0.54073E-02 | -0.83700E-03 |
| 390 | 7.7800001 | -0.53904E-02 | -0.84200E-03 |
| 391 | 7.8000001 | -0.53735E-02 | -0.84700E-03 |

|     |           |              |              |
|-----|-----------|--------------|--------------|
| 392 | 7.8200001 | -0.53564E-02 | -0.85300E-03 |
| 393 | 7.8400001 | -0.53393E-02 | -0.85800E-03 |
| 394 | 7.8600001 | -0.53220E-02 | -0.86300E-03 |
| 395 | 7.8800001 | -0.53046E-02 | -0.86900E-03 |
| 396 | 7.9000001 | -0.52871E-02 | -0.87400E-03 |
| 397 | 7.9200001 | -0.52695E-02 | -0.88000E-03 |
| 398 | 7.9400001 | -0.52518E-02 | -0.88500E-03 |
| 399 | 7.9600001 | -0.52340E-02 | -0.89000E-03 |
| 400 | 7.9800001 | -0.52161E-02 | -0.89600E-03 |
| 401 | 8.0000001 | -0.51981E-02 | -0.90100E-03 |
| 402 | 8.0200001 | -0.51800E-02 | -0.90600E-03 |
| 403 | 8.0400001 | -0.51617E-02 | -0.91200E-03 |
| 404 | 8.0600001 | -0.51434E-02 | -0.91700E-03 |
| 405 | 8.0800001 | -0.51250E-02 | -0.92200E-03 |
| 406 | 8.1000001 | -0.51064E-02 | -0.92800E-03 |
| 407 | 8.1200001 | -0.50877E-02 | -0.93300E-03 |
| 408 | 8.1400001 | -0.50690E-02 | -0.93900E-03 |
| 409 | 8.1600001 | -0.50501E-02 | -0.94400E-03 |
| 410 | 8.1800001 | -0.50311E-02 | -0.94900E-03 |
| 411 | 8.2000001 | -0.50120E-02 | -0.95500E-03 |
| 412 | 8.2200001 | -0.49928E-02 | -0.96000E-03 |
| 413 | 8.2400001 | -0.49735E-02 | -0.96500E-03 |
| 414 | 8.2600001 | -0.49541E-02 | -0.97100E-03 |
| 415 | 8.2800001 | -0.49346E-02 | -0.97600E-03 |
| 416 | 8.3000001 | -0.49149E-02 | -0.98200E-03 |
| 417 | 8.3200001 | -0.48952E-02 | -0.98700E-03 |
| 418 | 8.3400001 | -0.48753E-02 | -0.99200E-03 |
| 419 | 8.3600001 | -0.48554E-02 | -0.99800E-03 |
| 420 | 8.3800001 | -0.48354E-02 | -0.10000E-02 |
| 421 | 8.4000001 | -0.48152E-02 | -0.10100E-02 |
| 422 | 8.4200001 | -0.47950E-02 | -0.10100E-02 |
| 423 | 8.4400001 | -0.47746E-02 | -0.10200E-02 |
| 424 | 8.4600001 | -0.47542E-02 | -0.10200E-02 |
| 425 | 8.4800001 | -0.47336E-02 | -0.10300E-02 |
| 426 | 8.5000001 | -0.47128E-02 | -0.10400E-02 |
| 427 | 8.5200001 | -0.46920E-02 | -0.10400E-02 |
| 428 | 8.5400001 | -0.46710E-02 | -0.10500E-02 |
| 429 | 8.5600001 | -0.46500E-02 | -0.10500E-02 |
| 430 | 8.5800001 | -0.46288E-02 | -0.10600E-02 |
| 431 | 8.6000001 | -0.46076E-02 | -0.10600E-02 |
| 432 | 8.6200001 | -0.45862E-02 | -0.10700E-02 |
| 433 | 8.6400001 | -0.45648E-02 | -0.10700E-02 |
| 434 | 8.6600001 | -0.45432E-02 | -0.10800E-02 |
| 435 | 8.6800001 | -0.45216E-02 | -0.10800E-02 |
| 436 | 8.7000001 | -0.44998E-02 | -0.10900E-02 |
| 437 | 8.7200001 | -0.44780E-02 | -0.10900E-02 |
| 438 | 8.7400001 | -0.44560E-02 | -0.11000E-02 |
| 439 | 8.7600001 | -0.44338E-02 | -0.11100E-02 |
| 440 | 8.7800001 | -0.44116E-02 | -0.11100E-02 |
| 441 | 8.8000001 | -0.43892E-02 | -0.11200E-02 |
| 442 | 8.8200001 | -0.43668E-02 | -0.11200E-02 |
| 443 | 8.8400001 | -0.43442E-02 | -0.11300E-02 |
| 444 | 8.8600001 | -0.43216E-02 | -0.11300E-02 |
| 445 | 8.8800001 | -0.42988E-02 | -0.11400E-02 |
| 446 | 8.9000001 | -0.42760E-02 | -0.11400E-02 |
| 447 | 8.9200001 | -0.42530E-02 | -0.11500E-02 |
| 448 | 8.9400001 | -0.42300E-02 | -0.11500E-02 |
| 449 | 8.9600001 | -0.42068E-02 | -0.11600E-02 |
| 450 | 8.9800001 | -0.41836E-02 | -0.11600E-02 |
| 451 | 9.0000001 | -0.41602E-02 | -0.11700E-02 |
| 452 | 9.0200001 | -0.41368E-02 | -0.11700E-02 |
| 453 | 9.0400001 | -0.41132E-02 | -0.11800E-02 |
| 454 | 9.0600001 | -0.40894E-02 | -0.11900E-02 |
| 455 | 9.0800001 | -0.40656E-02 | -0.11900E-02 |
| 456 | 9.1000001 | -0.40416E-02 | -0.12000E-02 |
| 457 | 9.1200001 | -0.40176E-02 | -0.12000E-02 |

|     |             |              |              |
|-----|-------------|--------------|--------------|
| 458 | 9.14000001  | -0.39934E-02 | -0.12100E-02 |
| 459 | 9.16000001  | -0.39692E-02 | -0.12100E-02 |
| 460 | 9.18000001  | -0.39448E-02 | -0.12200E-02 |
| 461 | 9.20000001  | -0.39204E-02 | -0.12200E-02 |
| 462 | 9.22000001  | -0.38958E-02 | -0.12300E-02 |
| 463 | 9.24000001  | -0.38712E-02 | -0.12300E-02 |
| 464 | 9.26000001  | -0.38464E-02 | -0.12400E-02 |
| 465 | 9.28000001  | -0.38216E-02 | -0.12400E-02 |
| 466 | 9.30000001  | -0.37966E-02 | -0.12500E-02 |
| 467 | 9.32000001  | -0.37714E-02 | -0.12600E-02 |
| 468 | 9.34000001  | -0.37462E-02 | -0.12600E-02 |
| 469 | 9.36000001  | -0.37208E-02 | -0.12700E-02 |
| 470 | 9.38000001  | -0.36954E-02 | -0.12700E-02 |
| 471 | 9.40000001  | -0.36698E-02 | -0.12800E-02 |
| 472 | 9.42000001  | -0.36442E-02 | -0.12800E-02 |
| 473 | 9.44000001  | -0.36184E-02 | -0.12900E-02 |
| 474 | 9.46000001  | -0.35926E-02 | -0.12900E-02 |
| 475 | 9.48000001  | -0.35666E-02 | -0.13000E-02 |
| 476 | 9.50000001  | -0.35406E-02 | -0.13000E-02 |
| 477 | 9.52000001  | -0.35144E-02 | -0.13100E-02 |
| 478 | 9.54000001  | -0.34882E-02 | -0.13100E-02 |
| 479 | 9.56000001  | -0.34618E-02 | -0.13200E-02 |
| 480 | 9.58000001  | -0.34352E-02 | -0.13300E-02 |
| 481 | 9.60000001  | -0.34086E-02 | -0.13300E-02 |
| 482 | 9.62000001  | -0.33818E-02 | -0.13400E-02 |
| 483 | 9.64000001  | -0.33550E-02 | -0.13400E-02 |
| 484 | 9.66000001  | -0.33280E-02 | -0.13500E-02 |
| 485 | 9.68000001  | -0.33010E-02 | -0.13500E-02 |
| 486 | 9.70000001  | -0.32738E-02 | -0.13600E-02 |
| 487 | 9.72000001  | -0.32466E-02 | -0.13600E-02 |
| 488 | 9.74000001  | -0.32192E-02 | -0.13700E-02 |
| 489 | 9.76000001  | -0.31918E-02 | -0.13700E-02 |
| 490 | 9.78000001  | -0.31642E-02 | -0.13800E-02 |
| 491 | 9.80000001  | -0.31366E-02 | -0.13800E-02 |
| 492 | 9.82000001  | -0.31088E-02 | -0.13900E-02 |
| 493 | 9.84000001  | -0.30808E-02 | -0.14000E-02 |
| 494 | 9.86000001  | -0.30528E-02 | -0.14000E-02 |
| 495 | 9.88000001  | -0.30246E-02 | -0.14100E-02 |
| 496 | 9.90000001  | -0.29964E-02 | -0.14100E-02 |
| 497 | 9.92000001  | -0.29680E-02 | -0.14200E-02 |
| 498 | 9.94000001  | -0.29396E-02 | -0.14200E-02 |
| 499 | 9.96000001  | -0.29110E-02 | -0.14300E-02 |
| 500 | 9.98000001  | -0.28824E-02 | -0.14300E-02 |
| 501 | 10.00000001 | -0.28536E-02 | -0.14400E-02 |
| 502 | 10.02000001 | -0.28248E-02 | -0.14400E-02 |
| 503 | 10.04000001 | -0.27958E-02 | -0.14500E-02 |
| 504 | 10.06000001 | -0.27668E-02 | -0.14500E-02 |
| 505 | 10.08000001 | -0.27376E-02 | -0.14600E-02 |
| 506 | 10.10000001 | -0.27084E-02 | -0.14600E-02 |
| 507 | 10.12000001 | -0.26790E-02 | -0.14700E-02 |
| 508 | 10.14000001 | -0.26494E-02 | -0.14800E-02 |
| 509 | 10.16000001 | -0.26198E-02 | -0.14800E-02 |
| 510 | 10.18000001 | -0.25900E-02 | -0.14900E-02 |
| 511 | 10.20000001 | -0.25602E-02 | -0.14900E-02 |
| 512 | 10.22000001 | -0.25302E-02 | -0.15000E-02 |
| 513 | 10.24000001 | -0.25002E-02 | -0.15000E-02 |
| 514 | 10.26000001 | -0.24700E-02 | -0.15100E-02 |
| 515 | 10.28000001 | -0.24398E-02 | -0.15100E-02 |
| 516 | 10.30000001 | -0.24094E-02 | -0.15200E-02 |
| 517 | 10.32000001 | -0.23790E-02 | -0.15200E-02 |
| 518 | 10.34000001 | -0.23484E-02 | -0.15300E-02 |
| 519 | 10.36000001 | -0.23178E-02 | -0.15300E-02 |
| 520 | 10.38000001 | -0.22870E-02 | -0.15400E-02 |
| 521 | 10.40000001 | -0.22560E-02 | -0.15500E-02 |
| 522 | 10.42000001 | -0.22250E-02 | -0.15500E-02 |
| 523 | 10.44000001 | -0.21938E-02 | -0.15600E-02 |



|     |            |              |              |
|-----|------------|--------------|--------------|
| 524 | 10.4600001 | -0.21626E-02 | -0.15600E-02 |
| 525 | 10.4800001 | -0.21312E-02 | -0.15700E-02 |
| 526 | 10.5000001 | -0.20998E-02 | -0.15700E-02 |
| 527 | 10.5200001 | -0.20682E-02 | -0.15800E-02 |
| 528 | 10.5400001 | -0.20366E-02 | -0.15800E-02 |
| 529 | 10.5600001 | -0.20048E-02 | -0.15900E-02 |
| 530 | 10.5800001 | -0.19730E-02 | -0.15900E-02 |
| 531 | 10.6000001 | -0.19410E-02 | -0.16000E-02 |
| 532 | 10.6200001 | -0.19090E-02 | -0.16000E-02 |
| 533 | 10.6400001 | -0.18768E-02 | -0.16100E-02 |
| 534 | 10.6600001 | -0.18444E-02 | -0.16200E-02 |
| 535 | 10.6800001 | -0.18120E-02 | -0.16200E-02 |
| 536 | 10.7000001 | -0.17794E-02 | -0.16300E-02 |
| 537 | 10.7200001 | -0.17468E-02 | -0.16300E-02 |
| 538 | 10.7400001 | -0.17140E-02 | -0.16400E-02 |
| 539 | 10.7600001 | -0.16812E-02 | -0.16400E-02 |
| 540 | 10.7800001 | -0.16482E-02 | -0.16500E-02 |
| 541 | 10.8000001 | -0.16152E-02 | -0.16500E-02 |
| 542 | 10.8200001 | -0.15820E-02 | -0.16600E-02 |
| 543 | 10.8400001 | -0.15488E-02 | -0.16600E-02 |
| 544 | 10.8600001 | -0.15154E-02 | -0.16700E-02 |
| 545 | 10.8800001 | -0.14820E-02 | -0.16700E-02 |
| 546 | 10.9000001 | -0.14484E-02 | -0.16800E-02 |
| 547 | 10.9200001 | -0.14146E-02 | -0.16900E-02 |
| 548 | 10.9400001 | -0.13808E-02 | -0.16900E-02 |
| 549 | 10.9600001 | -0.13468E-02 | -0.17000E-02 |
| 550 | 10.9800001 | -0.13128E-02 | -0.17000E-02 |
| 551 | 11.0000001 | -0.12786E-02 | -0.17100E-02 |
| 552 | 11.0200001 | -0.12444E-02 | -0.17100E-02 |
| 553 | 11.0400001 | -0.12100E-02 | -0.17200E-02 |
| 554 | 11.0600001 | -0.11756E-02 | -0.17200E-02 |
| 555 | 11.0800001 | -0.11410E-02 | -0.17300E-02 |
| 556 | 11.1000001 | -0.11064E-02 | -0.17300E-02 |
| 557 | 11.1200001 | -0.10716E-02 | -0.17400E-02 |
| 558 | 11.1400001 | -0.10368E-02 | -0.17400E-02 |
| 559 | 11.1600001 | -0.10018E-02 | -0.17500E-02 |
| 560 | 11.1800001 | -0.96658E-03 | -0.17600E-02 |
| 561 | 11.2000001 | -0.93138E-03 | -0.17600E-02 |
| 562 | 11.2200001 | -0.89598E-03 | -0.17700E-02 |
| 563 | 11.2400001 | -0.86058E-03 | -0.17700E-02 |
| 564 | 11.2600001 | -0.82498E-03 | -0.17800E-02 |
| 565 | 11.2800001 | -0.78918E-03 | -0.17900E-02 |
| 566 | 11.3000001 | -0.75358E-03 | -0.17800E-02 |
| 567 | 11.3200001 | -0.71798E-03 | -0.17800E-02 |
| 568 | 11.3400001 | -0.68258E-03 | -0.17700E-02 |
| 569 | 11.3600001 | -0.64718E-03 | -0.17700E-02 |
| 570 | 11.3800001 | -0.61198E-03 | -0.17600E-02 |
| 571 | 11.4000001 | -0.57678E-03 | -0.17600E-02 |
| 572 | 11.4200001 | -0.54178E-03 | -0.17500E-02 |
| 573 | 11.4400001 | -0.50678E-03 | -0.17500E-02 |
| 574 | 11.4600001 | -0.47198E-03 | -0.17400E-02 |
| 575 | 11.4800001 | -0.43718E-03 | -0.17400E-02 |
| 576 | 11.5000001 | -0.40258E-03 | -0.17300E-02 |
| 577 | 11.5200001 | -0.36798E-03 | -0.17300E-02 |
| 578 | 11.5400001 | -0.33338E-03 | -0.17300E-02 |
| 579 | 11.5600001 | -0.29898E-03 | -0.17200E-02 |
| 580 | 11.5800001 | -0.26458E-03 | -0.17200E-02 |
| 581 | 11.6000001 | -0.23018E-03 | -0.17200E-02 |
| 582 | 11.6200001 | -0.19578E-03 | -0.17200E-02 |
| 583 | 11.6400001 | -0.16138E-03 | -0.17200E-02 |
| 584 | 11.6600001 | -0.12698E-03 | -0.17200E-02 |
| 585 | 11.6800001 | -0.92583E-04 | -0.17200E-02 |
| 586 | 11.7000001 | -0.58183E-04 | -0.17200E-02 |
| 587 | 11.7200001 | -0.23783E-04 | -0.17200E-02 |
| 588 | 11.7400001 | -0.23783E-04 | 0.00000E+00  |
| 589 | 11.7600001 | -0.23783E-04 | 0.00000E+00  |

|     |            |              |              |
|-----|------------|--------------|--------------|
| 590 | 11.7800001 | 0.000000E+00 | 0.000000E+00 |
| 591 | 11.8000001 | 0.000000E+00 | 0.000000E+00 |
| 592 | 11.8200001 | 0.000000E+00 | 0.000000E+00 |
| 593 | 11.8400001 | 0.000000E+00 | 0.000000E+00 |
| 594 | 11.8600001 | 0.000000E+00 | 0.000000E+00 |
| 595 | 11.8800001 | 0.000000E+00 | 0.000000E+00 |
| 596 | 11.9000001 | 0.000000E+00 | 0.000000E+00 |
| 597 | 11.9200001 | 0.000000E+00 | 0.000000E+00 |
| 598 | 11.9400001 | 0.000000E+00 | 0.000000E+00 |
| 599 | 11.9600001 | 0.000000E+00 | 0.000000E+00 |
| 600 | 11.9800001 | 0.000000E+00 | 0.000000E+00 |
