# Supplementary material
Source: MDPI journal article supplement (https://www.mdpi.com/2226-4310/5/1/1)
Supplement: s1 [file s1]

# Tabulated potential for E1-E2

E1-E2

N 600 R 0.0000001 11.9800001

|    |           |             |             |
|----|-----------|-------------|-------------|
| 1  | 0.0000001 | 0.16491E+06 | 0.12700E+06 |
| 2  | 0.0200001 | 0.16239E+06 | 0.12600E+06 |
| 3  | 0.0400001 | 0.15989E+06 | 0.12500E+06 |
| 4  | 0.0600001 | 0.15741E+06 | 0.12400E+06 |
| 5  | 0.0800001 | 0.15495E+06 | 0.12300E+06 |
| 6  | 0.1000001 | 0.15251E+06 | 0.12200E+06 |
| 7  | 0.1200001 | 0.15009E+06 | 0.12100E+06 |
| 8  | 0.1400001 | 0.14769E+06 | 0.12000E+06 |
| 9  | 0.1600001 | 0.14531E+06 | 0.11900E+06 |
| 10 | 0.1800001 | 0.14295E+06 | 0.11800E+06 |
| 11 | 0.2000001 | 0.14061E+06 | 0.11700E+06 |
| 12 | 0.2200001 | 0.13829E+06 | 0.11600E+06 |
| 13 | 0.2400001 | 0.13599E+06 | 0.11500E+06 |
| 14 | 0.2600001 | 0.13371E+06 | 0.11400E+06 |
| 15 | 0.2800001 | 0.13145E+06 | 0.11300E+06 |
| 16 | 0.3000001 | 0.12919E+06 | 0.11300E+06 |
| 17 | 0.3200001 | 0.12695E+06 | 0.11200E+06 |
| 18 | 0.3400001 | 0.12473E+06 | 0.11100E+06 |
| 19 | 0.3600001 | 0.12253E+06 | 0.11000E+06 |
| 20 | 0.3800001 | 0.12035E+06 | 0.10900E+06 |
| 21 | 0.4000001 | 0.11819E+06 | 0.10800E+06 |
| 22 | 0.4200001 | 0.11605E+06 | 0.10700E+06 |
| 23 | 0.4400001 | 0.11393E+06 | 0.10600E+06 |
| 24 | 0.4600001 | 0.11183E+06 | 0.10500E+06 |
| 25 | 0.4800001 | 0.10975E+06 | 0.10400E+06 |
| 26 | 0.5000001 | 0.10769E+06 | 0.10300E+06 |
| 27 | 0.5200001 | 0.10565E+06 | 0.10200E+06 |
| 28 | 0.5400001 | 0.10363E+06 | 0.10100E+06 |
| 29 | 0.5600001 | 0.10163E+06 | 0.99900E+05 |
| 30 | 0.5800001 | 0.99656E+05 | 0.98900E+05 |
| 31 | 0.6000001 | 0.97698E+05 | 0.97900E+05 |
| 32 | 0.6200001 | 0.95758E+05 | 0.97000E+05 |
| 33 | 0.6400001 | 0.93838E+05 | 0.96000E+05 |
| 34 | 0.6600001 | 0.91938E+05 | 0.95000E+05 |
| 35 | 0.6800001 | 0.90058E+05 | 0.94000E+05 |
| 36 | 0.7000001 | 0.88196E+05 | 0.93100E+05 |
| 37 | 0.7200001 | 0.86354E+05 | 0.92100E+05 |
| 38 | 0.7400001 | 0.84532E+05 | 0.91100E+05 |
| 39 | 0.7600001 | 0.82730E+05 | 0.90100E+05 |
| 40 | 0.7800001 | 0.80946E+05 | 0.89200E+05 |
| 41 | 0.8000001 | 0.79182E+05 | 0.88200E+05 |
| 42 | 0.8200001 | 0.77438E+05 | 0.87200E+05 |
| 43 | 0.8400001 | 0.75712E+05 | 0.86300E+05 |
| 44 | 0.8600001 | 0.74006E+05 | 0.85300E+05 |
| 45 | 0.8800001 | 0.72320E+05 | 0.84300E+05 |
| 46 | 0.9000001 | 0.70654E+05 | 0.83300E+05 |
| 47 | 0.9200001 | 0.69006E+05 | 0.82400E+05 |
| 48 | 0.9400001 | 0.67378E+05 | 0.81400E+05 |
| 49 | 0.9600001 | 0.65770E+05 | 0.80400E+05 |
| 50 | 0.9800001 | 0.64182E+05 | 0.79400E+05 |
| 51 | 1.0000001 | 0.62612E+05 | 0.78500E+05 |
| 52 | 1.0200001 | 0.61062E+05 | 0.77500E+05 |
| 53 | 1.0400001 | 0.59532E+05 | 0.76500E+05 |
| 54 | 1.0600001 | 0.58020E+05 | 0.75600E+05 |
| 55 | 1.0800001 | 0.56528E+05 | 0.74600E+05 |
| 56 | 1.1000001 | 0.55056E+05 | 0.73600E+05 |
| 57 | 1.1200001 | 0.53604E+05 | 0.72600E+05 |
| 58 | 1.1400001 | 0.52170E+05 | 0.71700E+05 |
| 59 | 1.1600001 | 0.50756E+05 | 0.70700E+05 |
| 60 | 1.1800001 | 0.49362E+05 | 0.69700E+05 |
| 61 | 1.2000001 | 0.47988E+05 | 0.68700E+05 |

|     |           |             |             |
|-----|-----------|-------------|-------------|
| 62  | 1.2200001 | 0.46632E+05 | 0.67800E+05 |
| 63  | 1.2400001 | 0.45296E+05 | 0.66800E+05 |
| 64  | 1.2600001 | 0.43980E+05 | 0.65800E+05 |
| 65  | 1.2800001 | 0.42684E+05 | 0.64800E+05 |
| 66  | 1.3000001 | 0.41406E+05 | 0.63900E+05 |
| 67  | 1.3200001 | 0.40148E+05 | 0.62900E+05 |
| 68  | 1.3400001 | 0.38910E+05 | 0.61900E+05 |
| 69  | 1.3600001 | 0.37690E+05 | 0.61000E+05 |
| 70  | 1.3800001 | 0.36490E+05 | 0.60000E+05 |
| 71  | 1.4000001 | 0.35310E+05 | 0.59000E+05 |
| 72  | 1.4200001 | 0.34150E+05 | 0.58000E+05 |
| 73  | 1.4400001 | 0.33008E+05 | 0.57100E+05 |
| 74  | 1.4600001 | 0.31886E+05 | 0.56100E+05 |
| 75  | 1.4800001 | 0.30784E+05 | 0.55100E+05 |
| 76  | 1.5000001 | 0.29702E+05 | 0.54100E+05 |
| 77  | 1.5200001 | 0.28638E+05 | 0.53200E+05 |
| 78  | 1.5400001 | 0.27594E+05 | 0.52200E+05 |
| 79  | 1.5600001 | 0.26570E+05 | 0.51200E+05 |
| 80  | 1.5800001 | 0.25564E+05 | 0.50300E+05 |
| 81  | 1.6000001 | 0.24578E+05 | 0.49300E+05 |
| 82  | 1.6200001 | 0.23612E+05 | 0.48300E+05 |
| 83  | 1.6400001 | 0.22666E+05 | 0.47300E+05 |
| 84  | 1.6600001 | 0.21738E+05 | 0.46400E+05 |
| 85  | 1.6800001 | 0.20830E+05 | 0.45400E+05 |
| 86  | 1.7000001 | 0.19942E+05 | 0.44400E+05 |
| 87  | 1.7200001 | 0.19074E+05 | 0.43400E+05 |
| 88  | 1.7400001 | 0.18224E+05 | 0.42500E+05 |
| 89  | 1.7600001 | 0.17394E+05 | 0.41500E+05 |
| 90  | 1.7800001 | 0.16584E+05 | 0.40500E+05 |
| 91  | 1.8000001 | 0.15794E+05 | 0.39500E+05 |
| 92  | 1.8200001 | 0.15022E+05 | 0.38600E+05 |
| 93  | 1.8400001 | 0.14270E+05 | 0.37600E+05 |
| 94  | 1.8600001 | 0.13538E+05 | 0.36600E+05 |
| 95  | 1.8800001 | 0.12824E+05 | 0.35700E+05 |
| 96  | 1.9000001 | 0.12130E+05 | 0.34700E+05 |
| 97  | 1.9200001 | 0.11456E+05 | 0.33700E+05 |
| 98  | 1.9400001 | 0.10802E+05 | 0.32700E+05 |
| 99  | 1.9600001 | 0.10166E+05 | 0.31800E+05 |
| 100 | 1.9800001 | 0.95497E+04 | 0.30800E+05 |
| 101 | 2.0000001 | 0.89537E+04 | 0.29800E+05 |
| 102 | 2.0200001 | 0.83777E+04 | 0.28800E+05 |
| 103 | 2.0400001 | 0.78197E+04 | 0.27900E+05 |
| 104 | 2.0600001 | 0.72817E+04 | 0.26900E+05 |
| 105 | 2.0800001 | 0.67637E+04 | 0.25900E+05 |
| 106 | 2.1000001 | 0.62637E+04 | 0.25000E+05 |
| 107 | 2.1200001 | 0.57837E+04 | 0.24000E+05 |
| 108 | 2.1400001 | 0.53237E+04 | 0.23000E+05 |
| 109 | 2.1600001 | 0.48837E+04 | 0.22000E+05 |
| 110 | 2.1800001 | 0.44617E+04 | 0.21100E+05 |
| 111 | 2.2000001 | 0.40597E+04 | 0.20100E+05 |
| 112 | 2.2200001 | 0.36777E+04 | 0.19100E+05 |
| 113 | 2.2400001 | 0.33157E+04 | 0.18100E+05 |
| 114 | 2.2600001 | 0.29717E+04 | 0.17200E+05 |
| 115 | 2.2800001 | 0.26477E+04 | 0.16200E+05 |
| 116 | 2.3000001 | 0.23437E+04 | 0.15200E+05 |
| 117 | 2.3200001 | 0.20577E+04 | 0.14300E+05 |
| 118 | 2.3400001 | 0.17917E+04 | 0.13300E+05 |
| 119 | 2.3600001 | 0.15457E+04 | 0.12300E+05 |
| 120 | 2.3800001 | 0.13197E+04 | 0.11300E+05 |
| 121 | 2.4000001 | 0.11117E+04 | 0.10400E+05 |
| 122 | 2.4200001 | 0.92390E+03 | 0.93900E+04 |
| 123 | 2.4400001 | 0.75570E+03 | 0.84100E+04 |
| 124 | 2.4600001 | 0.60690E+03 | 0.74400E+04 |
| 125 | 2.4800001 | 0.47750E+03 | 0.64700E+04 |
| 126 | 2.5000001 | 0.36770E+03 | 0.54900E+04 |
| 127 | 2.5200001 | 0.27730E+03 | 0.45200E+04 |

|     |           |              |             |
|-----|-----------|--------------|-------------|
| 128 | 2.5400001 | 0.20630E+03  | 0.35500E+04 |
| 129 | 2.5600001 | 0.15470E+03  | 0.25800E+04 |
| 130 | 2.5800001 | 0.11690E+03  | 0.18900E+04 |
| 131 | 2.6000001 | 0.89100E+02  | 0.13900E+04 |
| 132 | 2.6200001 | 0.68300E+02  | 0.10400E+04 |
| 133 | 2.6400001 | 0.52740E+02  | 0.77800E+03 |
| 134 | 2.6600001 | 0.41000E+02  | 0.58700E+03 |
| 135 | 2.6800001 | 0.32060E+02  | 0.44700E+03 |
| 136 | 2.7000001 | 0.25220E+02  | 0.34200E+03 |
| 137 | 2.7200001 | 0.19940E+02  | 0.26400E+03 |
| 138 | 2.7400001 | 0.15860E+02  | 0.20400E+03 |
| 139 | 2.7600001 | 0.12680E+02  | 0.15900E+03 |
| 140 | 2.7800001 | 0.10180E+02  | 0.12500E+03 |
| 141 | 2.8000001 | 0.82118E+01  | 0.98400E+02 |
| 142 | 2.8200001 | 0.66538E+01  | 0.77900E+02 |
| 143 | 2.8400001 | 0.54138E+01  | 0.62000E+02 |
| 144 | 2.8600001 | 0.44218E+01  | 0.49600E+02 |
| 145 | 2.8800001 | 0.36258E+01  | 0.39800E+02 |
| 146 | 2.9000001 | 0.29838E+01  | 0.32100E+02 |
| 147 | 2.9200001 | 0.24638E+01  | 0.26000E+02 |
| 148 | 2.9400001 | 0.20418E+01  | 0.21100E+02 |
| 149 | 2.9600001 | 0.16958E+01  | 0.17300E+02 |
| 150 | 2.9800001 | 0.14138E+01  | 0.14100E+02 |
| 151 | 3.0000001 | 0.11818E+01  | 0.11600E+02 |
| 152 | 3.0200001 | 0.99005E+00  | 0.95900E+01 |
| 153 | 3.0400001 | 0.83125E+00  | 0.79400E+01 |
| 154 | 3.0600001 | 0.69925E+00  | 0.66000E+01 |
| 155 | 3.0800001 | 0.58945E+00  | 0.54900E+01 |
| 156 | 3.1000001 | 0.49765E+00  | 0.45900E+01 |
| 157 | 3.1200001 | 0.42065E+00  | 0.38500E+01 |
| 158 | 3.1400001 | 0.35605E+00  | 0.32300E+01 |
| 159 | 3.1600001 | 0.30165E+00  | 0.27200E+01 |
| 160 | 3.1800001 | 0.25565E+00  | 0.23000E+01 |
| 161 | 3.2000001 | 0.21685E+00  | 0.19400E+01 |
| 162 | 3.2200001 | 0.18385E+00  | 0.16500E+01 |
| 163 | 3.2400001 | 0.15585E+00  | 0.14000E+01 |
| 164 | 3.2600001 | 0.13205E+00  | 0.11900E+01 |
| 165 | 3.2800001 | 0.11165E+00  | 0.10200E+01 |
| 166 | 3.3000001 | 0.94249E-01  | 0.87000E+00 |
| 167 | 3.3200001 | 0.79349E-01  | 0.74500E+00 |
| 168 | 3.3400001 | 0.66589E-01  | 0.63800E+00 |
| 169 | 3.3600001 | 0.55629E-01  | 0.54800E+00 |
| 170 | 3.3800001 | 0.46209E-01  | 0.47100E+00 |
| 171 | 3.4000001 | 0.38089E-01  | 0.40600E+00 |
| 172 | 3.4200001 | 0.31109E-01  | 0.34900E+00 |
| 173 | 3.4400001 | 0.25089E-01  | 0.30100E+00 |
| 174 | 3.4600001 | 0.19909E-01  | 0.25900E+00 |
| 175 | 3.4800001 | 0.15429E-01  | 0.22400E+00 |
| 176 | 3.5000001 | 0.11569E-01  | 0.19300E+00 |
| 177 | 3.5200001 | 0.82293E-02  | 0.16700E+00 |
| 178 | 3.5400001 | 0.53493E-02  | 0.14400E+00 |
| 179 | 3.5600001 | 0.28693E-02  | 0.12400E+00 |
| 180 | 3.5800001 | 0.72932E-03  | 0.10700E+00 |
| 181 | 3.6000001 | -0.11127E-02 | 0.92100E-01 |
| 182 | 3.6200001 | -0.26867E-02 | 0.78700E-01 |
| 183 | 3.6400001 | -0.40447E-02 | 0.67900E-01 |
| 184 | 3.6600001 | -0.52087E-02 | 0.58200E-01 |
| 185 | 3.6800001 | -0.61907E-02 | 0.49100E-01 |
| 186 | 3.7000001 | -0.70347E-02 | 0.42200E-01 |
| 187 | 3.7200001 | -0.77487E-02 | 0.35700E-01 |
| 188 | 3.7400001 | -0.83407E-02 | 0.29600E-01 |
| 189 | 3.7600001 | -0.88427E-02 | 0.25100E-01 |
| 190 | 3.7800001 | -0.92487E-02 | 0.20300E-01 |
| 191 | 3.8000001 | -0.95907E-02 | 0.17100E-01 |
| 192 | 3.8200001 | -0.98667E-02 | 0.13800E-01 |
| 193 | 3.8400001 | -0.10075E-01 | 0.10400E-01 |

|     |           |              |              |
|-----|-----------|--------------|--------------|
| 194 | 3.8600001 | -0.10242E-01 | 0.83900E-02  |
| 195 | 3.8800001 | -0.10367E-01 | 0.62100E-02  |
| 196 | 3.9000001 | -0.10443E-01 | 0.38100E-02  |
| 197 | 3.9200001 | -0.10496E-01 | 0.26500E-02  |
| 198 | 3.9400001 | -0.10520E-01 | 0.12100E-02  |
| 199 | 3.9600001 | -0.10509E-01 | -0.53600E-03 |
| 200 | 3.9800001 | -0.10486E-01 | -0.11700E-02 |
| 201 | 4.0000001 | -0.10445E-01 | -0.20500E-02 |
| 202 | 4.0200001 | -0.10388E-01 | -0.28600E-02 |
| 203 | 4.0400001 | -0.10307E-01 | -0.40500E-02 |
| 204 | 4.0600001 | -0.10224E-01 | -0.41400E-02 |
| 205 | 4.0800001 | -0.10131E-01 | -0.46400E-02 |
| 206 | 4.1000001 | -0.10027E-01 | -0.52300E-02 |
| 207 | 4.1200001 | -0.99172E-02 | -0.54700E-02 |
| 208 | 4.1400001 | -0.98030E-02 | -0.57100E-02 |
| 209 | 4.1600001 | -0.96840E-02 | -0.59500E-02 |
| 210 | 4.1800001 | -0.95602E-02 | -0.61900E-02 |
| 211 | 4.2000001 | -0.94342E-02 | -0.63000E-02 |
| 212 | 4.2200001 | -0.93058E-02 | -0.64200E-02 |
| 213 | 4.2400001 | -0.91658E-02 | -0.70000E-02 |
| 214 | 4.2600001 | -0.90254E-02 | -0.70200E-02 |
| 215 | 4.2800001 | -0.88844E-02 | -0.70500E-02 |
| 216 | 4.3000001 | -0.87430E-02 | -0.70700E-02 |
| 217 | 4.3200001 | -0.86012E-02 | -0.70900E-02 |
| 218 | 4.3400001 | -0.84604E-02 | -0.70400E-02 |
| 219 | 4.3600001 | -0.83204E-02 | -0.70000E-02 |
| 220 | 4.3800001 | -0.81812E-02 | -0.69600E-02 |
| 221 | 4.4000001 | -0.80428E-02 | -0.69200E-02 |
| 222 | 4.4200001 | -0.79052E-02 | -0.68800E-02 |
| 223 | 4.4400001 | -0.77686E-02 | -0.68300E-02 |
| 224 | 4.4600001 | -0.76348E-02 | -0.66900E-02 |
| 225 | 4.4800001 | -0.75028E-02 | -0.66000E-02 |
| 226 | 4.5000001 | -0.73728E-02 | -0.65000E-02 |
| 227 | 4.5200001 | -0.72448E-02 | -0.64000E-02 |
| 228 | 4.5400001 | -0.71188E-02 | -0.63000E-02 |
| 229 | 4.5600001 | -0.69948E-02 | -0.62000E-02 |
| 230 | 4.5800001 | -0.68728E-02 | -0.61000E-02 |
| 231 | 4.6000001 | -0.67528E-02 | -0.60000E-02 |
| 232 | 4.6200001 | -0.66352E-02 | -0.58800E-02 |
| 233 | 4.6400001 | -0.65186E-02 | -0.58300E-02 |
| 234 | 4.6600001 | -0.64044E-02 | -0.57100E-02 |
| 235 | 4.6800001 | -0.62928E-02 | -0.55800E-02 |
| 236 | 4.7000001 | -0.61838E-02 | -0.54500E-02 |
| 237 | 4.7200001 | -0.60772E-02 | -0.53300E-02 |
| 238 | 4.7400001 | -0.59732E-02 | -0.52000E-02 |
| 239 | 4.7600001 | -0.58706E-02 | -0.51300E-02 |
| 240 | 4.7800001 | -0.57718E-02 | -0.49400E-02 |
| 241 | 4.8000001 | -0.56744E-02 | -0.48700E-02 |
| 242 | 4.8200001 | -0.55784E-02 | -0.48000E-02 |
| 243 | 4.8400001 | -0.54838E-02 | -0.47300E-02 |
| 244 | 4.8600001 | -0.53906E-02 | -0.46600E-02 |
| 245 | 4.8800001 | -0.52988E-02 | -0.45900E-02 |
| 246 | 4.9000001 | -0.52084E-02 | -0.45200E-02 |
| 247 | 4.9200001 | -0.51214E-02 | -0.43500E-02 |
| 248 | 4.9400001 | -0.50366E-02 | -0.42400E-02 |
| 249 | 4.9600001 | -0.49534E-02 | -0.41600E-02 |
| 250 | 4.9800001 | -0.48718E-02 | -0.40800E-02 |
| 251 | 5.0000001 | -0.47936E-02 | -0.39100E-02 |
| 252 | 5.0200001 | -0.47168E-02 | -0.38400E-02 |
| 253 | 5.0400001 | -0.46414E-02 | -0.37700E-02 |
| 254 | 5.0600001 | -0.45674E-02 | -0.37000E-02 |
| 255 | 5.0800001 | -0.44948E-02 | -0.36300E-02 |
| 256 | 5.1000001 | -0.44236E-02 | -0.35600E-02 |
| 257 | 5.1200001 | -0.43530E-02 | -0.35300E-02 |
| 258 | 5.1400001 | -0.42832E-02 | -0.34900E-02 |
| 259 | 5.1600001 | -0.42152E-02 | -0.34000E-02 |

|     |            |              |              |
|-----|------------|--------------|--------------|
| 260 | 5.18000001 | -0.41490E-02 | -0.33100E-02 |
| 261 | 5.20000001 | -0.40858E-02 | -0.31600E-02 |
| 262 | 5.22000001 | -0.40236E-02 | -0.31100E-02 |
| 263 | 5.24000001 | -0.39626E-02 | -0.30500E-02 |
| 264 | 5.26000001 | -0.39028E-02 | -0.29900E-02 |
| 265 | 5.28000001 | -0.38448E-02 | -0.29000E-02 |
| 266 | 5.30000001 | -0.37876E-02 | -0.28600E-02 |
| 267 | 5.32000001 | -0.37312E-02 | -0.28200E-02 |
| 268 | 5.34000001 | -0.36758E-02 | -0.27700E-02 |
| 269 | 5.36000001 | -0.36212E-02 | -0.27300E-02 |
| 270 | 5.38000001 | -0.35678E-02 | -0.26700E-02 |
| 271 | 5.40000001 | -0.35156E-02 | -0.26100E-02 |
| 272 | 5.42000001 | -0.34644E-02 | -0.25600E-02 |
| 273 | 5.44000001 | -0.34146E-02 | -0.24900E-02 |
| 274 | 5.46000001 | -0.33658E-02 | -0.24400E-02 |
| 275 | 5.48000001 | -0.33174E-02 | -0.24200E-02 |
| 276 | 5.50000001 | -0.32698E-02 | -0.23800E-02 |
| 277 | 5.52000001 | -0.32230E-02 | -0.23400E-02 |
| 278 | 5.54000001 | -0.31770E-02 | -0.23000E-02 |
| 279 | 5.56000001 | -0.31318E-02 | -0.22600E-02 |
| 280 | 5.58000001 | -0.30872E-02 | -0.22300E-02 |
| 281 | 5.60000001 | -0.30434E-02 | -0.21900E-02 |
| 282 | 5.62000001 | -0.30006E-02 | -0.21400E-02 |
| 283 | 5.64000001 | -0.29586E-02 | -0.21000E-02 |
| 284 | 5.66000001 | -0.29174E-02 | -0.20600E-02 |
| 285 | 5.68000001 | -0.28770E-02 | -0.20200E-02 |
| 286 | 5.70000001 | -0.28374E-02 | -0.19800E-02 |
| 287 | 5.72000001 | -0.27984E-02 | -0.19500E-02 |
| 288 | 5.74000001 | -0.27610E-02 | -0.18700E-02 |
| 289 | 5.76000001 | -0.27242E-02 | -0.18400E-02 |
| 290 | 5.78000001 | -0.26880E-02 | -0.18100E-02 |
| 291 | 5.80000001 | -0.26526E-02 | -0.17700E-02 |
| 292 | 5.82000001 | -0.26182E-02 | -0.17200E-02 |
| 293 | 5.84000001 | -0.25842E-02 | -0.17000E-02 |
| 294 | 5.86000001 | -0.25506E-02 | -0.16800E-02 |
| 295 | 5.88000001 | -0.25174E-02 | -0.16600E-02 |
| 296 | 5.90000001 | -0.24850E-02 | -0.16200E-02 |
| 297 | 5.92000001 | -0.24532E-02 | -0.15900E-02 |
| 298 | 5.94000001 | -0.24222E-02 | -0.15500E-02 |
| 299 | 5.96000001 | -0.23916E-02 | -0.15300E-02 |
| 300 | 5.98000001 | -0.23614E-02 | -0.15100E-02 |
| 301 | 6.00000001 | -0.23314E-02 | -0.15000E-02 |
| 302 | 6.02000001 | -0.23020E-02 | -0.14700E-02 |
| 303 | 6.04000001 | -0.22732E-02 | -0.14400E-02 |
| 304 | 6.06000001 | -0.22448E-02 | -0.14200E-02 |
| 305 | 6.08000001 | -0.22168E-02 | -0.14000E-02 |
| 306 | 6.10000001 | -0.21892E-02 | -0.13800E-02 |
| 307 | 6.12000001 | -0.21618E-02 | -0.13700E-02 |
| 308 | 6.14000001 | -0.21348E-02 | -0.13500E-02 |
| 309 | 6.16000001 | -0.21084E-02 | -0.13200E-02 |
| 310 | 6.18000001 | -0.20826E-02 | -0.12900E-02 |
| 311 | 6.20000001 | -0.20572E-02 | -0.12700E-02 |
| 312 | 6.22000001 | -0.20320E-02 | -0.12600E-02 |
| 313 | 6.24000001 | -0.20072E-02 | -0.12400E-02 |
| 314 | 6.26000001 | -0.19828E-02 | -0.12200E-02 |
| 315 | 6.28000001 | -0.19586E-02 | -0.12100E-02 |
| 316 | 6.30000001 | -0.19350E-02 | -0.11800E-02 |
| 317 | 6.32000001 | -0.19118E-02 | -0.11600E-02 |
| 318 | 6.34000001 | -0.18890E-02 | -0.11400E-02 |
| 319 | 6.36000001 | -0.18674E-02 | -0.10800E-02 |
| 320 | 6.38000001 | -0.18462E-02 | -0.10600E-02 |
| 321 | 6.40000001 | -0.18252E-02 | -0.10500E-02 |
| 322 | 6.42000001 | -0.18044E-02 | -0.10400E-02 |
| 323 | 6.44000001 | -0.17840E-02 | -0.10200E-02 |
| 324 | 6.46000001 | -0.17638E-02 | -0.10100E-02 |
| 325 | 6.48000001 | -0.17439E-02 | -0.99300E-03 |

|     |           |              |              |
|-----|-----------|--------------|--------------|
| 326 | 6.5000001 | -0.17243E-02 | -0.98200E-03 |
| 327 | 6.5200001 | -0.17048E-02 | -0.97200E-03 |
| 328 | 6.5400001 | -0.16857E-02 | -0.95600E-03 |
| 329 | 6.5600001 | -0.16669E-02 | -0.93900E-03 |
| 330 | 6.5800001 | -0.16485E-02 | -0.92300E-03 |
| 331 | 6.6000001 | -0.16303E-02 | -0.90700E-03 |
| 332 | 6.6200001 | -0.16122E-02 | -0.90600E-03 |
| 333 | 6.6400001 | -0.15942E-02 | -0.90000E-03 |
| 334 | 6.6600001 | -0.15765E-02 | -0.88400E-03 |
| 335 | 6.6800001 | -0.15590E-02 | -0.87400E-03 |
| 336 | 6.7000001 | -0.15418E-02 | -0.86200E-03 |
| 337 | 6.7200001 | -0.15248E-02 | -0.84900E-03 |
| 338 | 6.7400001 | -0.15080E-02 | -0.84100E-03 |
| 339 | 6.7600001 | -0.14914E-02 | -0.83200E-03 |
| 340 | 6.7800001 | -0.14750E-02 | -0.82000E-03 |
| 341 | 6.8000001 | -0.14588E-02 | -0.80800E-03 |
| 342 | 6.8200001 | -0.14429E-02 | -0.79600E-03 |
| 343 | 6.8400001 | -0.14270E-02 | -0.79200E-03 |
| 344 | 6.8600001 | -0.14113E-02 | -0.78700E-03 |
| 345 | 6.8800001 | -0.13958E-02 | -0.77400E-03 |
| 346 | 6.9000001 | -0.13806E-02 | -0.76200E-03 |
| 347 | 6.9200001 | -0.13654E-02 | -0.75700E-03 |
| 348 | 6.9400001 | -0.13505E-02 | -0.74900E-03 |
| 349 | 6.9600001 | -0.13357E-02 | -0.74000E-03 |
| 350 | 6.9800001 | -0.13210E-02 | -0.73200E-03 |
| 351 | 7.0000001 | -0.13065E-02 | -0.72400E-03 |
| 352 | 7.0200001 | -0.12922E-02 | -0.71600E-03 |
| 353 | 7.0400001 | -0.12780E-02 | -0.70900E-03 |
| 354 | 7.0600001 | -0.12640E-02 | -0.70100E-03 |
| 355 | 7.0800001 | -0.12501E-02 | -0.69400E-03 |
| 356 | 7.1000001 | -0.12364E-02 | -0.68800E-03 |
| 357 | 7.1200001 | -0.12227E-02 | -0.68200E-03 |
| 358 | 7.1400001 | -0.12093E-02 | -0.67400E-03 |
| 359 | 7.1600001 | -0.11959E-02 | -0.66600E-03 |
| 360 | 7.1800001 | -0.11827E-02 | -0.66100E-03 |
| 361 | 7.2000001 | -0.11696E-02 | -0.65600E-03 |
| 362 | 7.2200001 | -0.11566E-02 | -0.64800E-03 |
| 363 | 7.2400001 | -0.11438E-02 | -0.64100E-03 |
| 364 | 7.2600001 | -0.11311E-02 | -0.63700E-03 |
| 365 | 7.2800001 | -0.11195E-02 | -0.58000E-03 |
| 366 | 7.3000001 | -0.11080E-02 | -0.57500E-03 |
| 367 | 7.3200001 | -0.10966E-02 | -0.57000E-03 |
| 368 | 7.3400001 | -0.10853E-02 | -0.56400E-03 |
| 369 | 7.3600001 | -0.10741E-02 | -0.55900E-03 |
| 370 | 7.3800001 | -0.10631E-02 | -0.55300E-03 |
| 371 | 7.4000001 | -0.10521E-02 | -0.54800E-03 |
| 372 | 7.4200001 | -0.10412E-02 | -0.54300E-03 |
| 373 | 7.4400001 | -0.10305E-02 | -0.53800E-03 |
| 374 | 7.4600001 | -0.10198E-02 | -0.53300E-03 |
| 375 | 7.4800001 | -0.10092E-02 | -0.52900E-03 |
| 376 | 7.5000001 | -0.99876E-03 | -0.52400E-03 |
| 377 | 7.5200001 | -0.98838E-03 | -0.51900E-03 |
| 378 | 7.5400001 | -0.97808E-03 | -0.51500E-03 |
| 379 | 7.5600001 | -0.96788E-03 | -0.51000E-03 |
| 380 | 7.5800001 | -0.95776E-03 | -0.50600E-03 |
| 381 | 7.6000001 | -0.94772E-03 | -0.50200E-03 |
| 382 | 7.6200001 | -0.93776E-03 | -0.49800E-03 |
| 383 | 7.6400001 | -0.92788E-03 | -0.49400E-03 |
| 384 | 7.6600001 | -0.91810E-03 | -0.48900E-03 |
| 385 | 7.6800001 | -0.90840E-03 | -0.48500E-03 |
| 386 | 7.7000001 | -0.89876E-03 | -0.48200E-03 |
| 387 | 7.7200001 | -0.88918E-03 | -0.47900E-03 |
| 388 | 7.7400001 | -0.87970E-03 | -0.47400E-03 |
| 389 | 7.7600001 | -0.87030E-03 | -0.47000E-03 |
| 390 | 7.7800001 | -0.86100E-03 | -0.46500E-03 |
| 391 | 7.8000001 | -0.85174E-03 | -0.46300E-03 |

|     |           |              |              |
|-----|-----------|--------------|--------------|
| 392 | 7.8200001 | -0.84252E-03 | -0.46100E-03 |
| 393 | 7.8400001 | -0.83334E-03 | -0.45900E-03 |
| 394 | 7.8600001 | -0.82428E-03 | -0.45300E-03 |
| 395 | 7.8800001 | -0.81528E-03 | -0.45000E-03 |
| 396 | 7.9000001 | -0.80634E-03 | -0.44700E-03 |
| 397 | 7.9200001 | -0.79746E-03 | -0.44400E-03 |
| 398 | 7.9400001 | -0.78864E-03 | -0.44100E-03 |
| 399 | 7.9600001 | -0.77988E-03 | -0.43800E-03 |
| 400 | 7.9800001 | -0.77120E-03 | -0.43400E-03 |
| 401 | 8.0000001 | -0.76258E-03 | -0.43100E-03 |
| 402 | 8.0200001 | -0.75400E-03 | -0.42900E-03 |
| 403 | 8.0400001 | -0.74648E-03 | -0.37600E-03 |
| 404 | 8.0600001 | -0.73900E-03 | -0.37400E-03 |
| 405 | 8.0800001 | -0.73160E-03 | -0.37000E-03 |
| 406 | 8.1000001 | -0.72424E-03 | -0.36800E-03 |
| 407 | 8.1200001 | -0.71692E-03 | -0.36600E-03 |
| 408 | 8.1400001 | -0.70966E-03 | -0.36300E-03 |
| 409 | 8.1600001 | -0.70246E-03 | -0.36000E-03 |
| 410 | 8.1800001 | -0.69532E-03 | -0.35700E-03 |
| 411 | 8.2000001 | -0.68824E-03 | -0.35400E-03 |
| 412 | 8.2200001 | -0.68122E-03 | -0.35100E-03 |
| 413 | 8.2400001 | -0.67424E-03 | -0.34900E-03 |
| 414 | 8.2600001 | -0.66728E-03 | -0.34800E-03 |
| 415 | 8.2800001 | -0.66036E-03 | -0.34600E-03 |
| 416 | 8.3000001 | -0.65350E-03 | -0.34300E-03 |
| 417 | 8.3200001 | -0.64668E-03 | -0.34100E-03 |
| 418 | 8.3400001 | -0.63990E-03 | -0.33900E-03 |
| 419 | 8.3600001 | -0.63318E-03 | -0.33600E-03 |
| 420 | 8.3800001 | -0.62650E-03 | -0.33400E-03 |
| 421 | 8.4000001 | -0.61988E-03 | -0.33100E-03 |
| 422 | 8.4200001 | -0.61330E-03 | -0.32900E-03 |
| 423 | 8.4400001 | -0.60672E-03 | -0.32900E-03 |
| 424 | 8.4600001 | -0.60018E-03 | -0.32700E-03 |
| 425 | 8.4800001 | -0.59368E-03 | -0.32500E-03 |
| 426 | 8.5000001 | -0.58722E-03 | -0.32300E-03 |
| 427 | 8.5200001 | -0.58080E-03 | -0.32100E-03 |
| 428 | 8.5400001 | -0.57442E-03 | -0.31900E-03 |
| 429 | 8.5600001 | -0.56808E-03 | -0.31700E-03 |
| 430 | 8.5800001 | -0.56176E-03 | -0.31600E-03 |
| 431 | 8.6000001 | -0.55548E-03 | -0.31400E-03 |
| 432 | 8.6200001 | -0.54924E-03 | -0.31200E-03 |
| 433 | 8.6400001 | -0.54302E-03 | -0.31100E-03 |
| 434 | 8.6600001 | -0.53684E-03 | -0.30900E-03 |
| 435 | 8.6800001 | -0.53070E-03 | -0.30700E-03 |
| 436 | 8.7000001 | -0.52460E-03 | -0.30500E-03 |
| 437 | 8.7200001 | -0.51852E-03 | -0.30400E-03 |
| 438 | 8.7400001 | -0.51246E-03 | -0.30300E-03 |
| 439 | 8.7600001 | -0.50644E-03 | -0.30100E-03 |
| 440 | 8.7800001 | -0.50044E-03 | -0.30000E-03 |
| 441 | 8.8000001 | -0.49446E-03 | -0.29900E-03 |
| 442 | 8.8200001 | -0.48852E-03 | -0.29700E-03 |
| 443 | 8.8400001 | -0.48262E-03 | -0.29500E-03 |
| 444 | 8.8600001 | -0.47676E-03 | -0.29300E-03 |
| 445 | 8.8800001 | -0.47092E-03 | -0.29200E-03 |
| 446 | 8.9000001 | -0.46512E-03 | -0.29000E-03 |
| 447 | 8.9200001 | -0.45932E-03 | -0.29000E-03 |
| 448 | 8.9400001 | -0.45356E-03 | -0.28800E-03 |
| 449 | 8.9600001 | -0.44782E-03 | -0.28700E-03 |
| 450 | 8.9800001 | -0.44310E-03 | -0.23600E-03 |
| 451 | 9.0000001 | -0.43842E-03 | -0.23400E-03 |
| 452 | 9.0200001 | -0.43376E-03 | -0.23300E-03 |
| 453 | 9.0400001 | -0.42912E-03 | -0.23200E-03 |
| 454 | 9.0600001 | -0.42450E-03 | -0.23100E-03 |
| 455 | 9.0800001 | -0.41992E-03 | -0.22900E-03 |
| 456 | 9.1000001 | -0.41536E-03 | -0.22800E-03 |
| 457 | 9.1200001 | -0.41082E-03 | -0.22700E-03 |

|     |            |              |              |
|-----|------------|--------------|--------------|
| 458 | 9.1400001  | -0.40630E-03 | -0.22600E-03 |
| 459 | 9.1600001  | -0.40180E-03 | -0.22500E-03 |
| 460 | 9.1800001  | -0.39732E-03 | -0.22400E-03 |
| 461 | 9.2000001  | -0.39286E-03 | -0.22300E-03 |
| 462 | 9.2200001  | -0.38844E-03 | -0.22100E-03 |
| 463 | 9.2400001  | -0.38404E-03 | -0.22000E-03 |
| 464 | 9.2600001  | -0.37966E-03 | -0.21900E-03 |
| 465 | 9.2800001  | -0.37530E-03 | -0.21800E-03 |
| 466 | 9.3000001  | -0.37096E-03 | -0.21700E-03 |
| 467 | 9.3200001  | -0.36664E-03 | -0.21600E-03 |
| 468 | 9.3400001  | -0.36234E-03 | -0.21500E-03 |
| 469 | 9.3600001  | -0.35806E-03 | -0.21400E-03 |
| 470 | 9.3800001  | -0.35380E-03 | -0.21300E-03 |
| 471 | 9.4000001  | -0.34956E-03 | -0.21200E-03 |
| 472 | 9.4200001  | -0.34534E-03 | -0.21100E-03 |
| 473 | 9.4400001  | -0.34114E-03 | -0.21000E-03 |
| 474 | 9.4600001  | -0.33694E-03 | -0.21000E-03 |
| 475 | 9.4800001  | -0.33276E-03 | -0.20900E-03 |
| 476 | 9.5000001  | -0.32860E-03 | -0.20800E-03 |
| 477 | 9.5200001  | -0.32446E-03 | -0.20700E-03 |
| 478 | 9.5400001  | -0.32034E-03 | -0.20600E-03 |
| 479 | 9.5600001  | -0.31624E-03 | -0.20500E-03 |
| 480 | 9.5800001  | -0.31216E-03 | -0.20400E-03 |
| 481 | 9.6000001  | -0.30810E-03 | -0.20300E-03 |
| 482 | 9.6200001  | -0.30404E-03 | -0.20300E-03 |
| 483 | 9.6400001  | -0.30000E-03 | -0.20200E-03 |
| 484 | 9.6600001  | -0.29598E-03 | -0.20100E-03 |
| 485 | 9.6800001  | -0.29198E-03 | -0.20000E-03 |
| 486 | 9.7000001  | -0.28800E-03 | -0.19900E-03 |
| 487 | 9.7200001  | -0.28402E-03 | -0.19900E-03 |
| 488 | 9.7400001  | -0.28006E-03 | -0.19800E-03 |
| 489 | 9.7600001  | -0.27612E-03 | -0.19700E-03 |
| 490 | 9.7800001  | -0.27218E-03 | -0.19700E-03 |
| 491 | 9.8000001  | -0.26826E-03 | -0.19600E-03 |
| 492 | 9.8200001  | -0.26436E-03 | -0.19500E-03 |
| 493 | 9.8400001  | -0.26048E-03 | -0.19400E-03 |
| 494 | 9.8600001  | -0.25660E-03 | -0.19400E-03 |
| 495 | 9.8800001  | -0.25274E-03 | -0.19300E-03 |
| 496 | 9.9000001  | -0.24890E-03 | -0.19200E-03 |
| 497 | 9.9200001  | -0.24506E-03 | -0.19200E-03 |
| 498 | 9.9400001  | -0.24124E-03 | -0.19100E-03 |
| 499 | 9.9600001  | -0.23744E-03 | -0.19000E-03 |
| 500 | 9.9800001  | -0.23364E-03 | -0.19000E-03 |
| 501 | 10.0000001 | -0.22986E-03 | -0.18900E-03 |
| 502 | 10.0200001 | -0.22610E-03 | -0.18800E-03 |
| 503 | 10.0400001 | -0.22234E-03 | -0.18800E-03 |
| 504 | 10.0600001 | -0.21860E-03 | -0.18700E-03 |
| 505 | 10.0800001 | -0.21488E-03 | -0.18600E-03 |
| 506 | 10.1000001 | -0.21118E-03 | -0.18500E-03 |
| 507 | 10.1200001 | -0.20748E-03 | -0.18500E-03 |
| 508 | 10.1400001 | -0.20378E-03 | -0.18500E-03 |
| 509 | 10.1600001 | -0.20010E-03 | -0.18400E-03 |
| 510 | 10.1800001 | -0.19642E-03 | -0.18400E-03 |
| 511 | 10.2000001 | -0.19376E-03 | -0.13300E-03 |
| 512 | 10.2200001 | -0.19112E-03 | -0.13200E-03 |
| 513 | 10.2400001 | -0.18848E-03 | -0.13200E-03 |
| 514 | 10.2600001 | -0.18586E-03 | -0.13100E-03 |
| 515 | 10.2800001 | -0.18324E-03 | -0.13100E-03 |
| 516 | 10.3000001 | -0.18064E-03 | -0.13000E-03 |
| 517 | 10.3200001 | -0.17806E-03 | -0.12900E-03 |
| 518 | 10.3400001 | -0.17548E-03 | -0.12900E-03 |
| 519 | 10.3600001 | -0.17290E-03 | -0.12900E-03 |
| 520 | 10.3800001 | -0.17034E-03 | -0.12800E-03 |
| 521 | 10.4000001 | -0.16780E-03 | -0.12700E-03 |
| 522 | 10.4200001 | -0.16526E-03 | -0.12700E-03 |
| 523 | 10.4400001 | -0.16274E-03 | -0.12600E-03 |



|     |            |              |              |
|-----|------------|--------------|--------------|
| 524 | 10.4600001 | -0.16022E-03 | -0.12600E-03 |
| 525 | 10.4800001 | -0.15770E-03 | -0.12600E-03 |
| 526 | 10.5000001 | -0.15518E-03 | -0.12600E-03 |
| 527 | 10.5200001 | -0.15268E-03 | -0.12500E-03 |
| 528 | 10.5400001 | -0.15018E-03 | -0.12500E-03 |
| 529 | 10.5600001 | -0.14770E-03 | -0.12400E-03 |
| 530 | 10.5800001 | -0.14524E-03 | -0.12300E-03 |
| 531 | 10.6000001 | -0.14278E-03 | -0.12300E-03 |
| 532 | 10.6200001 | -0.14034E-03 | -0.12200E-03 |
| 533 | 10.6400001 | -0.13790E-03 | -0.12200E-03 |
| 534 | 10.6600001 | -0.13546E-03 | -0.12200E-03 |
| 535 | 10.6800001 | -0.13304E-03 | -0.12100E-03 |
| 536 | 10.7000001 | -0.13062E-03 | -0.12100E-03 |
| 537 | 10.7200001 | -0.12820E-03 | -0.12100E-03 |
| 538 | 10.7400001 | -0.12578E-03 | -0.12100E-03 |
| 539 | 10.7600001 | -0.12336E-03 | -0.12100E-03 |
| 540 | 10.7800001 | -0.12094E-03 | -0.12100E-03 |
| 541 | 10.8000001 | -0.11852E-03 | -0.12100E-03 |
| 542 | 10.8200001 | -0.11610E-03 | -0.12100E-03 |
| 543 | 10.8400001 | -0.11368E-03 | -0.12100E-03 |
| 544 | 10.8600001 | -0.11126E-03 | -0.12100E-03 |
| 545 | 10.8800001 | -0.10884E-03 | -0.12100E-03 |
| 546 | 10.9000001 | -0.10642E-03 | -0.12100E-03 |
| 547 | 10.9200001 | -0.10400E-03 | -0.12100E-03 |
| 548 | 10.9400001 | -0.10158E-03 | -0.12100E-03 |
| 549 | 10.9600001 | -0.99158E-04 | -0.12100E-03 |
| 550 | 10.9800001 | -0.96738E-04 | -0.12100E-03 |
| 551 | 11.0000001 | -0.94338E-04 | -0.12000E-03 |
| 552 | 11.0200001 | -0.91938E-04 | -0.12000E-03 |
| 553 | 11.0400001 | -0.89558E-04 | -0.11900E-03 |
| 554 | 11.0600001 | -0.87178E-04 | -0.11900E-03 |
| 555 | 11.0800001 | -0.84818E-04 | -0.11800E-03 |
| 556 | 11.1000001 | -0.82458E-04 | -0.11800E-03 |
| 557 | 11.1200001 | -0.80118E-04 | -0.11700E-03 |
| 558 | 11.1400001 | -0.77778E-04 | -0.11700E-03 |
| 559 | 11.1600001 | -0.75458E-04 | -0.11600E-03 |
| 560 | 11.1800001 | -0.73158E-04 | -0.11500E-03 |
| 561 | 11.2000001 | -0.70878E-04 | -0.11400E-03 |
| 562 | 11.2200001 | -0.68598E-04 | -0.11400E-03 |
| 563 | 11.2400001 | -0.66318E-04 | -0.11400E-03 |
| 564 | 11.2600001 | -0.64058E-04 | -0.11300E-03 |
| 565 | 11.2800001 | -0.61798E-04 | -0.11300E-03 |
| 566 | 11.3000001 | -0.59538E-04 | -0.11300E-03 |
| 567 | 11.3200001 | -0.57298E-04 | -0.11200E-03 |
| 568 | 11.3400001 | -0.55058E-04 | -0.11200E-03 |
| 569 | 11.3600001 | -0.52818E-04 | -0.11200E-03 |
| 570 | 11.3800001 | -0.50598E-04 | -0.11100E-03 |
| 571 | 11.4000001 | -0.48378E-04 | -0.11100E-03 |
| 572 | 11.4200001 | -0.46178E-04 | -0.11000E-03 |
| 573 | 11.4400001 | -0.43978E-04 | -0.11000E-03 |
| 574 | 11.4600001 | -0.41778E-04 | -0.11000E-03 |
| 575 | 11.4800001 | -0.39598E-04 | -0.10900E-03 |
| 576 | 11.5000001 | -0.37418E-04 | -0.10900E-03 |
| 577 | 11.5200001 | -0.35258E-04 | -0.10800E-03 |
| 578 | 11.5400001 | -0.33098E-04 | -0.10800E-03 |
| 579 | 11.5600001 | -0.30938E-04 | -0.10800E-03 |
| 580 | 11.5800001 | -0.28778E-04 | -0.10800E-03 |
| 581 | 11.6000001 | -0.26638E-04 | -0.10700E-03 |
| 582 | 11.6200001 | -0.24498E-04 | -0.10700E-03 |
| 583 | 11.6400001 | -0.22358E-04 | -0.10700E-03 |
| 584 | 11.6600001 | -0.20218E-04 | -0.10700E-03 |
| 585 | 11.6800001 | -0.18098E-04 | -0.10600E-03 |
| 586 | 11.7000001 | -0.15978E-04 | -0.10600E-03 |
| 587 | 11.7200001 | -0.13858E-04 | -0.10600E-03 |
| 588 | 11.7400001 | -0.11738E-04 | -0.10600E-03 |
| 589 | 11.7600001 | -0.11738E-04 | 0.00000E+00  |

|     |            |              |              |
|-----|------------|--------------|--------------|
| 590 | 11.7800001 | 0.000000E+00 | 0.000000E+00 |
| 591 | 11.8000001 | 0.000000E+00 | 0.000000E+00 |
| 592 | 11.8200001 | 0.000000E+00 | 0.000000E+00 |
| 593 | 11.8400001 | 0.000000E+00 | 0.000000E+00 |
| 594 | 11.8600001 | 0.000000E+00 | 0.000000E+00 |
| 595 | 11.8800001 | 0.000000E+00 | 0.000000E+00 |
| 596 | 11.9000001 | 0.000000E+00 | 0.000000E+00 |
| 597 | 11.9200001 | 0.000000E+00 | 0.000000E+00 |
| 598 | 11.9400001 | 0.000000E+00 | 0.000000E+00 |
| 599 | 11.9600001 | 0.000000E+00 | 0.000000E+00 |
| 600 | 11.9800001 | 0.000000E+00 | 0.000000E+00 |
